# Supplementary material for: An explainable model of host genetic interactions linked to COVID-19 severity
Source: Research Square preprint supplement (doi:10.21203/rs.3.rs-1062190/v1), 2021-11-10
Supplement: Supplementary file 1 [file 39e5d6e2113b75228d9d50be.xlsx]

## Sheet: S1
Table S1: screened variants annotated with log-odds ratio statistics, statistics of the importance from decision-tree models, dbSNP ids and Reactome pathways and clusters
Unnamed: 0	Chr	Start	End	Ref	Alt	Gene.refGene	ExonicFunc.refGene	AAChange.refGene	CADD_phred	AF543	AF0	LogAFRatio	MUT543	MUT0	WT543	WT0	Odds-Ratio	Log Odds-Ratio	LOR Pvalue	LOR CI	adjP	RF_nonzero	XGB_nonzero	avsnp150	reactome	reactome_FIclusters
112	chr16	31222792	31222792	T	G	TRIM72				0.0030426	0.0272436	-3.16254	3	17	983	607	0.10897	-2.21668	0.000419043	(-3.4482214488737153, -0.9851413200778334)	0.917067	5	5		['Muscle contraction', 'Smooth Muscle Contraction']	34
97	chr8	143927792	143927792	C	T	PLEC				0.03861	0.0123839	1.64051	40	8	996	638	3.20281	1.16403	0.00288178	(0.39845934318641907, 1.929598533202166)	0.917067	5	5	rs140300753	['Apoptosis', 'Apoptotic cleavage of cellular proteins', 'Extracellular matrix organization', 'Collagen formation', 'Cell-Cell communication', 'Assembly of collagen fibrils and other multimeric structures', 'Caspase-mediated cleavage of cytoskeletal proteins', 'Type I hemidesmosome assembly', 'Cell junction organization', 'Programmed Cell Death', 'Apoptotic execution phase']	3
28	chr19	4499600	4499600	A	G	HDGFL2	nonsynonymous SNV	HDGFL2:NM_001001520:exon14:c.A1685G:p.N562S,HDGFL2:NM_001348169:exon14:c.A1757G:p.N586S,HDGFL2:NM_032631:exon14:c.A1685G:p.N562S	0.576	0.00579151	0.0278638	-2.26638	6	18	1030	628	0.203236	-1.59339	0.000777295	(-2.522635394988912, -0.6641370118582727)	0.917067	5	5	rs180870155	-	-
73	chr11	62752093	62752093	G	C	ZBTB3	nonsynonymous SNV	ZBTB3:NM_001363108:exon2:c.C1572G:p.I524M,ZBTB3:NM_001363109:exon2:c.C1572G:p.I524M,ZBTB3:NM_001370809:exon2:c.C1572G:p.I524M,ZBTB3:NM_024784:exon2:c.C1722G:p.I574M	11.61	0.0279923	0.00773994	1.85463	29	5	1007	641	3.69196	1.30616	0.00730088	(0.351921954809971, 2.2603910086989907)	0.917067	5	5	rs544641	-	-
74	chr15	49028192	49028192	A	G	SECISBP2L				0.0289575	0.00619195	2.22547	30	4	1006	642	4.78628	1.56575	0.0034073	(0.517796216416712, 2.6137117307283706)	0.917067	5	5	rs75595801	-	-
136	chr15	85244679	85244679	G	A	GOLGA6L3	nonsynonymous SNV	GOLGA6L3:NM_001310153:exon6:c.G689A:p.R230H		0.091358	0.0284553	1.68283	74	14	736	478	3.43284	1.23339	3.34658e-05	(0.6506728210325532, 1.8161039336704299)	0.643425	5	5	rs367838829	-	-
28	chr10	46837575	46837575	A	G	BMS1P1;FRMPD2B				0.0318066	0.103113	-1.69683	25	53	761	461	0.285746	-1.25265	5.25989e-07	(-1.742058697634164, -0.7632441094637537)	0.0213926	5	5		-	-
54	chr5	77077343	77077343	G	C	ZBED3	nonsynonymous SNV	ZBED3:NM_001329564:exon2:c.C536G:p.A179G,ZBED3:NM_032367:exon3:c.C536G:p.A179G	19.54	0.00331858	0.0299296	-3.17293	3	17	901	551	0.107919	-2.22637	0.000397036	(-3.45831703201482, -0.9944259756722376)	0.917067	5	5	rs531117283	-	-
160	chr17	81199384	81199384	T	C	CEP131	nonsynonymous SNV	CEP131:NM_001009811:exon10:c.A1189G:p.T397A,CEP131:NM_001319228:exon10:c.A1189G:p.T397A,CEP131:NM_001319229:exon10:c.A1189G:p.T397A,CEP131:NM_014984:exon10:c.A1189G:p.T397A	0.001	0.969112	0.995356	-0.0385493	1004	643	32	3	0.146384	-1.92152	0.00151777	(-3.109095158292207, -0.7339469179429161)	0.917067	5	5	rs2659015	['Cell Cycle', 'Organelle biogenesis and maintenance', 'Regulation of PLK1 Activity at G2/M Transition', 'Loss of Nlp from mitotic centrosomes', 'Recruitment of mitotic centrosome proteins and complexes', 'Loss of proteins required for interphase microtubule organization from the centrosome', 'Centrosome maturation', 'Recruitment of NuMA to mitotic centrosomes', 'Mitotic G2-G2/M phases', 'Cilium …	4
101	chr3	158690141	158690141	-	T	GFM1				0.0337838	0.00928793	1.8629	35	6	1001	640	3.7296	1.3163	0.00307972	(0.44461454319619076, 2.187989435403521)	0.917067	5	5	rs370496368	['Metabolism of proteins', 'Mitochondrial translation', 'Mitochondrial translation elongation', 'Translation']	17
109	chr2	135390825	135390827	AAA	-	ZRANB3				0.0261122	0.00773994	1.75433	27	5	1007	641	3.43734	1.2347	0.0116534	(0.2753353923129248, 2.1940596432317467)	0.917067	5	5	rs766179776	-	-
124	chr2	175167648	175167648	G	A	MIR933				0.0376448	0.0123839	1.60398	39	8	997	638	3.11961	1.13771	0.00365382	(0.37053396740433, 1.904881268261195)	0.917067	5	5	rs79402775	-	-
120	chr1	48399449	48399449	C	T	SPATA6	nonsynonymous SNV	SPATA6:NM_001286239:exon6:c.G640A:p.E214K,SPATA6:NM_001286238:exon7:c.G682A:p.E228K,SPATA6:NM_019073:exon7:c.G682A:p.E228K	26.6	0.0125483	0.0386997	-1.62483	13	25	1023	621	0.31566	-1.15309	0.000851495	(-1.8306565326208288, -0.47552377022879244)	0.917067	5	5	rs77303590	-	-
173	chr1	120913483	120913483	A	C	LOC100996720				0.80303	0.974359	-0.278999	53	76	13	2	0.107287	-2.23224	0.00422893	(-3.761704982230956, -0.702782225040645)	0.917067	5	5		-	-
27	chr9	34557898	34557898	A	T	CNTFR	nonsynonymous SNV	CNTFR:NM_001842:exon4:c.T406A:p.Y136N,CNTFR:NM_001207011:exon5:c.T406A:p.Y136N,CNTFR:NM_147164:exon5:c.T406A:p.Y136N	23.3	0.0559846	0.0170279	1.71713	58	11	978	635	3.4235	1.23066	0.00021727	(0.5784108215033236, 1.8829153117085213)	0.917067	5	5		['Cytokine Signaling in Immune system', 'Immune System', 'Signaling by Interleukins', 'Interleukin-6 family signaling', 'IL-6-type cytokine receptor ligand interactions']	1
62	chr9	76328028	76328028	G	C	PCSK5	nonsynonymous SNV	PCSK5:NM_001190482:exon32:c.G4278C:p.L1426F	11.66	0.0357143	0.00928793	1.94307	37	6	999	640	3.95062	1.37387	0.00192721	(0.5055896682739233, 2.2421540139687433)	0.917067	5	5	rs150021157	['Signal Transduction', 'Signaling by NTRKs', 'NGF processing', 'Plasma lipoprotein assembly, remodeling, and clearance', 'Transport of small molecules', 'Assembly of active LPL and LIPC lipase complexes', 'Plasma lipoprotein remodeling', 'Signaling by Receptor Tyrosine Kinases', 'Expression and Processing of Neurotrophins']	1
24	chr16	2038404	2038416	CCCCCCTTCCCCT	-	SLC9A3R2				0.0250965	0.00619195	2.01902	26	4	1010	642	4.13168	1.41868	0.00854202	(0.36137690869097905, 2.4759928328215164)	0.917067	5	4	rs763165669	-	-
51	chr16	14926687	14926687	C	T	LOC100288162;PKD1P3-NPIPA1				0.00371747	0.025463	-2.77601	2	11	536	421	0.142809	-1.94625	0.011642	(-3.4582826353865928, -0.43421620386709936)	0.917067	5	4		-	-
98	chr16	30223145	30223146	GT	-	NPIPB12;NPIPB13	frameshift deletion	NPIPB13:NM_001321892:exon9:c.3300_3301del:p.P1101Rfs*9,NPIPB12:NM_001355401:exon11:c.2670_2671del:p.P891Rfs*9		0.0789474	0.0151515	2.38143	39	4	455	260	5.57143	1.71765	0.00121076	(0.677420148983517, 2.757882845165149)	0.917067	5	4		-	-
26	chr19	4496869	4496869	-	TT	HDGFL2				0.0359281	0.00619195	2.53665	36	4	966	642	5.98137	1.78865	0.000730166	(0.7508474565273966, 2.8264506370999287)	0.917067	5	4	rs34622619	-	-
62	chr11	59211920	59211920	G	A	MPEG1	nonsynonymous SNV	MPEG1:NM_001039396:exon1:c.C946T:p.P316S	6.131	0.0183398	0.00309598	2.56651	19	2	1017	644	6.01573	1.79438	0.0160291	(0.3340173179874051, 3.2547389393371726)	0.917067	5	4	rs11229878	-	-
92	chr15	67181476	67181476	G	C	SMAD3				0.0135135	0.0417957	-1.62895	14	27	1022	619	0.314054	-1.15819	0.000510132	(-1.81136087854306, -0.5050211903931878)	0.917067	5	4	rs897912452	['Signaling by NODAL', 'Developmental Biology', 'Cytokine Signaling in Immune system', 'Signaling by Activin', 'Signal Transduction', 'Immune System', 'Signaling by TGF-beta Receptor Complex', 'Generic Transcription Pathway', 'Downregulation of TGF-beta receptor signaling', 'TGF-beta receptor signaling activates SMADs', 'Transcriptional activity of SMAD2/SMAD3:SMAD4 heterotrimer', 'Downregulation…	2
140	chr15	89333596	89333596	-	TGCTGC	POLG	nonframeshift insertion	POLG:NM_001126131:exon2:c.158_159insGCAGCA:p.Q55_P56insQQ,POLG:NM_002693:exon2:c.158_159insGCAGCA:p.Q55_P56insQQ		0.0289575	0.00619195	2.22547	30	4	1006	642	4.78628	1.56575	0.0034073	(0.517796216416712, 2.6137117307283706)	0.917067	5	4	rs41550117	-	-
67	chr10	79307376	79307376	-	GGGGGGGGGG	ZMIZ1				0.0135135	0.0481366	-1.83273	14	31	1022	613	0.270879	-1.30608	6.17555e-05	(-1.9450913826089353, -0.667072036785716)	0.917067	5	4		-	2
20	chr17	4551971	4551971	G	T	MYBBP1A	nonsynonymous SNV	MYBBP1A:NM_001105538:exon8:c.C932A:p.A311E,MYBBP1A:NM_014520:exon8:c.C932A:p.A311E	9.711	0.00579151	0.0216718	-1.90381	6	14	1030	632	0.262968	-1.33572	0.00647201	(-2.2972010349220033, -0.3742440600060507)	0.917067	5	4	rs117615621	['Epigenetic regulation of gene expression', 'Positive epigenetic regulation of rRNA expression', 'B-WICH complex positively regulates rRNA expression', 'Gene expression (Transcription)']	0
98	chr17	41097583	41097583	C	T	KRTAP4-8	nonsynonymous SNV	KRTAP4-8:NM_031960:exon1:c.G502A:p.A168T	17.06	0.0151007	0.061828	-2.03365	9	23	587	349	0.232649	-1.45822	0.000256998	(-2.240143232181706, -0.6763018402554928)	0.917067	5	4	rs72625995	['Developmental Biology', 'Keratinization']	-
39	chr6	35468794	35468794	C	T	RPL10A				0.023166	0.00464396	2.31858	24	3	1012	643	5.083	1.6259	0.00814187	(0.4216112383728938, 2.8301935937671936)	0.917067	5	4	rs11553979	['L13a-mediated translational silencing of Ceruloplasmin expression', 'SRP-dependent cotranslational protein targeting to membrane', 'Metabolism of proteins', 'Major pathway of rRNA processing in the nucleolus and cytosol', 'rRNA processing', 'Eukaryotic Translation Initiation', 'Formation of a pool of free 40S subunits', 'GTP hydrolysis and joining of the 60S ribosomal subunit', 'Cap-dependent T…	4
21	chr9	27060962	27060962	A	-	IFT74				0.0157895	0.0572391	-1.85804	15	34	935	560	0.264234	-1.33092	2.32283e-05	(-1.9474016970854426, -0.7144384410614448)	0.492977	5	4		['Organelle biogenesis and maintenance', 'Cilium Assembly', 'Intraflagellar transport']	13
49	chr9	62843856	62843856	C	A	PTGER4P2-CDK2AP2P2				0.0328185	0.00928793	1.82108	34	6	1002	640	3.61943	1.28632	0.00390015	(0.41278101067587225, 2.1598508895181565)	0.917067	5	4	rs370931238	-	-
17	chrY	11350975	11350975	T	G	TTTY23;GYG2P1				0.0566038	0.181373	-1.67999	42	74	700	334	0.270811	-1.30633	1.61969e-10	(-1.7067896620944265, -0.9058799718805841)	1.90305e-05	5	4	rs79975691	-	-
138	chr16	69962973	69962973	C	G	CLEC18A				0.0202703	0.00464396	2.12594	21	3	1015	643	4.43448	1.48941	0.0161674	(0.2756680734709025, 2.703153890163186)	0.917067	4	4	rs200717896	-	-
174	chr16	88809651	88809651	A	G	APRT				0.0173745	0.00059453	4.86908	18	0	1018	646	22.8448	3.12872	0.0291909	(0.31695296891697167, 5.940493521339516)	0.917067	4	4	rs8191497	['Metabolism', 'Metabolism of nucleotides', 'Innate Immune System', 'Immune System', 'Neutrophil degranulation', 'Purine salvage', 'Nucleotide salvage']	-
19	chr8	8240730	8240730	G	C	FAM86B3P				0.00482625	0.0185759	-1.94445	5	12	1031	634	0.256224	-1.3617	0.0108724	(-2.409653869768941, -0.31375466409832775)	0.917067	4	4	rs74614308	-	-
5	chr11	709567	709567	G	A	EPS8L2	nonsynonymous SNV	EPS8L2:NM_022772:exon3:c.G59A:p.R20Q	23	0.0212355	0.00464396	2.19305	22	3	1014	643	4.65023	1.53692	0.0128154	(0.3266023926813941, 2.747231016871998)	0.917067	4	4	rs12283031	['Sensory processing of sound', 'Sensory processing of sound by inner hair cells of the cochlea', 'Sensory processing of sound by outer hair cells of the cochlea', 'Sensory Perception']	-
39	chr13	99970419	99970419	C	0	ZIC5				0.05625	0.139535	-1.3107	27	48	453	296	0.36755	-1.0009	7.08817e-05	(-1.4946220308168015, -0.507171601308271)	0.917067	4	4		-	-
124	chrX	106849220	106849220	-	T	TBC1D8B				0.0166016	0.00154799	3.42285	17	1	1007	645	10.8888	2.38773	0.0204669	(0.36852562366833075, 4.406939912598521)	0.917067	4	4	rs761948032	['Membrane Trafficking', 'trans-Golgi Network Vesicle Budding', 'Golgi Associated Vesicle Biogenesis', 'Vesicle-mediated transport']	-
37	chr10	47523417	47523417	T	C	AGAP9	nonsynonymous SNV	AGAP9:NM_001190810:exon1:c.A110G:p.E37G	9.562	0.00483559	0.0185759	-1.94166	5	12	1029	634	0.256722	-1.35976	0.0109863	(-2.4077155768483856, -0.3118094606530615)	0.917067	4	4		-	-
57	chr10	71295850	71295850	G	A	UNC5B	nonsynonymous SNV	UNC5B:NM_001244889:exon13:c.G2182A:p.V728M,UNC5B:NM_170744:exon14:c.G2215A:p.V739M	20.4	0.00675676	0.0247678	-1.87406	7	16	1029	630	0.267857	-1.3173	0.00386523	(-2.2110026464172403, -0.4236003328486373)	0.917067	4	4	rs61749231	['Apoptosis', 'Developmental Biology', 'Netrin-1 signaling', 'Netrin mediated repulsion signals', 'Caspase activation via Dependence Receptors in the absence of ligand', 'Axon guidance', 'Caspase activation via extrinsic apoptotic signalling pathway', 'Programmed Cell Death', 'Nervous system development']	8
137	chr10	133093164	133093164	G	A	ADGRA1			0.18	0.0395753	0.0139319	1.50621	41	9	995	637	2.91647	1.07037	0.00396975	(0.3420790105245579, 1.7986698050387588)	0.917067	4	4	rs113910052	-	-
140	chr10	133626722	133626722	G	C	FRG2B	nonsynonymous SNV	FRG2B:NM_001080998:exon1:c.C21G:p.D7E	0.047	0.011583	0.0386997	-1.74031	12	25	1024	621	0.291094	-1.23411	0.000505524	(-1.9296077563096672, -0.5386120411826808)	0.917067	4	4	rs9630045	-	-
1	chr22	15820514	15820514	A	G	BMS1P22;DUXAP8				0.490099	0.245902	0.994992	99	30	103	92	2.94757	1.08098	1.93264e-05	(0.5850970448200536, 1.5768670697636242)	0.434822	4	4		-	-
25	chr22	20690571	20690571	C	T	POM121L4P				0.00965251	0.0278638	-1.52941	10	18	1026	628	0.340048	-1.07867	0.00667504	(-1.8580419290856005, -0.2992971192436693)	0.917067	4	4	rs200229741	-	-
26	chr22	21126811	21126811	G	C	BCRP2;FAM230B			0.001	0.0773026	0.194149	-1.32857	47	73	561	303	0.34774	-1.0563	1.30837e-07	(-1.4485772547081917, -0.6640226241951277)	0.00658829	4	4	rs80145194	-	-
118	chr17	49973831	49973831	T	A	DLX4	nonsynonymous SNV	DLX4:NM_001934:exon2:c.T395A:p.L132H,DLX4:NM_138281:exon3:c.T611A:p.L204H	23.2	0.0733591	0.0263158	1.47905	76	17	960	629	2.92917	1.07472	8.33765e-05	(0.5393466542816564, 1.6100892826556912)	0.917067	4	4		-	-
46	chr3	58365934	58365935	TT	-	PXK				0.0289575	0.00773994	1.90354	30	5	1006	641	3.82306	1.34105	0.00575948	(0.38913148718977575, 2.292971663788305)	0.917067	4	4	rs796412336	-	-
67	chr14	80895798	80895798	-	A	CEP128				0.0426357	0.0108359	1.97624	44	7	988	639	4.06536	1.4025	0.00062596	(0.5987690082971568, 2.206233474688071)	0.917067	4	4		-	-
75	chr2	97213425	97213425	G	C	ANKRD36	nonsynonymous SNV	ANKRD36:NM_001354587:exon59:c.G3476C:p.C1159S	0.001	0.72	0.892308	-0.309544	72	116	28	14	0.310345	-1.17007	0.00115592	(-1.8758010116189343, -0.46434149368157485)	0.917067	4	4	rs140729730	-	-
80	chr2	99243492	99243499	AGATAGAT	-	LYG2				0.00772201	0.0232198	-1.58831	8	15	1028	631	0.327367	-1.11667	0.0112829	(-1.9804465495641133, -0.252899936228429)	0.917067	4	4	rs374944243	-	-
10	chr1	1284098	1284098	G	0	SCNN1D				0.0135135	0.0403727	-1.57898	14	26	1022	618	0.325606	-1.12207	0.000821176	(-1.779420585672542, -0.4647144577518234)	0.917067	4	4		['Stimuli-sensing channels', 'Transport of small molecules', 'Ion channel transport']	-
21	chr1	3493967	3493967	G	A	MEGF6				0.00965251	0.0325077	-1.75181	10	21	1026	625	0.290077	-1.23761	0.00140593	(-1.9971894857531742, -0.4780279556942074)	0.917067	4	4	rs75116314	-	-
240	chr1	158614313	158614313	-	AAA	SPTA1				0.023166	0.00464396	2.31858	24	3	1012	643	5.083	1.6259	0.00814187	(0.4216112383728938, 2.8301935937671936)	0.917067	4	4	rs5778083	['Developmental Biology', 'Signal Transduction', 'ER to Golgi Anterograde Transport', 'Membrane Trafficking', 'NCAM signaling for neurite out-growth', 'Metabolism of proteins', 'Axon guidance', 'Asparagine N-linked glycosylation', 'Vesicle-mediated transport', 'RAF/MAP kinase cascade', 'MAPK family signaling cascades', 'MAPK1/MAPK3 signaling', 'Post-translational protein modification', 'COPI-medi…	4
18	chr16	1443487	1443487	G	C	CCDC154				0.0250965	0.00619195	2.01902	26	4	1010	642	4.13168	1.41868	0.00854202	(0.36137690869097905, 2.4759928328215164)	0.917067	5	3	rs112232284	-	-
109	chr16	31130924	31130924	C	G	KAT8	nonsynonymous SNV	KAT8:NM_182958:exon10:c.C1336G:p.R446G	10.62	0.0511583	0.0170279	1.58707	53	11	983	635	3.11246	1.13541	0.000706313	(0.4784031445942579, 1.7924218944042951)	0.917067	5	3	rs572043246	['HATs acetylate histones', 'Chromatin modifying enzymes', 'Chromatin organization']	3
176	chr16	88826880	88826880	G	A	GALNS				0.0202703	0.00309598	2.7109	21	2	1015	644	6.66207	1.89643	0.0105646	(0.4426743669473667, 3.350185816636521)	0.917067	5	3	rs139088253	['Metabolism', 'Glycosaminoglycan metabolism', 'Keratan sulfate/keratin metabolism', 'Innate Immune System', 'Immune System', 'Keratan sulfate degradation', 'Neutrophil degranulation', 'Metabolism of carbohydrates', 'Disease', 'Mucopolysaccharidoses', 'MPS IV - Morquio syndrome A', 'Diseases of carbohydrate metabolism', 'Diseases of metabolism']	-
37	chr8	17248267	17248267	T	C	VPS37A				0.0183398	0.00059453	4.94708	19	0	1017	646	24.1377	3.18377	0.0263612	(0.3740004188284236, 5.993546116092432)	0.917067	5	3	rs776815227	['Membrane Trafficking', 'Vesicle-mediated transport', 'Endosomal Sorting Complex Required For Transport (ESCRT)', 'HIV Life Cycle', 'Budding and maturation of HIV virion', 'Late Phase of HIV Life Cycle', 'HIV Infection', 'Disease', 'Membrane binding and targetting of GAG proteins', 'Synthesis And Processing Of GAG, GAGPOL Polyproteins', 'Assembly Of The HIV Virion', 'Infectious disease', 'HCMV I…	-
140	chr19	35619604	35619604	-	AAAC	HAUS5				0.0349515	0.00931677	1.90745	36	6	994	638	3.85111	1.34836	0.00238345	(0.47839728906157886, 2.218323802770961)	0.917067	5	3		['Cell Cycle', 'Organelle biogenesis and maintenance', 'Regulation of PLK1 Activity at G2/M Transition', 'Loss of Nlp from mitotic centrosomes', 'Recruitment of mitotic centrosome proteins and complexes', 'Loss of proteins required for interphase microtubule organization from the centrosome', 'Centrosome maturation', 'Recruitment of NuMA to mitotic centrosomes', 'Mitotic G2-G2/M phases', 'Cilium …	4
6	chr11	777390	777390	G	A	GATD1				0.0174081	0.00154799	3.49129	18	1	1016	645	11.4272	2.43599	0.0178758	(0.4199056723885608, 4.452081220718458)	0.917067	5	3	rs57751948	-	-
150	chr11	124265319	124265319	T	G	OR8G5	nonsynonymous SNV	OR8G5:NM_001005198:exon1:c.T493G:p.L165V	17.59	0.034749	0.00928793	1.90354	36	6	1000	640	3.84	1.34547	0.00243474	(0.4755332512162036, 2.215411481983068)	0.917067	5	3	rs11219544	['Olfactory Signaling Pathway', 'Sensory Perception']	-
178	chrX	156009937	156009937	G	A	IL9R	nonsynonymous SNV	IL9R:NM_002186:exon9:c.G1094A:p.R365H	0.193	0.00882353	0.0357143	-2.01707	9	23	1011	621	0.240356	-1.42563	0.000323379	(-2.202701528929568, -0.6485660224302789)	0.917067	5	3	rs147385831	['Cytokine Signaling in Immune system', 'Immune System', 'Signaling by Interleukins', 'Interleukin-2 family signaling', 'Interleukin-9 signaling']	1
94	chr12	101669940	101669940	G	-	MYBPC1				0.0125313	0.0485075	-1.95267	10	26	788	510	0.248926	-1.3906	0.000220508	(-2.1283667389317134, -0.6528308794021753)	0.917067	5	3	rs369187398	['Striated Muscle Contraction', 'Muscle contraction']	9
5	chr17	745424	745424	G	T	GEMIN4	nonsynonymous SNV	GEMIN4:NM_015721:exon2:c.C2619A:p.H873Q	4.823	0.0241313	0.00619195	1.96244	25	4	1011	642	3.96884	1.37847	0.0108157	(0.3183772409729959, 2.4385718558626026)	0.917067	5	3	rs191778127	['snRNP Assembly', 'Metabolism of non-coding RNA', 'Metabolism of RNA']	0
32	chr21	46004062	46004062	T	A	COL6A1				0.023166	0.00059453	5.28412	24	0	1012	646	30.6403	3.42232	0.0166823	(0.6200460026493642, 6.224587327036799)	0.917067	5	3		['Collagen degradation', 'Degradation of the extracellular matrix', 'Extracellular matrix organization', 'Collagen formation', 'Signal Transduction', 'Collagen biosynthesis and modifying enzymes', 'Signaling by PDGF', 'Assembly of collagen fibrils and other multimeric structures', 'ECM proteoglycans', 'Collagen chain trimerization', 'Signaling by Receptor Tyrosine Kinases', 'Developmental Biology…	6
0	chr6	2623726	2623726	T	C	LINC01600			0.003	0.000965251	0.0123839	-3.68142	1	8	1035	638	0.0770531	-2.56326	0.0157807	(-4.644455251129713, -0.4820646769393164)	0.917067	5	3	rs201134793	-	-
78	chr7	73203446	73203446	A	G	GTF2IP1;GTF2IP4				0.0250965	0.00464396	2.43406	26	3	1010	643	5.51749	1.70792	0.00524669	(0.5087518208505439, 2.907094906660829)	0.917067	5	3	rs1637387	-	-
158	chr7	142488167	142488167	T	C	TCAF2				0.00482625	0.0263158	-2.44695	5	17	1031	629	0.179437	-1.71793	0.000778837	(-2.7199731350118976, -0.7158841828653721)	0.917067	5	3	rs56123853	-	-
115	chr3	187292013	187292013	-	TGTGTG	LOC101929130				0.0282258	0.00928793	1.60359	28	6	964	640	3.0982	1.13082	0.0125007	(0.24345205061852038, 2.0181917947621217)	0.917067	5	3	rs201264635	-	-
24	chr1	6179877	6179877	-	G	CHD5				0.134454	0.0431655	1.63916	64	12	412	266	3.44337	1.23645	0.000137215	(0.6009103571021511, 1.871988428905536)	0.917067	5	3	rs70981314	-	-
230	chr1	156135896	156135896	T	A	LMNA				0.0482625	0.00928793	2.37748	50	6	986	640	5.40906	1.68808	0.000104266	(0.8354496514044404, 2.540701064497907)	0.917067	5	3		['Apoptosis', 'Apoptotic cleavage of cellular proteins', 'Cell Cycle', 'Nuclear Envelope Breakdown', 'Breakdown of the nuclear lamina', 'Depolymerisation of the Nuclear Lamina', 'Programmed Cell Death', 'Mitotic Prophase', 'M Phase', 'Cell Cycle, Mitotic', 'Apoptotic execution phase', 'Disease', 'Cellular responses to stress', 'XBP1(S) activates chaperone genes', 'IRE1alpha activates chaperones',…	8
72	chr9	86341114	86341115	AA	-	TUT7				0.0260618	0.00773994	1.75154	27	5	1009	641	3.43053	1.23271	0.011788	(0.27335520556384496, 2.192071574710735)	0.917067	5	3	rs201019389	['Deadenylation-dependent mRNA decay', 'Deadenylation of mRNA', 'Metabolism of RNA']	-
147	chr9	137158540	137158540	A	T	GRIN1				0.0279923	0.00059453	5.55713	29	0	1007	646	37.2075	3.61651	0.0112797	(0.8191659109647889, 6.4138573322561285)	0.917067	5	3		['Neurotransmitter receptors and postsynaptic signal transmission', 'Transmission across Chemical Synapses', 'Neuronal System', 'Developmental Biology', 'Signal Transduction', 'EPH-Ephrin signaling', 'EPHB-mediated forward signaling', 'Axon guidance', 'Unblocking of NMDA receptors, glutamate binding and activation', 'Activation of NMDA receptors and postsynaptic events', 'RAF/MAP kinase cascade',…	15
96	chr4	182680666	182680666	G	C	TENM3	nonsynonymous SNV	TENM3:NM_001080477:exon10:c.G1763C:p.G588A	23.6	0.00772201	0.0325077	-2.07374	8	21	1028	625	0.23161	-1.4627	0.000474761	(-2.283060664611757, -0.6423387200328344)	0.917067	5	3	rs147269509	-	-
74	chr8	86905112	86905112	G	A	CNBD1	nonsynonymous SNV	CNBD1:NM_173538:exon3:c.G190A:p.D64N	0.007	0.000965251	0.0139319	-3.85134	1	9	1035	637	0.0683843	-2.68261	0.0110205	(-4.750951464280572, -0.6142717906464799)	0.917067	4	3	rs10504829	-	-
43	chr19	7640136	7640146	GTGTGTGCATC	0	STXBP2				0.0117417	0.0356037	-1.60039	12	23	1010	623	0.321825	-1.13375	0.00162353	(-1.8388076525750288, -0.4286856618029721)	0.917067	4	3		['Hemostasis', 'Platelet degranulation ', 'Cytokine Signaling in Immune system', 'Immune System', 'Signaling by Interleukins', 'Other interleukin signaling', 'Platelet activation, signaling and aggregation', 'Response to elevated platelet cytosolic Ca2+']	-
234	chr19	55187587	55187587	C	T	PTPRH	nonsynonymous SNV	PTPRH:NM_001161440:exon12:c.G1958A:p.G653D,PTPRH:NM_002842:exon14:c.G2492A:p.G831D	6.611	0.0328185	0.00928793	1.82108	34	6	1002	640	3.61943	1.28632	0.00390015	(0.41278101067587225, 2.1598508895181565)	0.917067	4	3	rs36092369	-	-
15	chr11	4924127	4924128	TG	-	OR51G1	frameshift deletion	OR51G1:NM_001005237:exon1:c.212_213del:p.T71Rfs*19		0.003861	0.0170279	-2.14085	4	11	1032	635	0.223749	-1.49723	0.0106252	(-2.6458638821767515, -0.3485958354778409)	0.917067	4	3	rs145179083	['Olfactory Signaling Pathway', 'Sensory Perception']	-
118	chr11	89973753	89973753	A	G	TRIM64	nonsynonymous SNV	TRIM64:NM_001136486:exon6:c.A1214G:p.Q405R	3.105	0.107656	0.03125	1.78449	45	8	373	248	3.73995	1.31907	0.000773774	(0.5500870909767371, 2.0880554582465636)	0.917067	4	3	rs4108238	-	-
125	chr11	102328858	102328858	-	TA	BIRC3				0.0222672	0.00483871	2.20223	22	3	966	617	4.68392	1.54414	0.0124133	(0.3336392862979163, 2.7546314224682367)	0.917067	4	3	rs60157696	['Apoptosis', 'Apoptotic cleavage of cellular proteins', 'Cytokine Signaling in Immune system', 'Signal Transduction', 'Toll Like Receptor 4 (TLR4) Cascade', 'MyD88-independent TLR4 cascade ', 'Innate Immune System', 'Immune System', 'Toll-like Receptor Cascades', 'Metabolism of proteins', 'RIPK1-mediated regulated necrosis', 'Regulated Necrosis', 'Programmed Cell Death', 'Regulation of TNFR1 sig…	3
40	chr13	99970426	99970426	G	0	ZIC5				0.012894	0.0524017	-2.02292	9	24	689	434	0.236212	-1.44303	0.000265017	(-2.2184718240018144, -0.6675801558481441)	0.917067	4	3		-	-
22	chr12	8390547	8390547	T	A	LINC00937				0.970874	0.99226	-0.0314345	1000	641	30	5	0.26001	-1.34703	0.00554651	(-2.2989657696379817, -0.39510152469519433)	0.917067	4	3	rs4403873	-	-
25	chr5	36995591	36995591	T	-	NIPBL				0.0279923	0.00928793	1.5916	29	6	1007	640	3.07183	1.12227	0.0128987	(0.2376696262097464, 2.006877662577402)	0.917067	4	3	rs754228338	['Cell Cycle', 'Cohesin Loading onto Chromatin', 'Mitotic Telophase/Cytokinesis', 'M Phase', 'Cell Cycle, Mitotic']	0
66	chr5	98883827	98883844	ATATATATATATATATAT	-	CHD1				0.011976	0.0354839	-1.56701	12	22	990	598	0.329477	-1.11025	0.00219854	(-1.8209098541341948, -0.39959013136244603)	0.917067	4	3	rs200375047	['Signal Transduction', 'ESR-mediated signaling', 'Signaling by Nuclear Receptors', 'Estrogen-dependent gene expression']	-
79	chr5	134608354	134608355	TT	-	SAR1B				0.0260618	0.00928793	1.48851	27	6	1009	640	2.85431	1.04883	0.0209209	(0.15870198740954955, 1.9389591181432175)	0.917067	4	3	rs199526981	['Adaptive Immune System', 'Immune System', 'ER to Golgi Anterograde Transport', 'Membrane Trafficking', 'COPII-mediated vesicle transport', 'Metabolism of proteins', 'Asparagine N-linked glycosylation', 'Vesicle-mediated transport', 'Cargo concentration in the ER', 'Post-translational protein modification', 'Transport to the Golgi and subsequent modification', 'Class I MHC mediated antigen proce…	5
124	chr5	178985702	178985702	A	-	GRM6				0.0299228	0.0108359	1.46542	31	7	1005	639	2.81578	1.03524	0.0140496	(0.20908381416495625, 1.861393564463426)	0.917067	4	3	rs878961833	['Signal Transduction', 'Signaling by GPCR', 'GPCR downstream signalling', 'G alpha (i) signalling events', 'Class C/3 (Metabotropic glutamate/pheromone receptors)', 'GPCR ligand binding']	7
26	chr20	33301377	33301377	T	C	BPIFB1	nonsynonymous SNV	BPIFB1:NM_033197:exon9:c.T892C:p.S298P	0.002	0.003861	0.0201238	-2.38186	4	13	1032	633	0.18873	-1.66744	0.00367296	(-2.7924507586959972, -0.5424262817819596)	0.917067	4	3	rs6120221	['Innate Immune System', 'Immune System', 'Antimicrobial peptides']	-
32	chr17	7495925	7495928	CTTT	-	POLR2A				0.0135135	0.0386997	-1.51792	14	25	1022	621	0.340274	-1.078	0.00141032	(-1.7398145486044627, -0.4161938195617628)	0.917067	4	3	rs3216887	['Formation of the Early Elongation Complex', 'RNA Polymerase II Pre-transcription Events', 'RNA Polymerase II Transcription', 'Gene expression (Transcription)', 'RNA Polymerase II Transcription Elongation', 'Formation of RNA Pol II elongation complex ', 'Signal Transduction', 'Signaling by FGFR', 'Gene Silencing by RNA', 'Generic Transcription Pathway', 'Transcriptional Regulation by TP53', 'Tra…	0
106	chr7	100088993	100088995	GGC	-	COPS6	nonframeshift deletion	COPS6:NM_006833:exon1:c.3_5del:p.A10del		0.0202703	0.00619195	1.7109	21	4	1015	642	3.32069	1.20017	0.0284797	(0.12636636809857094, 2.2739786095366403)	0.917067	4	3	rs769644738	['Membrane Trafficking', 'Metabolism of proteins', 'Vesicle-mediated transport', 'DNA Damage Recognition in GG-NER', 'Nucleotide Excision Repair', 'Global Genome Nucleotide Excision Repair (GG-NER)', 'Post-translational protein modification', 'Formation of TC-NER Pre-Incision Complex', 'Transcription-Coupled Nucleotide Excision Repair (TC-NER)', 'DNA Repair', 'Cargo recognition for clathrin-media…	10
8	chrY	11340737	11340737	T	G	TTTY23;GYG2P1				0.104061	0.262115	-1.33277	82	119	706	335	0.326969	-1.11789	1.54764e-12	(-1.4277863964999078, -0.807991506530996)	6.20623e-07	4	3	rs79087866	-	-
69	chr16	21404236	21404236	C	-	NPIPB3				0.862416	0.946565	-0.134317	257	248	41	14	0.353855	-1.03887	0.001258	(-1.6701526724127698, -0.40758212430485397)	0.917067	3	3	rs767458164	-	-
116	chr16	31754723	31754723	T	C	ZNF720				0.0318533	0.0108359	1.55562	33	7	1003	639	3.00342	1.09975	0.00870313	(0.27814940152877854, 1.9213527561247523)	0.917067	3	3	rs144456453	['Generic Transcription Pathway', 'RNA Polymerase II Transcription', 'Gene expression (Transcription)']	-
70	chr8	84804742	84804744	AAA	-	RALYL				0.0377176	0.0139319	1.43685	39	9	995	637	2.7742	1.02036	0.00626431	(0.2887773469460264, 1.751950627467967)	0.917067	3	3	rs148241211	-	-
84	chr8	107303234	107303234	T	C	ANGPT1				0.0318533	0.0139319	1.19305	33	9	1003	637	2.32868	0.845302	0.0258997	(0.10159685819842568, 1.5890068452825494)	0.917067	3	3	rs16876014	['Hemostasis', 'Signal Transduction', 'Cell surface interactions at the vascular wall', 'Tie2 Signaling', 'RAF/MAP kinase cascade', 'MAPK family signaling cascades', 'MAPK1/MAPK3 signaling']	1
27	chr19	4497181	4497181	C	T	HDGFL2				0.0164093	0.0448916	-1.45194	17	29	1019	617	0.354946	-1.03579	0.000824026	(-1.6427732976918001, -0.4288076928033896)	0.917067	3	3	rs146793578	-	-
105	chr11	85709358	85709358	G	A	SYTL2	nonsynonymous SNV	SYTL2:NM_001365831:exon2:c.C146T:p.A49V,SYTL2:NM_001365832:exon2:c.C146T:p.A49V,SYTL2:NM_001365834:exon3:c.C266T:p.A89V,SYTL2:NM_206930:exon3:c.C266T:p.A89V,SYTL2:NM_001162952:exon4:c.C179T:p.A60V,SYTL2:NM_001365828:exon4:c.C299T:p.A100V,SYTL2:NM_001365833:exon4:c.C266T:p.A89V,SYTL2:NM_001289610:exon5:c.C179T:p.A60V,SYTL2:NM_001365829:exon5:c.C299T:p.A100V,SYTL2:NM_001365830:exon5:c.C299T:p.A100V…	23.2	0.0289575	0.0108359	1.41812	30	7	1006	639	2.72224	1.00145	0.0178511	(0.17280562965489432, 1.8301030429944896)	0.917067	3	3	rs61740616	-	-
129	chr11	108134200	108134200	-	T	ACAT1				0.0366795	0.0139319	1.39658	38	9	998	637	2.69495	0.991378	0.00805917	(0.2580298286428868, 1.7247260946588425)	0.917067	3	3	rs747987434	['Metabolism', 'Metabolism of lipids', 'Branched-chain amino acid catabolism', 'Metabolism of amino acids and derivatives', 'Ketone body metabolism', 'Utilization of Ketone Bodies', 'Synthesis of Ketone Bodies']	-
24	chr13	44979969	44979969	-	A	NUFIP1				0.046332	0.0170279	1.44411	48	11	988	635	2.80456	1.03125	0.00228925	(0.3685327316621658, 1.693963346846522)	0.917067	3	3	rs754645264	-	-
113	chrX	85268269	85268272	TTTT	-	ZNF711				0.0428016	0.0170279	1.32977	44	11	984	635	2.5813	0.948293	0.00540983	(0.2800997227485751, 1.6164872031720825)	0.917067	3	3		['Generic Transcription Pathway', 'RNA Polymerase II Transcription', 'Gene expression (Transcription)']	25
4	chr15	20536924	20536924	G	A	GOLGA6L6				0.0342466	0.0916667	-1.42044	20	33	564	327	0.351386	-1.04587	0.000337758	(-1.6177430099562935, -0.4739957270702967)	0.917067	3	3		-	-
1	chr10	5099417	5099417	C	T	AKR1C3	nonsynonymous SNV	AKR1C3:NM_001253908:exon5:c.C538T:p.P180S,AKR1C3:NM_003739:exon5:c.C538T:p.P180S	23.3	0.0164093	0.00309598	2.40604	17	2	1019	644	5.37193	1.68119	0.0248412	(0.21270823225930635, 3.1496674804964933)	0.917067	3	3	rs34186955	['Metabolism', 'Synthesis of bile acids and bile salts', 'Synthesis of bile acids and bile salts via 7alpha-hydroxycholesterol', 'Synthesis of bile acids and bile salts via 24-hydroxycholesterol', 'Synthesis of bile acids and bile salts via 27-hydroxycholesterol', 'Bile acid and bile salt metabolism', 'Metabolism of vitamins and cofactors', 'Visual phototransduction', 'Metabolism of lipids', 'Met…	-
44	chr12	24903009	24903009	G	A	BCAT1				0.0144788	0.0356037	-1.29809	15	23	1021	623	0.397947	-0.921435	0.00606232	(-1.5794974057930307, -0.26337322261527196)	0.917067	3	3	rs74528004	['Metabolism', 'Branched-chain amino acid catabolism', 'Metabolism of amino acids and derivatives']	-
110	chr5	176060218	176060218	G	A	LOC100996385				0.0836066	0.211055	-1.33593	51	84	559	314	0.341043	-1.07575	1.78356e-08	(-1.4501275930631619, -0.7013677136685055)	0.000943012	3	3	rs201286084	-	-
60	chr22	32255319	32255319	G	A	SLC5A4	nonsynonymous SNV	SLC5A4:NM_014227:exon1:c.C11T:p.T4M	23.8	0.034749	0.0123839	1.48851	36	8	1000	638	2.871	1.05466	0.00745373	(0.2821630896863715, 1.8271577125914837)	0.917067	3	3	rs16990065	['Cellular hexose transport', 'Transport of small molecules', 'SLC-mediated transmembrane transport']	-
141	chr17	74344203	74344203	T	A	KIF19				0.0202703	0.00464396	2.12594	21	3	1015	643	4.43448	1.48941	0.0161674	(0.2756680734709025, 2.703153890163186)	0.917067	3	3		['Hemostasis', 'Kinesins', 'Factors involved in megakaryocyte development and platelet production', 'Membrane Trafficking', 'Vesicle-mediated transport', 'COPI-dependent Golgi-to-ER retrograde traffic', 'Intra-Golgi and retrograde Golgi-to-ER traffic', 'Golgi-to-ER retrograde transport']	-
1	chr21	5154647	5154647	T	C	LOC102724159;PWP2				0.194561	0.0780142	1.31841	93	22	385	260	2.85478	1.049	2.77815e-05	(0.5584136102645456, 1.5395770627808207)	0.564953	3	3		-	-
32	chr6	32038419	32038419	C	T	CYP21A2				0.154229	0.0601504	1.35843	62	16	340	250	2.84926	1.04706	0.000344379	(0.47372473263987347, 1.6203971934748247)	0.917067	3	3	rs6470	['Metabolism', 'Mineralocorticoid biosynthesis', 'Glucocorticoid biosynthesis', 'Metabolism of steroid hormones', 'Biological oxidations', 'Cytochrome P450 - arranged by substrate type', 'Phase I - Functionalization of compounds', 'Endogenous sterols', 'Metabolism of lipids', 'Metabolism of steroids', 'Disease', 'Defective CYP21A2 causes AH3', 'Metabolic disorders of biological oxidation enzymes'…	-
165	chr2	227028012	227028012	-	A	COL4A4				0.0289575	0.0108359	1.41812	30	7	1006	639	2.72224	1.00145	0.0178511	(0.17280562965489432, 1.8301030429944896)	0.917067	3	3	rs200823182	['Collagen degradation', 'Degradation of the extracellular matrix', 'Extracellular matrix organization', 'Collagen formation', 'Signal Transduction', 'Collagen biosynthesis and modifying enzymes', 'Signaling by PDGF', 'Assembly of collagen fibrils and other multimeric structures', 'Integrin cell surface interactions', 'Crosslinking of collagen fibrils', 'Laminin interactions', 'Non-integrin membr…	6
186	chr2	237990403	237990403	-	T	UBE2F-SCLY				0.0241313	0.00928793	1.37748	25	6	1011	640	2.63765	0.969889	0.0339705	(0.07339423125219968, 1.8663843946945842)	0.917067	3	3	rs759256844	-	-
122	chr1	50419102	50419107	CGGCGG	-	DMRTA2	nonframeshift deletion	DMRTA2:NM_032110:exon3:c.1187_1192del:p.A396_A397del		0.0877193	0.188406	-1.10288	20	26	208	112	0.414201	-0.881403	0.00583149	(-1.5079724225578666, -0.25483452318956334)	0.917067	3	3	rs4027495	-	-
135	chr1	65572291	65572294	TTTT	-	LEPR				0.028	0.00949367	1.56039	28	6	972	626	3.00549	1.10044	0.0150813	(0.21301258045692395, 1.9878666347166916)	0.917067	3	3		-	1
152	chr1	93571663	93571663	A	C	BCAR3				0.0260618	0.00928793	1.48851	27	6	1009	640	2.85431	1.04883	0.0209209	(0.15870198740954955, 1.9389591181432175)	0.917067	3	3	rs41292651	-	1
236	chr1	156881590	156881590	G	A	NTRK1	nonsynonymous SNV	NTRK1:NM_001012331:exon16:c.G2321A:p.R774Q,NTRK1:NM_001007792:exon17:c.G2231A:p.R744Q,NTRK1:NM_002529:exon17:c.G2339A:p.R780Q	10.14	0.00579151	0.0185759	-1.68142	6	12	1030	634	0.307767	-1.17841	0.019032	(-2.1633759412728044, -0.1934486734199975)	0.917067	3	3	rs35669708	['Signal Transduction', 'Signaling by NTRKs', 'Prolonged ERK activation events', 'Frs2-mediated activation', 'ARMS-mediated activation', 'Activation of TRKA receptors', 'Signaling by NTRK1 (TRKA)', 'TRKA activation by NGF', 'Signalling to ERKs', 'PI3K/AKT activation', 'Signaling by Receptor Tyrosine Kinases', 'Retrograde neurotrophin signalling', 'PLC-gamma1 signalling', 'Signalling to RAS', 'NGF…	1
242	chr1	161223056	161223069	CACACACACACACA	-	APOA2				0.0212355	0.00619195	1.77801	22	4	1014	642	3.48225	1.24768	0.0222791	(0.17774902187923636, 2.3176074016752786)	0.917067	3	3	rs776675749	['Metabolism', 'Plasma lipoprotein assembly, remodeling, and clearance', 'Metabolism of vitamins and cofactors', 'Visual phototransduction', 'Regulation of Insulin-like Growth Factor (IGF) transport and uptake by Insulin-like Growth Factor Binding Proteins (IGFBPs)', 'Transport of small molecules', 'Metabolism of proteins', 'Post-translational protein modification', 'Metabolism of fat-soluble vit…	5
304	chr1	231260466	231260466	A	G	GNPAT				0.00772201	0.0216718	-1.48877	8	14	1028	632	0.351306	-1.0461	0.0190215	(-1.9203893272613344, -0.17180435234601465)	0.917067	3	3	rs115603128	['Metabolism', 'Synthesis of PA', 'Glycerophospholipid biosynthesis', 'Phospholipid metabolism', 'Metabolism of lipids', 'Plasmalogen biosynthesis', 'Wax and plasmalogen biosynthesis', 'Peroxisomal protein import', 'Protein localization']	-
328	chr1	245015724	245015730	AAGAAAG	0	EFCAB2				0.0250965	0.00928793	1.43406	26	6	1010	640	2.74587	1.0101	0.0266579	(0.11690466390572174, 1.9032946067179588)	0.917067	3	3		-	-
101	chr9	122553878	122553878	C	T	OR1N2	nonsynonymous SNV	OR1N2:NM_001004457:exon1:c.C667T:p.R223C	19.53	0.0183398	0.00309598	2.56651	19	2	1017	644	6.01573	1.79438	0.0160291	(0.3340173179874051, 3.2547389393371726)	0.917067	3	3	rs41316976	['Olfactory Signaling Pathway', 'Sensory Perception']	-
11	chrY	11346124	11346124	T	A	TTTY23;GYG2P1				0.01	0.04	-2	7	14	693	336	0.242424	-1.41707	0.00244451	(-2.333660745426018, -0.5004712941472704)	0.917067	3	3	rs75977134	-	-
0	chr4	474024	474024	-	A	ABCA11P				0.0019305	0.0123839	-2.68142	2	8	1034	638	0.154255	-1.86915	0.0182984	(-3.4217722958947228, -0.3165199697922263)	0.917067	3	3	rs200778794	-	-
94	chr4	177439722	177439722	-	AGTTTTCAGAGGTTCATAGATTAAAAACATTGCTTTTCTCCAATCAATAGT	AGA				0.00482625	0.0170279	-1.81892	5	11	1031	635	0.279958	-1.27312	0.0187651	(-2.334856356377168, -0.21137733459990948)	0.917067	3	3		['Innate Immune System', 'Immune System', 'Neutrophil degranulation']	-
64	chr16	21199668	21199668	T	A	ZP2			24.8	0.0241313	0.00619195	1.96244	25	4	1011	642	3.96884	1.37847	0.0108157	(0.3183772409729959, 2.4385718558626026)	0.917067	5	2		['Fertilization', 'Reproduction', 'Interaction With Cumulus Cells And The Zona Pellucida']	-
159	chr16	84179928	84179928	C	T	TAF1C				0.0019305	0.0185759	-3.26638	2	12	1034	634	0.102192	-2.2809	0.00288335	(-3.781108957377021, -0.7806921823413866)	0.917067	5	2	rs186382482	['Epigenetic regulation of gene expression', 'Positive epigenetic regulation of rRNA expression', 'B-WICH complex positively regulates rRNA expression', 'RNA Polymerase I Transcription Initiation', 'RNA Polymerase I Promoter Escape', 'RNA Polymerase I Promoter Clearance', 'RNA Polymerase I Transcription Termination', 'RNA Polymerase I Transcription', 'Gene expression (Transcription)', 'SIRT1 nega…	0
164	chr16	85655794	85655794	T	A	GSE1	nonsynonymous SNV	GSE1:NM_001134473:exon5:c.T554A:p.L185Q,GSE1:NM_001278184:exon5:c.T647A:p.L216Q,GSE1:NM_014615:exon6:c.T866A:p.L289Q	24.6	0.0250965	0.00619195	2.01902	26	4	1010	642	4.13168	1.41868	0.00854202	(0.36137690869097905, 2.4759928328215164)	0.917067	5	2	rs747712438	-	-
22	chrX	10117542	10117542	G	A	WWC3	nonsynonymous SNV	WWC3:NM_015691:exon11:c.G1483A:p.A495T	2.289	0.00482625	0.0247678	-2.35949	5	16	1031	630	0.190955	-1.65572	0.00129991	(-2.6647776372174956, -0.6466533116566289)	0.917067	5	2	rs5934750	-	-
10	chr10	18536243	18536243	-	TTTTCTT	CACNB2				0.00690335	0.0249221	-1.85206	7	16	1007	626	0.271971	-1.30206	0.00429945	(-2.1958276772900853, -0.40829051231577873)	0.917067	5	2		['Presynaptic depolarization and calcium channel opening', 'Transmission across Chemical Synapses', 'Neuronal System', 'Metabolism', 'Integration of energy metabolism', 'Muscle contraction', 'Regulation of insulin secretion', 'Cardiac conduction', 'Phase 0 - rapid depolarisation', 'Phase 2 - plateau phase', 'Developmental Biology', 'NCAM signaling for neurite out-growth', 'Adrenaline,noradrenalin…	8
51	chr12	44776143	44776143	C	T	NELL2	nonsynonymous SNV	NELL2:NM_001145108:exon8:c.G770A:p.R257Q,NELL2:NM_001145109:exon8:c.G767A:p.R256Q,NELL2:NM_001145107:exon9:c.G920A:p.R307Q,NELL2:NM_001145110:exon9:c.G839A:p.R280Q,NELL2:NM_006159:exon9:c.G770A:p.R257Q	23.4	0.000965251	0.0170279	-4.14085	1	11	1035	635	0.0557751	-2.88643	0.00577429	(-4.935925319617693, -0.8369286395926028)	0.917067	5	2	rs111769386	['Developmental Biology', 'Signaling by ROBO receptors', 'Axon guidance', 'Regulation of commissural axon pathfinding by SLIT and ROBO', 'Nervous system development']	3
63	chr5	95498627	95498627	-	T	TTC37				0.0212355	0.00154799	3.77801	22	1	1014	645	13.9941	2.63863	0.00995148	(0.6321912759868402, 4.645077896019079)	0.917067	5	2	rs761285138	['Deadenylation-dependent mRNA decay', "mRNA decay by 3' to 5' exoribonuclease", 'Metabolism of RNA']	-
71	chr5	112783765	112783765	-	A	APC				0.0198413	0.00309598	2.68004	20	2	988	644	6.51822	1.8746	0.0116743	(0.4176675381814743, 3.331534704519588)	0.917067	5	2	rs777230341	['Apoptosis', 'Apoptotic cleavage of cellular proteins', 'Signal Transduction', 'Degradation of beta-catenin by the destruction complex', 'Signaling by WNT', 'Beta-catenin phosphorylation cascade', 'TCF dependent signaling in response to WNT', 'Deactivation of the beta-catenin transactivating complex', 'Metabolism of proteins', 'Programmed Cell Death', 'Deubiquitination', 'Ovarian tumor domain pr…	3
38	chr22	22687254	22687254	A	T	GGTLC2;MIR650				0.0337838	0.0108359	1.64051	35	7	1001	639	3.19181	1.16059	0.00539659	(0.34303936770835963, 1.9781358072844688)	0.917067	5	2	rs199561156	-	-
49	chr16	11915673	11915673	-	CCGCCG	GSPT1	nonframeshift insertion	GSPT1:NM_001130006:exon1:c.47_48insCGGCGG:p.G16_S17insGG,GSPT1:NM_002094:exon1:c.47_48insCGGCGG:p.G16_S17insGG		0.00490196	0.01875	-1.93546	5	12	1015	628	0.2578	-1.35557	0.0112392	(-2.403577707418938, -0.30756721730423986)	0.917067	4	2	rs3031121	['Metabolism of proteins', 'Eukaryotic Translation Termination', 'Translation', 'Metabolism of RNA', 'Nonsense-Mediated Decay (NMD)', 'Nonsense Mediated Decay (NMD) independent of the Exon Junction Complex (EJC)', 'Nonsense Mediated Decay (NMD) enhanced by the Exon Junction Complex (EJC)', 'Developmental Biology', 'Signaling by ROBO receptors', 'Axon guidance', 'Regulation of expression of SLITs …	4
77	chr16	22534316	22534438	TCAGCAGATGATAATATCAAGACACCTGCTGAGCGTCTGCGGGGGCCGCTTCCACCCTCAGCGGATGATAATCTCAAGACACCTTCCGAGCGTCAGCTCACTCCCCTTCCACCCTCAGCTCCA	0	NPIPB5				0.00767544	0.0282392	-1.87938	7	17	905	585	0.266168	-1.32363	0.00342239	(-2.209944123628986, -0.43730845930895734)	0.917067	4	2		-	-
22	chr8	10622795	10622795	C	T	RP1L1	nonsynonymous SNV	RP1L1:NM_178857:exon2:c.G407A:p.R136H	9.237	0.00289575	0.0185759	-2.68142	3	12	1033	634	0.153437	-1.87447	0.00379057	(-3.143477594306136, -0.6054581572984703)	0.917067	4	2	rs189960401	-	-
93	chr8	141158222	141158222	G	A	DENND3				0.023166	0.00464396	2.31858	24	3	1012	643	5.083	1.6259	0.00814187	(0.4216112383728938, 2.8301935937671936)	0.917067	4	2	rs117040253	['Membrane Trafficking', 'Vesicle-mediated transport', 'RAB GEFs exchange GTP for GDP on RABs', 'Rab regulation of trafficking']	11
25	chrX	16829642	16829642	A	G	TXLNG	nonsynonymous SNV	TXLNG:NM_001168683:exon3:c.A340G:p.I114V,TXLNG:NM_018360:exon5:c.A736G:p.I246V	3.207	0.0241313	0.00464396	2.37748	25	3	1011	643	5.30003	1.66771	0.00652459	(0.4660814157021813, 2.869344667132295)	0.917067	4	2	rs5969783	-	-
47	chrX	31968490	31968490	G	A	DMD	nonsynonymous SNV	DMD:NM_004011:exon17:c.C2440T:p.R814W,DMD:NM_004012:exon17:c.C2431T:p.R811W,DMD:NM_000109:exon45:c.C6439T:p.R2147W,DMD:NM_004006:exon45:c.C6463T:p.R2155W,DMD:NM_004009:exon45:c.C6451T:p.R2151W,DMD:NM_004010:exon45:c.C6094T:p.R2032W	25.3	0.0492278	0.0170279	1.53158	51	11	985	635	2.98892	1.09491	0.00113141	(0.43575080093179275, 1.7540766343613228)	0.917067	4	2	rs1800273	['Extracellular matrix organization', 'Non-integrin membrane-ECM interactions', 'Striated Muscle Contraction', 'Muscle contraction']	9
158	chrX	141907926	141907926	G	T	MAGEC1	nonsynonymous SNV	MAGEC1:NM_005462:exon4:c.G2522T:p.S841I	16.87	0.00772201	0.0263158	-1.76888	8	17	1028	629	0.287938	-1.24501	0.00392898	(-2.09117562926709, -0.3988463541150078)	0.917067	4	2	rs41299076	-	-
113	chr15	78586716	78586716	C	T	CHRNA5				0.003861	0.0170279	-2.14085	4	11	1032	635	0.223749	-1.49723	0.0106252	(-2.6458638821767515, -0.3485958354778409)	0.917067	4	2	rs55982512	['Neurotransmitter receptors and postsynaptic signal transmission', 'Transmission across Chemical Synapses', 'Neuronal System', 'Acetylcholine binding and downstream events', 'Presynaptic nicotinic acetylcholine receptors', 'Postsynaptic nicotinic acetylcholine receptors', 'Highly calcium permeable postsynaptic nicotinic acetylcholine receptors', 'Highly calcium permeable nicotinic acetylcholine …	-
34	chr5	58558101	58558101	C	T	LINC02108				0.00596421	0.0201238	-1.7545	6	13	1000	633	0.292154	-1.23047	0.0131374	(-2.2029201591122964, -0.25802933103059)	0.917067	4	2		-	-
80	chr5	134612642	134612659	AAAAAAAAAAAAAAAAAA	-	SAR1B				0.00539957	0.0201342	-1.89873	5	12	921	584	0.264206	-1.33103	0.0128352	(-2.3794371278420665, -0.2826184537198926)	0.917067	4	2		['Adaptive Immune System', 'Immune System', 'ER to Golgi Anterograde Transport', 'Membrane Trafficking', 'COPII-mediated vesicle transport', 'Metabolism of proteins', 'Asparagine N-linked glycosylation', 'Vesicle-mediated transport', 'Cargo concentration in the ER', 'Post-translational protein modification', 'Transport to the Golgi and subsequent modification', 'Class I MHC mediated antigen proce…	5
45	chr20	51524090	51524090	C	G	NFATC2	nonsynonymous SNV	NFATC2:NM_001136021:exon2:c.G91C:p.V31L,NFATC2:NM_001258292:exon2:c.G91C:p.V31L,NFATC2:NM_012340:exon2:c.G151C:p.V51L,NFATC2:NM_173091:exon2:c.G151C:p.V51L	10.63	0.00772201	0.0247678	-1.68142	8	16	1028	630	0.30642	-1.1828	0.00666579	(-2.037261329061756, -0.3283342853171968)	0.917067	4	2	rs140836558	['Downstream signaling events of B Cell Receptor (BCR)', 'Adaptive Immune System', 'Innate Immune System', 'Immune System', 'Calcineurin activates NFAT', 'Fc epsilon receptor (FCERI) signaling', 'FCERI mediated Ca+2 mobilization', 'CLEC7A (Dectin-1) induces NFAT activation', 'CLEC7A (Dectin-1) signaling', 'C-type lectin receptors (CLRs)', 'Signaling by the B Cell Receptor (BCR)', 'Generic Transcr…	1
87	chr17	36013285	36013285	C	T	CCL23	nonsynonymous SNV	CCL23:NM_005064:exon4:c.G326A:p.R109H,CCL23:NM_145898:exon4:c.G275A:p.R92H	11.78	0.00598802	0.0238854	-1.99597	6	15	996	613	0.246185	-1.40167	0.00390805	(-2.353757047573917, -0.4495890594711669)	0.917067	4	2	rs80219613	['Signal Transduction', 'Signaling by GPCR', 'Class A/1 (Rhodopsin-like receptors)', 'Peptide ligand-binding receptors', 'GPCR downstream signalling', 'G alpha (q) signalling events', 'G alpha (i) signalling events', 'Formyl peptide receptors bind formyl peptides and many other ligands', 'GPCR ligand binding']	7
129	chr17	61404808	61404808	C	-	TBX2				0.00579151	0.0216718	-1.90381	6	14	1030	632	0.262968	-1.33572	0.00647201	(-2.2972010349220033, -0.3742440600060507)	0.917067	4	2	rs201348033	-	-
25	chr18	47248312	47248314	GGC	-	SKOR2	nonframeshift deletion	SKOR2:NM_001278063:exon2:c.870_872del:p.P294del		0.0334302	0.00947867	1.8184	23	4	665	418	3.61429	1.28489	0.018462	(0.21608585572242367, 2.3537026376338983)	0.917067	4	2		-	2
61	chr3	112231317	112231317	T	A	SLC9C1				0.0106178	0.0356037	-1.74555	11	23	1025	623	0.290689	-1.2355	0.000842745	(-1.9608673320571417, -0.510133299774528)	0.917067	4	2	rs75242433	['Stimuli-sensing channels', 'Transport of small molecules', 'Ion channel transport']	-
77	chr3	126007219	126007219	T	C	SLC41A3	nonsynonymous SNV	SLC41A3:NM_001008486:exon10:c.A1153G:p.I385V,SLC41A3:NM_001008487:exon10:c.A1183G:p.I395V,SLC41A3:NM_001164475:exon10:c.A910G:p.I304V,SLC41A3:NM_001008485:exon11:c.A1261G:p.I421V,SLC41A3:NM_017836:exon11:c.A1261G:p.I421V	11.16	0.00482625	0.0170279	-1.81892	5	11	1031	635	0.279958	-1.27312	0.0187651	(-2.334856356377168, -0.21137733459990948)	0.917067	4	2	rs79696429	-	-
2	chr14	18977428	18977428	A	C	LOC100508046				0.00835655	0.0255906	-1.61463	6	13	712	495	0.320873	-1.13671	0.022189	(-2.1108228638817357, -0.16259721027179963)	0.917067	4	2	rs201575309	-	-
176	chr2	231791726	231791726	T	C	COPS7B				0.0250965	0.00773994	1.69709	26	5	1010	641	3.3002	1.19398	0.0150122	(0.2317784816338323, 2.1561864637116614)	0.917067	4	2	rs115875756	['Membrane Trafficking', 'Metabolism of proteins', 'Vesicle-mediated transport', 'Nucleotide Excision Repair', 'Post-translational protein modification', 'Formation of TC-NER Pre-Incision Complex', 'Transcription-Coupled Nucleotide Excision Repair (TC-NER)', 'DNA Repair', 'Cargo recognition for clathrin-mediated endocytosis', 'Clathrin-mediated endocytosis', 'Neddylation', 'DNA Damage Recognition…	10
312	chr1	235677195	235677195	G	T	LYST				0.00772201	0.0216718	-1.48877	8	14	1028	632	0.351306	-1.0461	0.0190215	(-1.9203893272613344, -0.17180435234601465)	0.917067	4	2	rs72761794	-	-
19	chrY	11351008	11351008	T	A	TTTY23;GYG2P1				0.0302198	0.100529	-1.73405	22	38	706	340	0.278813	-1.27721	3.67356e-06	(-1.817992721451274, -0.736433931050934)	0.129487	4	2	rs79119321	-	-
62	chr16	20682341	20682341	C	G	ACSM1	nonsynonymous SNV	ACSM1:NM_052956:exon3:c.G526C:p.A176P,ACSM1:NM_001318890:exon4:c.G526C:p.A176P	23.8	0.023166	0.00928793	1.31858	24	6	1012	640	2.52964	0.928079	0.0432814	(0.028021962574456882, 1.828135412677938)	0.917067	3	2	rs61740631	['Metabolism', 'Phase II - Conjugation of compounds', 'Amino Acid conjugation', 'Conjugation of carboxylic acids', 'Conjugation of benzoate with glycine', 'Conjugation of phenylacetate with glutamine', 'Biological oxidations']	-
81	chr16	23641204	23641204	C	T	PALB2				0.027027	0.0108359	1.31858	28	7	1008	639	2.53571	0.930475	0.028793	(0.09633063535497477, 1.7646200983772466)	0.917067	3	2	rs8053188	['HDR through Homologous Recombination (HRR)', 'DNA Double-Strand Break Repair', 'Resolution of D-Loop Structures', 'Homology Directed Repair', 'HDR through Homologous Recombination (HRR) or Single Strand Annealing (SSA)', 'Resolution of D-loop Structures through Holliday Junction Intermediates', 'Homologous DNA Pairing and Strand Exchange', 'DNA Repair', 'Disease', 'Resolution of D-loop Structur…	0
26	chr8	11801942	11801942	G	C	FDFT1				0.003861	0.0154799	-2.00335	4	10	1032	636	0.246512	-1.40035	0.0183504	(-2.5640784552165203, -0.2366137739345615)	0.917067	3	2	rs187400157	['Metabolism', 'Cholesterol biosynthesis', 'Metabolism of lipids', 'Metabolism of steroids', 'Regulation of cholesterol biosynthesis by SREBP (SREBF)', 'PPARA activates gene expression', 'Activation of gene expression by SREBF (SREBP)', 'Regulation of lipid metabolism by PPARalpha']	-
98	chr8	143933187	143933187	C	G	PLEC				0.0212355	0.00619195	1.77801	22	4	1014	642	3.48225	1.24768	0.0222791	(0.17774902187923636, 2.3176074016752786)	0.917067	3	2		['Apoptosis', 'Apoptotic cleavage of cellular proteins', 'Extracellular matrix organization', 'Collagen formation', 'Cell-Cell communication', 'Assembly of collagen fibrils and other multimeric structures', 'Caspase-mediated cleavage of cytoskeletal proteins', 'Type I hemidesmosome assembly', 'Cell junction organization', 'Programmed Cell Death', 'Apoptotic execution phase']	3
45	chr11	33699568	33699568	C	T	C11orf91				0.0106178	0.0309598	-1.54391	11	20	1025	626	0.335902	-1.09093	0.00397614	(-1.833350005023893, -0.3485190374321687)	0.917067	3	2	rs76438225	-	-
54	chr11	47690268	47690268	A	G	AGBL2	nonsynonymous SNV	AGBL2:NM_024783:exon10:c.T1439C:p.L480P	27.2	0.00675676	0.0201238	-1.5745	7	13	1029	633	0.33124	-1.10491	0.0191143	(-2.029075206378601, -0.18074783781359283)	0.917067	3	2	rs76215382	['Metabolism of proteins', 'Post-translational protein modification', 'Carboxyterminal post-translational modifications of tubulin']	-
91	chr11	70826492	70826492	C	T	SHANK2				0.0183398	0.00464396	1.98155	19	3	1017	643	4.00426	1.38736	0.0260258	(0.16571265521014578, 2.609005382164633)	0.917067	3	2	rs146204677	['Neuronal System', 'Neurexins and neuroligins', 'Protein-protein interactions at synapses']	3
74	chrX	50310738	50310738	A	C	CCNB3	nonsynonymous SNV	CCNB3:NM_033031:exon6:c.A2569C:p.K857Q	9.37	0.0019305	0.0170279	-3.14085	2	11	1034	635	0.111658	-2.19231	0.00442947	(-3.7021865288265707, -0.6824397680016454)	0.917067	3	2	rs139478498	-	3
54	chr15	41570700	41570700	-	AGAGTTTGGTTCAGTGCGGGAGGCCCAGC	TYRO3				0.0212355	0.00619195	1.77801	22	4	1014	642	3.48225	1.24768	0.0222791	(0.17774902187923636, 2.3176074016752786)	0.917067	3	2	rs746533465	-	-
129	chr10	124021236	124021236	-	GGG	CHST15	nonframeshift insertion	CHST15:NM_001270765:exon6:c.1366_1367insCCC:p.P455_R456insP,CHST15:NM_014863:exon6:c.1366_1367insCCC:p.P455_R456insP		0.003861	0.0139319	-1.85134	4	9	1032	637	0.274332	-1.29341	0.0319652	(-2.4753393581234224, -0.11148965524792609)	0.917067	3	2		['Metabolism', 'Glycosaminoglycan metabolism', 'Chondroitin sulfate/dermatan sulfate metabolism', 'Chondroitin sulfate biosynthesis', 'Metabolism of carbohydrates']	6
138	chr10	133186142	133186142	C	T	KNDC1	nonsynonymous SNV	KNDC1:NM_152643:exon6:c.C794T:p.T265I	4.336	0.0106178	0.0325077	-1.6143	11	21	1025	625	0.319396	-1.14132	0.00237868	(-1.8775599438057995, -0.40508686971652086)	0.917067	3	2	rs34697182	-	-
12	chr12	6724297	6724297	G	A	COPS7A				0.0106178	0.0309598	-1.54391	11	20	1025	626	0.335902	-1.09093	0.00397614	(-1.833350005023893, -0.3485190374321687)	0.917067	3	2	rs79706212	['Membrane Trafficking', 'Metabolism of proteins', 'Vesicle-mediated transport', 'DNA Damage Recognition in GG-NER', 'Nucleotide Excision Repair', 'Global Genome Nucleotide Excision Repair (GG-NER)', 'Post-translational protein modification', 'Formation of TC-NER Pre-Incision Complex', 'Transcription-Coupled Nucleotide Excision Repair (TC-NER)', 'DNA Repair', 'Cargo recognition for clathrin-media…	10
92	chr12	100157634	100157634	G	A	GOLGA2P5				0.00059453	0.0108359	-4.18793	0	7	1036	639	0.0440568	-3.12228	0.0330346	(-5.993062144445521, -0.2514884516687834)	0.917067	3	2	rs144056555	-	-
24	chr20	33169148	33169148	G	A	BPIFA2	startloss	BPIFA2:NM_001319164:exon2:c.G3A:p.M1I,BPIFA2:NM_080574:exon2:c.G3A:p.M1I	28.6	0.003861	0.0170279	-2.14085	4	11	1032	635	0.223749	-1.49723	0.0106252	(-2.6458638821767515, -0.3485958354778409)	0.917067	3	2	rs17124277	['Innate Immune System', 'Immune System', 'Antimicrobial peptides']	-
61	chr22	32483863	32483866	TTAA	-	FBXO7				0.0222008	0.00619195	1.84214	23	4	1013	642	3.64413	1.29312	0.0174681	(0.22673942486679555, 2.3594938836342783)	0.917067	3	2	rs559606392	['Adaptive Immune System', 'Immune System', 'Metabolism of proteins', 'Post-translational protein modification', 'Neddylation', 'Antigen processing: Ubiquitination & Proteasome degradation', 'Class I MHC mediated antigen processing & presentation']	10
64	chr17	19681658	19681658	C	T	SLC47A2	nonsynonymous SNV	SLC47A2:NM_001099646:exon14:c.G1177A:p.G393R,SLC47A2:NM_152908:exon14:c.G1285A:p.G429R,SLC47A2:NM_001256663:exon15:c.G1219A:p.G407R	24.3	0.00772201	0.0232198	-1.58831	8	15	1028	631	0.327367	-1.11667	0.0112829	(-1.9804465495641133, -0.252899936228429)	0.917067	3	2	rs34399035	['Transport of small molecules', 'Transport of bile salts and organic acids, metal ions and amine compounds', 'SLC-mediated transmembrane transport']	-
163	chr17	82096465	82096465	C	T	FASN				0.00579151	0.0170279	-1.55589	6	11	1030	635	0.336275	-1.08982	0.0326124	(-2.0894477042967514, -0.09020206750585924)	0.917067	3	2	rs201311256	['Metabolism', 'Integration of energy metabolism', 'ChREBP activates metabolic gene expression', 'Metabolism of water-soluble vitamins and cofactors', 'Metabolism of vitamins and cofactors', 'Vitamin B5 (pantothenate) metabolism', 'Metabolism of lipids', 'Fatty acyl-CoA biosynthesis', 'Fatty acid metabolism', 'Signal Transduction', 'Regulation of cholesterol biosynthesis by SREBP (SREBF)', 'Activ…	-
52	chr6	47680297	47680297	A	G	ADGRF2	nonsynonymous SNV	ADGRF2:NM_001368115:exon5:c.A698G:p.K233R,ADGRF2:NM_153839:exon6:c.A494G:p.K165R	11.3	0.00772201	0.0216718	-1.48877	8	14	1028	632	0.351306	-1.0461	0.0190215	(-1.9203893272613344, -0.17180435234601465)	0.917067	3	2	rs115905625	-	-
97	chr6	132608453	132608453	C	G	TAAR3P				0.00675676	0.0201238	-1.5745	7	13	1029	633	0.33124	-1.10491	0.0191143	(-2.029075206378601, -0.18074783781359283)	0.917067	3	2	rs3813353	['Signal Transduction', 'Disease', 'Signaling by GPCR', 'Class A/1 (Rhodopsin-like receptors)', 'Amine ligand-binding receptors', 'GPCR downstream signalling', 'G alpha (s) signalling events', 'GPCR ligand binding', 'Infectious disease', 'Leishmania infection', 'ADORA2B mediated anti-inflammatory cytokines production', 'Anti-inflammatory response favouring Leishmania parasite infection', 'Leishma…	-
107	chr3	172710939	172710939	C	T	NCEH1	nonsynonymous SNV	NCEH1:NM_001146276:exon1:c.G46A:p.A16T,NCEH1:NM_020792:exon1:c.G46A:p.A16T	32	0.0202703	0.00464396	2.12594	21	3	1015	643	4.43448	1.48941	0.0161674	(0.2756680734709025, 2.703153890163186)	0.917067	3	2	rs138242499	['Plasma lipoprotein assembly, remodeling, and clearance', 'Transport of small molecules', 'LDL clearance', 'Plasma lipoprotein clearance']	12
118	chr3	195325414	195325414	-	T	ACAP2				0.0213592	0.00619195	1.78639	22	4	1008	642	3.50298	1.25361	0.0216516	(0.18367321931217062, 2.3235526752819737)	0.917067	3	2		-	-
56	chr2	71513767	71513767	C	A	DYSF	nonsynonymous SNV	DYSF:NM_001130455:exon6:c.C512A:p.A171E,DYSF:NM_001130976:exon6:c.C509A:p.A170E,DYSF:NM_001130977:exon6:c.C509A:p.A170E,DYSF:NM_001130978:exon6:c.C509A:p.A170E,DYSF:NM_001130983:exon6:c.C512A:p.A171E,DYSF:NM_001130984:exon6:c.C512A:p.A171E,DYSF:NM_001130986:exon6:c.C512A:p.A171E,DYSF:NM_003494:exon6:c.C509A:p.A170E,DYSF:NM_001130979:exon7:c.C602A:p.A201E,DYSF:NM_001130980:exon7:c.C602A:p.A201E,DY…	14.91	0.0222008	0.00619195	1.84214	23	4	1013	642	3.64413	1.29312	0.0174681	(0.22673942486679555, 2.3594938836342783)	0.917067	3	2	rs34999029	['Muscle contraction', 'Smooth Muscle Contraction']	34
185	chr1	146126370	146126370	A	T	NBPF10	nonsynonymous SNV	NBPF10:NM_001039703:exon14:c.T1892A:p.V631D,NBPF10:NM_001302371:exon14:c.T1892A:p.V631D		0.00772201	0.0216718	-1.48877	8	14	1028	632	0.351306	-1.0461	0.0190215	(-1.9203893272613344, -0.17180435234601465)	0.917067	3	2		-	-
188	chr1	146321939	146321939	G	A	NUDT4B;PPIAL4H				0.0203488	0.00619195	1.71648	21	4	1011	642	3.33383	1.20412	0.0279629	(0.13030806816361062, 2.277934254382433)	0.917067	3	2		-	-
225	chr1	155520360	155520365	AAAAAA	-	ASH1L				0.0036855	0.0166052	-2.1717	3	9	811	533	0.219071	-1.51836	0.023231	(-2.829564076179564, -0.20715376105579208)	0.917067	3	2		['PKMTs methylate histone lysines', 'Chromatin modifying enzymes', 'Chromatin organization']	-
251	chr1	167435277	167435277	C	G	CD247				0.0212766	0.00619195	1.7808	22	4	1012	642	3.48913	1.24965	0.0220686	(0.17971985735999008, 2.3195852348019605)	0.917067	3	2	rs55696551	['Adaptive Immune System', 'Innate Immune System', 'Immune System', 'Immunoregulatory interactions between a Lymphoid and a non-Lymphoid cell', 'TCR signaling', 'Phosphorylation of CD3 and TCR zeta chains', 'Translocation of ZAP-70 to Immunological synapse', 'Generation of second messenger molecules', 'Fcgamma receptor (FCGR) dependent phagocytosis', 'FCGR activation', 'Regulation of actin dynami…	1
2	chr4	868575	868575	C	A	GAK	nonsynonymous SNV	GAK:NM_001318134:exon17:c.G2122T:p.D708Y,GAK:NM_005255:exon20:c.G2359T:p.D787Y	24.1	0.00675676	0.0201238	-1.5745	7	13	1029	633	0.33124	-1.10491	0.0191143	(-2.029075206378601, -0.18074783781359283)	0.917067	3	2	rs34585705	['Membrane Trafficking', 'trans-Golgi Network Vesicle Budding', 'Golgi Associated Vesicle Biogenesis', 'Vesicle-mediated transport', 'Clathrin-mediated endocytosis']	5
2	chr16	280661	280661	-	G	ARHGDIG				0.757576	0.611111	0.309955	100	22	32	14	1.98864	0.687449	0.083856	(-0.09194923463470628, 1.4668475535253216)	0.917067	2	2	rs555058408	['Signal Transduction', 'Signaling by Rho GTPases', 'RHO GTPase cycle', 'RHOB GTPase cycle', 'CDC42 GTPase cycle', 'RHOH GTPase cycle', 'RHOG GTPase cycle', 'Signaling by Rho GTPases, Miro GTPases and RHOBTB3']	-
44	chr16	8776513	8776513	G	C	ABAT				0.027027	0.0108359	1.31858	28	7	1008	639	2.53571	0.930475	0.028793	(0.09633063535497477, 1.7646200983772466)	0.917067	2	2	rs778112323	['Neurotransmitter release cycle', 'Transmission across Chemical Synapses', 'Neuronal System', 'GABA synthesis, release, reuptake and degradation', 'Degradation of GABA']	-
75	chr16	22534056	22534113	CTCCACCCTCAGCGGATGATAATCTCAAGACACGTGCCGAGTGTCTGCTCCATCCCCT	0	NPIPB5				0.00773694	0.0185759	-1.26359	8	12	1026	634	0.411956	-0.886839	0.0534614	(-1.7868986864356873, 0.013220327632380902)	0.917067	2	2		-	-
97	chr16	30035442	30035442	A	C	TLCD3B	nonsynonymous SNV	TLCD3B:NM_001352173:exon2:c.T292G:p.F98V	10.73	0.027027	0.0108359	1.31858	28	7	1008	639	2.53571	0.930475	0.028793	(0.09633063535497477, 1.7646200983772466)	0.917067	2	2	rs77730873	-	2
120	chr16	46500740	46500740	C	T	ANKRD26P1				0.00772201	0.0201238	-1.38186	8	13	1028	633	0.378928	-0.970408	0.0318715	(-1.8566835687118217, -0.08413211059344783)	0.917067	2	2	rs112527425	-	-
128	chr16	58675347	58675348	AA	-	SLC38A7				0.040619	0.0139319	1.54376	42	9	992	637	2.99664	1.09749	0.00307909	(0.3707213029430667, 1.8242618755258118)	0.917067	2	2	rs775717511	-	-
8	chr8	7771501	7771501	A	C	FAM90A10P				0.0441501	0.0194346	1.18379	40	11	866	555	2.33046	0.846067	0.0141272	(0.1703326665205912, 1.5218021064785385)	0.917067	2	2	rs62640753	-	-
12	chr8	7971779	7971779	A	G	USP17L8	nonsynonymous SNV	USP17L8:NM_001256872:exon1:c.T1475C:p.M492T	3.419	0.8	0.906977	-0.181066	88	78	22	8	0.410256	-0.890973	0.0434324	(-1.755667396156344, -0.02627845162338638)	0.917067	2	2	rs779916075	['Metabolism of proteins', 'Deubiquitination', 'Ub-specific processing proteases', 'Post-translational protein modification']	-
49	chr8	26748751	26748753	AAA	-	ADRA1A				0.0313765	0.0123839	1.34122	31	8	957	638	2.58333	0.949081	0.0176126	(0.1654125523233695, 1.7327485570709231)	0.917067	2	2		['Signal Transduction', 'Signaling by GPCR', 'Class A/1 (Rhodopsin-like receptors)', 'Amine ligand-binding receptors', 'GPCR downstream signalling', 'Adrenoceptors', 'G alpha (q) signalling events', 'G alpha (12/13) signalling events', 'GPCR ligand binding']	7
60	chr8	43167924	43167925	TT	-	HGSNAT				0.00907258	0.0232198	-1.35577	9	15	983	631	0.385148	-0.954129	0.0246698	(-1.7865481242629098, -0.12170963848097771)	0.917067	2	2	rs756256599	['Metabolism', 'Glycosaminoglycan metabolism', 'Heparan sulfate/heparin (HS-GAG) metabolism', 'Innate Immune System', 'Immune System', 'HS-GAG degradation', 'Neutrophil degranulation', 'Metabolism of carbohydrates', 'Disease', 'Mucopolysaccharidoses', 'MPS IIIC - Sanfilippo syndrome C', 'Diseases of carbohydrate metabolism', 'Diseases of metabolism']	-
50	chr19	7730841	7730841	T	A	CLEC4G	nonsynonymous SNV	CLEC4G:NM_001244856:exon5:c.A266T:p.Q89L,CLEC4G:NM_198492:exon5:c.A302T:p.Q101L	7.103	0.00772201	0.0201238	-1.38186	8	13	1028	633	0.378928	-0.970408	0.0318715	(-1.8566835687118217, -0.08413211059344783)	0.917067	2	2	rs36064197	['Adaptive Immune System', 'Immune System', 'Immunoregulatory interactions between a Lymphoid and a non-Lymphoid cell']	-
122	chr19	22976598	22976598	T	C	ZNF728	nonsynonymous SNV	ZNF728:NM_001267716:exon4:c.A739G:p.K247E	13.37	0.0289575	0.0108359	1.41812	30	7	1006	639	2.72224	1.00145	0.0178511	(0.17280562965489432, 1.8301030429944896)	0.917067	2	2	rs2116933	-	-
130	chr19	33212664	33212664	C	T	SLC7A10				0.0144788	0.0356037	-1.29809	15	23	1021	623	0.397947	-0.921435	0.00606232	(-1.5794974057930307, -0.26337322261527196)	0.917067	2	2	rs56100350	['Hemostasis', 'Cell surface interactions at the vascular wall', 'Basigin interactions', 'Amino acid transport across the plasma membrane', 'Transport of small molecules', 'Transport of inorganic cations/anions and amino acids/oligopeptides', 'SLC-mediated transmembrane transport']	28
134	chr19	34341350	34341350	A	G	KIAA0355				0.00965251	0.0247678	-1.35949	10	16	1026	630	0.383772	-0.957707	0.0184099	(-1.7539974382965955, -0.16141623288514773)	0.917067	2	2	rs118136404	['Signal Transduction', 'Signaling by Rho GTPases', 'RHO GTPase cycle', 'RAC1 GTPase cycle', 'RAC2 GTPase cycle', 'RHOG GTPase cycle', 'RAC3 GTPase cycle', 'Signaling by Rho GTPases, Miro GTPases and RHOBTB3']	-
196	chr19	48360179	48360179	G	A	TMEM143				0.0260618	0.0123839	1.07347	27	8	1009	638	2.13404	0.758019	0.0617057	(-0.03714610921538719, 1.5531832838467374)	0.917067	2	2	rs62619940	-	-
200	chr19	49181329	49181329	T	A	TRPM4				0.0550193	0.0216718	1.34412	57	14	979	632	2.62834	0.966352	0.00140641	(0.3732361465661813, 1.5594672331050972)	0.917067	2	2	rs11668638	['Stimuli-sensing channels', 'TRP channels', 'Transport of small molecules', 'Ion channel transport']	-
216	chr19	52384821	52384821	-	ATCATGAGGTCAGGAGATCGAGACCATCCTGGCTAACAAGGTGAAACC	ZNF880	stopgain	ZNF880:NM_001145434:exon4:c.1241_1242insATCATGAGGTCAGGAGATCGAGACCATCCTGGCTAACAAGGTGAAACC:p.K415_R577delinsS		0.015444	0.0371517	-1.26638	16	24	1020	622	0.406536	-0.900083	0.00587294	(-1.5404688017220391, -0.25969704157256357)	0.917067	2	2		-	-
245	chr19	57858894	57858894	G	A	ZNF587	nonsynonymous SNV	ZNF587:NM_001204817:exon3:c.G479A:p.R160H,ZNF587:NM_032828:exon3:c.G482A:p.R161H	17.21	0.0125483	0.0309598	-1.30291	13	20	1023	626	0.397752	-0.921927	0.0104096	(-1.6272367329674904, -0.2166178889204724)	0.917067	2	2	rs143709083	['Generic Transcription Pathway', 'RNA Polymerase II Transcription', 'Gene expression (Transcription)']	2
17	chr11	5643454	5643454	T	G	TRIM34;TRIM6-TRIM34	nonsynonymous SNV	TRIM34:NM_001003827:exon8:c.T1212G:p.N404K,TRIM34:NM_021616:exon8:c.T1212G:p.N404K,TRIM6-TRIM34:NM_001003819:exon14:c.T2274G:p.N758K	12.05	0.0318533	0.0139319	1.19305	33	9	1003	637	2.32868	0.845302	0.0258997	(0.10159685819842568, 1.5890068452825494)	0.917067	2	2	rs16933844	-	-
48	chr11	45904204	45904204	G	A	MAPK8IP1				0.0318533	0.0139319	1.19305	33	9	1003	637	2.32868	0.845302	0.0258997	(0.10159685819842568, 1.5890068452825494)	0.917067	2	2	rs148381852	-	3
58	chr11	55994391	55994391	G	A	OR5F1	nonsynonymous SNV	OR5F1:NM_003697:exon1:c.C235T:p.P79S	24.1	0.00579151	0.0170279	-1.55589	6	11	1030	635	0.336275	-1.08982	0.0326124	(-2.0894477042967514, -0.09020206750585924)	0.917067	2	2	rs144123172	['Olfactory Signaling Pathway', 'Sensory Perception']	-
26	chr13	49555496	49555496	G	A	RCBTB1				0.00868726	0.0201238	-1.21193	9	13	1027	633	0.42671	-0.851652	0.0510799	(-1.7073002760682288, 0.003997140248829356)	0.917067	2	2	rs139163191	-	-
6	chrX	3272305	3272305	T	C	LINC01546				0.003861	0.0154799	-2.00335	4	10	1032	636	0.246512	-1.40035	0.0183504	(-2.5640784552165203, -0.2366137739345615)	0.917067	2	2	rs188286753	-	-
8	chrX	6533888	6533888	C	T	VCX3A	nonsynonymous SNV	VCX3A:NM_016379:exon3:c.G418A:p.V140M	5.409	0.0166667	0.00311526	2.41954	17	2	1003	640	5.42373	1.69078	0.0240318	(0.22227075841584898, 3.1592963453602554)	0.917067	2	2	rs72609545	-	-
35	chrX	22098038	22098038	G	A	PHEX				0.0368217	0.0154799	1.25016	38	10	994	636	2.43139	0.888462	0.0133348	(0.1847994501397514, 1.5921253966920241)	0.917067	2	2	rs142673941	-	-
57	chrX	47247952	47247953	AA	-	USP11				0.0637066	0.0247678	1.36298	66	16	970	630	2.67912	0.98549	0.000504467	(0.4301944243410406, 1.5407851110085469)	0.917067	2	2	rs755521571	['Metabolism of proteins', 'Deubiquitination', 'Ub-specific processing proteases', 'Post-translational protein modification', 'Chaperonin-mediated protein folding', 'Association of TriC/CCT with target proteins during biosynthesis', 'Protein folding']	-
66	chrX	49067849	49067849	T	A	CCDC120	nonsynonymous SNV	CCDC120:NM_001163321:exon10:c.T1735A:p.S579T,CCDC120:NM_001163322:exon10:c.T1594A:p.S532T,CCDC120:NM_001163323:exon10:c.T1594A:p.S532T,CCDC120:NM_001271835:exon10:c.T1630A:p.S544T,CCDC120:NM_001271836:exon10:c.T1630A:p.S544T,CCDC120:NM_033626:exon10:c.T1630A:p.S544T	0.001	0.0173745	0.00464396	1.90354	18	3	1018	643	3.78978	1.33231	0.033212	(0.10607555093268495, 2.5585424417777265)	0.917067	2	2		-	-
88	chrX	67545332	67545332	G	0	AR				0.0261628	0.0712074	-1.44451	27	46	1005	600	0.350422	-1.04862	2.33097e-05	(-1.5344273348533932, -0.5628080566701985)	0.492977	2	2		['Signal Transduction', 'Signaling by Rho GTPases', 'RHO GTPase Effectors', 'Generic Transcription Pathway', 'Cellular responses to stress', 'SUMOylation', 'SUMO E3 ligases SUMOylate target proteins', 'HSP90 chaperone cycle for steroid hormone receptors (SHR) in the presence of ligand', 'Nuclear Receptor transcription pathway', 'Metabolism of proteins', 'SUMOylation of intracellular receptors', '…	2
166	chrX	151954912	151954912	G	A	GABRE	nonsynonymous SNV	GABRE:NM_004961:exon9:c.C1310T:p.P437L	15.81	0.0415058	0.0185759	1.15988	43	12	993	634	2.28785	0.827612	0.0122531	(0.18001200186633481, 1.475211510728895)	0.917067	2	2	rs45439991	-	-
179	chrX	156023443	156023443	G	A	WASIR1;DDX11L16				0.0256674	0.0571429	-1.15464	25	36	949	594	0.434668	-0.833173	0.00170352	(-1.3536344516648258, -0.3127107340055588)	0.917067	2	2	rs764194470	-	-
14	chr15	22539121	22539121	C	T	HERC2	unknown	UNKNOWN		0.012605	0.0296167	-1.23241	12	17	940	557	0.418273	-0.871621	0.0220873	(-1.617994618988968, -0.12524804022099534)	0.917067	2	2	rs199634224	['Adaptive Immune System', 'Immune System', 'DNA Double-Strand Break Repair', 'Recruitment and ATM-mediated phosphorylation of repair and signaling proteins at DNA double strand breaks', 'DNA Double Strand Break Response', 'DNA Repair', 'Antigen processing: Ubiquitination & Proteasome degradation', 'Class I MHC mediated antigen processing & presentation', 'Cell Cycle', 'SUMOylation', 'SUMOylation…	0
75	chr15	49972642	49972642	C	T	ATP8B4	nonsynonymous SNV	ATP8B4:NM_024837:exon13:c.G1183A:p.G395S	29.6	0.00482625	0.0170279	-1.81892	5	11	1031	635	0.279958	-1.27312	0.0187651	(-2.334856356377168, -0.21137733459990948)	0.917067	2	2	rs138799625	['Innate Immune System', 'Immune System', 'Transport of small molecules', 'Neutrophil degranulation', 'Ion transport by P-type ATPases', 'Ion channel transport']	-
90	chr15	65624504	65624504	G	C	SLC24A1	nonsynonymous SNV	SLC24A1:NM_001301031:exon1:c.G424C:p.E142Q,SLC24A1:NM_001301032:exon1:c.G424C:p.E142Q,SLC24A1:NM_004727:exon2:c.G424C:p.E142Q,SLC24A1:NM_001301033:exon4:c.G424C:p.E142Q	10.34	0.023166	0.0108359	1.09619	24	7	1012	639	2.16488	0.772364	0.0741454	(-0.07536691939193474, 1.6200954910374463)	0.917067	2	2		['Transport of small molecules', 'Transport of inorganic cations/anions and amino acids/oligopeptides', 'SLC-mediated transmembrane transport', 'Sodium/Calcium exchangers', 'Disease', 'Visual phototransduction', 'Activation of the phototransduction cascade', 'The phototransduction cascade', 'Defective SLC24A1 causes congenital stationary night blindness 1D (CSNB1D)', 'SLC transporter disorders', …	-
134	chr15	84908843	84908843	C	T	SLC28A1				0.030888	0.0123839	1.31858	32	8	1004	638	2.54183	0.932885	0.0192368	(0.15181224246927272, 1.7139584459567407)	0.917067	2	2	rs138954946	['Transport of small molecules', 'Transport of vitamins, nucleosides, and related molecules', 'SLC-mediated transmembrane transport', 'Transport of nucleosides and free purine and pyrimidine bases across the plasma membrane']	-
27	chr10	46837213	46837213	C	G	BMS1P1;FRMPD2B				0.0427184	0.0172414	1.30898	44	11	986	627	2.54361	0.933585	0.00617759	(0.26533897635684234, 1.6018301179435097)	0.917067	2	2	rs200283354	-	-
54	chr10	68749528	68749529	GA	-	CCAR1	frameshift deletion	CCAR1:NM_001282959:exon9:c.916_917del:p.E310Kfs*3,CCAR1:NM_001282960:exon9:c.916_917del:p.E310Kfs*3,CCAR1:NM_018237:exon10:c.961_962del:p.E325Kfs*3		0.0299228	0.0108359	1.46542	31	7	1005	639	2.81578	1.03524	0.0140496	(0.20908381416495625, 1.861393564463426)	0.917067	2	2	rs147413396	['mRNA Splicing - Major Pathway', 'mRNA Splicing', 'Processing of Capped Intron-Containing Pre-mRNA', 'Metabolism of RNA']	0
56	chr10	70283610	70283610	C	G	NPFFR1				0.0250965	0.0108359	1.21167	26	7	1010	639	2.34993	0.854385	0.0463185	(0.01394288276144573, 1.6948275842553513)	0.917067	2	2	rs151226427	['Signal Transduction', 'Signaling by GPCR', 'GPCR downstream signalling', 'G alpha (q) signalling events', 'Class A/1 (Rhodopsin-like receptors)', 'Peptide ligand-binding receptors', 'Orexin and neuropeptides FF and QRFP bind to their respective receptors', 'GPCR ligand binding']	7
127	chr10	122241936	122241936	C	T	TACC2				0.0260618	0.0108359	1.26611	27	7	1009	639	2.44273	0.893116	0.0365359	(0.05593340457529594, 1.7302988973705875)	0.917067	2	2	rs150502387	-	-
139	chr10	133391073	133391105	GTTTTCCTGGCTGTTGATGGATACATGTGAGCT	-	PAOX				0.046332	0.0232198	0.996654	48	15	988	631	2.04372	0.714774	0.0172518	(0.12646822637654365, 1.3030797228215074)	0.917067	2	2	rs548912631	['Amine Oxidase reactions', 'PAOs oxidise polyamines to amines', 'Metabolism', 'Biological oxidations', 'Phase I - Functionalization of compounds', 'Interconversion of polyamines', 'Metabolism of polyamines', 'Metabolism of amino acids and derivatives', 'Peroxisomal protein import', 'Protein localization']	-
22	chr5	31552788	31552788	T	A	C5orf22	nonsynonymous SNV	C5orf22:NM_018356:exon9:c.T1215A:p.D405E	15.94	0.027027	0.0108359	1.31858	28	7	1008	639	2.53571	0.930475	0.028793	(0.09633063535497477, 1.7646200983772466)	0.917067	2	2	rs16901277	-	-
33	chr5	58547401	58547401	-	AATAAT	LINC02108				0.0515152	0.0232198	1.14964	51	15	939	631	2.28477	0.826266	0.00559139	(0.24180120737680466, 1.4107304225333261)	0.917067	2	2	rs762258119	-	-
48	chr5	72199104	72199104	A	C	MAP1B	nonsynonymous SNV	MAP1B:NM_001324255:exon4:c.A5371C:p.S1791R,MAP1B:NM_005909:exon5:c.A5749C:p.S1917R	0.004	0.0328185	0.0139319	1.23612	34	9	1002	637	2.40164	0.876152	0.020548	(0.13475014987656653, 1.617554492538023)	0.917067	2	2	rs13153166	-	4
70	chr5	112266272	112266272	C	T	EPB41L4A	nonsynonymous SNV	EPB41L4A:NM_001347887:exon5:c.G394A:p.V132I,EPB41L4A:NM_001347888:exon5:c.G394A:p.V132I,EPB41L4A:NM_022140:exon5:c.G394A:p.V132I	0.504	0.00579151	0.0154799	-1.41838	6	10	1030	636	0.370485	-0.992941	0.0556562	(-2.0098770393907155, 0.02399475609161561)	0.917067	2	2	rs34008454	-	-
76	chr5	128330606	128330606	C	T	FBN2	nonsynonymous SNV	FBN2:NM_001999:exon33:c.G4312A:p.E1438K	24.2	0.0106178	0.0294118	-1.46991	11	19	1025	627	0.354146	-1.03805	0.00661449	(-1.7872313262910158, -0.28885878832429934)	0.917067	2	2	rs56168072	['Degradation of the extracellular matrix', 'Extracellular matrix organization', 'Elastic fibre formation', 'Molecules associated with elastic fibres']	-
98	chr5	150070264	150070264	C	T	CSF1R	nonsynonymous SNV	CSF1R:NM_001288705:exon8:c.G1237A:p.G413S,CSF1R:NM_005211:exon9:c.G1237A:p.G413S,CSF1R:NM_001349736:exon10:c.G1237A:p.G413S	20.9	0.0202703	0.00773994	1.38897	21	5	1015	641	2.65241	0.97547	0.0511405	(-0.00483393283116984, 1.9557741142993792)	0.917067	2	2	rs34951517	['Cytokine Signaling in Immune system', 'Immune System', 'Signaling by Interleukins', 'Other interleukin signaling', 'Generic Transcription Pathway', 'RNA Polymerase II Transcription', 'Gene expression (Transcription)', 'Transcriptional Regulation by VENTX']	1
122	chr5	178263199	178263199	C	A	COL23A1				0.00482625	0.0170279	-1.81892	5	11	1031	635	0.279958	-1.27312	0.0187651	(-2.334856356377168, -0.21137733459990948)	0.917067	2	2	rs749462	['Extracellular matrix organization', 'Collagen formation', 'Collagen biosynthesis and modifying enzymes', 'Collagen chain trimerization', 'Collagen degradation', 'Degradation of the extracellular matrix', 'Integrin cell surface interactions']	-
11	chr20	17658721	17658721	T	C	RRBP1	nonsynonymous SNV	RRBP1:NM_001365613:exon3:c.A1787G:p.Q596R	10.4	0.0337838	0.0123839	1.44787	35	8	1001	638	2.78846	1.02549	0.00945251	(0.2510243787508398, 1.7999556689274554)	0.917067	2	2	rs73092300	['Disease', 'Diseases of signal transduction by growth factor receptors and second messengers', 'Signaling by ALK in cancer', 'Signaling by ALK fusions and activated point mutants']	4
39	chr20	45886920	45886920	G	A	SPATA25	nonsynonymous SNV	SPATA25:NM_080608:exon2:c.C281T:p.P94L	12.59	0.00868726	0.0216718	-1.31885	9	14	1027	632	0.395604	-0.927341	0.0311254	(-1.770570902832247, -0.08411023328923195)	0.917067	2	2	rs3827040	-	-
71	chr22	37723862	37723862	G	A	TRIOBP	nonsynonymous SNV	TRIOBP:NM_001039141:exon7:c.G1306A:p.D436N	9.513	0.046332	0.0201238	1.2031	48	13	988	633	2.36562	0.861039	0.00656549	(0.2401658029507121, 1.4819129527346118)	0.917067	2	2	rs75659869	-	-
76	chr22	40799527	40799527	G	A	SLC25A17				0.983221	0.996364	-0.0191559	879	548	15	2	0.213869	-1.54239	0.0409916	(-3.0216523076086523, -0.06313451200155429)	0.917067	2	2	rs138308	['Metabolism', 'Alpha-oxidation of phytanate', 'Peroxisomal lipid metabolism', 'Metabolism of lipids', 'Fatty acid metabolism', 'Class I peroxisomal membrane protein import', 'Protein localization']	-
77	chr22	40907159	40907159	C	T	XPNPEP3				0.0241313	0.0108359	1.15508	25	7	1011	639	2.25731	0.814175	0.0586486	(-0.029773854771545927, 1.6581236771114463)	0.917067	2	2	rs118098040	-	-
14	chr17	3659990	3659990	G	A	CTNS				0.00772201	0.0185759	-1.26638	8	12	1028	634	0.411154	-0.888787	0.0529382	(-1.7888420601649737, 0.011268860792876811)	0.917067	2	2	rs76153698	['Transport of small molecules', 'Transport of inorganic cations/anions and amino acids/oligopeptides', 'SLC-mediated transmembrane transport', 'Miscellaneous transport and binding events']	-
59	chr17	19112584	19112584	A	G	SNORD3D				0.903846	0.960938	-0.0883654	94	123	10	5	0.382114	-0.962037	0.0883925	(-2.068624121172525, 0.14455061384780787)	0.917067	2	2	rs1558929	-	-
92	chr17	40779728	40779728	C	T	KRT27	nonsynonymous SNV	KRT27:NM_181537:exon4:c.G818A:p.R273K	22.2	0.00579151	0.0170279	-1.55589	6	11	1030	635	0.336275	-1.08982	0.0326124	(-2.0894477042967514, -0.09020206750585924)	0.917067	2	2	rs76225348	['Developmental Biology', 'Keratinization', 'Formation of the cornified envelope']	-
137	chr17	68554745	68554745	A	T	FAM20A				0.00772201	0.0185759	-1.26638	8	12	1028	634	0.411154	-0.888787	0.0529382	(-1.7888420601649737, 0.011268860792876811)	0.917067	2	2		['Regulation of Insulin-like Growth Factor (IGF) transport and uptake by Insulin-like Growth Factor Binding Proteins (IGFBPs)', 'Metabolism of proteins', 'Post-translational protein modification', 'Post-translational protein phosphorylation']	5
158	chr17	80344886	80344886	A	G	RNF213	nonsynonymous SNV	RNF213:NM_001256071:exon29:c.A6551G:p.Q2184R	0.005	0.003861	0.0139319	-1.85134	4	9	1032	637	0.274332	-1.29341	0.0319652	(-2.4753393581234224, -0.11148965524792609)	0.917067	2	2	rs138595111	['Adaptive Immune System', 'Immune System', 'Antigen processing: Ubiquitination & Proteasome degradation', 'Class I MHC mediated antigen processing & presentation', 'Disease', 'Diseases of signal transduction by growth factor receptors and second messengers', 'Infectious disease', 'Suppression of apoptosis', 'Infection with Mycobacterium tuberculosis', 'Response of Mtb to phagocytosis', 'Signalin…	10
16	chr18	31159532	31159532	-	AAA	DSCAS				0.0366795	0.0139319	1.39658	38	9	998	637	2.69495	0.991378	0.00805917	(0.2580298286428868, 1.7247260946588425)	0.917067	2	2	rs746063088	-	-
18	chr18	31592902	31592902	G	A	TTR	nonsynonymous SNV	TTR:NM_000371:exon2:c.G76A:p.G26S	1.822	0.0550193	0.0247678	1.15147	57	16	979	630	2.29252	0.829651	0.00390414	(0.2661734786739224, 1.393127966225752)	0.917067	2	2	rs1800458	['Metabolism', 'Innate Immune System', 'Immune System', 'Metabolism of vitamins and cofactors', 'Visual phototransduction', 'The canonical retinoid cycle in rods (twilight vision)', 'Neutrophil degranulation', 'Metabolism of fat-soluble vitamins', 'Sensory Perception', 'Retinoid metabolism and transport', 'Extracellular matrix organization', 'Non-integrin membrane-ECM interactions', 'Disease', 'R…	5
11	chr6	15546064	15546066	TTT	-	DTNBP1				0.0222008	0.00773994	1.52022	23	5	1013	641	2.91076	1.06841	0.0312386	(0.09625336975329635, 2.040575142580775)	0.917067	2	2		['Membrane Trafficking', 'trans-Golgi Network Vesicle Budding', 'Golgi Associated Vesicle Biogenesis', 'Vesicle-mediated transport']	-
100	chr6	132772092	132772092	-	A	SLC18B1				0.0521236	0.0201238	1.37303	54	13	982	633	2.67758	0.984914	0.00165772	(0.37122374551710335, 1.5986038602677923)	0.917067	2	2	rs577348908	-	-
101	chr6	132797077	132797077	A	G	SLC18B1	nonsynonymous SNV	SLC18B1:NM_052831:exon2:c.T88C:p.S30P	20.4	0.0337838	0.0139319	1.27794	35	9	1001	637	2.47475	0.906138	0.0162827	(0.16691383906418555, 1.645362881756087)	0.917067	2	2	rs41286192	-	-
110	chr6	147730075	147730077	AAA	-	SAMD5;SASH1				0.0389864	0.015528	1.3281	40	10	986	634	2.57201	0.944687	0.00817624	(0.2445887972939066, 1.6447851246150549)	0.917067	2	2		-	-
9	chr7	3301758	3301758	T	C	SDK1	nonsynonymous SNV	SDK1:NM_152744:exon1:c.T172C:p.S58P	0.001	0.465517	0.7	-0.58852	27	28	31	12	0.373272	-0.985448	0.0231653	(-1.836042582440717, -0.13485381529532425)	0.917067	2	2	rs10228086	['Cell-Cell communication', 'SDK interactions', 'Cell-cell junction organization', 'Cell junction organization']	-
14	chr7	5362801	5362801	C	T	TNRC18	nonsynonymous SNV	TNRC18:NM_001080495:exon12:c.G4244A:p.R1415Q	24.2	0.0173745	0.00464396	1.90354	18	3	1018	643	3.78978	1.33231	0.033212	(0.10607555093268495, 2.5585424417777265)	0.917067	2	2	rs202192065	-	-
27	chr7	15686173	15686178	TGGTGG	-	MEOX2	nonframeshift deletion	MEOX2:NM_005924:exon1:c.225_230del:p.H79_H80del		0.0222008	0.00928793	1.25718	23	6	1013	640	2.42185	0.884531	0.0551186	(-0.019380925200029986, 1.7884437628122885)	0.917067	2	2	rs756065472	-	2
31	chr7	16682768	16682768	T	-	BZW2				0.019305	0.00619195	1.64051	20	4	1016	642	3.15945	1.1504	0.0364844	(0.07234277011595558, 2.228452405855312)	0.917067	2	2	rs748709268	-	-
54	chr7	44114226	44114226	G	A	AEBP1	nonsynonymous SNV	AEBP1:NM_001129:exon21:c.G3442A:p.V1148I	17.21	0.011583	0.0309598	-1.41838	12	20	1024	626	0.366797	-1.00295	0.00651736	(-1.7254997897275388, -0.2803943268031508)	0.917067	2	2	rs13898	-	-
65	chr7	47991003	47991006	TACT	-	SUN3				0.0173745	0.00464396	1.90354	18	3	1018	643	3.78978	1.33231	0.033212	(0.10607555093268495, 2.5585424417777265)	0.917067	2	2	rs146410248	-	-
114	chr7	100999295	100999295	C	A	MUC12	nonsynonymous SNV	MUC12:NM_001164462:exon2:c.C8732A:p.T2911K	15.24	0.0256148	0.0665584	-1.37765	25	41	951	575	0.368675	-0.99784	0.000118215	(-1.5058487844086526, -0.48983174275964136)	0.917067	2	2	rs78309994	['Disease', 'Innate Immune System', 'Immune System', 'Diseases of glycosylation', 'Diseases associated with O-glycosylation of proteins', 'Metabolism of proteins', 'Defective GALNT3 causes familial hyperphosphatemic tumoral calcinosis (HFTC)', 'Defective C1GALT1C1 causes Tn polyagglutination syndrome (TNPS)', 'Defective GALNT12 causes colorectal cancer 1 (CRCS1)', 'O-linked glycosylation', 'Decti…	14
118	chr7	101039806	101039806	T	G	MUC17	nonsynonymous SNV	MUC17:NM_001040105:exon3:c.T8390G:p.V2797G	0.001	0.0222008	0.0526316	-1.24532	23	34	1013	612	0.408687	-0.894806	0.00112879	(-1.4333898654318045, -0.3562211954149337)	0.917067	2	2	rs752029816	['Disease', 'Innate Immune System', 'Immune System', 'Diseases of glycosylation', 'Diseases associated with O-glycosylation of proteins', 'Metabolism of proteins', 'Defective GALNT3 causes familial hyperphosphatemic tumoral calcinosis (HFTC)', 'Defective C1GALT1C1 causes Tn polyagglutination syndrome (TNPS)', 'Defective GALNT12 causes colorectal cancer 1 (CRCS1)', 'O-linked glycosylation', 'Decti…	14
175	chr7	149777166	149777166	C	T	SSPO				0.0135135	0.0356037	-1.39762	14	23	1022	623	0.371054	-0.991407	0.00382372	(-1.663221618620669, -0.319592657959506)	0.917067	2	2	rs75335041	['Metabolism of proteins', 'O-linked glycosylation', 'O-glycosylation of TSR domain-containing proteins', 'Post-translational protein modification']	-
0	chr3	382221	382221	A	G	CHL1	nonsynonymous SNV	CHL1:NM_001253388:exon15:c.A1919G:p.Q640R,CHL1:NM_001253387:exon16:c.A1871G:p.Q624R,CHL1:NM_006614:exon17:c.A1919G:p.Q640R	11.33	0.011583	0.0278638	-1.26638	12	18	1024	628	0.408854	-0.894397	0.0174056	(-1.6315563938510802, -0.15723710062775642)	0.917067	2	2	rs62230378	['Developmental Biology', 'L1CAM interactions', 'Axon guidance', 'CHL1 interactions', 'Nervous system development']	-
7	chr3	24228921	24228921	-	A	THRB				0.034749	0.0139319	1.31858	36	9	1000	637	2.548	0.935309	0.0128899	(0.19814664309399754, 1.672470832325835)	0.917067	2	2		['Generic Transcription Pathway', 'Nuclear Receptor transcription pathway', 'RNA Polymerase II Transcription', 'Gene expression (Transcription)', 'SUMOylation', 'SUMO E3 ligases SUMOylate target proteins', 'Metabolism of proteins', 'SUMOylation of intracellular receptors', 'Post-translational protein modification']	9
82	chr3	129488348	129488348	A	C	IFT122	nonsynonymous SNV	IFT122:NM_052990:exon13:c.A1610C:p.E537A,IFT122:NM_001280546:exon14:c.A1316C:p.E439A,IFT122:NM_018262:exon15:c.A1766C:p.E589A,IFT122:NM_001280541:exon16:c.A1919C:p.E640A,IFT122:NM_052989:exon16:c.A1943C:p.E648A,IFT122:NM_001280545:exon17:c.A1493C:p.E498A,IFT122:NM_052985:exon17:c.A2096C:p.E699A	13.93	0.00579151	0.0154799	-1.41838	6	10	1030	636	0.370485	-0.992941	0.0556562	(-2.0098770393907155, 0.02399475609161561)	0.917067	2	2	rs144397126	['Signal Transduction', 'Organelle biogenesis and maintenance', 'Signaling by Hedgehog', "Hedgehog 'off' state", 'Cilium Assembly', 'Intraflagellar transport']	13
104	chr3	167794781	167794781	G	A	SERPINI1	nonsynonymous SNV	SERPINI1:NM_001122752:exon5:c.G838A:p.A280T,SERPINI1:NM_005025:exon5:c.G838A:p.A280T	11.4	0.00772201	0.0232198	-1.58831	8	15	1028	631	0.327367	-1.11667	0.0112829	(-1.9804465495641133, -0.252899936228429)	0.917067	2	2	rs55872908	-	-
37	chr14	51827679	51827679	G	A	FRMD6;GNG2				0.959459	0.98452	-0.0371988	994	636	42	10	0.372117	-0.988546	0.00542526	(-1.685334130738032, -0.291757633207709)	0.917067	2	2	rs6572795	-	-
54	chr14	60717162	60717162	C	T	SIX4				0.003	0.0123839	-2.04543	3	8	997	638	0.23997	-1.42724	0.035528	(-2.7578591675005244, -0.09662431175702313)	0.917067	2	2	rs137972152	-	0
58	chr14	67204765	67204765	-	T	FAM71D	frameshift insertion	FAM71D:NM_173526:exon5:c.588_589insT:p.T197Yfs*30		0.042471	0.0170279	1.31858	44	11	992	635	2.56048	0.940196	0.00581729	(0.2720260713968312, 1.6083664340585881)	0.917067	2	2	rs151256654	-	-
60	chr14	67767822	67767822	T	C	ZFYVE26	nonsynonymous SNV	ZFYVE26:NM_015346:exon31:c.A5672G:p.N1891S	0.002	0.993243	0.979876	0.0195476	1029	633	7	13	3.01896	1.10491	0.0191143	(0.18074783781359283, 2.029075206378601)	0.917067	2	2	rs3742883	-	-
61	chr14	67794147	67794147	G	A	ZFYVE26				0.00579151	0.0185759	-1.68142	6	12	1030	634	0.307767	-1.17841	0.019032	(-2.1633759412728044, -0.1934486734199975)	0.917067	2	2	rs17104681	-	-
83	chr14	102040201	102040202	GA	-	DYNC1H1				0.00579151	0.0154799	-1.41838	6	10	1030	636	0.370485	-0.992941	0.0556562	(-2.0098770393907155, 0.02399475609161561)	0.917067	2	2	rs17512811	['Innate Immune System', 'Immune System', 'Neutrophil degranulation', 'Amplification of signal from the kinetochores', 'Amplification of signal from unattached kinetochores via a MAD2 inhibitory signal', 'Signal Transduction', 'Macroautophagy', 'Cell Cycle', 'Organelle biogenesis and maintenance', 'Signaling by Rho GTPases', 'RHO GTPase Effectors', 'ER to Golgi Anterograde Transport', 'Membrane T…	4
6	chr2	15402213	15402213	C	G	NBAS	nonsynonymous SNV	NBAS:NM_015909:exon26:c.G3026C:p.C1009S	0.003	0.000965251	0.0108359	-3.48877	1	7	1035	639	0.0881988	-2.42816	0.0232789	(-4.525771010028684, -0.3305537907258116)	0.917067	2	2	rs74411619	['Membrane Trafficking', 'Vesicle-mediated transport', 'COPI-dependent Golgi-to-ER retrograde traffic', 'Intra-Golgi and retrograde Golgi-to-ER traffic', 'Golgi-to-ER retrograde transport']	4
21	chr2	27101428	27101472	TCTCCTTCAGCCTCTGCCTGGCCCCCAGCTTCCCCTCTGGGCCCG	0	CGREF1				0.0273684	0.0578231	-1.07913	26	34	924	554	0.458492	-0.779811	0.00337301	(-1.30117876910888, -0.258443973869279)	0.917067	2	2		-	-
24	chr2	27518766	27518766	C	G	GCKR				0.027027	0.0108359	1.31858	28	7	1008	639	2.53571	0.930475	0.028793	(0.09633063535497477, 1.7646200983772466)	0.917067	2	2	rs8179236	['Metabolism', 'Disease', 'Regulation of Glucokinase by Glucokinase Regulatory Protein', 'SLC transporter disorders', 'Defective TPR may confer susceptibility towards thyroid papillary carcinoma (TPC)', 'Disorders of transmembrane transporters', 'Glycolysis', 'Glucose metabolism', 'Metabolism of carbohydrates']	0
38	chr2	43676025	43676025	G	C	C1GALT1C1L	nonsynonymous SNV	C1GALT1C1L:NM_001101330:exon1:c.C298G:p.L100V		0.00965251	0.0232198	-1.26638	10	15	1026	631	0.410006	-0.891582	0.0302087	(-1.697854644047076, -0.08530989854825632)	0.917067	2	2	rs146273900	-	-
66	chr2	85597128	85597128	T	C	RNF181	nonsynonymous SNV	RNF181:NM_016494:exon4:c.T352C:p.Y118H	13	0.00868726	0.0232198	-1.41838	9	15	1027	631	0.368647	-0.997917	0.0187775	(-1.8302356415950511, -0.16559830071162085)	0.917067	2	2	rs6643	['Metabolism of proteins', 'Post-translational protein modification', 'Protein ubiquitination', 'E3 ubiquitin ligases ubiquitinate target proteins']	3
18	chr1	1722575	1722575	A	T	CDK11A				0.00322581	0.0188356	-2.54573	3	11	927	573	0.168579	-1.78035	0.00644343	(-3.0611934805603456, -0.4995081854024057)	0.917067	2	2		['Cell Cycle', 'Recruitment of mitotic centrosome proteins and complexes', 'Centrosome maturation', 'Mitotic G2-G2/M phases', 'G2/M Transition', 'Cell Cycle, Mitotic']	-
32	chr1	10430465	10430465	C	T	CENPS;CENPS-CORT				0.00965251	0.0247678	-1.35949	10	16	1026	630	0.383772	-0.957707	0.0184099	(-1.7539974382965955, -0.16141623288514773)	0.917067	2	2	rs116395144	-	-
47	chr1	13475905	13475905	G	A	LRRC38	nonsynonymous SNV	LRRC38:NM_001010847:exon2:c.C826T:p.L276F	12.19	0.0241313	0.0108359	1.15508	25	7	1011	639	2.25731	0.814175	0.0586486	(-0.029773854771545927, 1.6581236771114463)	0.917067	2	2	rs2940315	-	-
49	chr1	13778796	13778796	G	A	PRDM2	nonsynonymous SNV	PRDM2:NM_001007257:exon3:c.G398A:p.C133Y,PRDM2:NM_012231:exon8:c.G1001A:p.C334Y,PRDM2:NM_015866:exon8:c.G1001A:p.C334Y	1.112	0.00868726	0.0201238	-1.21193	9	13	1027	633	0.42671	-0.851652	0.0510799	(-1.7073002760682288, 0.003997140248829356)	0.917067	2	2	rs41269803	-	-
62	chr1	17004983	17004983	C	T	ATP13A2				0.0106178	0.0263158	-1.30945	11	17	1025	629	0.397073	-0.923635	0.0179449	(-1.6885181662125364, -0.15875124604729074)	0.917067	2	2	rs41273157	['Transport of small molecules', 'Ion transport by P-type ATPases', 'Ion channel transport']	-
67	chr1	18911508	18911519	TTTATTTATTTA	-	IFFO2				0.0328185	0.0154799	1.08412	34	10	1002	636	2.15808	0.769221	0.0342298	(0.05717873010189545, 1.4812626965329607)	0.917067	2	2	rs563981723	-	-
81	chr1	26180903	26180903	G	A	CNKSR1				0.0202703	0.00773994	1.38897	21	5	1015	641	2.65241	0.97547	0.0511405	(-0.00483393283116984, 1.9557741142993792)	0.917067	2	2	rs74447837	['Signal Transduction', 'RAF/MAP kinase cascade', 'MAP2K and MAPK activation', 'MAPK family signaling cascades', 'MAPK1/MAPK3 signaling', 'Disease', 'Diseases of signal transduction by growth factor receptors and second messengers', 'Signaling by moderate kinase activity BRAF mutants', 'Signaling by high-kinase activity BRAF mutants', 'Signaling by RAS mutants', 'Signaling by BRAF and RAF1 fusion…	-
84	chr1	26448430	26448430	-	A	DHDDS				0.0344488	0.0125786	1.45348	35	8	981	628	2.80071	1.02987	0.00916182	(0.25529617919199876, 1.804452274232826)	0.917067	2	2	rs200916499	['Metabolism of proteins', 'Biosynthesis of the N-glycan precursor (dolichol lipid-linked oligosaccharide, LLO) and transfer to a nascent protein', 'Synthesis of Dolichyl-phosphate', 'Asparagine N-linked glycosylation', 'Synthesis of substrates in N-glycan biosythesis', 'Post-translational protein modification', 'Disease', 'Diseases of glycosylation', 'Defective DHDDS causes retinitis pigmentosa …	-
89	chr1	28480453	28480453	G	C	PHACTR4	nonsynonymous SNV	PHACTR4:NM_023923:exon8:c.G1639C:p.A547P,PHACTR4:NM_001048183:exon9:c.G1609C:p.A537P,PHACTR4:NM_001350158:exon10:c.G1633C:p.A545P,PHACTR4:NM_001350160:exon10:c.G1609C:p.A537P,PHACTR4:NM_001350161:exon10:c.G1561C:p.A521P,PHACTR4:NM_001350159:exon11:c.G1633C:p.A545P	26.3	0.011583	0.0278638	-1.26638	12	18	1024	628	0.408854	-0.894397	0.0174056	(-1.6315563938510802, -0.15723710062775642)	0.917067	2	2	rs72661785	-	-
103	chr1	36088204	36088204	A	T	TEKT2				0.0530888	0.0232198	1.19305	55	15	981	631	2.35848	0.858016	0.00371487	(0.2784081477986007, 1.43762462641362)	0.917067	2	2		-	-
130	chr1	54813813	54813813	-	A	LEXM				0.0232108	0.0108359	1.09898	24	7	1010	639	2.16917	0.774343	0.073409	(-0.07339311276015958, 1.622078164429884)	0.917067	2	2	rs200062276	-	-
247	chr1	165725048	165725049	AA	-	TMCO1				0.0203666	0.046729	-1.19811	20	30	962	612	0.424116	-0.857747	0.00344702	(-1.4325443381245608, -0.2829502143985293)	0.917067	2	2	rs796531795	-	-
277	chr1	200898444	200898444	T	A	INAVA	nonsynonymous SNV	INAVA:NM_001142569:exon2:c.T44A:p.I15N,INAVA:NM_001367289:exon2:c.T44A:p.I15N,INAVA:NM_018265:exon2:c.T299A:p.I100N	33	0.011583	0.0247678	-1.09646	12	16	1024	630	0.461426	-0.773434	0.0446695	(-1.528458378140058, -0.018409739191251773)	0.917067	2	2	rs41269923	-	-
316	chr1	236559018	236559018	T	C	HEATR1	nonsynonymous SNV	HEATR1:NM_018072:exon35:c.A4888G:p.N1630D	7.764	0.00675676	0.0170279	-1.33349	7	11	1029	635	0.392703	-0.934703	0.0545075	(-1.8874809556595764, 0.018075234290746423)	0.917067	2	2	rs115054974	['Major pathway of rRNA processing in the nucleolus and cytosol', 'rRNA processing', 'rRNA processing in the nucleus and cytosol', 'Metabolism of RNA', 'rRNA modification in the nucleus and cytosol']	21
23	chr9	33558115	33558115	C	G	ANKRD18B	nonsynonymous SNV	ANKRD18B:NM_001353432:exon12:c.C2199G:p.D733E	8.965	0.0299228	0.0123839	1.27278	31	8	1005	638	2.45995	0.900141	0.0243465	(0.11659545278502392, 1.683686798528825)	0.917067	2	2	rs142538183	-	-
73	chr9	87845924	87845924	A	G	CTSLP8				0.0125483	0.0294118	-1.22891	13	19	1023	627	0.419355	-0.869038	0.0168118	(-1.5814707883229961, -0.15660490572422026)	0.917067	2	2	rs67615388	-	-
135	chr9	133780652	133780652	C	G	VAV2				0.0270793	0.0108359	1.32137	28	7	1006	639	2.54076	0.932461	0.0284544	(0.09831219187097062, 1.76661073780451)	0.917067	2	2		['Hemostasis', 'GPVI-mediated activation cascade', 'Developmental Biology', 'Signal Transduction', 'Innate Immune System', 'Immune System', 'NRAGE signals death through JNK', 'p75 NTR receptor-mediated signalling', 'Signaling by VEGF', 'Signaling by Rho GTPases', 'Fcgamma receptor (FCGR) dependent phagocytosis', 'Regulation of actin dynamics for phagocytic cup formation', 'Cell death signalling v…	1
150	chr9	137354322	137354322	C	G	EXD3				0.027027	0.0108359	1.31858	28	7	1008	639	2.53571	0.930475	0.028793	(0.09633063535497477, 1.7646200983772466)	0.917067	2	2	rs142930083	-	-
32	chr4	9353662	9353662	A	G	USP17L24;USP17L25;USP17L26;USP17L27;USP17L28;USP17L29;USP17L30;USP17L5	nonsynonymous SNV	USP17L25:NM_001242326:exon1:c.A25G:p.R9G,USP17L24:NM_001242327:exon1:c.A25G:p.R9G,USP17L26:NM_001242328:exon1:c.A25G:p.R9G,USP17L5:NM_001242329:exon1:c.A25G:p.R9G,USP17L27:NM_001242330:exon1:c.A25G:p.R9G,USP17L28:NM_001242331:exon1:c.A25G:p.R9G,USP17L29:NM_001242332:exon1:c.A25G:p.R9G,USP17L30:NM_001256867:exon1:c.A25G:p.R9G	0.001	0.00059453	0.666667	-10.131	0	4	8	2	0.03125	-3.46574	0.0409556	(-6.789016527347647, -0.14245527825180648)	0.917067	2	2	rs538004740	-	-
31	chr14	45247163	45247163	C	T	MIS18BP1	nonsynonymous SNV	MIS18BP1:NM_018353:exon2:c.G124A:p.V42I	9.214	0.0019305	0.0108359	-2.48877	2	7	1034	639	0.176568	-1.73405	0.0308896	(-3.308607573621358, -0.15948956475105835)	0.917067	1	2	rs149551504	['Cell Cycle', 'Deposition of new CENPA-containing nucleosomes at the centromere', 'Chromosome Maintenance', 'Nucleosome assembly']	0
6	chr16	661012	661016	CCCCG	-	WDR90				0.00497018	0.0220126	-2.14696	5	14	1001	622	0.221921	-1.50543	0.00403006	(-2.5314434993835704, -0.4794247081308278)	0.917067	5	1		-	-
103	chr16	30664415	30664415	A	C	FBRS	nonsynonymous SNV	FBRS:NM_001105079:exon7:c.A1256C:p.H419P	2.8	0.00686275	0.0247678	-1.85161	7	16	1013	630	0.272088	-1.30163	0.0043107	(-2.195364403213765, -0.4078961128813797)	0.917067	5	1		-	-
142	chr16	71927632	71927632	A	C	IST1	nonsynonymous SNV	IST1:NM_001270979:exon6:c.A476C:p.E159A,IST1:NM_001270978:exon7:c.A476C:p.E159A,IST1:NM_001270977:exon9:c.A827C:p.E276A,IST1:NM_001270975:exon10:c.A920C:p.E307A,IST1:NM_014761:exon10:c.A916C:p.K306Q,IST1:NM_001270976:exon11:c.A959C:p.E320A	13.83	0.023166	0.00619195	1.90354	24	4	1012	642	3.80632	1.33666	0.0137285	(0.27355293262214797, 2.399774913519062)	0.917067	5	1	rs79258602	['Cell Cycle', 'Innate Immune System', 'Immune System', 'Mitotic Metaphase and Anaphase', 'Nuclear Envelope (NE) Reassembly', 'Neutrophil degranulation', 'Mitotic Anaphase', 'M Phase', 'Cell Cycle, Mitotic', 'Sealing of the nuclear envelope (NE) by ESCRT-III']	-
162	chr16	84873894	84873897	TTTT	-	CRISPLD2				0.023166	0.00464396	2.31858	24	3	1012	643	5.083	1.6259	0.00814187	(0.4216112383728938, 2.8301935937671936)	0.917067	5	1	rs779258498	['Innate Immune System', 'Immune System', 'Neutrophil degranulation']	-
188	chr16	89948839	89948839	T	A	DEF8				0.226667	0.0714286	1.666	34	5	116	65	3.81034	1.33772	0.00787599	(0.3510630952456657, 2.3243762866970012)	0.917067	5	1	rs183592656	-	-
88	chr8	124330811	124330811	A	G	TMEM65				0.00772201	0.0247678	-1.68142	8	16	1028	630	0.30642	-1.1828	0.00666579	(-2.037261329061756, -0.3283342853171968)	0.917067	5	1	rs72711173	-	-
172	chr19	41426222	41426222	G	A	B3GNT8	nonsynonymous SNV	B3GNT8:NM_198540:exon3:c.C557T:p.S186F	26.1	0.0019305	0.0201238	-3.38186	2	13	1034	633	0.0941824	-2.36252	0.00191206	(-3.8545037272632205, -0.8705398923883596)	0.917067	5	1	rs137913069	['Metabolism of proteins', 'O-linked glycosylation', 'Post-translational protein modification', 'O-linked glycosylation of mucins']	14
202	chr19	49348815	49348815	A	T	TEAD2	nonsynonymous SNV	TEAD2:NM_001256658:exon8:c.T632A:p.L211Q,TEAD2:NM_001256659:exon8:c.T632A:p.L211Q,TEAD2:NM_001256662:exon8:c.T239A:p.L80Q,TEAD2:NM_003598:exon8:c.T623A:p.L208Q,TEAD2:NM_001256660:exon9:c.T635A:p.L212Q,TEAD2:NM_001256661:exon9:c.T635A:p.L212Q	12.15	0.0241313	0.00464396	2.37748	25	3	1011	643	5.30003	1.66771	0.00652459	(0.4660814157021813, 2.869344667132295)	0.917067	5	1		['YAP1- and WWTR1 (TAZ)-stimulated gene expression', 'Generic Transcription Pathway', 'RNA Polymerase II Transcription', 'Gene expression (Transcription)', 'Transcriptional regulation by RUNX3', 'RUNX3 regulates YAP1-mediated transcription']	2
51	chrX	38106771	38106771	C	T	SYTL5	nonsynonymous SNV	SYTL5:NM_001163334:exon11:c.C1400T:p.A467V,SYTL5:NM_138780:exon11:c.C1334T:p.A445V,SYTL5:NM_001163335:exon12:c.C1334T:p.A445V	34	0.0261628	0.00464396	2.49409	27	3	1005	643	5.75821	1.75063	0.0041475	(0.5537308514363803, 2.9475221107249436)	0.917067	5	1	rs149869826	-	-
167	chrX	153505256	153505256	A	G	BGN	nonsynonymous SNV	BGN:NM_001711:exon3:c.A257G:p.K86R	4.684	0.0328185	0.00619195	2.40604	34	4	1002	642	5.44611	1.6949	0.00141356	(0.6541484963347433, 2.7356538747481007)	0.917067	5	1	rs146073993	['Metabolism', 'Extracellular matrix organization', 'Glycosaminoglycan metabolism', 'Heparan sulfate/heparin (HS-GAG) metabolism', 'Chondroitin sulfate/dermatan sulfate metabolism', 'A tetrasaccharide linker sequence is required for GAG synthesis', 'Chondroitin sulfate biosynthesis', 'Dermatan sulfate biosynthesis', 'CS/DS degradation', 'ECM proteoglycans', 'Metabolism of carbohydrates', 'Disease…	6
67	chr15	44755375	44755375	C	T	TRIM69	nonsynonymous SNV	TRIM69:NM_182985:exon2:c.C482T:p.T161M	10.31	0.333333	0.821429	-1.30117	4	23	8	5	0.108696	-2.2192	0.00477466	(-3.7605855815976366, -0.6778213865123526)	0.917067	5	1	rs3100139	['Adaptive Immune System', 'Immune System', 'Antigen processing: Ubiquitination & Proteasome degradation', 'Class I MHC mediated antigen processing & presentation']	10
124	chr10	113622137	113622137	A	G	NRAP	nonsynonymous SNV	NRAP:NM_001322945:exon23:c.T2393C:p.I798T,NRAP:NM_006175:exon23:c.T2396C:p.I799T,NRAP:NM_001261463:exon24:c.T2501C:p.I834T,NRAP:NM_198060:exon24:c.T2501C:p.I834T	25.3	0.003861	0.0170279	-2.14085	4	11	1032	635	0.223749	-1.49723	0.0106252	(-2.6458638821767515, -0.3485958354778409)	0.917067	5	1	rs112597942	-	-
86	chr5	138560909	138560910	TT	-	HSPA9				0.0193798	0.00309598	2.64609	20	2	1012	644	6.36364	1.8506	0.0127885	(0.3936980310697884, 3.3075019074321883)	0.917067	5	1	rs752621908	['Cellular responses to stress', 'Regulation of HSF1-mediated heat shock response', 'Cellular response to heat stress', 'Cellular responses to stimuli', 'Mitochondrial protein import', 'Cytokine Signaling in Immune system', 'Mitochondrial biogenesis', 'Immune System', 'Organelle biogenesis and maintenance', 'Interleukin-12 family signaling', 'Signaling by Interleukins', 'Cristae formation', 'Gene…	20
119	chr5	177524913	177524913	G	A	FAM193B	nonsynonymous SNV	FAM193B:NM_001190946:exon6:c.C1568T:p.S523F,FAM193B:NM_001366500:exon7:c.C1469T:p.S490F,FAM193B:NM_001366499:exon8:c.C446T:p.S149F,FAM193B:NM_001366498:exon9:c.C446T:p.S149F	24.9	0.0183398	0.00154799	3.56651	19	1	1017	645	12.0501	2.48908	0.0153871	(0.4757776524983832, 4.502376147328922)	0.917067	5	1	rs116293002	-	-
83	chr17	33025914	33025914	C	T	ASIC2				0.0183398	0.00309598	2.56651	19	2	1017	644	6.01573	1.79438	0.0160291	(0.3340173179874051, 3.2547389393371726)	0.917067	5	1	rs16967902	['Stimuli-sensing channels', 'Transport of small molecules', 'Ion channel transport']	-
147	chr17	75571720	75571720	G	A	LLGL2	nonsynonymous SNV	LLGL2:NM_001031803:exon18:c.G2230A:p.A744T,LLGL2:NM_004524:exon18:c.G2230A:p.A744T	23.8	0.0019305	0.0170279	-3.14085	2	11	1034	635	0.111658	-2.19231	0.00442947	(-3.7021865288265707, -0.6824397680016454)	0.917067	5	1	rs148020757	-	-
100	chr7	97006109	97006117	GCCGCCGCC	-	DLX6	nonframeshift deletion	DLX6:NM_005222:exon1:c.132_140del:p.P51_P53del		0.003861	0.0170279	-2.14085	4	11	1032	635	0.223749	-1.49723	0.0106252	(-2.6458638821767515, -0.3485958354778409)	0.917067	5	1	rs752782873	['Generic Transcription Pathway', 'RNA Polymerase II Transcription', 'Gene expression (Transcription)', 'Transcriptional regulation by RUNX2', 'Regulation of RUNX2 expression and activity']	-
103	chr7	98910223	98910267	ACCTCCACCCCCGCCCCCACCCCCACCTGCCACCCCTGTGACCCC	0	TRRAP				0.00389864	0.0203125	-2.38133	4	13	1022	627	0.18877	-1.66723	0.0036786	(-2.7922794616475666, -0.542170991297183)	0.917067	5	1		['Signal Transduction', 'Signaling by WNT', 'TCF dependent signaling in response to WNT', 'Formation of the beta-catenin:TCF transactivating complex', 'Metabolism of proteins', 'Deubiquitination', 'Ub-specific processing proteases', 'Post-translational protein modification', 'HATs acetylate histones', 'Chromatin modifying enzymes', 'Chromatin organization']	2
9	chr2	20667362	20667362	-	GGCGGCGGC	GDF7	nonframeshift insertion	GDF7:NM_182828:exon1:c.123_124insGGCGGCGGC:p.G50_R51insGGG		0.428571	0.833333	-0.959358	36	20	48	4	0.15	-1.89712	0.00131311	(-3.054347372986318, -0.7398925967854451)	0.917067	5	1	rs563301908	-	-
193	chr2	240695342	240695342	C	A	AQP12A				0.00231481	0.0183824	-2.98935	2	10	862	534	0.123898	-2.0883	0.00716251	(-3.6103109722875883, -0.5662837159876084)	0.917067	5	1	rs529645209	['Transport of small molecules', 'Passive transport by Aquaporins', 'Aquaporin-mediated transport']	-
20	chr1	1930142	1930142	C	A	CFAP74	nonsynonymous SNV	CFAP74:NM_001304360:exon26:c.G3206T:p.G1069V	25.3	0.0202703	0.00309598	2.7109	21	2	1015	644	6.66207	1.89643	0.0105646	(0.4426743669473667, 3.350185816636521)	0.917067	5	1	rs141833643	-	-
77	chr1	23794354	23794354	T	G	LYPLA2			0.28	0.00965251	0.0340557	-1.81892	10	22	1026	624	0.276449	-1.28573	0.000832558	(-2.0398241382204385, -0.5316358972306755)	0.917067	5	1		['Developmental Biology', 'L1CAM interactions', 'Axon guidance', 'Nervous system development']	-
158	chr1	108465227	108465227	G	A	NBPF6	nonsynonymous SNV	NBPF6:NM_001143988:exon13:c.G1463A:p.G488E,NBPF6:NM_001143987:exon14:c.G1550A:p.G517E	22.7	0.0252632	0.00330033	2.93635	24	2	926	604	7.82721	2.05761	0.00529194	(0.6114742991600985, 3.503738926993173)	0.917067	5	1	rs202245430	-	-
284	chr1	205420464	205420464	G	A	LEMD1	nonsynonymous SNV	LEMD1:NM_001001552:exon2:c.C73T:p.P25S,LEMD1:NM_001199050:exon2:c.C73T:p.P25S,LEMD1:NM_001199051:exon2:c.C73T:p.P25S,LEMD1:NM_001199052:exon2:c.C73T:p.P25S	24.4	0.0212355	0.00464396	2.19305	22	3	1014	643	4.65023	1.53692	0.0128154	(0.3266023926813941, 2.747231016871998)	0.917067	5	1	rs7531012	-	-
12	chr9	13224442	13224442	C	A	MPDZ	nonsynonymous SNV	MPDZ:NM_001261406:exon4:c.G325T:p.G109C,MPDZ:NM_001261407:exon4:c.G325T:p.G109C,MPDZ:NM_001330637:exon4:c.G325T:p.G109C,MPDZ:NM_003829:exon4:c.G325T:p.G109C	5.469	0.00482625	0.0216718	-2.16684	5	14	1031	632	0.218928	-1.51901	0.00370753	(-2.5449218575316284, -0.4931071565708922)	0.917067	5	1	rs61753782	-	-
47	chr9	42204969	42204969	C	G	FAM74A7				0.0040404	0.0243506	-2.59139	4	15	986	601	0.162542	-1.81682	0.00130443	(-2.9244046115263855, -0.7092299085731084)	0.917067	5	1	rs199851863	-	-
55	chr9	68297603	68297603	A	C	CBWD3	nonsynonymous SNV	CBWD3:NM_001291821:exon11:c.A780C:p.E260D,CBWD3:NM_201453:exon12:c.A840C:p.E280D	10.9	0.0406977	0.122222	-1.58649	14	22	330	158	0.304683	-1.18848	0.000822965	(-1.8848702056874502, -0.4920952846657827)	0.917067	5	1	rs1127332	-	-
26	chr4	9211735	9211735	C	T	USP17L10	nonsynonymous SNV	USP17L10:NM_001256852:exon1:c.C1079T:p.T360I	18.75	0.00390625	0.0364238	-3.22103	2	11	510	291	0.103743	-2.26584	0.0033438	(-3.7793368230400404, -0.7523342785305667)	0.917067	5	1	rs751430396	['Metabolism of proteins', 'Deubiquitination', 'Ub-specific processing proteases', 'Post-translational protein modification']	-
47	chr4	68568045	68568045	T	A	UGT2B17	nonsynonymous SNV	UGT2B17:NM_001077:exon1:c.A440T:p.D147V	24.7	0.00211416	0.0212766	-3.33111	2	12	944	552	0.0974576	-2.32834	0.00235766	(-3.8289639533989, -0.8277112247940208)	0.917067	5	1	rs143522336	['Metabolism', 'Phase II - Conjugation of compounds', 'Glucuronidation', 'Biological oxidations']	-
79	chr4	140560049	140560049	-	T	UCP1				0.0279923	0.00773994	1.85463	29	5	1007	641	3.69196	1.30616	0.00730088	(0.351921954809971, 2.2603910086989907)	0.917067	5	1	rs371463243	['The citric acid (TCA) cycle and respiratory electron transport', 'Metabolism', 'Respiratory electron transport, ATP synthesis by chemiosmotic coupling, and heat production by uncoupling proteins.', 'Mitochondrial Uncoupling', 'The fatty acid cycling model', 'The proton buffering model']	-
27	chr16	2111488	2111488	C	A	PKD1	nonsynonymous SNV	PKD1:NM_000296:exon15:c.G3679T:p.A1227S,PKD1:NM_001009944:exon15:c.G3679T:p.A1227S	0.151	0.000965251	0.0123839	-3.68142	1	8	1035	638	0.0770531	-2.56326	0.0157807	(-4.644455251129713, -0.4820646769393164)	0.917067	4	1	rs150710956	['Organelle biogenesis and maintenance', 'Cilium Assembly', 'VxPx cargo-targeting to cilium', 'Cargo trafficking to the periciliary membrane']	-
42	chr19	7629776	7629776	T	C	PET100;XAB2				0.015444	0.00154799	3.31858	16	1	1020	645	10.1176	2.31428	0.0249282	(0.29159186270218695, 4.3369704028122875)	0.917067	4	1	rs3760675	-	-
176	chr19	42375910	42375910	C	T	MEGF8	nonsynonymous SNV	MEGF8:NM_001410:exon41:c.C7472T:p.P2491L,MEGF8:NM_001271938:exon42:c.C7673T:p.P2558L	0.377	0.000965251	0.0123839	-3.68142	1	8	1035	638	0.0770531	-2.56326	0.0157807	(-4.644455251129713, -0.4820646769393164)	0.917067	4	1	rs147216997	-	-
222	chr19	52888408	52888408	T	C	ZNF320				0.022449	0.0699301	-1.63926	11	20	479	266	0.305428	-1.18604	0.00196147	(-1.9368793489680385, -0.4352032298016335)	0.917067	4	1	rs28368887	['Generic Transcription Pathway', 'RNA Polymerase II Transcription', 'Gene expression (Transcription)']	-
76	chr15	51576183	51576183	-	AAAAAAAAAAAAA	DMXL2				0.0103306	0.033871	-1.71313	10	21	958	599	0.297743	-1.21152	0.00177998	(-1.9714547622554606, -0.4515922869141157)	0.917067	4	1		-	-
91	chr15	65654708	65654709	TT	-	SLC24A1				0.0289575	0.00773994	1.90354	30	5	1006	641	3.82306	1.34105	0.00575948	(0.38913148718977575, 2.292971663788305)	0.917067	4	1	rs752251564	['Transport of small molecules', 'Transport of inorganic cations/anions and amino acids/oligopeptides', 'SLC-mediated transmembrane transport', 'Sodium/Calcium exchangers', 'Disease', 'Visual phototransduction', 'Activation of the phototransduction cascade', 'The phototransduction cascade', 'Defective SLC24A1 causes congenital stationary night blindness 1D (CSNB1D)', 'SLC transporter disorders', …	-
108	chr10	99535517	99535517	G	-	NKX2-3	frameshift deletion	NKX2-3:NM_145285:exon2:c.891delG:p.G298Afs*29		0.0123626	0.0442478	-1.83962	9	20	719	432	0.270376	-1.30794	0.00127422	(-2.103642368973592, -0.5122445624158242)	0.917067	4	1		-	-
13	chr12	6867710	6867710	-	GGGCCG	TPI1				0.0019305	0.0139319	-2.85134	2	9	1034	637	0.136901	-1.9885	0.0111351	(-3.523849176161905, -0.45314641638306696)	0.917067	4	1	rs528306063	['Metabolism', 'Glycolysis', 'Gluconeogenesis', 'Glucose metabolism', 'Metabolism of carbohydrates', 'Carbohydrate metabolism']	-
115	chr12	121516892	121516893	AA	-	KDM2B				0.0212355	0.00464396	2.19305	22	3	1014	643	4.65023	1.53692	0.0128154	(0.3266023926813941, 2.747231016871998)	0.917067	4	1		['HDMs demethylate histones', 'Chromatin modifying enzymes', 'Chromatin organization']	-
53	chr5	77030539	77030539	G	T	AGGF1				0.00579151	0.0216718	-1.90381	6	14	1030	632	0.262968	-1.33572	0.00647201	(-2.2972010349220033, -0.3742440600060507)	0.917067	4	1	rs144102562	['Disease', 'Diseases of signal transduction by growth factor receptors and second messengers', 'Signaling by BRAF and RAF1 fusions', 'Oncogenic MAPK signaling']	-
0	chr20	290563	290563	-	TT	C20orf96				0.0173745	0.00154799	3.48851	18	1	1018	645	11.4047	2.43403	0.0179683	(0.41794094565334206, 4.450112809509596)	0.917067	4	1	rs750461479	-	-
119	chr17	50167322	50167322	G	C	SGCA				0.0202703	0.00464396	2.12594	21	3	1015	643	4.43448	1.48941	0.0161674	(0.2756680734709025, 2.703153890163186)	0.917067	4	1	rs142537375	-	9
125	chr17	50836029	50836029	G	A	WFIKKN2	nonsynonymous SNV	WFIKKN2:NM_175575:exon1:c.G92A:p.R31Q	0.055	0.0164093	0.00154799	3.40604	17	1	1019	645	10.7605	2.37589	0.0210999	(0.3566906072440781, 4.39508264801445)	0.917067	4	1	rs55700534	-	-
6	chr21	10426865	10426867	GTG	-	BAGE;BAGE2;BAGE3;BAGE4				0.0305344	0.00310559	3.29749	16	1	508	321	10.1102	2.31355	0.025148	(0.2884362810839254, 4.338660514498704)	0.917067	4	1		-	-
76	chr6	101891517	101891520	AAAA	-	GRIK2				0.0224609	0.00619195	1.85895	23	4	1001	642	3.68781	1.30503	0.0164598	(0.23863483463489454, 2.3714319237331045)	0.917067	4	1		['Neurotransmitter receptors and postsynaptic signal transmission', 'Transmission across Chemical Synapses', 'Neuronal System', 'Ionotropic activity of kainate receptors', 'Activation of Na-permeable kainate receptors', 'Activation of Ca-permeable Kainate Receptor', 'Activation of kainate receptors upon glutamate binding']	15
98	chr6	132726885	132726885	A	G	VNN3			20.2	0.00579151	0.0201238	-1.7969	6	13	1030	633	0.283645	-1.26003	0.0110932	(-2.232421430895958, -0.28764566373001654)	0.917067	4	1	rs6569834	['Post-translational modification: synthesis of GPI-anchored proteins', 'Metabolism of proteins', 'Post-translational protein modification']	-
75	chr7	66773970	66773970	T	C	RABGEF1				0.00482625	0.0216718	-2.16684	5	14	1031	632	0.218928	-1.51901	0.00370753	(-2.5449218575316284, -0.4931071565708922)	0.917067	4	1	rs190189800	['Membrane Trafficking', 'Vesicle-mediated transport', 'TBC/RABGAPs', 'Rab regulation of trafficking', 'RAB GEFs exchange GTP for GDP on RABs']	11
147	chr7	128865179	128865179	C	T	ATP6V1F	nonsynonymous SNV	ATP6V1F:NM_001198909:exon2:c.C218T:p.P73L	12.2	0.003861	0.0185759	-2.26638	4	12	1032	634	0.20478	-1.58582	0.00621372	(-2.7217167919795715, -0.4499177685652125)	0.917067	4	1	rs117627878	['ROS and RNS production in phagocytes', 'Signal Transduction', 'Innate Immune System', 'Immune System', 'Cellular responses to stress', 'Transport of small molecules', 'Signaling by Insulin receptor', 'Insulin receptor recycling', 'Cellular responses to stimuli', 'Signaling by Receptor Tyrosine Kinases', 'Iron uptake and transport', 'Transferrin endocytosis and recycling', 'Amino acids regulate …	26
10	chr3	33024223	33024223	C	G	GLB1				0.003861	0.0185759	-2.26638	4	12	1032	634	0.20478	-1.58582	0.00621372	(-2.7217167919795715, -0.4499177685652125)	0.917067	4	1	rs149712618	['Metabolism', 'Glycosaminoglycan metabolism', 'Keratan sulfate/keratin metabolism', 'Heparan sulfate/heparin (HS-GAG) metabolism', 'Glycosphingolipid metabolism', 'Innate Immune System', 'Immune System', 'Keratan sulfate degradation', 'HS-GAG degradation', 'Metabolism of proteins', 'Sialic acid metabolism', 'Sphingolipid metabolism', 'Biosynthesis of the N-glycan precursor (dolichol lipid-linked…	-
63	chr3	112605458	112605458	A	G	CCDC80	nonsynonymous SNV	CCDC80:NM_199511:exon8:c.T2812C:p.Y938H,CCDC80:NM_199512:exon8:c.T2812C:p.Y938H	23.4	0.023166	0.00619195	1.90354	24	4	1012	642	3.80632	1.33666	0.0137285	(0.27355293262214797, 2.399774913519062)	0.917067	4	1	rs114697626	-	-
86	chr3	134250504	134250504	G	A	RYK	nonsynonymous SNV	RYK:NM_001005861:exon1:c.C151T:p.R51W,RYK:NM_002958:exon1:c.C151T:p.R51W	22.6	0.0171717	0.00160772	3.41695	17	1	973	621	10.8499	2.38416	0.0206619	(0.36486319702560355, 4.4034574905817765)	0.917067	4	1	rs201505334	['Signal Transduction', 'Signaling by WNT', 'TCF dependent signaling in response to WNT', 'Beta-catenin independent WNT signaling', 'PCP/CE pathway']	-
95	chr3	149179711	149179711	-	ACACACAC	CP				0.00579151	0.0216718	-1.90381	6	14	1030	632	0.262968	-1.33572	0.00647201	(-2.2972010349220033, -0.3742440600060507)	0.917067	4	1		['Regulation of Insulin-like Growth Factor (IGF) transport and uptake by Insulin-like Growth Factor Binding Proteins (IGFBPs)', 'Transport of small molecules', 'Metabolism of proteins', 'Transport of bile salts and organic acids, metal ions and amine compounds', 'SLC-mediated transmembrane transport', 'Metal ion SLC transporters', 'Post-translational protein modification', 'Post-translational pro…	5
178	chr2	232407089	232407089	C	G	ALPG	nonsynonymous SNV	ALPG:NM_031313:exon2:c.C100G:p.Q34E	0.001	0.015444	0.00154799	3.31858	16	1	1020	645	10.1176	2.31428	0.0249282	(0.29159186270218695, 4.3369704028122875)	0.917067	4	1	rs146369944	['Post-translational modification: synthesis of GPI-anchored proteins', 'Metabolism of proteins', 'Post-translational protein modification']	33
125	chr1	51408295	51408295	G	A	EPS15	nonsynonymous SNV	EPS15:NM_001159969:exon3:c.C371T:p.S124L,EPS15:NM_001981:exon15:c.C1313T:p.S438L	33	0.0241313	0.00773994	1.64051	25	5	1011	641	3.17013	1.15377	0.0191438	(0.18850395186491675, 2.11904034880368)	0.917067	4	1	rs41292521	['Signal Transduction', 'Signaling by EGFR', 'EGFR downregulation', 'Membrane Trafficking', 'Vesicle-mediated transport', 'Signaling by MET', 'Negative regulation of MET activity', 'Cargo recognition for clathrin-mediated endocytosis', 'Clathrin-mediated endocytosis', 'Signaling by Receptor Tyrosine Kinases', 'Disease', 'Infectious disease', 'InlB-mediated entry of Listeria monocytogenes into hos…	5
145	chr1	78046369	78046369	-	CGCCGCGCCG	GIPC2				0.00289575	0.0170279	-2.55589	3	11	1033	635	0.167649	-1.78588	0.00626309	(-3.0663015118834127, -0.5054593968310024)	0.917067	4	1	rs750714304	-	-
33	chr9	37800859	37800859	C	T	DCAF10				0.00059453	0.0139319	-4.5505	0	9	1036	637	0.0341592	-3.37672	0.0201992	(-6.2261955144109145, -0.5272535358759467)	0.917067	4	1	rs150129303	['Metabolism of proteins', 'Post-translational protein modification', 'Neddylation']	10
44	chr9	42186792	42186792	G	C	SPATA31A6	nonsynonymous SNV	SPATA31A6:NM_001145196:exon4:c.G1090C:p.G364R		0.00503018	0.0192926	-1.93937	5	12	989	610	0.256994	-1.3587	0.0110629	(-2.4068429341322526, -0.31056528948625783)	0.917067	4	1	rs2808966	-	-
102	chr9	122800372	122800372	G	A	OR1K1	nonsynonymous SNV	OR1K1:NM_080859:exon1:c.G250A:p.A84T	13.73	0.00772201	0.0247678	-1.68142	8	16	1028	630	0.30642	-1.1828	0.00666579	(-2.037261329061756, -0.3283342853171968)	0.917067	4	1	rs55961642	['Olfactory Signaling Pathway', 'Sensory Perception']	-
124	chr9	132073750	132073750	A	-	MED27				0.0174081	0.00309598	2.49129	18	2	1016	644	5.70472	1.74129	0.0197599	(0.2770919055842729, 3.2054974450200184)	0.917067	4	1	rs777430600	['Generic Transcription Pathway', 'RNA Polymerase II Transcription', 'Gene expression (Transcription)', 'Developmental Biology', 'Metabolism', 'PPARA activates gene expression', 'Transcriptional regulation of white adipocyte differentiation', 'Regulation of lipid metabolism by PPARalpha', 'Metabolism of lipids']	9
34	chr16	2499787	2499787	C	T	TBC1D24				0.00579151	0.0201238	-1.7969	6	13	1030	633	0.283645	-1.26003	0.0110932	(-2.232421430895958, -0.28764566373001654)	0.917067	3	1	rs200545150	['Membrane Trafficking', 'Vesicle-mediated transport', 'TBC/RABGAPs', 'Rab regulation of trafficking']	-
70	chr16	21404700	21404700	G	A	NPIPB3	unknown	UNKNOWN		0.00289575	0.0123839	-2.09646	3	8	1033	638	0.231607	-1.46271	0.0311916	(-2.7932804088672274, -0.13214646870592084)	0.917067	3	1		-	-
183	chr16	89233383	89233426	TCAACTCGCACTGCGTATGCAACTCAACTCGCACTGCGTATGCA	0	ZNF778				0.00530786	0.0175439	-1.72477	5	10	937	560	0.298826	-1.20789	0.0281715	(-2.2865025686612857, -0.12928478947705968)	0.917067	3	1		['Generic Transcription Pathway', 'RNA Polymerase II Transcription', 'Gene expression (Transcription)']	-
38	chr19	6897184	6897184	G	C	ADGRE1	nonsynonymous SNV	ADGRE1:NM_001256253:exon4:c.G274C:p.G92R,ADGRE1:NM_001256255:exon4:c.G274C:p.G92R,ADGRE1:NM_001974:exon4:c.G274C:p.G92R	20.3	0.00482625	0.0185759	-1.94445	5	12	1031	634	0.256224	-1.3617	0.0108724	(-2.409653869768941, -0.31375466409832775)	0.917067	3	1	rs112217832	['Signal Transduction', 'Signaling by GPCR', 'Class B/2 (Secretin family receptors)', 'GPCR ligand binding']	-
53	chr19	7911242	7911242	-	G	MAP2K7				0.000965251	0.0108359	-3.48877	1	7	1035	639	0.0881988	-2.42816	0.0232789	(-4.525771010028684, -0.3305537907258116)	0.917067	3	1	rs768231846	['Cytokine Signaling in Immune system', 'Toll Like Receptor 4 (TLR4) Cascade', 'MyD88:MAL(TIRAP) cascade initiated on plasma membrane', 'MyD88-independent TLR4 cascade ', 'Toll Like Receptor 9 (TLR9) Cascade', 'Toll Like Receptor 10 (TLR10) Cascade', 'Toll Like Receptor 3 (TLR3) Cascade', 'Toll Like Receptor 5 (TLR5) Cascade', 'Toll Like Receptor TLR1:TLR2 Cascade', 'Toll Like Receptor 7/8 (TLR7/…	3
97	chr19	16997317	16997317	C	T	CPAMD8	nonsynonymous SNV	CPAMD8:NM_015692:exon11:c.G889A:p.D297N	21.7	0.019305	0.00619195	1.64051	20	4	1016	642	3.15945	1.1504	0.0364844	(0.07234277011595558, 2.228452405855312)	0.917067	3	1	rs61744199	-	-
246	chr19	57909712	57909712	G	T	ZNF417	nonsynonymous SNV	ZNF417:NM_001297734:exon3:c.C563A:p.A188E,ZNF417:NM_152475:exon3:c.C566A:p.A189E	0.005	0.0220588	0.0566667	-1.36114	21	34	931	566	0.375498	-0.979503	0.000528564	(-1.5334201455549565, -0.4255864263782887)	0.917067	3	1	rs145569539	['Generic Transcription Pathway', 'RNA Polymerase II Transcription', 'Gene expression (Transcription)']	2
25	chr11	6846440	6846440	A	G	OR10A5	nonsynonymous SNV	OR10A5:NM_178168:exon1:c.A758G:p.Y253C	17.57	0.015444	0.00154799	3.31858	16	1	1020	645	10.1176	2.31428	0.0249282	(0.29159186270218695, 4.3369704028122875)	0.917067	3	1	rs138867789	['Olfactory Signaling Pathway', 'Sensory Perception']	-
26	chr11	6984113	6984113	T	A	ZNF215				0.00772201	0.0232198	-1.58831	8	15	1028	631	0.327367	-1.11667	0.0112829	(-1.9804465495641133, -0.252899936228429)	0.917067	3	1	rs896497503	['Generic Transcription Pathway', 'RNA Polymerase II Transcription', 'Gene expression (Transcription)']	-
47	chr11	45649902	45649902	G	A	CHST1	nonsynonymous SNV	CHST1:NM_003654:exon4:c.C1022T:p.T341I	13.52	0.00579151	0.0201238	-1.7969	6	13	1030	633	0.283645	-1.26003	0.0110932	(-2.232421430895958, -0.28764566373001654)	0.917067	3	1	rs57330063	['Metabolism', 'Glycosaminoglycan metabolism', 'Keratan sulfate/keratin metabolism', 'Keratan sulfate biosynthesis', 'Metabolism of carbohydrates']	-
63	chr11	59478120	59478120	G	T	OR4D10	stopgain	OR4D10:NM_001004705:exon1:c.G691T:p.E231X	35	0.00675676	0.0201238	-1.5745	7	13	1029	633	0.33124	-1.10491	0.0191143	(-2.029075206378601, -0.18074783781359283)	0.917067	3	1	rs75898556	['Olfactory Signaling Pathway', 'Sensory Perception']	-
89	chrX	67545337	67545337	A	0	AR				0.0155039	0.0433437	-1.48319	16	28	1016	618	0.347582	-1.05676	0.000874112	(-1.6790766559787054, -0.4344352612536131)	0.917067	3	1		['Signal Transduction', 'Signaling by Rho GTPases', 'RHO GTPase Effectors', 'Generic Transcription Pathway', 'Cellular responses to stress', 'SUMOylation', 'SUMO E3 ligases SUMOylate target proteins', 'HSP90 chaperone cycle for steroid hormone receptors (SHR) in the presence of ligand', 'Nuclear Receptor transcription pathway', 'Metabolism of proteins', 'SUMOylation of intracellular receptors', '…	2
136	chrX	120159134	120159154	GGCGGAGAAGAAAAAGATGGC	-	RHOXF2;RHOXF2B	nonframeshift deletion	RHOXF2B:NM_001099685:exon2:c.199_219del:p.E76_G82del,RHOXF2:NM_032498:exon2:c.199_219del:p.E76_G82del		0.0194175	0.00464396	2.06393	20	3	1010	643	4.24422	1.44556	0.0199612	(0.22804650626598622, 2.663071692310404)	0.917067	3	1		-	-
72	chr15	45669987	45669987	G	A	SQOR				0.00289575	0.0139319	-2.26638	3	9	1033	637	0.20555	-1.58207	0.0179644	(-2.892433111366721, -0.27169709306444956)	0.917067	3	1	rs76269366	['Metabolism', 'Sulfide oxidation to sulfate', 'Degradation of cysteine and homocysteine', 'Sulfur amino acid metabolism', 'Metabolism of amino acids and derivatives']	-
84	chr15	59093361	59093361	-	TTC	RNF111				0.00194932	0.0139319	-2.83735	2	9	1024	637	0.138238	-1.97878	0.0115368	(-3.514142741761278, -0.4434163518458514)	0.917067	3	1	rs35858450	['Adaptive Immune System', 'Signal Transduction', 'Immune System', 'Signaling by TGF-beta Receptor Complex', 'Generic Transcription Pathway', 'Transcriptional activity of SMAD2/SMAD3:SMAD4 heterotrimer', 'SMAD2/SMAD3:SMAD4 heterotrimer regulates transcription', 'Formation of Incision Complex in GG-NER', 'Nucleotide Excision Repair', 'Global Genome Nucleotide Excision Repair (GG-NER)', 'RNA Polyme…	3
138	chr15	89273512	89273516	AAAAA	-	FANCI				0.0173745	0.00309598	2.48851	18	2	1018	644	5.69352	1.73933	0.019899	(0.27512787322309706, 3.2035283394371135)	0.917067	3	1	rs779806221	['Fanconi Anemia Pathway', 'DNA Repair', 'DNA replication and repair', 'Fanconi Anemia Pathway in DNA repair', 'DNA repair', 'Generic Transcription Pathway', 'Transcriptional Regulation by TP53', 'TP53 Regulates Transcription of DNA Repair Genes', 'RNA Polymerase II Transcription', 'Gene expression (Transcription)']	0
145	chr15	98948752	98948752	T	G	IGF1R				0.00289575	0.0139319	-2.26638	3	9	1033	637	0.20555	-1.58207	0.0179644	(-2.892433111366721, -0.27169709306444956)	0.917067	3	1	rs182933933	['Signal Transduction', 'Signaling by Type 1 Insulin-like Growth Factor 1 Receptor (IGF1R)', 'IGF1R signaling cascade', 'IRS-related events triggered by IGF1R', 'SHC-related events triggered by IGF1R', 'Signaling by Receptor Tyrosine Kinases', 'ESR-mediated signaling', 'Signaling by Nuclear Receptors', 'Extra-nuclear estrogen signaling']	1
38	chr10	47529739	47529739	A	-	BMS1P2-AGAP9				0.0376238	0.0113269	1.7319	38	7	972	611	3.4124	1.22742	0.00306685	(0.41494554255518323, 2.039888788209274)	0.917067	3	1		-	-
4	chr12	557776	557776	C	A	B4GALNT3				0.0019305	0.0123839	-2.68142	2	8	1034	638	0.154255	-1.86915	0.0182984	(-3.4217722958947228, -0.3165199697922263)	0.917067	3	1	rs182417902	-	-
36	chr12	18701607	18701609	TCC	-	PLCZ1				0.00772201	0.0216718	-1.48877	8	14	1028	632	0.351306	-1.0461	0.0190215	(-1.9203893272613344, -0.17180435234601465)	0.917067	3	1	rs760328580	['Metabolism', 'Inositol phosphate metabolism', 'Synthesis of IP3 and IP4 in the cytosol']	12
43	chr12	23762614	23762614	A	-	SOX5				0.0314342	0.0124224	1.3394	32	8	986	636	2.58012	0.947837	0.0173948	(0.16670663624422477, 1.72896650347053)	0.917067	3	1	rs769566123	-	9
88	chr12	94994292	94994292	T	-	NDUFA12				0.0164093	0.00154799	3.40604	17	1	1019	645	10.7605	2.37589	0.0210999	(0.3566906072440781, 4.39508264801445)	0.917067	3	1	rs765812872	['The citric acid (TCA) cycle and respiratory electron transport', 'Metabolism', 'Respiratory electron transport, ATP synthesis by chemiosmotic coupling, and heat production by uncoupling proteins.', 'Respiratory electron transport', 'Complex I biogenesis']	31
105	chr12	111598976	111599014	TGTTGCTGCTGCTGCTGCTGCTGCTGCTGCTGCTGCTGC	0	ATXN2				0.00579151	0.0185759	-1.68142	6	12	1030	634	0.307767	-1.17841	0.019032	(-2.1633759412728044, -0.1934486734199975)	0.917067	3	1		-	-
13	chr5	10249897	10249897	-	AAAAA	ATPSCKMT				0.0108481	0.0362776	-1.74163	11	23	1003	611	0.291343	-1.23325	0.000863348	(-1.9587599141601024, -0.5077456296821362)	0.917067	3	1		-	-
75	chr5	128290914	128290914	A	G	FBN2				0.0212355	0.00619195	1.77801	22	4	1014	642	3.48225	1.24768	0.0222791	(0.17774902187923636, 2.3176074016752786)	0.917067	3	1	rs188045597	['Degradation of the extracellular matrix', 'Extracellular matrix organization', 'Elastic fibre formation', 'Molecules associated with elastic fibres']	-
81	chr5	134905231	134905231	C	T	PCBD2				0.043554	0.0126263	1.78638	25	5	549	391	3.56102	1.27005	0.0101951	(0.301144552543544, 2.2389495092763267)	0.917067	3	1	rs6892348	-	1
109	chr5	176060174	176060174	T	C	LOC100996385				0.0408163	0.101093	-1.30846	24	37	564	329	0.378378	-0.971861	0.000337583	(-1.5032467508897431, -0.44047441516818875)	0.917067	3	1	rs62389171	-	-
17	chr20	28565289	28565289	C	G	NONE;FRG1CP				0.00482625	0.0154799	-1.68142	5	10	1031	636	0.308438	-1.17623	0.0324797	(-2.2542885868402847, -0.09817761563328187)	0.917067	3	1		-	-
37	chr20	45833836	45833836	C	T	SNX21				0.00488281	0.0174051	-1.83372	5	11	1019	621	0.27701	-1.2837	0.0178113	(-2.3455277083087154, -0.22187891499831758)	0.917067	3	1	rs116024725	-	-
69	chr22	37182348	37182348	C	T	C1QTNF6	nonsynonymous SNV	C1QTNF6:NM_031910:exon3:c.G677A:p.R226H,C1QTNF6:NM_182486:exon3:c.G677A:p.R226H,C1QTNF6:NM_001365878:exon5:c.G620A:p.R207H	34	0.00868726	0.0216718	-1.31885	9	14	1027	632	0.395604	-0.927341	0.0311254	(-1.770570902832247, -0.08411023328923195)	0.917067	3	1	rs17812681	-	-
17	chr17	4006836	4006836	T	C	ZZEF1				0.00675676	0.0185759	-1.45903	7	12	1029	634	0.35941	-1.02329	0.0323889	(-1.9606769042685026, -0.08590365999051885)	0.917067	3	1	rs376505751	-	-
28	chr18	53402929	53402929	C	T	DCC				0.00482625	0.0154799	-1.68142	5	10	1031	636	0.308438	-1.17623	0.0324797	(-2.2542885868402847, -0.09817761563328187)	0.917067	3	1	rs143230659	['Apoptosis', 'Developmental Biology', 'Netrin-1 signaling', 'DCC mediated attractive signaling', 'Caspase activation via Dependence Receptors in the absence of ligand', 'Axon guidance', 'Caspase activation via extrinsic apoptotic signalling pathway', 'Programmed Cell Death', 'Nervous system development', 'DSCAM interactions', 'Signaling by ROBO receptors', 'Netrin mediated repulsion signals', 'R…	8
23	chr6	26383832	26383832	C	T	BTN2A2	nonsynonymous SNV	BTN2A2:NM_001197237:exon2:c.C11T:p.A4V,BTN2A2:NM_001197238:exon2:c.C11T:p.A4V,BTN2A2:NM_001197239:exon2:c.C11T:p.A4V,BTN2A2:NM_001197240:exon2:c.C11T:p.A4V,BTN2A2:NM_006995:exon2:c.C11T:p.A4V,BTN2A2:NM_181531:exon2:c.C11T:p.A4V	13.67	0.00675676	0.0216718	-1.68142	7	14	1029	632	0.307094	-1.1806	0.0112343	(-2.093278560249652, -0.2679224842446213)	0.917067	3	1	rs73736234	['Adaptive Immune System', 'Immune System', 'Butyrophilin (BTN) family interactions']	-
67	chr6	73111290	73111290	T	A	KCNQ5				0.00868726	0.0232198	-1.41838	9	15	1027	631	0.368647	-0.997917	0.0187775	(-1.8302356415950511, -0.16559830071162085)	0.917067	3	1	rs45536838	['Neuronal System', 'Potassium Channels', 'Voltage gated Potassium channels']	-
99	chr7	97006052	97006054	GCA	-	DLX6	nonframeshift deletion	DLX6:NM_005222:exon1:c.75_77del:p.Q44del		0.023166	0.00773994	1.58162	24	5	1012	641	3.04032	1.11196	0.024442	(0.14338454212156904, 2.080538507852639)	0.917067	3	1	rs748226556	['Generic Transcription Pathway', 'RNA Polymerase II Transcription', 'Gene expression (Transcription)', 'Transcriptional regulation by RUNX2', 'Regulation of RUNX2 expression and activity']	-
146	chr7	128677743	128677743	C	T	FAM71F2	nonsynonymous SNV	FAM71F2:NM_001012454:exon3:c.C545T:p.T182I,FAM71F2:NM_001128926:exon3:c.C518T:p.T173I,FAM71F2:NM_001290254:exon4:c.C260T:p.T87I,FAM71F2:NM_001290255:exon4:c.C260T:p.T87I	28.9	0.003861	0.0154799	-2.00335	4	10	1032	636	0.246512	-1.40035	0.0183504	(-2.5640784552165203, -0.2366137739345615)	0.917067	3	1	rs201533178	-	-
14	chr3	37047639	37047639	A	G	MLH1	nonsynonymous SNV	MLH1:NM_001354625:exon13:c.A778G:p.K260E,MLH1:NM_001354621:exon14:c.A829G:p.K277E,MLH1:NM_001354623:exon14:c.A829G:p.K277E,MLH1:NM_001354624:exon14:c.A778G:p.K260E,MLH1:NM_001354626:exon14:c.A778G:p.K260E,MLH1:NM_001354627:exon14:c.A778G:p.K260E,MLH1:NM_001167619:exon15:c.A1129G:p.K377E,MLH1:NM_001258273:exon15:c.A1129G:p.K377E,MLH1:NM_001354615:exon15:c.A1129G:p.K377E,MLH1:NM_001354616:exon15:c.…	27.8	0.00675676	0.0201238	-1.5745	7	13	1029	633	0.33124	-1.10491	0.0191143	(-2.029075206378601, -0.18074783781359283)	0.917067	3	1	rs35001569	['Mismatch Repair', 'Mismatch repair (MMR) directed by MSH2:MSH6 (MutSalpha)', 'DNA Repair', 'Reproduction', 'Meiosis', 'Cell Cycle', 'Disease', 'Generic Transcription Pathway', 'Transcriptional Regulation by TP53', 'Mismatch repair (MMR) directed by MSH2:MSH3 (MutSbeta)', 'Diseases of Mismatch Repair (MMR)', 'Defective Mismatch Repair Associated With MLH1', 'Defective Mismatch Repair Associated …	0
50	chr3	66346343	66346343	-	T	SLC25A26				0.016441	0.00309598	2.40883	17	2	1017	644	5.3825	1.68315	0.0246732	(0.21467034518125105, 3.1516346419228785)	0.917067	3	1	rs770511655	['Transport of small molecules', 'Transport of inorganic cations/anions and amino acids/oligopeptides', 'SLC-mediated transmembrane transport']	-
56	chr3	99830513	99830513	C	T	CMSS1				0.00482625	0.0170279	-1.81892	5	11	1031	635	0.279958	-1.27312	0.0187651	(-2.334856356377168, -0.21137733459990948)	0.917067	3	1	rs115071595	-	-
39	chr14	52060173	52060173	G	A	NID2	nonsynonymous SNV	NID2:NM_007361:exon3:c.C718T:p.P240S	22.8	0.00579151	0.0185759	-1.68142	6	12	1030	634	0.307767	-1.17841	0.019032	(-2.1633759412728044, -0.1934486734199975)	0.917067	3	1	rs112271442	['Extracellular matrix organization', 'Laminin interactions']	9
13	chr2	26461006	26461006	C	T	OTOF	nonsynonymous SNV	OTOF:NM_194322:exon26:c.G3488A:p.R1163Q,OTOF:NM_004802:exon27:c.G3257A:p.R1086Q,OTOF:NM_194323:exon27:c.G3257A:p.R1086Q,OTOF:NM_001287489:exon44:c.G5558A:p.R1853Q,OTOF:NM_194248:exon44:c.G5558A:p.R1853Q	24.2	0.003861	0.0154799	-2.00335	4	10	1032	636	0.246512	-1.40035	0.0183504	(-2.5640784552165203, -0.2366137739345615)	0.917067	3	1	rs111033329	['Protein localization', 'Insertion of tail-anchored proteins into the endoplasmic reticulum membrane', 'Sensory processing of sound', 'Sensory processing of sound by inner hair cells of the cochlea', 'Sensory Perception']	-
18	chr2	27101419	27101427	CCGGGGGCA	0	CGREF1				0.007431	0.0220339	-1.5681	7	13	935	577	0.332291	-1.10174	0.01953	(-2.0264287240883543, -0.17705821828526724)	0.917067	3	1		-	-
48	chr2	53937577	53937577	T	C	PSME4				0.00579151	0.0170279	-1.55589	6	11	1030	635	0.336275	-1.08982	0.0326124	(-2.0894477042967514, -0.09020206750585924)	0.917067	3	1	rs199596247	['Downstream signaling events of B Cell Receptor (BCR)', 'Activation of NF-kappaB in B cells', 'Cellular response to hypoxia', 'Oxygen-dependent proline hydroxylation of Hypoxia-inducible Factor Alpha', 'Antigen processing-Cross presentation', 'Cross-presentation of soluble exogenous antigens (endosomes)', 'PIP3 activates AKT signaling', 'Cytokine Signaling in Immune system', 'Adaptive Immune Sys…	3
83	chr2	108294295	108294295	G	A	SULT1C2	nonsynonymous SNV	SULT1C2:NM_001056:exon3:c.G218A:p.R73Q,SULT1C2:NM_176825:exon3:c.G218A:p.R73Q	23.1	0.00675676	0.0185759	-1.45903	7	12	1029	634	0.35941	-1.02329	0.0323889	(-1.9606769042685026, -0.08590365999051885)	0.917067	3	1	rs17036058	['Metabolism', 'Phase II - Conjugation of compounds', 'Cytosolic sulfonation of small molecules', 'Biological oxidations']	-
99	chr2	128318365	128318365	T	A	HS6ST1	stopgain	HS6ST1:NM_004807:exon1:c.A199T:p.K67X	35	0.0250965	0.00773994	1.69709	26	5	1010	641	3.3002	1.19398	0.0150122	(0.2317784816338323, 2.1561864637116614)	0.917067	3	1	rs202247387	['Metabolism', 'Glycosaminoglycan metabolism', 'Heparan sulfate/heparin (HS-GAG) metabolism', 'HS-GAG biosynthesis', 'Metabolism of carbohydrates']	5
101	chr2	130115195	130115195	A	G	POTEF			0.591	0.0222008	0.00619195	1.84214	23	4	1013	642	3.64413	1.29312	0.0174681	(0.22673942486679555, 2.3594938836342783)	0.917067	3	1	rs201580636	-	-
78	chr1	25228228	25228228	G	A	SYF2	nonsynonymous SNV	SYF2:NM_207170:exon3:c.C140T:p.A47V,SYF2:NM_015484:exon4:c.C266T:p.A89V	23	0.023166	0.00928793	1.31858	24	6	1012	640	2.52964	0.928079	0.0432814	(0.028021962574456882, 1.828135412677938)	0.917067	3	1	rs35324907	['mRNA Splicing - Major Pathway', 'mRNA Splicing', 'Processing of Capped Intron-Containing Pre-mRNA', 'Metabolism of RNA']	0
131	chr1	55039879	55039879	-	CTGCTG	PCSK9	nonframeshift insertion	PCSK9:NM_174936:exon1:c.42_43insCTGCTG:p.L23_G24insLL		0.00289575	0.0139319	-2.26638	3	9	1033	637	0.20555	-1.58207	0.0179644	(-2.892433111366721, -0.27169709306444956)	0.917067	3	1	rs35574083	['Plasma lipoprotein assembly, remodeling, and clearance', 'Regulation of Insulin-like Growth Factor (IGF) transport and uptake by Insulin-like Growth Factor Binding Proteins (IGFBPs)', 'Transport of small molecules', 'Metabolism of proteins', 'Post-translational protein modification', 'VLDLR internalisation and degradation', 'Post-translational protein phosphorylation', 'LDL clearance', 'Plasma …	5
75	chr9	87885274	87885274	C	G	SPATA31E1	nonsynonymous SNV	SPATA31E1:NM_178828:exon4:c.C787G:p.L263V	0.065	0.0222008	0.00773994	1.52022	23	5	1013	641	2.91076	1.06841	0.0312386	(0.09625336975329635, 2.040575142580775)	0.917067	3	1	rs77127003	-	-
142	chr9	136676914	136676914	G	C	AGPAT2				0.0216535	0.00776398	1.47974	22	5	994	639	2.82857	1.03977	0.0368155	(0.06366736387158922, 2.015876213418762)	0.917067	3	1		['Metabolism', 'Synthesis of PA', 'Glycerophospholipid biosynthesis', 'Phospholipid metabolism', 'Innate Immune System', 'Immune System', 'Metabolism of lipids', 'Neutrophil degranulation']	-
9	chrY	11340752	11340752	T	C	TTTY23;GYG2P1				0.120647	0.271967	-1.17264	97	130	707	348	0.367272	-1.00165	1.95796e-11	(-1.29426828429586, -0.7090350318527361)	3.45075e-06	3	1	rs76799928	-	-
16	chrY	11350954	11350954	G	C	TTTY23;GYG2P1				0.108696	0.261062	-1.2641	85	118	697	334	0.345184	-1.06368	1.26658e-11	(-1.371510794627515, -0.7558447768908285)	2.67869e-06	3	1	rs75895346	-	-
43	chr4	44683219	44683219	-	T	GUF1				0.0164093	0.00309598	2.40604	17	2	1019	644	5.37193	1.68119	0.0248412	(0.21270823225930635, 3.1496674804964933)	0.917067	3	1	rs759844499	-	-
69	chr4	112648539	112648539	T	G	MIR302B;MIR302CHG				0.00482625	0.0170279	-1.81892	5	11	1031	635	0.279958	-1.27312	0.0187651	(-2.334856356377168, -0.21137733459990948)	0.917067	3	1	rs114318553	-	-
83	chr4	152652510	152652510	T	A	TMEM154				0.0357143	0.0123839	1.52804	37	8	999	638	2.9537	1.08306	0.00587689	(0.31242898904113703, 1.8536907622801126)	0.917067	3	1		-	-
3	chr16	286731	286731	G	A	PDIA2	nonsynonymous SNV	PDIA2:NM_006849:exon9:c.G1418A:p.R473Q	23	0.027027	0.0123839	1.12594	28	8	1008	638	2.21528	0.795378	0.049021	(0.003412288270714714, 1.5873433181469734)	0.917067	2	1	rs116969376	-	-
83	chr16	24890978	24890978	C	G	SLC5A11	nonsynonymous SNV	SLC5A11:NM_001258412:exon8:c.C564G:p.F188L,SLC5A11:NM_001352237:exon8:c.C477G:p.F159L,SLC5A11:NM_001258411:exon9:c.C669G:p.F223L,SLC5A11:NM_001258413:exon9:c.C582G:p.F194L,SLC5A11:NM_001352238:exon9:c.C669G:p.F223L,SLC5A11:NM_001352250:exon9:c.C693G:p.F231L,SLC5A11:NM_001352259:exon9:c.C582G:p.F194L,SLC5A11:NM_052944:exon9:c.C774G:p.F258L,SLC5A11:NM_001352236:exon10:c.C582G:p.F194L,SLC5A11:NM_001…	24.3	0.00772201	0.0185759	-1.26638	8	12	1028	634	0.411154	-0.888787	0.0529382	(-1.7888420601649737, 0.011268860792876811)	0.917067	2	1	rs35993597	['Transport of small molecules', 'Transport of bile salts and organic acids, metal ions and amine compounds', 'SLC-mediated transmembrane transport', 'Inositol transporters', 'Metabolism', 'Metabolism of amine-derived hormones', 'Thyroxine biosynthesis', 'Transport of inorganic cations/anions and amino acids/oligopeptides', 'Multifunctional anion exchangers', 'Organic anion transporters', 'Metabo…	-
106	chr16	30899544	30899544	A	T	CTF1				0.011583	0.0294118	-1.34438	12	19	1024	627	0.386719	-0.950058	0.0106949	(-1.6795654865550822, -0.22054970213486103)	0.917067	2	1		['Cytokine Signaling in Immune system', 'Immune System', 'Signaling by Interleukins', 'Interleukin-6 family signaling', 'IL-6-type cytokine receptor ligand interactions']	1
111	chr16	31191652	31191652	C	T	FUS				0.00394477	0.0139319	-1.82038	4	9	1010	637	0.280308	-1.27187	0.0349402	(-2.453825321720572, -0.08990701923836908)	0.917067	2	1	rs140875749	['mRNA Splicing - Major Pathway', 'mRNA Splicing', 'Processing of Capped Intron-Containing Pre-mRNA', 'Metabolism of RNA']	0
127	chr16	57816288	57816288	T	C	LOC388282				0.00965251	0.0232198	-1.26638	10	15	1026	631	0.410006	-0.891582	0.0302087	(-1.697854644047076, -0.08530989854825632)	0.917067	2	1	rs918743	-	-
31	chr8	12417386	12417386	G	C	FAM90A25P				0.0286885	0.0601093	-1.06711	14	22	474	344	0.461834	-0.772551	0.0269173	(-1.456855585139806, -0.08824599098966679)	0.917067	2	1	rs756821140	-	-
32	chr8	12427811	12427811	G	A	FAM86B2				0.0560224	0.0218341	1.35942	40	10	674	448	2.65875	0.977857	0.00641878	(0.2746814511385336, 1.681033514106603)	0.917067	2	1	rs2719491	-	-
56	chr8	39475376	39475376	-	AA	ADAM3A				0.0304569	0.0114943	1.40585	24	6	764	516	2.70157	0.993833	0.0307256	(0.09229204826588466, 1.8953746266039802)	0.917067	2	1	rs199887672	-	-
87	chr8	120490460	120490460	C	T	MTBP				0.0019305	0.0108359	-2.48877	2	7	1034	639	0.176568	-1.73405	0.0308896	(-3.308607573621358, -0.15948956475105835)	0.917067	2	1	rs200527539	-	-
6	chr19	643495	643495	G	A	FGF22	nonsynonymous SNV	FGF22:NM_020637:exon3:c.G404A:p.R135H	0.89	0.000965251	0.0108359	-3.48877	1	7	1035	639	0.0881988	-2.42816	0.0232789	(-4.525771010028684, -0.3305537907258116)	0.917067	2	1	rs143239645	['Signal Transduction', 'Signaling by FGFR', 'Signaling by FGFR1', 'FGFRL1 modulation of FGFR1 signaling', 'Signaling by Receptor Tyrosine Kinases', 'PI3K Cascade', 'IRS-mediated signalling', 'PIP3 activates AKT signaling', 'FGFR2 ligand binding and activation', 'FGFR1 ligand binding and activation', 'FGFR1b ligand binding and activation', 'FGFR2b ligand binding and activation', 'Negative regulat…	1
68	chr19	11192783	11192783	-	C	KANK2				0.0173745	0.00464396	1.90354	18	3	1018	643	3.78978	1.33231	0.033212	(0.10607555093268495, 2.5585424417777265)	0.917067	2	1	rs755583592	-	-
72	chr19	11868013	11868013	G	T	ZNF439	nonsynonymous SNV	ZNF439:NM_001348724:exon3:c.G536T:p.R179I,ZNF439:NM_001348725:exon3:c.G536T:p.R179I,ZNF439:NM_152262:exon3:c.G944T:p.R315I,ZNF439:NM_001348718:exon4:c.G968T:p.R323I,ZNF439:NM_001348719:exon4:c.G959T:p.R320I,ZNF439:NM_001348721:exon4:c.G905T:p.R302I,ZNF439:NM_001348722:exon4:c.G803T:p.R268I,ZNF439:NM_001348720:exon5:c.G905T:p.R302I,ZNF439:NM_001348723:exon5:c.G803T:p.R268I	3.566	0.011583	0.0294118	-1.34438	12	19	1024	627	0.386719	-0.950058	0.0106949	(-1.6795654865550822, -0.22054970213486103)	0.917067	2	1	rs112352083	['Generic Transcription Pathway', 'RNA Polymerase II Transcription', 'Gene expression (Transcription)']	-
83	chr19	14564335	14564335	A	C	TECR				0.00386847	0.0154799	-2.00056	4	10	1030	636	0.24699	-1.39841	0.0185129	(-2.5621416958560994, -0.23467080365932946)	0.917067	2	1	rs868534964	['Metabolism', 'Metabolism of lipids', 'Fatty acyl-CoA biosynthesis', 'Synthesis of very long-chain fatty acyl-CoAs', 'Fatty acid metabolism']	27
88	chr19	15197454	15197454	G	C	NOTCH3				0.0206693	0.0501618	-1.2791	21	31	995	587	0.399643	-0.917183	0.00141505	(-1.4804318496311524, -0.35393351855328625)	0.917067	2	1	rs542120843	['Signaling by NOTCH', 'Signal Transduction', 'Disease', 'Pre-NOTCH Processing in the Endoplasmic Reticulum', 'Pre-NOTCH Transcription and Translation', 'Pre-NOTCH Processing in Golgi', 'Pre-NOTCH Expression and Processing', 'Generic Transcription Pathway', 'Notch-HLH transcription pathway', 'Diseases of glycosylation', 'Diseases associated with O-glycosylation of proteins', 'Defective LFNG cause…	1
105	chr19	18869246	18869248	GCC	-	GDF1	nonframeshift deletion	GDF1:NM_001492:exon8:c.468_470del:p.A158del		0.0189621	0.00664452	1.51288	19	4	983	598	2.88962	1.06113	0.0548091	(-0.021868893823060898, 2.1441213975230897)	0.917067	2	1	rs775830151	['Signaling by NODAL', 'Developmental Biology']	2
163	chr19	38736606	38736606	-	CGGGGCAGGGGAGAGAGGGGCGTCGGGGCAGGGGAGAGA	CAPN12				0.00389105	0.0139319	-1.84016	4	9	1024	637	0.276476	-1.28563	0.0330136	(-2.4675695199270224, -0.10369521256021597)	0.917067	2	1		['Degradation of the extracellular matrix', 'Extracellular matrix organization']	-
168	chr19	39883288	39883288	C	0	FCGBP				0.0173745	0.00621118	1.48403	18	4	1018	640	2.82908	1.03995	0.0609918	(-0.047962717336577754, 2.127863469375624)	0.917067	2	1		-	-
174	chr19	42091302	42091302	G	A	POU2F2				0.0164093	0.00309598	2.40604	17	2	1019	644	5.37193	1.68119	0.0248412	(0.21270823225930635, 3.1496674804964933)	0.917067	2	1	rs146890196	['RNA polymerase II transcribes snRNA genes', 'RNA Polymerase II Transcription', 'Gene expression (Transcription)']	0
214	chr19	52384350	52384350	G	A	ZNF880	nonsynonymous SNV	ZNF880:NM_001145434:exon4:c.G770A:p.R257Q	0.735	0.0357143	0.0139319	1.35811	37	9	999	637	2.6214	0.963708	0.0101957	(0.22850224044612866, 1.6989141840170987)	0.917067	2	1	rs78052167	-	-
228	chr19	53809552	53809552	T	A	NLRP12				0.003861	0.0139319	-1.85134	4	9	1032	637	0.274332	-1.29341	0.0319652	(-2.4753393581234224, -0.11148965524792609)	0.917067	2	1		-	-
232	chr19	54455378	54455378	G	C	LENG8	nonsynonymous SNV	LENG8:NM_052925:exon8:c.G836C:p.R279P	27.2	0.0431034	0.0166667	1.37084	40	10	888	590	2.65766	0.977445	0.00625788	(0.27671748547182506, 1.6781728245831449)	0.917067	2	1	rs35061854	-	-
1	chr11	640090	640090	G	C	DRD4	nonsynonymous SNV	DRD4:NM_000797:exon3:c.G841C:p.A281P	0.976	0.465909	0.235294	0.985583	41	8	47	26	2.83511	1.04208	0.0226827	(0.14577702758768718, 1.9383818950841047)	0.917067	2	1	rs3889692	['Signal Transduction', 'Signaling by GPCR', 'Class A/1 (Rhodopsin-like receptors)', 'Amine ligand-binding receptors', 'GPCR downstream signalling', 'Dopamine receptors', 'G alpha (i) signalling events', 'GPCR ligand binding']	7
21	chr11	6260104	6260104	C	T	CCKBR				0.0135135	0.0340557	-1.33349	14	22	1022	624	0.388543	-0.945352	0.00623598	(-1.622785382921661, -0.2679176693528972)	0.917067	2	1	rs185132447	['Signal Transduction', 'Signaling by GPCR', 'Class A/1 (Rhodopsin-like receptors)', 'Peptide ligand-binding receptors', 'GPCR downstream signalling', 'G alpha (q) signalling events', 'GPCR ligand binding', 'Gastrin-CREB signalling pathway via PKC and MAPK']	7
22	chr11	6320167	6320167	C	T	CAVIN3	nonsynonymous SNV	CAVIN3:NM_145040:exon1:c.G310A:p.A104T	25.9	0.00965251	0.0247678	-1.35949	10	16	1026	630	0.383772	-0.957707	0.0184099	(-1.7539974382965955, -0.16141623288514773)	0.917067	2	1	rs10839551	-	-
32	chr11	11930641	11930641	G	A	USP47				0.0144788	0.00154799	3.22547	15	1	1021	645	9.476	2.24876	0.0296468	(0.2221215689601741, 4.275403830506461)	0.917067	2	1	rs7113259	['Metabolism of proteins', 'Deubiquitination', 'Ub-specific processing proteases', 'Post-translational protein modification']	-
37	chr11	18188933	18188933	T	C	MRGPRX4;SLC25A51P4				0.974903	0.989164	-0.0209505	1010	639	26	7	0.425545	-0.854385	0.0463185	(-1.6948275842553513, -0.01394288276144573)	0.917067	2	1	rs2445150	-	-
42	chr11	20947424	20947424	G	A	NELL1	nonsynonymous SNV	NELL1:NM_001288714:exon10:c.G989A:p.R330H,NELL1:NM_006157:exon11:c.G1160A:p.R387H,NELL1:NM_201551:exon11:c.G1160A:p.R387H,NELL1:NM_001288713:exon12:c.G1244A:p.R415H	26.2	0.003861	0.0123839	-1.68142	4	8	1032	638	0.309109	-1.17406	0.0560322	(-2.3783429173710866, 0.030217230857760624)	0.917067	2	1	rs141323787	-	-
61	chr11	57491720	57491720	C	G	SLC43A1	nonsynonymous SNV	SLC43A1:NM_001198810:exon9:c.G1014C:p.E338D,SLC43A1:NM_003627:exon9:c.G1014C:p.E338D	11.08	0.003861	0.0123839	-1.68142	4	8	1032	638	0.309109	-1.17406	0.0560322	(-2.3783429173710866, 0.030217230857760624)	0.917067	2	1	rs35730224	['Amino acid transport across the plasma membrane', 'Transport of small molecules', 'Transport of inorganic cations/anions and amino acids/oligopeptides', 'SLC-mediated transmembrane transport']	-
104	chr11	83273728	83273728	A	-	CCDC90B				0.00579151	0.0154799	-1.41838	6	10	1030	636	0.370485	-0.992941	0.0556562	(-2.0098770393907155, 0.02399475609161561)	0.917067	2	1	rs746910132	-	-
131	chr11	108227849	108227849	C	G	ATM	nonsynonymous SNV	ATM:NM_000051:exon3:c.C146G:p.S49C,ATM:NM_001351835:exon3:c.C146G:p.S49C,ATM:NM_001351836:exon3:c.C146G:p.S49C,ATM:NM_001351834:exon4:c.C146G:p.S49C	25.1	0.00289575	0.0154799	-2.41838	3	10	1033	636	0.184705	-1.689	0.0105191	(-2.9829792933013395, -0.39501412690956483)	0.917067	2	1	rs1800054	['Cell Cycle', 'Generic Transcription Pathway', 'Cellular responses to stress', 'Cellular Senescence', 'DNA Damage/Telomere Stress Induced Senescence', 'Regulation of HSF1-mediated heat shock response', 'Cellular response to heat stress', 'Transcriptional Regulation by TP53', 'Regulation of TP53 Activity', 'TP53 Regulates Transcription of Cell Death Genes', 'DNA Double-Strand Break Repair', 'Homo…	0
137	chr11	113804932	113804932	T	C	USP28	nonsynonymous SNV	USP28:NM_001346268:exon16:c.A1516G:p.K506E,USP28:NM_001301029:exon17:c.A2044G:p.K682E,USP28:NM_001346259:exon18:c.A2341G:p.K781E,USP28:NM_001346260:exon18:c.A2143G:p.K715E,USP28:NM_001346261:exon18:c.A2140G:p.K714E,USP28:NM_001346262:exon18:c.A2044G:p.K682E,USP28:NM_001346267:exon18:c.A1516G:p.K506E,USP28:NM_001346272:exon18:c.A1363G:p.K455E,USP28:NM_001346257:exon19:c.A2437G:p.K813E,USP28:NM_001…	22.2	0.00289575	0.0123839	-2.09646	3	8	1033	638	0.231607	-1.46271	0.0311916	(-2.7932804088672274, -0.13214646870592084)	0.917067	2	1	rs61760222	['Metabolism of proteins', 'Deubiquitination', 'Ub-specific processing proteases', 'Post-translational protein modification']	0
141	chr11	118630029	118630031	TTT	-	PHLDB1				0.023166	0.00928793	1.31858	24	6	1012	640	2.52964	0.928079	0.0432814	(0.028021962574456882, 1.828135412677938)	0.917067	2	1	rs782227950	-	-
155	chr11	124868777	124868777	G	A	ROBO3			1.781	0.003861	0.0139319	-1.85134	4	9	1032	637	0.274332	-1.29341	0.0319652	(-2.4753393581234224, -0.11148965524792609)	0.917067	2	1	rs199817230	['Developmental Biology', 'Signaling by ROBO receptors', 'Axon guidance', 'ROBO receptors bind AKAP5', 'Nervous system development']	3
30	chr13	52465412	52465412	C	T	CKAP2	nonsynonymous SNV	CKAP2:NM_001098525:exon6:c.C1426T:p.P476S,CKAP2:NM_001286686:exon6:c.C1279T:p.P427S,CKAP2:NM_001286687:exon6:c.C1423T:p.P475S,CKAP2:NM_018204:exon6:c.C1423T:p.P475S	20.4	0.00579151	0.0154799	-1.41838	6	10	1030	636	0.370485	-0.992941	0.0556562	(-2.0098770393907155, 0.02399475609161561)	0.917067	2	1	rs143514154	-	-
64	chrX	48911594	48911594	G	T	SLC35A2	nonsynonymous SNV	SLC35A2:NM_001032289:exon1:c.C43A:p.P15T,SLC35A2:NM_001042498:exon1:c.C43A:p.P15T,SLC35A2:NM_001282647:exon1:c.C43A:p.P15T,SLC35A2:NM_001282649:exon1:c.C43A:p.P15T,SLC35A2:NM_001282650:exon1:c.C43A:p.P15T,SLC35A2:NM_001282651:exon1:c.C43A:p.P15T,SLC35A2:NM_005660:exon1:c.C43A:p.P15T	7.326	0.0135135	0.0309598	-1.19599	14	20	1022	626	0.428767	-0.846841	0.0161802	(-1.5370283751060279, -0.1566543120985392)	0.917067	2	1	rs55719932	['Transport of small molecules', 'Transport of vitamins, nucleosides, and related molecules', 'SLC-mediated transmembrane transport', 'Transport of nucleotide sugars', 'Disease', 'Defective SLC35A2 causes congenital disorder of glycosylation 2M (CDG2M)', 'SLC transporter disorders', 'Disorders of transmembrane transporters']	-
81	chrX	55090033	55090033	C	G	PAGE2	nonsynonymous SNV	PAGE2:NM_207339:exon2:c.C13G:p.L5V	0.001	0.989382	0.978328	0.0162095	1025	632	11	14	2.06415	0.724721	0.0743094	(-0.07116855062614469, 1.5206096591112228)	0.917067	2	1	rs1845444	-	-
101	chrX	72593342	72593342	T	-	PHKA1				0.0222008	0.00928793	1.25718	23	6	1013	640	2.42185	0.884531	0.0551186	(-0.019380925200029986, 1.7884437628122885)	0.917067	2	1	rs782311825	['Metabolism', 'Glycogen breakdown (glycogenolysis)', 'Metabolism of carbohydrates', 'Glycogen metabolism']	-
41	chr15	34355611	34355611	C	T	NUTM1	nonsynonymous SNV	NUTM1:NM_001284293:exon7:c.C1573T:p.R525W,NUTM1:NM_001284292:exon8:c.C1603T:p.R535W,NUTM1:NM_175741:exon8:c.C1519T:p.R507W	19.43	0.0212355	0.00928793	1.19305	22	6	1014	640	2.31427	0.839093	0.0701369	(-0.0690070190940858, 1.747192971759786)	0.917067	2	1	rs78073896	-	-
52	chr15	41505944	41505944	C	T	LTK	nonsynonymous SNV	LTK:NM_206961:exon11:c.G1420A:p.D474N,LTK:NM_002344:exon12:c.G1603A:p.D535N	23.7	0.027027	0.0123839	1.12594	28	8	1008	638	2.21528	0.795378	0.049021	(0.003412288270714714, 1.5873433181469734)	0.917067	2	1	rs35932273	-	6
59	chr15	43279265	43279265	G	A	TGM7	nonsynonymous SNV	TGM7:NM_052955:exon11:c.C1691T:p.P564L	22.8	0.0395753	0.0185759	1.09117	41	12	995	634	2.17705	0.777972	0.0191592	(0.12702191884332914, 1.428921349546552)	0.917067	2	1	rs148818002	-	-
61	chr15	43441532	43441532	A	G	TP53BP1	nonsynonymous SNV	TP53BP1:NM_001141979:exon15:c.T3092C:p.V1031A,TP53BP1:NM_001141980:exon15:c.T3092C:p.V1031A,TP53BP1:NM_005657:exon15:c.T3077C:p.V1026A,TP53BP1:NM_001355001:exon16:c.T212C:p.V71A	23.9	0.0173745	0.00464396	1.90354	18	3	1018	643	3.78978	1.33231	0.033212	(0.10607555093268495, 2.5585424417777265)	0.917067	2	1	rs45482998	['Cell Cycle', 'SUMOylation', 'SUMO E3 ligases SUMOylate target proteins', 'SUMOylation of transcription factors', 'Metabolism of proteins', 'DNA Double-Strand Break Repair', 'Homology Directed Repair', 'Recruitment and ATM-mediated phosphorylation of repair and signaling proteins at DNA double strand breaks', 'HDR through Homologous Recombination (HRR) or Single Strand Annealing (SSA)', 'DNA Dou…	0
103	chr15	74180181	74180181	C	T	STRA6	nonsynonymous SNV	STRA6:NM_001142617:exon19:c.G1903A:p.G635S,STRA6:NM_001142618:exon19:c.G1903A:p.G635S,STRA6:NM_001142619:exon19:c.G1876A:p.G626S,STRA6:NM_001199040:exon19:c.G2014A:p.G672S,STRA6:NM_001199041:exon19:c.G1948A:p.G650S,STRA6:NM_001199042:exon19:c.G2020A:p.G674S,STRA6:NM_022369:exon19:c.G1903A:p.G635S	0.013	0.0183398	0.00464396	1.98155	19	3	1017	643	4.00426	1.38736	0.0260258	(0.16571265521014578, 2.609005382164633)	0.917067	2	1	rs145614612	['Visual phototransduction', 'The canonical retinoid cycle in rods (twilight vision)', 'Sensory Perception', 'Disease', 'Retinoid cycle disease events', 'Diseases associated with visual transduction', 'Diseases of the neuronal system']	5
110	chr15	75689971	75689971	C	T	CSPG4	nonsynonymous SNV	CSPG4:NM_001897:exon3:c.G1094A:p.R365Q	6.326	0.00579151	0.0185759	-1.68142	6	12	1030	634	0.307767	-1.17841	0.019032	(-2.1633759412728044, -0.1934486734199975)	0.917067	2	1	rs138025998	['Metabolism', 'Glycosaminoglycan metabolism', 'Heparan sulfate/heparin (HS-GAG) metabolism', 'Chondroitin sulfate/dermatan sulfate metabolism', 'A tetrasaccharide linker sequence is required for GAG synthesis', 'Chondroitin sulfate biosynthesis', 'Dermatan sulfate biosynthesis', 'CS/DS degradation', 'Metabolism of carbohydrates', 'Disease', 'Diseases associated with glycosaminoglycan metabolism'…	6
122	chr15	82345122	82345122	C	0	GOLGA6L10				0.00776699	0.0201238	-1.37348	8	13	1022	633	0.381153	-0.964554	0.0329211	(-1.850842270065564, -0.07826605873678516)	0.917067	2	1		-	-
64	chr10	74525437	74525437	T	G	LOC102723439				0.015444	0.00464396	1.73362	16	3	1020	643	3.36209	1.21256	0.0547126	(-0.024496917155300668, 2.449623420217249)	0.917067	2	1	rs45529443	-	-
72	chr10	79848795	79848795	G	A	NUTM2E	nonsynonymous SNV	NUTM2E:NM_001355263:exon5:c.G1634A:p.G545D	0.003	0.0787293	0.0311203	1.33904	57	15	667	467	2.66057	0.97854	0.000961855	(0.3976130889225058, 1.5594674680487228)	0.917067	2	1	rs9420350	-	-
73	chr10	79848797	79848797	A	G	NUTM2E	nonsynonymous SNV	NUTM2E:NM_001355263:exon5:c.A1636G:p.K546E	0.001	0.0125348	0.0311203	-1.31192	9	15	709	467	0.395205	-0.928352	0.0292493	(-1.762959567535947, -0.09374421772249475)	0.917067	2	1	rs371009764	-	-
82	chr10	88743242	88743242	T	G	LIPK				0.00772201	0.0201238	-1.38186	8	13	1028	633	0.378928	-0.970408	0.0318715	(-1.8566835687118217, -0.08413211059344783)	0.917067	2	1	rs118108584	['Developmental Biology', 'Keratinization', 'Formation of the cornified envelope']	-
97	chr10	95219888	95219888	C	T	ACSM6				0.015444	0.00309598	2.31858	16	2	1020	644	5.05098	1.61958	0.0311934	(0.14630312086344, 3.0928616021483073)	0.917067	2	1	rs150021883	['Metabolism', 'Metabolism of lipids', 'mitochondrial fatty acid beta-oxidation of saturated fatty acids', 'Mitochondrial Fatty Acid Beta-Oxidation', 'Beta oxidation of butanoyl-CoA to acetyl-CoA', 'Fatty acid metabolism']	-
117	chr10	102228508	102228508	G	A	ELOVL3	nonsynonymous SNV	ELOVL3:NM_152310:exon3:c.G325A:p.D109N	0.034	0.0328185	0.0123839	1.40604	34	8	1002	638	2.70609	0.995504	0.0119842	(0.21895950933768082, 1.7720484599349313)	0.917067	2	1	rs36103207	['Metabolism', 'alpha-linolenic (omega3) and linoleic (omega6) acid metabolism', 'Linoleic acid (LA) metabolism', 'alpha-linolenic acid (ALA) metabolism', 'Metabolism of lipids', 'Fatty acyl-CoA biosynthesis', 'Synthesis of very long-chain fatty acyl-CoAs', 'Fatty acid metabolism']	27
123	chr10	113159849	113159849	T	C	TCF7L2				0.0244618	0.00928793	1.3971	25	6	997	640	2.67469	0.983834	0.0314891	(0.08730892306114024, 1.8803586010029103)	0.917067	2	1	rs11592424	['Signal Transduction', 'Degradation of beta-catenin by the destruction complex', 'Signaling by WNT', 'TCF dependent signaling in response to WNT', 'Formation of the beta-catenin:TCF transactivating complex', 'Repression of WNT target genes', 'Generic Transcription Pathway', 'Deactivation of the beta-catenin transactivating complex', 'Beta-catenin independent WNT signaling', 'Ca2+ pathway', 'RNA …	2
128	chr10	122424178	122424178	T	C	PLEKHA1				0.023166	0.00928793	1.31858	24	6	1012	640	2.52964	0.928079	0.0432814	(0.028021962574456882, 1.828135412677938)	0.917067	2	1	rs748554275	['Metabolism', 'PI Metabolism', 'Phospholipid metabolism', 'Synthesis of PIPs at the plasma membrane', 'Metabolism of lipids']	-
40	chr12	21239235	21239235	T	G	SLCO1B1				0.003861	0.0154799	-2.00335	4	10	1032	636	0.246512	-1.40035	0.0183504	(-2.5640784552165203, -0.2366137739345615)	0.917067	2	1	rs71581985	['Metabolism', 'Recycling of bile acids and salts', 'Metabolism of porphyrins', 'Heme degradation', 'Bile acid and bile salt metabolism', 'Transport of small molecules', 'Transport of vitamins, nucleosides, and related molecules', 'SLC-mediated transmembrane transport', 'Metabolism of lipids', 'Transport of organic anions', 'Metabolism of steroids', 'Disease', 'SLC transporter disorders', 'Defect…	-
45	chr12	24997203	24997203	C	G	C12orf77				0.00872093	0.0201238	-1.20635	9	13	1023	633	0.428378	-0.847749	0.0521553	(-1.7034063784758908, 0.007908130610354891)	0.917067	2	1		-	-
48	chr12	32601433	32601433	G	T	FGD4				0.000965251	0.0108359	-3.48877	1	7	1035	639	0.0881988	-2.42816	0.0232789	(-4.525771010028684, -0.3305537907258116)	0.917067	2	1	rs41276676	['Signal Transduction', 'NRAGE signals death through JNK', 'p75 NTR receptor-mediated signalling', 'Signaling by Rho GTPases', 'Cell death signalling via NRAGE, NRIF and NADE', 'Signaling by GPCR', 'GPCR downstream signalling', 'G alpha (12/13) signalling events', 'Death Receptor Signalling', 'RHO GTPase cycle', 'CDC42 GTPase cycle', 'Signaling by Rho GTPases, Miro GTPases and RHOBTB3']	-
57	chr12	50352141	50352141	T	C	FAM186A	nonsynonymous SNV	FAM186A:NM_001145475:exon4:c.A4691G:p.E1564G	0.002	0.019305	0.00619195	1.64051	20	4	1016	642	3.15945	1.1504	0.0364844	(0.07234277011595558, 2.228452405855312)	0.917067	2	1	rs34283706	-	-
121	chr12	122850399	122850399	G	A	HIP1R				0.0379747	0.0124224	1.6121	18	4	456	318	3.13816	1.14364	0.0402593	(0.0508032311998734, 2.2364687088842548)	0.917067	2	1	rs56342419	['Membrane Trafficking', 'trans-Golgi Network Vesicle Budding', 'Golgi Associated Vesicle Biogenesis', 'Vesicle-mediated transport', 'Clathrin-mediated endocytosis']	5
4	chr5	840242	840242	G	A	ZDHHC11			0.286	0.00675676	0.0154799	-1.19599	7	10	1029	636	0.432653	-0.837819	0.0907861	(-1.808745961937651, 0.1331077290723317)	0.917067	2	1	rs3822810	-	-
41	chr5	69632549	69632549	G	A	LOC101929599				0.0380859	0.0157233	1.27636	39	10	985	626	2.47858	0.907685	0.0112593	(0.2057726816156925, 1.609597884511527)	0.917067	2	1	rs879935237	-	-
91	chr5	141193952	141193952	C	G	PCDHB10	nonsynonymous SNV	PCDHB10:NM_018930:exon1:c.C1400G:p.A467G	15.97	0.00579151	0.0170279	-1.55589	6	11	1030	635	0.336275	-1.08982	0.0326124	(-2.0894477042967514, -0.09020206750585924)	0.917067	2	1	rs146421486	-	16
101	chr5	154966736	154966736	G	A	MRPL22	nonsynonymous SNV	MRPL22:NM_001014990:exon6:c.G220A:p.G74S,MRPL22:NM_014180:exon7:c.G460A:p.G154S	34	0.0328185	0.0123839	1.40604	34	8	1002	638	2.70609	0.995504	0.0119842	(0.21895950933768082, 1.7720484599349313)	0.917067	2	1	rs3749671	['Metabolism of proteins', 'Mitochondrial translation', 'Mitochondrial translation elongation', 'Mitochondrial translation termination', 'Translation', 'Mitochondrial translation initiation']	17
130	chr5	180612657	180612657	T	G	FLT4				0.011583	0.0309598	-1.41838	12	20	1024	626	0.366797	-1.00295	0.00651736	(-1.7254997897275388, -0.2803943268031508)	0.917067	2	1		['Signal Transduction', 'Signaling by VEGF', 'VEGF ligand-receptor interactions', 'VEGF binds to VEGFR leading to receptor dimerization', 'Signaling by Receptor Tyrosine Kinases', 'Signaling by NOTCH', 'Signaling by NOTCH4', 'NOTCH4 Intracellular Domain Regulates Transcription']	1
5	chr20	5302677	5302677	A	C	PROKR2	nonsynonymous SNV	PROKR2:NM_144773:exon3:c.T518G:p.L173R	24.9	0.00482625	0.0139319	-1.52941	5	9	1031	637	0.343248	-1.0693	0.0562219	(-2.1669703978131998, 0.028367411119366803)	0.917067	2	1	rs74315416	['Signal Transduction', 'Signaling by GPCR', 'Class A/1 (Rhodopsin-like receptors)', 'Peptide ligand-binding receptors', 'GPCR downstream signalling', 'G alpha (q) signalling events', 'GPCR ligand binding']	7
13	chr20	19281052	19281052	C	T	SLC24A3	nonsynonymous SNV	SLC24A3:NM_020689:exon2:c.C236T:p.A79V	6.617	0.0212355	0.00773994	1.45609	22	5	1014	641	2.78146	1.02298	0.0399581	(0.04692004422131524, 1.999031583166198)	0.917067	2	1	rs34507363	['Transport of small molecules', 'Transport of inorganic cations/anions and amino acids/oligopeptides', 'SLC-mediated transmembrane transport', 'Sodium/Calcium exchangers']	-
43	chr20	49373087	49373087	G	A	KCNB1	nonsynonymous SNV	KCNB1:NM_004975:exon2:c.C2473T:p.P825S	9.38	0.0222008	0.00928793	1.25718	23	6	1013	640	2.42185	0.884531	0.0551186	(-0.019380925200029986, 1.7884437628122885)	0.917067	2	1	rs34467662	['Neuronal System', 'Potassium Channels', 'Voltage gated Potassium channels', 'Metabolism', 'Integration of energy metabolism', 'Glucagon-like Peptide-1 (GLP1) regulates insulin secretion', 'Regulation of insulin secretion']	-
51	chr20	62309371	62309371	C	T	LAMA5	nonsynonymous SNV	LAMA5:NM_005560:exon80:c.G11053A:p.G3685R	24.4	0.019305	0.00773994	1.31858	20	5	1016	641	2.52362	0.925695	0.0654692	(-0.05926094315995878, 1.9106513229642244)	0.917067	2	1	rs138468519	['Cytokine Signaling in Immune system', 'Degradation of the extracellular matrix', 'Extracellular matrix organization', 'Signal Transduction', 'Immune System', 'Laminin interactions', 'Non-integrin membrane-ECM interactions', 'ECM proteoglycans', 'Signaling by Interleukins', 'Interleukin-4 and Interleukin-13 signaling', 'Signaling by MET', 'MET activates PTK2 signaling', 'MET promotes cell motili…	9
28	chr22	21222224	21222224	G	A	GGT2				0.0204082	0.0531915	-1.38205	10	20	480	356	0.370833	-0.992003	0.0117167	(-1.7633730722186256, -0.22063203500107664)	0.917067	2	1	rs369809990	['Metabolism', 'Phase II - Conjugation of compounds', 'Glutathione conjugation', 'Glutathione synthesis and recycling', 'Biological oxidations', 'Synthesis of Leukotrienes (LT) and Eoxins (EX)', 'Arachidonic acid metabolism', 'Aflatoxin activation and detoxification', 'Metabolism of lipids', 'Fatty acid metabolism']	-
75	chr22	39686148	39686148	C	-	CACNA1I	frameshift deletion	CACNA1I:NM_001003406:exon36:c.6310delC:p.P2104Rfs*133,CACNA1I:NM_021096:exon37:c.6415delC:p.P2139Rfs*133		0.00484496	0.0140625	-1.5373	5	9	1027	631	0.341339	-1.07488	0.0549575	(-2.172579646884105, 0.022823622305178093)	0.917067	2	1		['Developmental Biology', 'NCAM signaling for neurite out-growth', 'NCAM1 interactions', 'Axon guidance', 'Nervous system development']	15
11	chr17	2455088	2455091	TTTT	-	METTL16				0.0162272	0.00464396	1.80498	16	3	970	643	3.5354	1.26283	0.0454292	(0.025686455568785016, 2.4999637170549374)	0.917067	2	1		-	-
40	chr17	8080363	8080363	G	A	ALOX12B				0.0250965	0.0108359	1.21167	26	7	1010	639	2.34993	0.854385	0.0463185	(0.01394288276144573, 1.6948275842553513)	0.917067	2	1	rs2304906	['Metabolism', 'Synthesis of 12-eicosatetraenoic acid derivatives', 'Arachidonic acid metabolism', 'Metabolism of lipids', 'Fatty acid metabolism']	-
61	chr17	19188140	19188140	T	A	SNORD3A				0.00782779	0.0216718	-1.46914	8	14	1014	632	0.356157	-1.03238	0.0206517	(-1.9067065706323278, -0.15806258524705907)	0.917067	2	1	rs201699025	-	-
78	chr17	32041524	32041524	G	A	SH3GL1P1				0.019305	0.00773994	1.31858	20	5	1016	641	2.52362	0.925695	0.0654692	(-0.05926094315995878, 1.9106513229642244)	0.917067	2	1	rs12937850	-	-
122	chr17	50478867	50478867	C	T	RSAD1				0.0118421	0.0346939	-1.55076	9	17	751	473	0.333438	-1.0983	0.00834775	(-1.9144078010074121, -0.28219025897698546)	0.917067	2	1		-	-
159	chr17	80373040	80373040	G	A	RNF213	nonsynonymous SNV	RNF213:NM_001256071:exon49:c.G12817A:p.D4273N	29.5	0.00579151	0.0170279	-1.55589	6	11	1030	635	0.336275	-1.08982	0.0326124	(-2.0894477042967514, -0.09020206750585924)	0.917067	2	1	rs141329059	['Adaptive Immune System', 'Immune System', 'Antigen processing: Ubiquitination & Proteasome degradation', 'Class I MHC mediated antigen processing & presentation', 'Disease', 'Diseases of signal transduction by growth factor receptors and second messengers', 'Infectious disease', 'Suppression of apoptosis', 'Infection with Mycobacterium tuberculosis', 'Response of Mtb to phagocytosis', 'Signalin…	10
10	chr21	30282320	30282320	C	T	KRTAP24-1	nonsynonymous SNV	KRTAP24-1:NM_001085455:exon1:c.G613A:p.V205M	0.706	0.0202703	0.00773994	1.38897	21	5	1015	641	2.65241	0.97547	0.0511405	(-0.00483393283116984, 1.9557741142993792)	0.917067	2	1	rs78287602	['Developmental Biology', 'Keratinization']	-
35	chr6	34024665	34024665	G	T	GRM4				0.00965251	0.0232198	-1.26638	10	15	1026	631	0.410006	-0.891582	0.0302087	(-1.697854644047076, -0.08530989854825632)	0.917067	2	1	rs74692870	['Signal Transduction', 'Signaling by GPCR', 'GPCR downstream signalling', 'G alpha (i) signalling events', 'Class C/3 (Metabotropic glutamate/pheromone receptors)', 'GPCR ligand binding']	7
57	chr6	52493365	52493365	-	ATATATATATATATATAT	EFHC1				0.0134021	0.0295031	-1.13841	13	19	957	625	0.446846	-0.805541	0.0267254	(-1.5181697891961519, -0.09291293764676267)	0.917067	2	1	rs150550566	-	-
64	chr6	70300414	70300414	C	T	COL9A1				0.00482625	0.0170279	-1.81892	5	11	1031	635	0.279958	-1.27312	0.0187651	(-2.334856356377168, -0.21137733459990948)	0.917067	2	1	rs183387139	['Extracellular matrix organization', 'Collagen formation', 'Signal Transduction', 'Collagen biosynthesis and modifying enzymes', 'Signaling by PDGF', 'Assembly of collagen fibrils and other multimeric structures', 'Collagen chain trimerization', 'Signaling by Receptor Tyrosine Kinases', 'Developmental Biology', 'Collagen degradation', 'Degradation of the extracellular matrix', 'Integrin cell sur…	6
53	chr7	38869159	38869159	G	C	VPS41	nonsynonymous SNV	VPS41:NM_014396:exon3:c.C155G:p.T52R,VPS41:NM_080631:exon3:c.C155G:p.T52R	28.8	0.000965251	0.0108359	-3.48877	1	7	1035	639	0.0881988	-2.42816	0.0232789	(-4.525771010028684, -0.3305537907258116)	0.917067	2	1	rs147210031	-	30
88	chr7	75515811	75515811	C	A	PMS2P3				0.000965251	0.00928793	-3.26638	1	6	1035	640	0.10306	-2.27245	0.0355882	(-4.391744058896655, -0.15315193825095808)	0.917067	2	1	rs142522525	-	0
96	chr7	87907873	87907873	A	G	DBF4	nonsynonymous SNV	DBF4:NM_001318060:exon11:c.A1036G:p.K346E,DBF4:NM_001318061:exon12:c.A1063G:p.K355E,DBF4:NM_001318062:exon12:c.A955G:p.K319E,DBF4:NM_006716:exon12:c.A1735G:p.K579E	23.7	0.00675676	0.0185759	-1.45903	7	12	1029	634	0.35941	-1.02329	0.0323889	(-1.9606769042685026, -0.08590365999051885)	0.917067	2	1	rs61747462	['Cell Cycle', 'Activation of ATR in response to replication stress', 'Mitotic G1 phase and G1/S transition', 'Activation of the pre-replicative complex', 'DNA Replication Pre-Initiation', 'G1/S Transition', 'Cell Cycle, Mitotic', 'DNA Replication', 'G2/M Checkpoints', 'Cell Cycle Checkpoints']	-
97	chr7	89334747	89334747	A	C	ZNF804B	nonsynonymous SNV	ZNF804B:NM_181646:exon4:c.A1765C:p.K589Q	0.031	0.015444	0.0325077	-1.07374	16	21	1020	625	0.466853	-0.76174	0.0232647	(-1.4197143309594422, -0.10376561309167154)	0.917067	2	1	rs80006813	['Generic Transcription Pathway', 'RNA Polymerase II Transcription', 'Gene expression (Transcription)']	-
122	chr7	102353422	102353422	T	A	SPDYE6				0.0108959	0.0254545	-1.22414	9	14	817	536	0.421752	-0.863338	0.04509	(-1.7077827597023472, -0.01889261243413365)	0.917067	2	1	rs375422182	-	-
131	chr7	105548549	105548549	G	A	RINT1				0.00868726	0.0185759	-1.09646	9	12	1027	634	0.462999	-0.77003	0.0827548	(-1.6399440453840424, 0.09988338949781572)	0.917067	2	1	rs113947297	['Membrane Trafficking', 'Vesicle-mediated transport', 'COPI-dependent Golgi-to-ER retrograde traffic', 'Intra-Golgi and retrograde Golgi-to-ER traffic', 'Golgi-to-ER retrograde transport']	4
132	chr7	106112417	106112417	G	A	SYPL1				0.00965251	0.0247678	-1.35949	10	16	1026	630	0.383772	-0.957707	0.0184099	(-1.7539974382965955, -0.16141623288514773)	0.917067	2	1	rs542494618	-	-
136	chr7	107701183	107701183	T	C	SLC26A4	nonsynonymous SNV	SLC26A4:NM_000441:exon16:c.T1790C:p.L597S	29.3	0.00482625	0.0154799	-1.68142	5	10	1031	636	0.308438	-1.17623	0.0324797	(-2.2542885868402847, -0.09817761563328187)	0.917067	2	1	rs55638457	['Transport of small molecules', 'Transport of inorganic cations/anions and amino acids/oligopeptides', 'SLC-mediated transmembrane transport', 'Multifunctional anion exchangers', 'Disease', 'Defective SLC26A4 causes Pendred syndrome (PDS)', 'SLC transporter disorders', 'Disorders of transmembrane transporters']	32
152	chr7	138722001	138722001	C	A	ATP6V0A4	nonsynonymous SNV	ATP6V0A4:NM_130840:exon18:c.G2035T:p.D679Y,ATP6V0A4:NM_130841:exon18:c.G2035T:p.D679Y,ATP6V0A4:NM_020632:exon19:c.G2035T:p.D679Y	19.09	0.00965251	0.0216718	-1.16684	10	14	1026	632	0.439989	-0.821006	0.0490343	(-1.6385376213327187, -0.0034741150774204588)	0.917067	2	1	rs150777839	['ROS and RNS production in phagocytes', 'Signal Transduction', 'Innate Immune System', 'Immune System', 'Transport of small molecules', 'Signaling by Insulin receptor', 'Insulin receptor recycling', 'Signaling by Receptor Tyrosine Kinases', 'Iron uptake and transport', 'Transferrin endocytosis and recycling', 'Ion channel transport']	26
169	chr7	148614148	148614148	C	T	C7orf33	nonsynonymous SNV	C7orf33:NM_145304:exon2:c.C311T:p.T104M	0.022	0.00965251	0.0216718	-1.16684	10	14	1026	632	0.439989	-0.821006	0.0490343	(-1.6385376213327187, -0.0034741150774204588)	0.917067	2	1	rs73463436	-	-
178	chr7	151087173	151087173	G	A	AGAP3				0.0183752	0.00465839	1.97986	19	3	1015	641	3.99967	1.38621	0.0261506	(0.16455521702861686, 2.607869294857608)	0.917067	2	1	rs543963076	-	-
180	chr7	154801337	154801337	C	A	DPP6				0.023166	0.00773994	1.58162	24	5	1012	641	3.04032	1.11196	0.024442	(0.14338454212156904, 2.080538507852639)	0.917067	2	1	rs77306823	-	-
44	chr3	57509188	57509188	G	T	DNAH12	nonsynonymous SNV	DNAH12:NM_001366028:exon6:c.C494A:p.P165Q,DNAH12:NM_198564:exon6:c.C494A:p.P165Q	12.6	0.00579151	0.0170279	-1.55589	6	11	1030	635	0.336275	-1.08982	0.0326124	(-2.0894477042967514, -0.09020206750585924)	0.917067	2	1	rs115576589	-	4
59	chr3	109337516	109337516	A	G	DPPA4	startloss	DPPA4:NM_001348929:exon1:c.T2C:p.M1?,DPPA4:NM_018189:exon1:c.T2C:p.M1?	7.427	0.023166	0.00928793	1.31858	24	6	1012	640	2.52964	0.928079	0.0432814	(0.028021962574456882, 1.828135412677938)	0.917067	2	1	rs16855561	['Developmental Biology', 'POU5F1 (OCT4), SOX2, NANOG activate genes related to proliferation', 'Transcriptional regulation of pluripotent stem cells']	-
4	chr14	20117425	20117425	C	G	OR4K17			0.045	0.0241779	0.0108359	1.15787	25	7	1009	639	2.26179	0.816155	0.0580385	(-0.02779811817725697, 1.6601083378508834)	0.917067	2	1	rs61743111	['Olfactory Signaling Pathway', 'Sensory Perception']	-
6	chr14	21941429	21941429	T	G	OR4E1;LOC105370401				0.00772201	0.0216718	-1.48877	8	14	1028	632	0.351306	-1.0461	0.0190215	(-1.9203893272613344, -0.17180435234601465)	0.917067	2	1	rs17112412	-	-
8	chr14	22902056	22902056	-	GCA	RBM23	nonframeshift insertion	RBM23:NM_001077352:exon10:c.1067_1068insTGC:p.A359_Q360insA,RBM23:NM_001308044:exon10:c.659_660insTGC:p.A223_Q224insA,RBM23:NM_001352762:exon11:c.659_660insTGC:p.A223_Q224insA,RBM23:NM_018107:exon11:c.1121_1122insTGC:p.A377_Q378insA,RBM23:NM_001077351:exon12:c.1169_1170insTGC:p.A393_Q394insA,RBM23:NM_001352765:exon12:c.1121_1122insTGC:p.A377_Q378insA,RBM23:NM_001352763:exon13:c.1169_1170insTGC:p.…		0.023166	0.00928793	1.31858	24	6	1012	640	2.52964	0.928079	0.0432814	(0.028021962574456882, 1.828135412677938)	0.917067	2	1	rs376457710	-	-
14	chr14	23392663	23392663	-	TTTTT	MYH6				0.0155039	0.0341615	-1.13974	16	22	1016	622	0.44524	-0.809142	0.0149488	(-1.4608015970640342, -0.15748293597153074)	0.917067	2	1		['Striated Muscle Contraction', 'Muscle contraction']	9
30	chr14	45246816	45246816	T	-	MIS18BP1	frameshift deletion	MIS18BP1:NM_018353:exon2:c.471delA:p.K157Nfs*24		0.0222008	0.00928793	1.25718	23	6	1013	640	2.42185	0.884531	0.0551186	(-0.019380925200029986, 1.7884437628122885)	0.917067	2	1	rs779048980	['Cell Cycle', 'Deposition of new CENPA-containing nucleosomes at the centromere', 'Chromosome Maintenance', 'Nucleosome assembly']	0
41	chr14	54411231	54411231	A	-	CDKN3				0.00970874	0.0234375	-1.27146	10	15	1020	625	0.408497	-0.895271	0.0295421	(-1.7015936370661309, -0.08894909223402825)	0.917067	2	1	rs754106708	-	-
48	chr14	58138354	58138354	C	G	ARMH4	nonsynonymous SNV	ARMH4:NM_001001872:exon2:c.G1005C:p.E335D,ARMH4:NM_001320173:exon2:c.G1005C:p.E335D	11.75	0.00965251	0.0232198	-1.26638	10	15	1026	631	0.410006	-0.891582	0.0302087	(-1.697854644047076, -0.08530989854825632)	0.917067	2	1	rs61741193	-	-
15	chr2	27026270	27026270	C	T	MAPRE3				0.0125483	0.0325077	-1.3733	13	21	1023	625	0.378206	-0.972316	0.00638935	(-1.6711186497461121, -0.2735137432081094)	0.917067	2	1	rs111374647	-	4
16	chr2	27038053	27038053	G	A	TMEM214			5.905	0.003861	0.0139319	-1.85134	4	9	1032	637	0.274332	-1.29341	0.0319652	(-2.4753393581234224, -0.11148965524792609)	0.917067	2	1	rs201995638	-	-
37	chr2	43675618	43675618	C	G	C1GALT1C1L	nonsynonymous SNV	C1GALT1C1L:NM_001101330:exon1:c.G705C:p.E235D		0.0250965	0.00928793	1.43406	26	6	1010	640	2.74587	1.0101	0.0266579	(0.11690466390572174, 1.9032946067179588)	0.917067	2	1	rs143787127	-	-
41	chr2	43781604	43781607	TTTC	0	DYNC2LI1				0.0423554	0.0172414	1.29667	41	11	927	627	2.52104	0.92467	0.00709981	(0.2514771191049068, 1.5978624188410997)	0.917067	2	1		['Organelle biogenesis and maintenance', 'Cilium Assembly', 'Intraflagellar transport']	13
57	chr2	71564202	71564202	A	G	DYSF	nonsynonymous SNV	DYSF:NM_001130976:exon23:c.A2458G:p.I820V,DYSF:NM_001130977:exon23:c.A2458G:p.I820V,DYSF:NM_001130984:exon23:c.A2461G:p.I821V,DYSF:NM_001130986:exon23:c.A2461G:p.I821V,DYSF:NM_001130455:exon24:c.A2503G:p.I835V,DYSF:NM_001130978:exon24:c.A2500G:p.I834V,DYSF:NM_001130980:exon24:c.A2551G:p.I851V,DYSF:NM_001130981:exon24:c.A2551G:p.I851V,DYSF:NM_001130983:exon24:c.A2503G:p.I835V,DYSF:NM_001130985:exo…	10.56	0.0144788	0.0340557	-1.23396	15	22	1021	624	0.416704	-0.87538	0.00974662	(-1.539177601055433, -0.21158180304725294)	0.917067	2	1	rs34671418	['Muscle contraction', 'Smooth Muscle Contraction']	34
81	chr2	100904711	100904711	-	T	NPAS2				0.019305	0.00619195	1.64051	20	4	1016	642	3.15945	1.1504	0.0364844	(0.07234277011595558, 2.228452405855312)	0.917067	2	1	rs568919086	['BMAL1:CLOCK,NPAS2 activates circadian gene expression', 'Metabolism', 'PPARA activates gene expression', 'Cellular responses to stress', 'Regulation of lipid metabolism by PPARalpha', 'Circadian Clock', 'Metabolism of lipids', 'Cellular responses to stimuli', 'Heme signaling']	2
91	chr2	113499866	113499866	A	C	FOXD4L1	nonsynonymous SNV	FOXD4L1:NM_012184:exon1:c.A610C:p.K204Q	20.6	0.018664	0.0464396	-1.31509	19	30	999	616	0.390524	-0.940266	0.0015827	(-1.5236289770708444, -0.35690345815065494)	0.917067	2	1	rs377465547	-	-
104	chr2	130632548	130632548	G	C	POTEJ	nonsynonymous SNV	POTEJ:NM_001277083:exon9:c.G1190C:p.S397T	0.001	0.0133038	0.0318792	-1.26078	12	19	890	577	0.409462	-0.892912	0.0165519	(-1.6231700403627904, -0.16265301083025996)	0.917067	2	1	rs202134345	-	-
141	chr2	201277702	201277702	-	T	CASP8				0.03861	0.0154799	1.31858	40	10	996	636	2.55422	0.937746	0.00865403	(0.23768904877569896, 1.63780228497513)	0.917067	2	1	rs781379402	['Apoptosis', 'Intrinsic Pathway for Apoptosis', 'Apoptotic cleavage of cellular proteins', 'Caspase activation via Death Receptors in the presence of ligand', 'Signal Transduction', 'Toll Like Receptor 4 (TLR4) Cascade', 'MyD88-independent TLR4 cascade ', 'Innate Immune System', 'Immune System', 'Toll-like Receptor Cascades', 'TRIF-mediated programmed cell death', 'Caspase-mediated cleavage of c…	3
144	chr2	202635357	202635359	GCG	-	FAM117B	nonframeshift deletion	FAM117B:NM_173511:exon1:c.170_172del:p.G63del		0.00967118	0.0247678	-1.3567	10	16	1024	630	0.384521	-0.955756	0.0186501	(-1.7520508098919394, -0.15946042102728042)	0.917067	2	1	rs780598073	-	-
191	chr2	240466066	240466066	G	A	GPC1	nonsynonymous SNV	GPC1:NM_002081:exon9:c.G1453A:p.G485S	21.2	0.023166	0.0108359	1.09619	24	7	1012	639	2.16488	0.772364	0.0741454	(-0.07536691939193474, 1.6200954910374463)	0.917067	2	1	rs61737165	['Hemostasis', 'Developmental Biology', 'Metabolism', 'Glycosaminoglycan metabolism', 'Heparan sulfate/heparin (HS-GAG) metabolism', 'Chondroitin sulfate/dermatan sulfate metabolism', 'Metabolism of vitamins and cofactors', 'A tetrasaccharide linker sequence is required for GAG synthesis', 'HS-GAG biosynthesis', 'HS-GAG degradation', 'Cell surface interactions at the vascular wall', 'Visual photo…	5
35	chr1	11046609	11046609	T	C	MASP2	nonsynonymous SNV	MASP2:NM_006610:exon3:c.A359G:p.D120G,MASP2:NM_139208:exon3:c.A359G:p.D120G	27.2	0.0328185	0.0139319	1.23612	34	9	1002	637	2.40164	0.876152	0.020548	(0.13475014987656653, 1.617554492538023)	0.917067	2	1	rs72550870	['Complement cascade', 'Lectin pathway of complement activation', 'Initial triggering of complement', 'Creation of C4 and C2 activators', 'Innate Immune System', 'Immune System', 'Ficolins bind to repetitive carbohydrate structures on the target cell surface', 'Creation of classical C3 convertase', 'Lectin-mediated initiation of complement cascade', 'Complement Cascade']	-
110	chr1	40515154	40515154	A	G	EXO5	nonsynonymous SNV	EXO5:NM_001346948:exon2:c.A610G:p.M204V,EXO5:NM_001346954:exon2:c.A610G:p.M204V,EXO5:NM_001346956:exon2:c.A610G:p.M204V,EXO5:NM_001346946:exon3:c.A610G:p.M204V,EXO5:NM_001346951:exon3:c.A610G:p.M204V,EXO5:NM_001346952:exon3:c.A610G:p.M204V,EXO5:NM_001346955:exon3:c.A610G:p.M204V,EXO5:NM_022774:exon3:c.A610G:p.M204V,EXO5:NM_001346947:exon4:c.A610G:p.M204V,EXO5:NM_001346949:exon4:c.A610G:p.M204V,EX…	0.001	0.027027	0.0123839	1.12594	28	8	1008	638	2.21528	0.795378	0.049021	(0.003412288270714714, 1.5873433181469734)	0.917067	2	1	rs41268067	-	-
160	chr1	109715232	109715232	C	T	GSTM5	nonsynonymous SNV	GSTM5:NM_000851:exon7:c.C559T:p.R187C	35	0.00868726	0.0232198	-1.41838	9	15	1027	631	0.368647	-0.997917	0.0187775	(-1.8302356415950511, -0.16559830071162085)	0.917067	2	1	rs150417585	['Metabolism', 'Phase II - Conjugation of compounds', 'Glutathione conjugation', 'Biological oxidations']	-
162	chr1	112918069	112918069	T	G	SLC16A1				0.000974659	0.009375	-3.26585	1	6	1025	634	0.103089	-2.27216	0.0356136	(-4.391476411168892, -0.15284040155778378)	0.917067	2	1	rs200417465	['Hemostasis', 'The citric acid (TCA) cycle and respiratory electron transport', 'Metabolism', 'Cell surface interactions at the vascular wall', 'Basigin interactions', 'Transport of small molecules', 'Transport of bile salts and organic acids, metal ions and amine compounds', 'SLC-mediated transmembrane transport', 'Proton-coupled monocarboxylate transport', 'Pyruvate metabolism', 'Pyruvate meta…	-
189	chr1	146983346	146983346	C	T	NBPF12				0.0184382	0.0420712	-1.19014	17	26	905	592	0.427709	-0.849312	0.00725959	(-1.4693520165329725, -0.22927098902939969)	0.917067	2	1		-	-
250	chr1	167434922	167434947	TTCCTCCAGCCCTTCCTCCGGAGCCC	0	CD247				0.0223735	0.00625	1.83987	23	4	1005	636	3.63881	1.29166	0.0176	(0.22523774776015348, 2.3580734475522567)	0.917067	2	1		['Adaptive Immune System', 'Innate Immune System', 'Immune System', 'Immunoregulatory interactions between a Lymphoid and a non-Lymphoid cell', 'TCR signaling', 'Phosphorylation of CD3 and TCR zeta chains', 'Translocation of ZAP-70 to Immunological synapse', 'Generation of second messenger molecules', 'Fcgamma receptor (FCGR) dependent phagocytosis', 'FCGR activation', 'Regulation of actin dynami…	1
24	chr9	33572270	33572270	T	C	ANKRD18B				0.0212355	0.00928793	1.19305	22	6	1014	640	2.31427	0.839093	0.0701369	(-0.0690070190940858, 1.747192971759786)	0.917067	2	1	rs59767716	-	-
92	chr9	114361765	114361765	G	A	AKNA	nonsynonymous SNV	AKNA:NM_001317952:exon8:c.C1706T:p.T569M,AKNA:NM_001317950:exon9:c.C2063T:p.T688M,AKNA:NM_030767:exon9:c.C2063T:p.T688M	2.984	0.00965251	0.0216718	-1.16684	10	14	1026	632	0.439989	-0.821006	0.0490343	(-1.6385376213327187, -0.0034741150774204588)	0.917067	2	1	rs45550039	-	-
97	chr9	119238776	119238776	A	G	BRINP1				0.00772201	0.0201238	-1.38186	8	13	1028	633	0.378928	-0.970408	0.0318715	(-1.8566835687118217, -0.08413211059344783)	0.917067	2	1	rs41273915	-	-
141	chr9	136671032	136671032	G	T	EGFL7				0.00059453	0.00940439	-3.98351	0	6	1010	632	0.0521452	-2.95372	0.0449129	(-5.840423830310394, -0.06702190064250191)	0.917067	2	1	rs751645228	-	-
143	chr9	136676918	136676918	A	C	AGPAT2				0.0175781	0.00619195	1.50532	18	4	1006	642	2.87177	1.05493	0.0573652	(-0.032996837122246214, 2.1428535367353465)	0.917067	2	1		['Metabolism', 'Synthesis of PA', 'Glycerophospholipid biosynthesis', 'Phospholipid metabolism', 'Innate Immune System', 'Immune System', 'Metabolism of lipids', 'Neutrophil degranulation']	-
3	chrY	5737883	5737883	C	T	PCDH11Y	nonsynonymous SNV	PCDH11Y:NM_032973:exon5:c.C3964T:p.R1322C	21.2	0.011396	0.0238095	-1.06301	8	8	694	328	0.472622	-0.749458	0.137375	(-1.738200842930179, 0.23928413868485687)	0.917067	2	1	rs199821889	-	16
14	chrY	11350939	11350939	T	A	TTTY23;GYG2P1				0.118687	0.267544	-1.17262	94	122	698	334	0.368688	-0.997804	6.06149e-11	(-1.2967338739077878, -0.6988748705900611)	8.01215e-06	2	1	rs79788750	-	-
15	chrY	11350940	11350940	A	G	TTTY23;GYG2P1				0.0210773	0.0587045	-1.47778	18	29	836	465	0.34524	-1.06352	0.000501026	(-1.662459955157893, -0.4645706040174181)	0.917067	2	1	rs76408979	-	-
5	chr4	1395029	1395029	C	G	UVSSA;NKX1-1			10.89	0.00988142	0.0251572	-1.34818	10	16	1002	620	0.386727	-0.950037	0.0193849	(-1.7464460910945947, -0.15362877460822055)	0.917067	2	1	rs200606324	-	-
10	chr4	1793349	1793349	G	C	FGFR3				0.0374449	0.0075188	2.3162	17	2	437	264	5.13501	1.63608	0.0294952	(0.1629768206335349, 3.1091873224604587)	0.917067	2	1	rs17880408	['PI3K Cascade', 'IRS-mediated signalling', 'PIP3 activates AKT signaling', 'Signal Transduction', 'Signaling by FGFR', 'FGFR3 ligand binding and activation', 'FGFR3b ligand binding and activation', 'FGFR3c ligand binding and activation', 'Negative regulation of the PI3K/AKT network', 'Signaling by Type 1 Insulin-like Growth Factor 1 Receptor (IGF1R)', 'IGF1R signaling cascade', 'IRS-related even…	1
60	chr4	87616305	87616305	G	0	DSPP				0.00775194	0.01875	-1.27426	8	12	1024	628	0.408854	-0.894397	0.0514683	(-1.7944924745106607, 0.0056989800318214545)	0.917067	2	1		['Extracellular matrix organization', 'ECM proteoglycans']	2
68	chr4	108014616	108014616	T	C	HADH				0.015444	0.00309598	2.31858	16	2	1020	644	5.05098	1.61958	0.0311934	(0.14630312086344, 3.0928616021483073)	0.917067	2	1	rs576985737	['Metabolism', 'Metabolism of lipids', 'mitochondrial fatty acid beta-oxidation of saturated fatty acids', 'Mitochondrial Fatty Acid Beta-Oxidation', 'Beta oxidation of lauroyl-CoA to decanoyl-CoA-CoA', 'Beta oxidation of decanoyl-CoA to octanoyl-CoA-CoA', 'Beta oxidation of octanoyl-CoA to hexanoyl-CoA', 'Beta oxidation of hexanoyl-CoA to butanoyl-CoA', 'Beta oxidation of butanoyl-CoA to acetyl-…	-
70	chr4	113145905	113145905	G	T	ANK2			12.95	0.003861	0.0123839	-1.68142	4	8	1032	638	0.309109	-1.17406	0.0560322	(-2.3783429173710866, 0.030217230857760624)	0.917067	2	1	rs55847200	['Developmental Biology', 'ER to Golgi Anterograde Transport', 'Membrane Trafficking', 'L1CAM interactions', 'Metabolism of proteins', 'Axon guidance', 'Interaction between L1 and Ankyrins', 'Asparagine N-linked glycosylation', 'Vesicle-mediated transport', 'Post-translational protein modification', 'COPI-mediated anterograde transport', 'Transport to the Golgi and subsequent modification', 'Nerv…	4
85	chr4	154239277	154239277	A	G	DCHS2	nonsynonymous SNV	DCHS2:NM_001358235:exon19:c.T7385C:p.V2462A	0.186	0.00579151	0.0139319	-1.26638	6	9	1030	637	0.412298	-0.88601	0.0942389	(-1.9237147008987123, 0.151695633379346)	0.917067	2	1	rs150004475	-	18
1	chr16	275772	275772	T	-	RGS11				0.915309	0.961722	-0.0713611	562	402	52	16	0.430157	-0.843605	0.00401846	(-1.4183717860045784, -0.26883868412937495)	0.917067	1	1	rs111978133	['Signal Transduction', 'Signaling by GPCR', 'GPCR downstream signalling', 'Chaperonin-mediated protein folding', 'Protein folding', 'Metabolism of proteins', 'G alpha (i) signalling events', 'Cooperation of PDCL (PhLP1) and TRiC/CCT in G-protein beta folding']	-
11	chr16	717371	717371	A	T	METRN	nonsynonymous SNV	METRN:NM_024042:exon4:c.A866T:p.E289V	26.5	0.00965251	0.0247678	-1.35949	10	16	1026	630	0.383772	-0.957707	0.0184099	(-1.7539974382965955, -0.16141623288514773)	0.917067	1	1		-	-
13	chr16	869948	869948	G	A	LMF1	nonsynonymous SNV	LMF1:NM_001352019:exon9:c.C1024T:p.R342W,LMF1:NM_001352021:exon9:c.C700T:p.R234W,LMF1:NM_022773:exon9:c.C1351T:p.R451W,LMF1:NM_001352017:exon10:c.C700T:p.R234W,LMF1:NM_001352018:exon10:c.C952T:p.R318W	24.9	0.00772201	0.0185759	-1.26638	8	12	1028	634	0.411154	-0.888787	0.0529382	(-1.7888420601649737, 0.011268860792876811)	0.917067	1	1	rs138205062	['Plasma lipoprotein assembly, remodeling, and clearance', 'Transport of small molecules', 'Assembly of active LPL and LIPC lipase complexes', 'Plasma lipoprotein remodeling']	5
14	chr16	1066445	1066445	A	G	SSTR5-AS1				0.974903	0.987616	-0.018691	1010	638	26	8	0.487099	-0.719288	0.0775098	(-1.5178834929509621, 0.07930815324869844)	0.917067	1	1	rs530518	-	-
17	chr16	1229887	1229887	T	G	TPSB2				0.0183398	0.00621118	1.56204	19	4	1017	640	2.98918	1.095	0.0474616	(0.012260229419184254, 2.1777405672842294)	0.917067	1	1	rs556745158	-	-
42	chr16	5081083	5081083	A	T	ALG1				0.00596421	0.0139319	-1.22399	6	9	1000	637	0.424667	-0.856451	0.105763	(-1.8942098081140306, 0.1813083450777524)	0.917067	1	1		['Metabolism of proteins', 'Biosynthesis of the N-glycan precursor (dolichol lipid-linked oligosaccharide, LLO) and transfer to a nascent protein', 'Asparagine N-linked glycosylation', 'Post-translational protein modification', 'Disease', 'Diseases associated with N-glycosylation of proteins', 'Diseases of glycosylation', 'Defective ALG1 causes ALG1-CDG (CDG-1k)', 'Diseases of metabolism']	-
48	chr16	11467056	11467056	G	C	LOC101927131				0.008	0.0170279	-1.08983	8	11	992	635	0.465543	-0.764552	0.101914	(-1.6807002235173685, 0.15159654449593807)	0.917067	1	1	rs193126536	-	-
50	chr16	13932150	13932150	G	A	ERCC4				0.971042	0.987616	-0.024416	1006	638	30	8	0.420481	-0.866357	0.0307834	(-1.6525314497010726, -0.08018209563377798)	0.917067	1	1	rs254942	['Formation of Incision Complex in GG-NER', 'Nucleotide Excision Repair', 'Global Genome Nucleotide Excision Repair (GG-NER)', 'Fanconi Anemia Pathway', 'DNA Repair', 'Dual Incision in GG-NER', 'Transcription-Coupled Nucleotide Excision Repair (TC-NER)', 'Dual incision in TC-NER', 'HDR through Single Strand Annealing (SSA)', 'DNA Double-Strand Break Repair', 'Homology Directed Repair', 'HDR throu…	0
56	chr16	18348591	18348591	G	A	PKD1P4-NPIPA8				0.012685	0.0227273	-0.841302	12	14	934	602	0.552463	-0.59337	0.134867	(-1.371190703531155, 0.18445135803659374)	0.917067	1	1	rs765171953	-	-
60	chr16	20465571	20465571	G	A	ACSM2A	nonsynonymous SNV	ACSM2A:NM_001308172:exon3:c.G232A:p.E78K,ACSM2A:NM_001308954:exon4:c.G232A:p.E78K	24.2	0.0318533	0.0185759	0.778014	33	12	1003	634	1.73829	0.552899	0.104826	(-0.11524646263047023, 1.2210446189380098)	0.917067	1	1	rs34655000	['Metabolism', 'Phase II - Conjugation of compounds', 'Amino Acid conjugation', 'Conjugation of carboxylic acids', 'Conjugation of salicylate with glycine', 'Conjugation of benzoate with glycine', 'Conjugation of phenylacetate with glutamine', 'Biological oxidations']	-
79	chr16	23398119	23398119	G	A	COG7	nonsynonymous SNV	COG7:NM_153603:exon14:c.C1814T:p.T605M	15.03	0.042471	0.0201238	1.07757	44	13	992	633	2.15974	0.769988	0.0160351	(0.14329483700826207, 1.3966803456237933)	0.917067	1	1	rs16940094	['Membrane Trafficking', 'Vesicle-mediated transport', 'Intra-Golgi traffic', 'Intra-Golgi and retrograde Golgi-to-ER traffic', 'ER to Golgi Anterograde Transport', 'Metabolism of proteins', 'Asparagine N-linked glycosylation', 'Post-translational protein modification', 'COPI-mediated anterograde transport', 'Transport to the Golgi and subsequent modification', 'Retrograde transport at the Trans-…	4
82	chr16	23666998	23666998	T	C	DCTN5				0.0222008	0.00619195	1.84214	23	4	1013	642	3.64413	1.29312	0.0174681	(0.22673942486679555, 2.3594938836342783)	0.917067	1	1	rs16940386	['Adaptive Immune System', 'Immune System', 'ER to Golgi Anterograde Transport', 'Membrane Trafficking', 'MHC class II antigen presentation', 'Cellular responses to stress', 'HSP90 chaperone cycle for steroid hormone receptors (SHR) in the presence of ligand', 'Metabolism of proteins', 'Asparagine N-linked glycosylation', 'Vesicle-mediated transport', 'Post-translational protein modification', 'C…	4
86	chr16	28063203	28063205	GGC	-	GSG1L	nonframeshift deletion	GSG1L:NM_001109763:exon1:c.220_222del:p.A74del,GSG1L:NM_001323900:exon1:c.220_222del:p.A74del,GSG1L:NM_001323901:exon1:c.220_222del:p.A74del		0.00943396	0.02	-1.08406	8	11	840	539	0.466667	-0.76214	0.103364	(-1.6792583965382555, 0.15497829244446137)	0.917067	1	1	rs746146565	-	-
88	chr16	28588571	28588572	TT	-	SGF29				0.00291829	0.00928793	-1.67023	3	6	1025	640	0.312195	-1.16413	0.100557	(-2.5535438434433004, 0.22529005188582807)	0.917067	1	1	rs778372181	['HATs acetylate histones', 'Chromatin modifying enzymes', 'Chromatin organization']	2
90	chr16	28651908	28651908	C	T	NPIPB8				0.026971	0.043956	-0.704655	13	16	469	348	0.602878	-0.50604	0.183008	(-1.2509003298055166, 0.2388210229054184)	0.917067	1	1	rs377173898	-	-
101	chr16	30395500	30395500	G	A	ZNF48				0.00974659	0.021875	-1.16631	10	14	1016	626	0.440101	-0.82075	0.0491209	(-1.6383404134405304, -0.0031605738785527304)	0.917067	1	1	rs143806405	-	-
108	chr16	31078020	31078020	A	G	ZNF646	nonsynonymous SNV	ZNF646:NM_014699:exon2:c.A1696G:p.T566A	0.001	0.0164093	0.0356037	-1.11752	17	23	1019	623	0.451892	-0.794311	0.0141827	(-1.429074343784661, -0.1595484288317499)	0.917067	1	1	rs35041466	-	-
115	chr16	31528098	31528098	G	A	AHSP				0.0183398	0.00773994	1.24458	19	5	1017	641	2.39508	0.873418	0.0838032	(-0.11665458106642812, 1.8634908362753275)	0.917067	1	1	rs201750353	-	-
136	chr16	69459070	69459070	-	TT	CYB5B				0.0444874	0.0201238	1.14449	46	13	988	633	2.26705	0.81848	0.010106	(0.1948103171109723, 1.4421492097367594)	0.917067	1	1		['Metabolism', 'Biological oxidations', 'Phase I - Functionalization of compounds']	-
144	chr16	72112743	72112743	T	G	DHX38			13.64	0.00965251	0.0216718	-1.16684	10	14	1026	632	0.439989	-0.821006	0.0490343	(-1.6385376213327187, -0.0034741150774204588)	0.917067	1	1	rs373424434	['Transport of Mature mRNA derived from an Intron-Containing Transcript', 'mRNA Splicing - Major Pathway', 'mRNA Splicing', "mRNA 3'-end processing", 'Transport of Mature Transcript to Cytoplasm', 'Processing of Capped Intron-Containing Pre-mRNA', 'RNA Polymerase II Transcription Termination', 'RNA Polymerase II Transcription', 'Gene expression (Transcription)', 'Metabolism of RNA']	0
145	chr16	72787720	72787722	CCG	-	ZFHX3	nonframeshift deletion	ZFHX3:NM_001164766:exon9:c.7812_7814del:p.G2613del,ZFHX3:NM_006885:exon10:c.10554_10556del:p.G3527del		0.0139442	0.0299685	-1.10378	14	19	990	615	0.457735	-0.781464	0.02813	(-1.4791021212250541, -0.08382652852154493)	0.917067	1	1	rs751575363	['Generic Transcription Pathway', 'RNA Polymerase II Transcription', 'Gene expression (Transcription)', 'Transcriptional regulation by RUNX3', 'RUNX3 regulates CDKN1A transcription']	2
146	chr16	72959011	72959011	G	C	ZFHX3	nonsynonymous SNV	ZFHX3:NM_006885:exon2:c.C1135G:p.L379V	15.64	0.00289575	0.0108359	-1.90381	3	7	1033	639	0.265109	-1.32762	0.0550094	(-2.6837119329829457, 0.02848018272433106)	0.917067	1	1	rs147445846	['Generic Transcription Pathway', 'RNA Polymerase II Transcription', 'Gene expression (Transcription)', 'Transcriptional regulation by RUNX3', 'RUNX3 regulates CDKN1A transcription']	2
147	chr16	74282396	74282396	T	C	LOC101928035;PSMD7				0.031068	0.0201238	0.626522	32	13	998	633	1.56128	0.445504	0.180682	(-0.2067694364127003, 1.097776818754503)	0.917067	1	1	rs201096835	-	-
148	chr16	74695321	74695321	C	T	MLKL	nonsynonymous SNV	MLKL:NM_001142497:exon2:c.G437A:p.R146Q,MLKL:NM_152649:exon2:c.G437A:p.R146Q	0.407	0.019305	0.00773994	1.31858	20	5	1016	641	2.52362	0.925695	0.0654692	(-0.05926094315995878, 1.9106513229642244)	0.917067	1	1	rs34515646	['Stimuli-sensing channels', 'TRP channels', 'Transport of small molecules', 'RIPK1-mediated regulated necrosis', 'Regulated Necrosis', 'Programmed Cell Death', 'Regulation of necroptotic cell death', 'Ion channel transport', 'Microbial modulation of RIPK1-mediated regulated necrosis']	-
151	chr16	79211889	79211889	A	G	WWOX			9.294	0.0723938	0.0340557	1.08797	75	22	961	624	2.2136	0.794622	0.00134584	(0.3088389982125662, 1.2804042409416927)	0.917067	1	1	rs77897021	['Signaling by ERBB4', 'Nuclear signaling by ERBB4', 'Signal Transduction', 'Generic Transcription Pathway', 'RNA Polymerase II Transcription', 'Gene expression (Transcription)', 'Transcriptional regulation by the AP-2 (TFAP2) family of transcription factors', 'Negative regulation of activity of TFAP2 (AP-2) family transcription factors', 'Activation of the TFAP2 (AP-2) family of transcription fa…	0
153	chr16	81082702	81082702	G	C	GCSH				0.0502008	0.0306122	0.713602	25	12	473	380	1.67371	0.515045	0.150108	(-0.1863895626328148, 1.216479641250213)	0.917067	1	1	rs200021264	['Metabolism', 'Glyoxylate metabolism and glycine degradation', 'Glycine degradation', 'Metabolism of amino acids and derivatives']	22
175	chr16	88822755	88822755	C	T	GALNS				0.0164093	0.0263158	-0.681418	17	17	1019	629	0.617272	-0.482446	0.164093	(-1.1620143246368058, 0.19712277159223768)	0.917067	1	1	rs79025743	['Metabolism', 'Glycosaminoglycan metabolism', 'Keratan sulfate/keratin metabolism', 'Innate Immune System', 'Immune System', 'Keratan sulfate degradation', 'Neutrophil degranulation', 'Metabolism of carbohydrates', 'Disease', 'Mucopolysaccharidoses', 'MPS IV - Morquio syndrome A', 'Diseases of carbohydrate metabolism', 'Diseases of metabolism']	-
177	chr16	88856712	88856712	T	G	GALNS				0.0135135	0.0275081	-1.02545	13	17	949	601	0.484287	-0.725078	0.0513469	(-1.4543958049947086, 0.004240103655909322)	0.917067	1	1	rs534472993	['Metabolism', 'Glycosaminoglycan metabolism', 'Keratan sulfate/keratin metabolism', 'Innate Immune System', 'Immune System', 'Keratan sulfate degradation', 'Neutrophil degranulation', 'Metabolism of carbohydrates', 'Disease', 'Mucopolysaccharidoses', 'MPS IV - Morquio syndrome A', 'Diseases of carbohydrate metabolism', 'Diseases of metabolism']	-
185	chr16	89281204	89281204	C	T	ANKRD11	nonsynonymous SNV	ANKRD11:NM_001256183:exon9:c.G5338A:p.A1780T,ANKRD11:NM_013275:exon9:c.G5338A:p.A1780T,ANKRD11:NM_001256182:exon10:c.G5338A:p.A1780T	0.024	0.0250965	0.0123839	1.01902	26	8	1010	638	2.05297	0.719288	0.0775098	(-0.07930815324869844, 1.5178834929509621)	0.917067	1	1	rs75362060	-	-
187	chr16	89770099	89770099	T	C	FANCA				0.960425	0.975232	-0.0220732	995	630	41	16	0.616338	-0.48396	0.105693	(-1.0702569473948111, 0.10233609401178612)	0.917067	1	1	rs7200990	['Fanconi Anemia Pathway', 'DNA Repair']	0
191	chr16	90011614	90011614	T	C	DBNDD1	startloss	DBNDD1:NM_001288708:exon2:c.A1G:p.M1?		0.019305	0.0417957	-1.11438	20	27	1016	619	0.451298	-0.795628	0.00787318	(-1.3824295054315363, -0.20882639037680273)	0.917067	1	1	rs77381714	-	-
1	chr8	330915	330915	C	T	ZNF596;FAM87A				0.0173745	0.0294118	-0.75942	18	19	1018	627	0.583497	-0.538716	0.105517	(-1.1910169477230688, 0.11358519222742336)	0.917067	1	1	rs117761543	-	-
2	chr8	6444585	6444585	C	A	MCPH1	nonsynonymous SNV	MCPH1:NM_001172575:exon7:c.C719A:p.P240H,MCPH1:NM_001172574:exon8:c.C863A:p.P288H,MCPH1:NM_001322042:exon8:c.C863A:p.P288H,MCPH1:NM_001322043:exon8:c.C857A:p.P286H,MCPH1:NM_001322045:exon8:c.C761A:p.P254H,MCPH1:NM_001363979:exon8:c.C863A:p.P288H,MCPH1:NM_001363980:exon8:c.C863A:p.P288H,MCPH1:NM_024596:exon8:c.C863A:p.P288H	25.1	0.0250965	0.0123839	1.01902	26	8	1010	638	2.05297	0.719288	0.0775098	(-0.07930815324869844, 1.5178834929509621)	0.917067	1	1	rs35590577	['Cell Cycle', 'Condensation of Prophase Chromosomes', 'Mitotic Prophase', 'M Phase', 'Cell Cycle, Mitotic', 'DNA replication and repair', 'Recruitment of repair and signaling proteins to double-strand breaks', 'Homologous recombination repair (HRR) of replication-independent double-strand breaks', 'Homologous recombination repair', 'Double strand break repair', 'DNA repair']	-
11	chr8	7836512	7836512	A	G	DEFB104A;DEFB104B	nonsynonymous SNV	DEFB104B:NM_001040702:exon1:c.A28G:p.I10V,DEFB104A:NM_080389:exon1:c.A28G:p.I10V	0.001	0.121212	0.0656566	0.884523	24	13	174	185	1.96286	0.674405	0.0611624	(-0.031569227673761246, 1.38037922517417)	0.917067	1	1	rs2680507	-	-
14	chr8	7972017	7972017	G	A	USP17L8	nonsynonymous SNV	USP17L8:NM_001256872:exon1:c.C1237T:p.P413S	3.346	0.745455	0.878049	-0.236181	82	72	28	10	0.406746	-0.899566	0.0253267	(-1.6879453179996653, -0.11118725986625433)	0.917067	1	1	rs374552875	['Metabolism of proteins', 'Deubiquitination', 'Ub-specific processing proteases', 'Post-translational protein modification']	-
17	chr8	8088979	8088979	A	C	MIR548I3				0.936937	0.972222	-0.0533342	208	140	14	4	0.42449	-0.856867	0.137799	(-1.9885307616112113, 0.27479613880450415)	0.917067	1	1	rs200422487	-	-
23	chr8	10687058	10687058	G	T	C8orf74				0.0202703	0.00773994	1.38897	21	5	1015	641	2.65241	0.97547	0.0511405	(-0.00483393283116984, 1.9557741142993792)	0.917067	1	1	rs150454034	-	-
34	chr8	15743653	15743653	C	G	TUSC3				0.023166	0.0139319	0.73362	24	9	1012	637	1.67852	0.517915	0.188818	(-0.254558887474839, 1.2903890049477946)	0.917067	1	1	rs2604357	['Transport of small molecules', 'Miscellaneous transport and binding events', 'Disease', 'Metabolism of proteins', 'Asparagine N-linked glycosylation', 'Infectious disease', 'Post-translational protein modification', 'SARS-CoV Infections', 'SARS-CoV-2 Infection', 'Maturation of spike protein', 'Translation of Structural Proteins']	-
36	chr8	17248262	17248264	TTT	-	VPS37A				0.0405405	0.0201238	1.01046	42	13	994	633	2.05742	0.721453	0.0248003	(0.09145868296463133, 1.351448269654235)	0.917067	1	1	rs748400567	['Membrane Trafficking', 'Vesicle-mediated transport', 'Endosomal Sorting Complex Required For Transport (ESCRT)', 'HIV Life Cycle', 'Budding and maturation of HIV virion', 'Late Phase of HIV Life Cycle', 'HIV Infection', 'Disease', 'Membrane binding and targetting of GAG proteins', 'Synthesis And Processing Of GAG, GAGPOL Polyproteins', 'Assembly Of The HIV Virion', 'Infectious disease', 'HCMV I…	-
42	chr8	22119112	22119112	A	G	HR				0.0212355	0.0139319	0.608089	22	9	1014	637	1.53561	0.428929	0.28225	(-0.3529015108368565, 1.2107602057231173)	0.917067	1	1	rs7006229	-	-
46	chr8	24349925	24349925	G	A	ADAM28	nonsynonymous SNV	ADAM28:NM_001304351:exon19:c.G2052A:p.M684I,ADAM28:NM_014265:exon19:c.G2052A:p.M684I	0.003	0.0241313	0.0139319	0.792513	25	9	1011	637	1.75019	0.559726	0.153337	(-0.20859542119374164, 1.3280467893610859)	0.917067	1	1	rs7829965	-	6
58	chr8	43083047	43083047	-	AA	FNTA				0.019305	0.00773994	1.31858	20	5	1016	641	2.52362	0.925695	0.0654692	(-0.05926094315995878, 1.9106513229642244)	0.917067	1	1		['Apoptosis', 'Apoptotic cleavage of cellular proteins', 'Signal Transduction', 'Visual phototransduction', 'The phototransduction cascade', 'Inactivation, recovery and regulation of the phototransduction cascade', 'Programmed Cell Death', 'RAF/MAP kinase cascade', 'MAPK family signaling cascades', 'MAPK1/MAPK3 signaling', 'Apoptotic execution phase', 'RAS processing', 'Sensory Perception']	-
64	chr8	60558751	60558751	A	T	RAB2A				0.00772201	0.0185759	-1.26638	8	12	1028	634	0.411154	-0.888787	0.0529382	(-1.7888420601649737, 0.011268860792876811)	0.917067	1	1	rs76795709	['Golgi Cisternae Pericentriolar Stack Reorganization', 'Cell Cycle', 'Mitotic Prophase', 'M Phase', 'Cell Cycle, Mitotic', 'Metabolism of proteins', 'Post-translational protein modification', 'RAB geranylgeranylation']	11
65	chr8	61661954	61661954	-	A	ASPH				0.019305	0.00773994	1.31858	20	5	1016	641	2.52362	0.925695	0.0654692	(-0.05926094315995878, 1.9106513229642244)	0.917067	1	1	rs776097322	['Stimuli-sensing channels', 'Transport of small molecules', 'Muscle contraction', 'Cardiac conduction', 'Ion homeostasis', 'Ion channel transport']	8
73	chr8	85655502	85655502	A	C	REXO1L2P				0.0148936	0.0336538	-1.17608	14	21	926	603	0.434125	-0.834422	0.0168006	(-1.5184071958633472, -0.15043709619096868)	0.917067	1	1		-	-
75	chr8	90005382	90005382	G	A	DECR1				0.00675676	0.0154799	-1.19599	7	10	1029	636	0.432653	-0.837819	0.0907861	(-1.808745961937651, 0.1331077290723317)	0.917067	1	1	rs188483720	['Metabolism', 'Metabolism of lipids', 'mitochondrial fatty acid beta-oxidation of unsaturated fatty acids', 'Mitochondrial Fatty Acid Beta-Oxidation', 'Fatty acid metabolism']	-
76	chr8	93735268	93735268	A	C	RBM12B	nonsynonymous SNV	RBM12B:NM_203390:exon3:c.T1143G:p.D381E	0.001	0.027027	0.0123839	1.12594	28	8	1008	638	2.21528	0.795378	0.049021	(0.003412288270714714, 1.5873433181469734)	0.917067	1	1	rs111589624	-	-
78	chr8	98089316	98089316	C	T	ERICH5	nonsynonymous SNV	ERICH5:NM_173549:exon2:c.C299T:p.S100F	23	0.00772201	0.0154799	-1.00335	8	10	1028	636	0.494942	-0.703315	0.140373	(-1.6382513098090605, 0.23162044183066577)	0.917067	1	1	rs34144950	-	-
83	chr8	102653448	102653448	A	-	KLF10				0.0144788	0.0232198	-0.681418	15	15	1021	631	0.618022	-0.481232	0.191752	(-1.2037586660060222, 0.241294754759118)	0.917067	1	1	rs557435902	-	2
86	chr8	112313866	112313866	T	C	CSMD3				0.0366795	0.0170279	1.10708	38	11	998	635	2.19803	0.787563	0.0228832	(0.1091724199161872, 1.4659527991022978)	0.917067	1	1	rs4308763	-	-
92	chr8	139932455	139932455	C	T	TRAPPC9				0.0501931	0.0309598	0.697094	52	20	984	626	1.65407	0.503236	0.0604526	(-0.022109287792292043, 1.0285811259428557)	0.917067	1	1	rs2233236	['ER to Golgi Anterograde Transport', 'Membrane Trafficking', 'COPII-mediated vesicle transport', 'Metabolism of proteins', 'Asparagine N-linked glycosylation', 'Vesicle-mediated transport', 'Post-translational protein modification', 'Transport to the Golgi and subsequent modification', 'RAB GEFs exchange GTP for GDP on RABs', 'Rab regulation of trafficking']	11
8	chr19	651684	651684	C	T	RNF126	nonsynonymous SNV	RNF126:NM_194460:exon4:c.G370A:p.A124T	23.4	0.0106178	0.0247678	-1.22199	11	16	1025	630	0.422561	-0.861422	0.0291698	(-1.6354757986878714, -0.08736724456881062)	0.917067	1	1	rs61754469	['Adaptive Immune System', 'Immune System', 'Antigen processing: Ubiquitination & Proteasome degradation', 'Class I MHC mediated antigen processing & presentation']	3
16	chr19	1627366	1627366	A	G	TCF3	nonsynonymous SNV	TCF3:NM_001136139:exon6:c.T359C:p.L120P,TCF3:NM_001351778:exon6:c.T359C:p.L120P,TCF3:NM_001351779:exon6:c.T359C:p.L120P,TCF3:NM_003200:exon6:c.T359C:p.L120P	23.8	0.0106178	0.0232198	-1.12888	11	15	1025	631	0.451447	-0.795297	0.0468784	(-1.5796160498833602, -0.010977864786910985)	0.917067	1	1	rs35354874	['Developmental Biology', 'Generic Transcription Pathway', 'Myogenesis', 'RNA Polymerase II Transcription', 'Gene expression (Transcription)', 'Transcriptional regulation by RUNX1', 'RUNX1 regulates transcription of genes involved in differentiation of HSCs']	1
20	chr19	2113274	2113274	G	A	AP3D1				0.030888	0.0139319	1.14866	32	9	1004	637	2.25587	0.813534	0.0325994	(0.067389560787946, 1.559677800780045)	0.917067	1	1	rs2240651	-	30
23	chr19	2916495	2916495	G	A	ZNF57				0.0147348	0.0247678	-0.749241	15	16	1003	630	0.588858	-0.529569	0.144574	(-1.2409877588101879, 0.1818487793823318)	0.917067	1	1	rs62125398	-	-
34	chr19	5749160	5749160	A	G	CATSPERD	nonsynonymous SNV	CATSPERD:NM_152784:exon11:c.A964G:p.I322V	0.001	0.0318533	0.0170279	0.903545	33	11	1003	635	1.8993	0.641486	0.0682597	(-0.04808647157185342, 1.3310594707695842)	0.917067	1	1	rs72983139	['Fertilization', 'Sperm Motility And Taxes', 'Reproduction']	-
35	chr19	5772328	5772328	C	T	CATSPERD				0.0331992	0.0170279	0.963251	33	11	961	635	1.98231	0.684263	0.0518317	(-0.0054314517819907815, 1.373957208963008)	0.917067	1	1	rs111994811	['Fertilization', 'Sperm Motility And Taxes', 'Reproduction']	-
41	chr19	7506207	7506207	-	AT	TEX45				0.00678295	0.0154799	-1.19041	7	10	1025	636	0.434341	-0.833924	0.0922995	(-1.8048586200508034, 0.13701007570856516)	0.917067	1	1	rs755668823	-	-
47	chr19	7641901	7641944	GCGTGCAACACCTAACCTTTAACCTCTCTTGTGACCCCAGCCCC	0	STXBP2				0.0289575	0.0123839	1.22547	30	8	1006	638	2.37823	0.866357	0.0307834	(0.08018209563377798, 1.6525314497010726)	0.917067	1	1		['Hemostasis', 'Platelet degranulation ', 'Cytokine Signaling in Immune system', 'Immune System', 'Signaling by Interleukins', 'Other interleukin signaling', 'Platelet activation, signaling and aggregation', 'Response to elevated platelet cytosolic Ca2+']	-
51	chr19	7879815	7879815	A	G	LYPLA2P2				0.0627413	0.0294118	1.09302	65	19	971	627	2.20906	0.792568	0.00286367	(0.2716419512532181, 1.3134947748883663)	0.917067	1	1	rs12459317	-	-
54	chr19	7935168	7935170	TTT	-	TIMM44				0.023166	0.00928793	1.31858	24	6	1012	640	2.52964	0.928079	0.0432814	(0.028021962574456882, 1.828135412677938)	0.917067	1	1		['Mitochondrial protein import', 'Protein localization']	20
55	chr19	8138508	8138508	G	C	FBN3	nonsynonymous SNV	FBN3:NM_001321431:exon9:c.C922G:p.L308V,FBN3:NM_032447:exon9:c.C922G:p.L308V	0.997	0.0125483	0.0263158	-1.06844	13	17	1023	629	0.470186	-0.754627	0.0424499	(-1.4835495340113032, -0.02570545768042498)	0.917067	1	1	rs61729623	['Degradation of the extracellular matrix', 'Extracellular matrix organization', 'Elastic fibre formation', 'Molecules associated with elastic fibres']	-
58	chr19	8957698	8957698	A	G	MUC16	nonsynonymous SNV	MUC16:NM_024690:exon3:c.T19072C:p.S6358P	0.002	0.0328185	0.0201238	0.705605	34	13	1002	633	1.65223	0.502128	0.128131	(-0.1446972962655262, 1.1489539115735075)	0.917067	1	1	rs61732552	['Disease', 'Innate Immune System', 'Immune System', 'Diseases of glycosylation', 'Diseases associated with O-glycosylation of proteins', 'Metabolism of proteins', 'Defective GALNT3 causes familial hyperphosphatemic tumoral calcinosis (HFTC)', 'Defective C1GALT1C1 causes Tn polyagglutination syndrome (TNPS)', 'Defective GALNT12 causes colorectal cancer 1 (CRCS1)', 'O-linked glycosylation', 'Decti…	14
61	chr19	10137042	10137042	C	T	DNMT1				0.0222008	0.0386997	-0.801712	23	25	1013	621	0.563988	-0.572722	0.0509256	(-1.1477493230514952, 0.002305260542984522)	0.917067	1	1	rs117579193	['Epigenetic regulation of gene expression', 'PRC2 methylates histones and DNA', 'SUMOylation', 'SUMO E3 ligases SUMOylate target proteins', 'Metabolism of proteins', 'SUMOylation of DNA methylation proteins', 'Post-translational protein modification', 'Gene expression (Transcription)', 'Disease', 'NoRC negatively regulates rRNA expression', 'Negative epigenetic regulation of rRNA expression', 'D…	1
64	chr19	10450586	10450586	T	-	PDE4A				0.0241313	0.0123839	0.962438	25	8	1011	638	1.97206	0.679077	0.0971218	(-0.1232078033393097, 1.4813624983646765)	0.917067	1	1	rs540629067	['Opioid Signalling', 'Signal Transduction', 'DARPP-32 events', 'Signaling by GPCR', 'GPCR downstream signalling', 'G alpha (s) signalling events', 'G alpha (i) signalling events']	-
65	chr19	10823930	10823930	-	C	DNM2				0.0250965	0.0139319	0.849097	26	9	1010	637	1.822	0.599936	0.124016	(-0.1645318779324786, 1.3644038907767198)	0.917067	1	1	rs138202845	['Developmental Biology', 'Adaptive Immune System', 'Metabolism', 'Gap junction trafficking and regulation', 'Toll Like Receptor 4 (TLR4) Cascade', 'Innate Immune System', 'Immune System', 'Toll-like Receptor Cascades', 'Gap junction trafficking', 'Gap junction degradation', 'Formation of annular gap junctions', 'Membrane Trafficking', 'trans-Golgi Network Vesicle Budding', 'Metabolism of nitric …	5
66	chr19	11060001	11060001	A	G	SMARCA4				0.0144788	0.0232198	-0.681418	15	15	1021	631	0.618022	-0.481232	0.191752	(-1.2037586660060222, 0.241294754759118)	0.917067	1	1	rs117490455	['Interleukin-7 signaling', 'Cytokine Signaling in Immune system', 'Signal Transduction', 'Immune System', 'Signaling by WNT', 'TCF dependent signaling in response to WNT', 'Formation of the beta-catenin:TCF transactivating complex', 'Generic Transcription Pathway', 'Chromatin modifying enzymes', 'Signaling by Interleukins', 'Chromatin organization', 'RNA Polymerase II Transcription', 'Gene expre…	2
73	chr19	11947526	11947526	G	A	ZNF700	nonsynonymous SNV	ZNF700:NM_001271848:exon3:c.G212A:p.S71N,ZNF700:NM_144566:exon3:c.G203A:p.S68N	0.02	0.0241313	0.0123839	0.962438	25	8	1011	638	1.97206	0.679077	0.0971218	(-0.1232078033393097, 1.4813624983646765)	0.917067	1	1	rs77752522	['Generic Transcription Pathway', 'RNA Polymerase II Transcription', 'Gene expression (Transcription)']	-
82	chr19	14386379	14386380	AA	-	ADGRE5				0.0297158	0.0551331	-0.89169	23	29	751	497	0.524863	-0.644617	0.0237774	(-1.2034807868636945, -0.08575369258596544)	0.917067	1	1	rs747651350	['Signal Transduction', 'Innate Immune System', 'Immune System', 'Signaling by GPCR', 'Class B/2 (Secretin family receptors)', 'GPCR ligand binding', 'Neutrophil degranulation']	-
85	chr19	14774031	14774031	C	T	ADGRE2	nonsynonymous SNV	ADGRE2:NM_001271052:exon3:c.G106A:p.D36N,ADGRE2:NM_013447:exon4:c.G106A:p.D36N	0.01	0.0222008	0.00928793	1.25718	23	6	1013	640	2.42185	0.884531	0.0551186	(-0.019380925200029986, 1.7884437628122885)	0.917067	1	1	rs139612102	['Signal Transduction', 'Signaling by GPCR', 'Class B/2 (Secretin family receptors)', 'GPCR ligand binding']	-
108	chr19	19935987	19935987	G	A	ZNF93				0.0377176	0.0185759	1.02181	39	12	995	634	2.07085	0.727961	0.0292932	(0.07333127353290347, 1.3825911537076543)	0.917067	1	1	rs10414795	-	-
110	chr19	21933248	21933248	-	AA	ZNF43;ZNF208				0.0183398	0.0247678	-0.43349	19	16	1017	630	0.735619	-0.307042	0.370806	(-0.9794618456397465, 0.3653772061671018)	0.917067	1	1	rs140860406	-	-
112	chr19	22073585	22073585	G	A	ZNF257				0.023166	0.0139319	0.73362	24	9	1012	637	1.67852	0.517915	0.188818	(-0.254558887474839, 1.2903890049477946)	0.917067	1	1	rs113368200	['Generic Transcription Pathway', 'RNA Polymerase II Transcription', 'Gene expression (Transcription)']	-
115	chr19	22314425	22314426	AA	-	ZNF729	frameshift deletion	ZNF729:NM_001242680:exon4:c.1008_1009del:p.K337Tfs*2		0.00675676	0.0216718	-1.68142	7	14	1029	632	0.307094	-1.1806	0.0112343	(-2.093278560249652, -0.2679224842446213)	0.917067	1	1	rs748599122	['Generic Transcription Pathway', 'RNA Polymerase II Transcription', 'Gene expression (Transcription)']	-
118	chr19	22402719	22402719	-	T	ZNF98				0.0417476	0.0247678	0.753226	43	16	987	630	1.71543	0.539661	0.0694431	(-0.04293391511085842, 1.122256261922614)	0.917067	1	1		-	-
125	chr19	29699340	29699340	G	A	C19orf12				0.00796813	0.0185759	-1.22112	8	12	996	634	0.424364	-0.857163	0.0619821	(-1.757285564442258, 0.04295874193118476)	0.917067	1	1	rs117537955	-	-
126	chr19	30007448	30007448	G	A	URI1				0.0125483	0.0263158	-1.06844	13	17	1023	629	0.470186	-0.754627	0.0424499	(-1.4835495340113032, -0.02570545768042498)	0.917067	1	1	rs143047938	-	3
132	chr19	33413543	33413543	C	A	PEPD				0.0202703	0.0108359	0.903545	21	7	1015	639	1.88867	0.635873	0.14781	(-0.2252327187153944, 1.4969784218549074)	0.917067	1	1	rs146629261	-	-
150	chr19	37153587	37153587	A	T	ZNF585A	nonsynonymous SNV	ZNF585A:NM_001288800:exon5:c.T312A:p.H104Q,ZNF585A:NM_152655:exon6:c.T147A:p.H49Q,ZNF585A:NM_199126:exon6:c.T147A:p.H49Q	11.73	0.0144788	0.0247678	-0.774527	15	16	1021	630	0.578477	-0.547357	0.131536	(-1.2587273318809522, 0.1640142920476373)	0.917067	1	1	rs62110074	['Generic Transcription Pathway', 'RNA Polymerase II Transcription', 'Gene expression (Transcription)']	-
151	chr19	37363138	37363138	G	A	ZNF875	nonsynonymous SNV	ZNF875:NM_001329773:exon4:c.G1163A:p.R388H,ZNF875:NM_001329776:exon4:c.G1160A:p.R387H,ZNF875:NM_001329761:exon5:c.G1289A:p.R430H,ZNF875:NM_001329762:exon5:c.G1289A:p.R430H,ZNF875:NM_001329764:exon5:c.G1286A:p.R429H,ZNF875:NM_001329768:exon5:c.G1247A:p.R416H,ZNF875:NM_001329769:exon5:c.G1244A:p.R415H,ZNF875:NM_001329779:exon5:c.G1001A:p.R334H,ZNF875:NM_001353803:exon5:c.G1286A:p.R429H,ZNF875:NM_00…	23.1	0.0250965	0.0139319	0.849097	26	9	1010	637	1.822	0.599936	0.124016	(-0.1645318779324786, 1.3644038907767198)	0.917067	1	1	rs2921563	['Generic Transcription Pathway', 'RNA Polymerase II Transcription', 'Gene expression (Transcription)']	-
154	chr19	38291845	38291845	G	C	SPINT2	nonsynonymous SNV	SPINT2:NM_001166103:exon6:c.G427C:p.V143L,SPINT2:NM_021102:exon7:c.G598C:p.V200L	14.54	0.0222008	0.0433437	-0.965211	23	28	1013	618	0.501128	-0.690893	0.0157057	(-1.2514493329979288, -0.13033734907616534)	0.917067	1	1	rs11548457	['Signal Transduction', 'Signaling by MET', 'MET Receptor Activation', 'Signaling by MST1', 'Signaling by Receptor Tyrosine Kinases']	-
159	chr19	38490026	38490026	C	T	RYR1				0.0395753	0.0185759	1.09117	41	12	995	634	2.17705	0.777972	0.0191592	(0.12702191884332914, 1.428921349546552)	0.917067	1	1	rs111928389	['Stimuli-sensing channels', 'Transport of small molecules', 'Muscle contraction', 'Cardiac conduction', 'Ion homeostasis', 'Ion channel transport']	8
160	chr19	38496377	38496377	A	G	RYR1				0.023166	0.0108359	1.09619	24	7	1012	639	2.16488	0.772364	0.0741454	(-0.07536691939193474, 1.6200954910374463)	0.917067	1	1	rs73930595	['Stimuli-sensing channels', 'Transport of small molecules', 'Muscle contraction', 'Cardiac conduction', 'Ion homeostasis', 'Ion channel transport']	8
167	chr19	39877858	39877861	AAAG	0	FCGBP				0.0464217	0.0232919	0.994968	48	15	986	629	2.04138	0.713626	0.0174362	(0.12529680950353306, 1.3019546143034404)	0.917067	1	1		-	-
170	chr19	40810444	40810444	A	G	CYP2T1P				0.042471	0.0185759	1.19305	44	12	992	634	2.34341	0.851609	0.00977615	(0.20557557182889952, 1.4976420907363286)	0.917067	1	1	rs577755889	-	-
178	chr19	43353892	43353892	A	T	CD177	nonsynonymous SNV	CD177:NM_020406:exon2:c.A92T:p.H31L	0.001	0.0444015	0.0216718	1.03479	46	14	990	632	2.09755	0.740769	0.0166742	(0.1342551963652292, 1.3472818394188881)	0.917067	1	1	rs45553433	['Hemostasis', 'Innate Immune System', 'Immune System', 'Cell surface interactions at the vascular wall', 'Neutrophil degranulation', 'Common Pathway of Fibrin Clot Formation', 'Formation of Fibrin Clot (Clotting Cascade)']	-
182	chr19	44635371	44635374	TCTC	0	IGSF23				0.0164093	0.00619195	1.40604	17	4	1019	642	2.67763	0.98493	0.0775449	(-0.10872704384579412, 2.0785875506529172)	0.917067	1	1		-	-
187	chr19	45251545	45251545	G	C	MARK4				0.0380795	0.0767045	-1.0103	23	27	581	325	0.476509	-0.741268	0.0111534	(-1.3137434466268356, -0.16879300256787044)	0.917067	1	1	rs747894589	['Organelle biogenesis and maintenance', 'Cilium Assembly', 'Anchoring of the basal body to the plasma membrane']	4
189	chr19	45626741	45626741	C	A	EML2	nonsynonymous SNV	EML2:NM_001352051:exon6:c.G357T:p.E119D,EML2:NM_001352054:exon8:c.G639T:p.E213D,EML2:NM_012155:exon8:c.G705T:p.E235D,EML2:NM_001193268:exon11:c.G1308T:p.E436D,EML2:NM_001193269:exon11:c.G1146T:p.E382D,EML2:NM_001352052:exon11:c.G1305T:p.E435D,EML2:NM_001352053:exon11:c.G1143T:p.E381D	14.36	0.0415058	0.0170279	1.28542	43	11	993	635	2.49977	0.916199	0.00733069	(0.2465142810645765, 1.5858840744208447)	0.917067	1	1	rs1545040	-	-
195	chr19	48137550	48137550	C	T	LIG1	nonsynonymous SNV	LIG1:NM_001289064:exon11:c.G1022A:p.R341H,LIG1:NM_001289063:exon12:c.G1133A:p.R378H,LIG1:NM_001320971:exon12:c.G1136A:p.R379H,LIG1:NM_000234:exon13:c.G1226A:p.R409H,LIG1:NM_001320970:exon13:c.G1223A:p.R408H	23.5	0.0202703	0.00928793	1.12594	21	6	1015	640	2.2069	0.791587	0.0891407	(-0.12107737023846987, 1.7042518769848662)	0.917067	1	1	rs4987068	['Cell Cycle', 'Mismatch Repair', 'Mismatch repair (MMR) directed by MSH2:MSH6 (MutSalpha)', 'Mismatch repair (MMR) directed by MSH2:MSH3 (MutSbeta)', 'Nucleotide Excision Repair', 'Transcription-Coupled Nucleotide Excision Repair (TC-NER)', 'Gap-filling DNA repair synthesis and ligation in TC-NER', 'Processive synthesis on the lagging strand', 'Lagging Strand Synthesis', 'DNA strand elongation',…	0
199	chr19	49168250	49168250	G	A	TRPM4				0.0212355	0.00773994	1.45609	22	5	1014	641	2.78146	1.02298	0.0399581	(0.04692004422131524, 1.999031583166198)	0.917067	1	1	rs78444754	['Stimuli-sensing channels', 'TRP channels', 'Transport of small molecules', 'Ion channel transport']	-
206	chr19	49832035	49832035	A	T	MIR6800				0.0453668	0.0216718	1.06582	47	14	989	632	2.14531	0.763285	0.0134156	(0.15823531632014098, 1.3683353529177493)	0.917067	1	1		-	-
210	chr19	50267007	50267007	A	T	MYH14	nonsynonymous SNV	MYH14:NM_024729:exon21:c.A2702T:p.Q901L,MYH14:NM_001077186:exon22:c.A2726T:p.Q909L,MYH14:NM_001145809:exon23:c.A2825T:p.Q942L	23.1	0.0222008	0.0108359	1.03479	23	7	1013	639	2.07263	0.728817	0.0935547	(-0.12300668167597473, 1.5806407156813498)	0.917067	1	1		['Signal Transduction', 'Signaling by Rho GTPases', 'RHO GTPase Effectors', 'RHO GTPases activate PAKs', 'Signaling by Rho GTPases, Miro GTPases and RHOBTB3', 'Developmental Biology', 'EPH-Ephrin signaling', 'Semaphorin interactions', 'EPHA-mediated growth cone collapse', 'Sema4D in semaphorin signaling', 'Sema4D induced cell migration and growth-cone collapse', 'Axon guidance', 'RHO GTPases acti…	24
211	chr19	50417817	50417817	-	CCCTGC	POLD1				0.00579151	0.0154799	-1.41838	6	10	1030	636	0.370485	-0.992941	0.0556562	(-2.0098770393907155, 0.02399475609161561)	0.917067	1	1	rs3219456	['Translesion synthesis by Y family DNA polymerases bypasses lesions on DNA template', 'Recognition of DNA damage by PCNA-containing replication complex', 'Resolution of AP sites via the multiple-nucleotide patch replacement pathway', 'Telomere Maintenance', 'Cell Cycle', 'Polymerase switching on the C-strand of the telomere', 'Processive synthesis on the C-strand of the telomere', 'Telomere C-st…	0
219	chr19	52800887	52800891	TTATC	-	ZNF28	frameshift deletion	ZNF28:NM_001369762:exon3:c.795_799del:p.K265Nfs*11,ZNF28:NM_001369763:exon4:c.945_949del:p.K315Nfs*11,ZNF28:NM_001369764:exon4:c.912_916del:p.K304Nfs*11,ZNF28:NM_006969:exon4:c.954_958del:p.K318Nfs*11,ZNF28:NM_001369765:exon5:c.846_850del:p.K282Nfs*11		0.015444	0.00619195	1.31858	16	4	1020	642	2.51765	0.923325	0.0999643	(-0.1767686912640838, 2.0234182083271546)	0.917067	1	1	rs550161786	['Generic Transcription Pathway', 'RNA Polymerase II Transcription', 'Gene expression (Transcription)']	-
227	chr19	53289830	53289830	C	T	BIRC8			19.53	0.003861	0.0123839	-1.68142	4	8	1032	638	0.309109	-1.17406	0.0560322	(-2.3783429173710866, 0.030217230857760624)	0.917067	1	1	rs138004934	-	3
236	chr19	55358736	55358736	G	C	FAM71E2	nonsynonymous SNV	FAM71E2:NM_001145402:exon9:c.C2132G:p.P711R	0.001	0.972973	0.989164	-0.0238101	1008	639	28	7	0.394366	-0.930475	0.028793	(-1.7646200983772466, -0.09633063535497477)	0.917067	1	1	rs12974819	-	-
239	chr19	55772851	55772851	A	T	RFPL4AL1	nonsynonymous SNV	RFPL4AL1:NM_001277397:exon3:c.A536T:p.E179V	0.001	0.0530888	0.0247678	1.09994	55	16	981	630	2.20757	0.791892	0.00607081	(0.22625121609196508, 1.357532429533845)	0.917067	1	1	rs138919845	-	-
240	chr19	56449613	56449613	C	A	ZNF667	nonsynonymous SNV	ZNF667:NM_001321355:exon5:c.G26T:p.R9L		0.0190763	0.0108359	0.815961	19	7	977	639	1.77526	0.573947	0.19719	(-0.29835230697375825, 1.4462455718655165)	0.917067	1	1	rs139010117	['Generic Transcription Pathway', 'RNA Polymerase II Transcription', 'Gene expression (Transcription)']	-
241	chr19	57323641	57323641	A	T	ZNF543				0.0222008	0.0139319	0.672219	23	9	1013	637	1.607	0.474368	0.231447	(-0.30259515315818075, 1.251330732991)	0.917067	1	1	rs113007638	['Generic Transcription Pathway', 'RNA Polymerase II Transcription', 'Gene expression (Transcription)']	-
243	chr19	57351658	57351658	G	C	ZNF304				0.00965251	0.0216718	-1.16684	10	14	1026	632	0.439989	-0.821006	0.0490343	(-1.6385376213327187, -0.0034741150774204588)	0.917067	1	1	rs28481601	['Generic Transcription Pathway', 'RNA Polymerase II Transcription', 'Gene expression (Transcription)']	0
2	chr11	640099	640099	A	G	DRD4	nonsynonymous SNV	DRD4:NM_000797:exon3:c.A850G:p.S284G	0.032	0.808824	0.666667	0.278859	55	24	13	12	2.11538	0.749237	0.110266	(-0.17028708319440666, 1.6687603776163846)	0.917067	1	1	rs34662058	['Signal Transduction', 'Signaling by GPCR', 'Class A/1 (Rhodopsin-like receptors)', 'Amine ligand-binding receptors', 'GPCR downstream signalling', 'Dopamine receptors', 'G alpha (i) signalling events', 'GPCR ligand binding']	7
10	chr11	1249356	1249356	G	A	MUC5B	nonsynonymous SNV	MUC5B:NM_002458:exon31:c.G12476A:p.R4159H	7.783	0.0241313	0.0108359	1.15508	25	7	1011	639	2.25731	0.814175	0.0586486	(-0.029773854771545927, 1.6581236771114463)	0.917067	1	1	rs201712842	['Metabolism of proteins', 'O-linked glycosylation', 'Post-translational protein modification', 'O-linked glycosylation of mucins', 'Termination of O-glycan biosynthesis', 'Disease', 'Innate Immune System', 'Immune System', 'Diseases of glycosylation', 'Diseases associated with O-glycosylation of proteins', 'Defective GALNT3 causes familial hyperphosphatemic tumoral calcinosis (HFTC)', 'Defective…	14
16	chr11	5199902	5199902	G	A	OR51V1	nonsynonymous SNV	OR51V1:NM_001004760:exon1:c.C799T:p.L267F	21.8	0.0164093	0.0309598	-0.915883	17	20	1019	626	0.522179	-0.649746	0.0515722	(-1.3039225207904521, 0.004431337549649306)	0.917067	1	1	rs61736992	['Olfactory Signaling Pathway', 'Sensory Perception']	-
24	chr11	6621604	6621604	C	T	DCHS1				0.00675676	0.0154799	-1.19599	7	10	1029	636	0.432653	-0.837819	0.0907861	(-1.808745961937651, 0.1331077290723317)	0.917067	1	1	rs77307773	-	16
31	chr11	11884503	11884503	G	C	USP47	nonsynonymous SNV	USP47:NM_017944:exon2:c.G76C:p.D26H,USP47:NM_001282659:exon3:c.G280C:p.D94H,USP47:NM_001330208:exon4:c.G340C:p.D114H	27.4	0.0289575	0.0154799	0.903545	30	10	1006	636	1.89662	0.640074	0.0825137	(-0.08245891076432899, 1.3626059134614235)	0.917067	1	1	rs34511735	['Metabolism of proteins', 'Deubiquitination', 'Ub-specific processing proteases', 'Post-translational protein modification']	-
33	chr11	13356310	13356310	T	C	ARNTL				0.0106178	0.0201238	-0.922426	11	13	1025	633	0.522552	-0.649032	0.115871	(-1.4580660289707628, 0.16000292078776435)	0.917067	1	1	rs117692101	['BMAL1:CLOCK,NPAS2 activates circadian gene expression', 'Metabolism', 'PPARA activates gene expression', 'Cellular responses to stress', 'Regulation of lipid metabolism by PPARalpha', 'Circadian Clock', 'Metabolism of lipids', 'Cellular responses to stimuli', 'Heme signaling']	2
36	chr11	17645592	17645592	G	C	OTOG	nonsynonymous SNV	OTOG:NM_001277269:exon54:c.G8526C:p.K2842N,OTOG:NM_001292063:exon55:c.G8490C:p.K2830N	27.2	0.011583	0.0294118	-1.34438	12	19	1024	627	0.386719	-0.950058	0.0106949	(-1.6795654865550822, -0.22054970213486103)	0.917067	1	1	rs61997203	['Sensory processing of sound', 'Sensory processing of sound by outer hair cells of the cochlea', 'Sensory Perception']	-
40	chr11	18933968	18933968	A	G	MRGPRX1	nonsynonymous SNV	MRGPRX1:NM_147199:exon1:c.T817C:p.F273L	24.1	0.0212766	0.0123839	0.780802	22	8	1012	638	1.7337	0.550255	0.185867	(-0.2649815041014536, 1.3654921944531724)	0.917067	1	1	rs138263314	-	-
41	chr11	20363836	20363838	GCG	-	HTATIP2	nonframeshift deletion	HTATIP2:NM_001098520:exon1:c.25_27del:p.A14del		0.0153689	0.0261438	-0.766459	15	16	961	596	0.581426	-0.542272	0.135383	(-1.2540525573784107, 0.16950803129338443)	0.917067	1	1	rs748776887	-	-
49	chr11	45923143	45923145	GCC	-	LARGE2	nonframeshift deletion	LARGE2:NM_001300721:exon2:c.261_263del:p.P92del,LARGE2:NM_152312:exon2:c.261_263del:p.P92del,LARGE2:NM_001300722:exon3:c.168_170del:p.P61del		0.0121704	0.0257235	-1.07971	12	16	974	606	0.466632	-0.762213	0.047943	(-1.5175251061652926, -0.006901673884711523)	0.917067	1	1	rs777467056	['Metabolism of proteins', 'O-linked glycosylation', 'Post-translational protein modification']	-
67	chr11	60523843	60523843	T	C	MS4A13				0.0299228	0.0154799	0.95085	31	10	1005	636	1.96179	0.673858	0.0664767	(-0.04581310187803633, 1.3935288105541292)	0.917067	1	1	rs17544215	-	-
68	chr11	60771518	60771518	T	C	MS4A15				0.0569498	0.0247678	1.20123	59	16	977	630	2.37781	0.866182	0.00249677	(0.30472833451038317, 1.4276354435070862)	0.917067	1	1	rs74350083	-	-
69	chr11	60852694	60852696	GCG	-	PTGDR2	nonframeshift deletion	PTGDR2:NM_004778:exon2:c.1027_1029del:p.R343del		0.0262136	0.0109375	1.26103	27	7	1003	633	2.43427	0.889646	0.0372813	(0.05241597161499789, 1.7268767306475132)	0.917067	1	1	rs781273196	['Signal Transduction', 'Signaling by GPCR', 'Class A/1 (Rhodopsin-like receptors)', 'GPCR downstream signalling', 'Eicosanoid ligand-binding receptors', 'Prostanoid ligand receptors', 'G alpha (i) signalling events', 'GPCR ligand binding']	7
75	chr11	62870857	62870857	-	AA	SLC3A2				0.0342612	0.0177994	0.944753	32	11	902	607	1.95767	0.671755	0.0573473	(-0.020961879912005155, 1.3644716819084657)	0.917067	1	1	rs200255100	['Hemostasis', 'Metabolism', 'Cell surface interactions at the vascular wall', 'Basigin interactions', 'Amino acid transport across the plasma membrane', 'Transport of small molecules', 'Transport of inorganic cations/anions and amino acids/oligopeptides', 'SLC-mediated transmembrane transport', 'Tryptophan catabolism', 'Metabolism of amino acids and derivatives', 'Disease', 'SLC transporter diso…	28
80	chr11	65590166	65590166	G	A	EHBP1L1	nonsynonymous SNV	EHBP1L1:NM_001351087:exon14:c.G1865A:p.R622Q,EHBP1L1:NM_001099409:exon15:c.G4139A:p.R1380Q	33	0.00482625	0.0139319	-1.52941	5	9	1031	637	0.343248	-1.0693	0.0562219	(-2.1669703978131998, 0.028367411119366803)	0.917067	1	1	rs199963590	-	-
96	chr11	74273613	74273613	A	-	P4HA3				0.0250965	0.0154799	0.697094	26	10	1010	636	1.63723	0.493004	0.189244	(-0.24302396533505466, 1.2290327623995623)	0.917067	1	1	rs754656597	['Extracellular matrix organization', 'Collagen formation', 'Collagen biosynthesis and modifying enzymes']	-
100	chr11	78200699	78200699	C	T	USP35	nonsynonymous SNV	USP35:NM_020798:exon6:c.C1088T:p.S363L	23.7	0.0144788	0.00309598	2.22547	15	2	1021	644	4.73066	1.55406	0.0394123	(0.07536378624433326, 3.0327640707195744)	0.917067	1	1	rs147270370	-	-
106	chr11	85734691	85734691	T	C	SYTL2	nonsynonymous SNV	SYTL2:NM_001162951:exon6:c.A635G:p.Q212R,SYTL2:NM_001162953:exon6:c.A638G:p.Q213R,SYTL2:NM_001289608:exon6:c.A491G:p.Q164R,SYTL2:NM_001365827:exon6:c.A491G:p.Q164R,SYTL2:NM_001365826:exon7:c.A638G:p.Q213R,SYTL2:NM_032943:exon7:c.A635G:p.Q212R,SYTL2:NM_206927:exon7:c.A638G:p.Q213R,SYTL2:NM_206928:exon7:c.A635G:p.Q212R	0.018	0.0337838	0.0139319	1.27794	35	9	1001	637	2.47475	0.906138	0.0162827	(0.16691383906418555, 1.645362881756087)	0.917067	1	1	rs35751209	-	-
110	chr11	88114041	88114041	G	T	RAB38	nonsynonymous SNV	RAB38:NM_022337:exon3:c.C583A:p.P195T	19.64	0.0212355	0.00928793	1.19305	22	6	1014	640	2.31427	0.839093	0.0701369	(-0.0690070190940858, 1.747192971759786)	0.917067	1	1	rs116071834	['Membrane Trafficking', 'Vesicle-mediated transport', 'RAB GEFs exchange GTP for GDP on RABs', 'Rab regulation of trafficking', 'Metabolism of proteins', 'Post-translational protein modification', 'RAB geranylgeranylation']	11
114	chr11	89862712	89862712	C	G	TRIM51EP				0.0415058	0.0185759	1.15988	43	12	993	634	2.28785	0.827612	0.0122531	(0.18001200186633481, 1.475211510728895)	0.917067	1	1	rs201666728	-	-
115	chr11	89874985	89874985	G	C	TRIM64B	nonsynonymous SNV	TRIM64B:NM_001164397:exon2:c.C497G:p.S166W	19.88	0.0405405	0.0154799	1.38897	42	10	994	636	2.68732	0.988546	0.00542526	(0.291757633207709, 1.685334130738032)	0.917067	1	1	rs117000701	-	-
120	chr11	90218199	90218199	-	A	CHORDC1				0.0328185	0.0247678	0.406045	34	16	1002	630	1.33608	0.289738	0.34592	(-0.31276195380546323, 0.8922386340397611)	0.917067	1	1	rs537476588	-	-
123	chr11	101583513	101583513	G	T	TRPC6				0.0222868	0.0108696	1.0359	23	7	1009	637	2.07433	0.729639	0.0931932	(-0.12220489970713999, 1.5814823038919217)	0.917067	1	1	rs191383391	['Hemostasis', 'Effects of PIP2 hydrolysis', 'Elevation of cytosolic Ca2+ levels', 'Signal Transduction', 'Stimuli-sensing channels', 'TRP channels', 'Signaling by GPCR', 'Transport of small molecules', 'GPCR downstream signalling', 'G alpha (q) signalling events', 'Platelet homeostasis', 'Platelet calcium homeostasis', 'Platelet activation, signaling and aggregation', 'Ion channel transport', 'D…	1
132	chr11	108393341	108393341	G	A	C11orf65	nonsynonymous SNV	C11orf65:NM_001330368:exon5:c.C451T:p.H151Y,C11orf65:NM_001351110:exon6:c.C505T:p.H169Y,C11orf65:NM_152587:exon7:c.C598T:p.H200Y	0.001	0.00675676	0.0154799	-1.19599	7	10	1029	636	0.432653	-0.837819	0.0907861	(-1.808745961937651, 0.1331077290723317)	0.917067	1	1	rs137901968	-	-
134	chr11	111737492	111737492	T	A	PPP2R1B	nonsynonymous SNV	PPP2R1B:NM_181700:exon13:c.A1675T:p.N559Y,PPP2R1B:NM_181699:exon15:c.A1867T:p.N623Y	22.1	0.0106178	0.0216718	-1.02934	11	14	1025	632	0.48446	-0.724721	0.0743094	(-1.5206096591112228, 0.07116855062614469)	0.917067	1	1	rs61756429	['Hemostasis', 'Opioid Signalling', 'Inhibition of replication initiation of damaged DNA by RB1/E2F1', 'E2F mediated regulation of DNA replication', 'PIP3 activates AKT signaling', 'Cytokine Signaling in Immune system', 'Adaptive Immune System', 'Amplification of signal from the kinetochores', 'Amplification of signal from unattached kinetochores via a MAD2 inhibitory signal', 'Signal Transductio…	8
140	chr11	117822543	117822543	G	A	FXYD2;FXYD6-FXYD2				0.00965251	0.0201238	-1.05993	10	13	1026	633	0.474584	-0.745317	0.0785293	(-1.5756514281359637, 0.08501769202790388)	0.917067	1	1	rs118137703	-	-
142	chr11	118644635	118644635	C	-	PHLDB1				0.0164093	0.00464396	1.82108	17	3	1019	643	3.57573	1.27417	0.0425464	(0.04282860391853882, 2.5055088888874617)	0.917067	1	1	rs201097422	-	-
147	chr11	121307038	121307038	G	T	SC5D				0.00965251	0.0201238	-1.05993	10	13	1026	633	0.474584	-0.745317	0.0785293	(-1.5756514281359637, 0.08501769202790388)	0.917067	1	1	rs187256298	['Metabolism', 'Cholesterol biosynthesis', 'Metabolism of lipids', 'Cholesterol biosynthesis via desmosterol', 'Cholesterol biosynthesis via lathosterol', 'Metabolism of steroids', 'Regulation of cholesterol biosynthesis by SREBP (SREBF)', 'Activation of gene expression by SREBF (SREBP)']	-
152	chr11	124613081	124613081	G	C	PANX3	nonsynonymous SNV	PANX3:NM_052959:exon2:c.G283C:p.G95R	2.573	0.00579151	0.0154799	-1.41838	6	10	1030	636	0.370485	-0.992941	0.0556562	(-2.0098770393907155, 0.02399475609161561)	0.917067	1	1	rs34498516	-	-
153	chr11	124649582	124649582	G	A	SIAE				0.0202703	0.00773994	1.38897	21	5	1015	641	2.65241	0.97547	0.0511405	(-0.00483393283116984, 1.9557741142993792)	0.917067	1	1	rs79300393	-	-
154	chr11	124752638	124752638	C	T	VSIG2;ESAM			8.411	0.00868726	0.0185759	-1.09646	9	12	1027	634	0.462999	-0.77003	0.0827548	(-1.6399440453840424, 0.09988338949781572)	0.917067	1	1	rs61910626	-	-
159	chr11	134318957	134318957	-	TT	GLB1L3				0.0376448	0.0154799	1.28206	39	10	997	636	2.48786	0.911424	0.0109166	(0.20961392078883267, 1.6132347722389362)	0.917067	1	1	rs5795879	-	-
2	chr13	21155151	21155151	-	AGTTTTCTTTGTTGCTGACATCTCGGATGTTCTGTCCATGTTTAAGGAACCTTTTACTGGGTGGCACTGCTTTAATTGCTATTGGAGTAGCTAGGTTTGAGT	SKA3				0.019305	0.00928793	1.05555	20	6	1016	640	2.09974	0.741812	0.113106	(-0.1758473450758099, 1.6594720501582625)	0.917067	1	1		-	-
14	chr13	32395963	32395963	-	C	BRCA2				0.0197095	0.04375	-1.15039	19	28	945	612	0.439456	-0.822218	0.00642904	(-1.4135885593907371, -0.23084779258962396)	0.917067	1	1	rs66657277	['HDR through Homologous Recombination (HRR)', 'DNA Double-Strand Break Repair', 'Resolution of D-Loop Structures', 'Homology Directed Repair', 'HDR through Homologous Recombination (HRR) or Single Strand Annealing (SSA)', 'Resolution of D-loop Structures through Holliday Junction Intermediates', 'Homologous DNA Pairing and Strand Exchange', 'Presynaptic phase of homologous DNA pairing and strand…	0
17	chr13	38358069	38358069	A	T	UFM1				0.0117188	0.0185759	-0.66461	12	12	1012	634	0.626482	-0.467635	0.255642	(-1.2739215243588118, 0.33865173353844)	0.917067	1	1	rs201311871	-	-
18	chr13	39029248	39029251	AAAA	-	PROSER1				0.0328185	0.0154799	1.08412	34	10	1002	636	2.15808	0.769221	0.0342298	(0.05717873010189545, 1.4812626965329607)	0.917067	1	1		-	-
20	chr13	40808421	40808421	-	T	TPTE2P5				0.0289575	0.0139319	1.05555	30	9	1006	637	2.11067	0.747005	0.0513808	(-0.0044777450876584135, 1.4984879635644863)	0.917067	1	1	rs150927352	-	-
28	chr13	51758193	51758193	C	T	WDFY2	nonsynonymous SNV	WDFY2:NM_052950:exon11:c.C1066T:p.R356C	35	0.015444	0.00773994	0.996654	16	5	1020	641	2.01098	0.698622	0.174775	(-0.31040786308733126, 1.7076525839834)	0.917067	1	1	rs35409673	-	-
33	chr13	95301263	95301263	G	T	ABCC4	nonsynonymous SNV	ABCC4:NM_001105515:exon1:c.C52A:p.L18I,ABCC4:NM_001301829:exon1:c.C52A:p.L18I,ABCC4:NM_001301830:exon1:c.C52A:p.L18I,ABCC4:NM_005845:exon1:c.C52A:p.L18I	12.46	0.015444	0.0340557	-1.14085	16	22	1020	624	0.44492	-0.809861	0.0148556	(-1.4614940344533425, -0.15822850360150398)	0.917067	1	1	rs11568681	['Hemostasis', 'Platelet degranulation ', 'Transport of small molecules', 'ABC-family proteins mediated transport', 'Platelet activation, signaling and aggregation', 'Response to elevated platelet cytosolic Ca2+']	-
2	chrX	2266856	2266856	G	T	DHRSX	nonsynonymous SNV	DHRSX:NM_145177:exon5:c.C480A:p.N160K	24	0.019305	0.0371517	-0.944452	20	24	1016	622	0.510171	-0.67301	0.0283721	(-1.2747497929342255, -0.07127039145218039)	0.917067	1	1	rs143245543	-	-
7	chrX	3310925	3310925	C	G	MXRA5	nonsynonymous SNV	MXRA5:NM_015419:exon7:c.G7278C:p.E2426D	20.3	0.0212355	0.00928793	1.19305	22	6	1014	640	2.31427	0.839093	0.0701369	(-0.0690070190940858, 1.747192971759786)	0.917067	1	1	rs148675322	-	-
14	chrX	7843768	7843770	AGT	0	VCX				0.0303327	0.0125392	1.27443	31	8	991	630	2.46342	0.901551	0.0241394	(0.11792203142244184, 1.6851798642993587)	0.917067	1	1		-	-
17	chrX	8465499	8465499	G	A	VCX3B	nonsynonymous SNV	VCX3B:NM_001001888:exon2:c.G49A:p.A17T	0.001	0.0622568	0.0309598	1.00784	64	20	964	626	2.07801	0.73141	0.0051184	(0.2193384395369088, 1.2434813330535581)	0.917067	1	1	rs199909395	-	-
18	chrX	8466147	8466147	G	C	VCX3B	nonsynonymous SNV	VCX3B:NM_001001888:exon3:c.G505C:p.E169Q	0.003	0.00595238	0.0159236	-1.41962	6	10	1002	618	0.37006	-0.99409	0.0554066	(-2.0111640750196464, 0.022983179113426067)	0.917067	1	1	rs200991738	-	-
33	chrX	20176362	20176362	A	-	RPS6KA3				0.042471	0.0232198	0.871123	44	15	992	631	1.86586	0.623722	0.0397345	(0.02927835919168198, 1.2181660169531008)	0.917067	1	1	rs748680802	['Neurotransmitter receptors and postsynaptic signal transmission', 'Transmission across Chemical Synapses', 'Neuronal System', 'Developmental Biology', 'Cytokine Signaling in Immune system', 'Signal Transduction', 'Toll Like Receptor 4 (TLR4) Cascade', 'MyD88:MAL(TIRAP) cascade initiated on plasma membrane', 'MyD88-independent TLR4 cascade ', 'Signaling by NTRKs', 'Toll Like Receptor 9 (TLR9) Ca…	2
55	chrX	45058976	45058976	-	T	KDM6A				0.0341131	0.0139319	1.29193	35	9	991	637	2.49972	0.916179	0.0151384	(0.176927891703622, 1.6554293190871148)	0.917067	1	1	rs372323256	['HDMs demethylate histones', 'Chromatin modifying enzymes', 'Chromatin organization', 'Developmental Biology', 'Activation of anterior HOX genes in hindbrain development during early embryogenesis', 'Activation of HOX genes during differentiation']	0
56	chrX	47203748	47203750	TTT	-	UBA1				0.0188119	0.00776398	1.27678	19	5	991	639	2.45025	0.896191	0.0760619	(-0.09394123969958679, 1.886323213259359)	0.917067	1	1		['Adaptive Immune System', 'Immune System', 'Metabolism of proteins', 'Post-translational protein modification', 'Protein ubiquitination', 'Synthesis of active ubiquitin: roles of E1 and E2 enzymes', 'Antigen processing: Ubiquitination & Proteasome degradation', 'Class I MHC mediated antigen processing & presentation']	3
60	chrX	47915116	47915116	A	G	ZNF81	nonsynonymous SNV	ZNF81:NM_007137:exon5:c.A470G:p.N157S	0.001	0.011583	0.0154799	-0.418384	12	10	1024	636	0.745313	-0.293952	0.495365	(-1.138971747169511, 0.5510683762387594)	0.917067	1	1	rs41312157	-	-
78	chrX	53940132	53940132	C	A	PHF8				0.0337838	0.0201238	0.747425	35	13	1001	633	1.70253	0.532114	0.105528	(-0.11221404394329326, 1.1764427376569575)	0.917067	1	1	rs145977200	['Cell Cycle', 'Condensation of Prophase Chromosomes', 'HDMs demethylate histones', 'Chromatin modifying enzymes', 'Chromatin organization', 'Mitotic Prophase', 'M Phase', 'Cell Cycle, Mitotic']	25
98	chrX	71536963	71536967	TTTTT	-	OGT				0.0154321	0.00623053	1.30851	15	4	957	638	2.5	0.916291	0.104886	(-0.19118257198928768, 2.0237640357375977)	0.917067	1	1		['RIPK1-mediated regulated necrosis', 'Regulated Necrosis', 'Programmed Cell Death', 'Regulation of necroptotic cell death', 'HATs acetylate histones', 'Chromatin modifying enzymes', 'Metabolism of proteins', 'Chromatin organization', 'Deubiquitination', 'UCH proteinases', 'Post-translational protein modification']	3
100	chrX	72593341	72593341	-	TT	PHKA1				0.0666023	0.0371517	0.842144	69	24	967	622	1.84928	0.614794	0.0112338	(0.13952315699002665, 1.0900653860803715)	0.917067	1	1	rs35500546	['Metabolism', 'Glycogen breakdown (glycogenolysis)', 'Metabolism of carbohydrates', 'Glycogen metabolism']	-
102	chrX	72874942	72874942	G	A	DMRTC1;DMRTC1B	nonsynonymous SNV	DMRTC1:NM_033053:exon3:c.C140T:p.A47V,DMRTC1B:NM_001080851:exon4:c.C140T:p.A47V	12.95	0.0247748	0.0517241	-1.06197	22	30	866	550	0.465743	-0.764122	0.00753268	(-1.324550614993531, -0.20369250228598557)	0.917067	1	1	rs200698413	-	-
114	chrX	85981821	85981822	AA	-	CHM				0.0241779	0.0108359	1.15787	25	7	1009	639	2.26179	0.816155	0.0580385	(-0.02779811817725697, 1.6601083378508834)	0.917067	1	1	rs796166934	['Membrane Trafficking', 'Vesicle-mediated transport', 'RAB GEFs exchange GTP for GDP on RABs', 'Rab regulation of trafficking', 'Generic Transcription Pathway', 'Transcriptional Regulation by TP53', 'Metabolism of proteins', 'TP53 Regulates Transcription of Cell Death Genes', 'Post-translational protein modification', 'TP53 regulates transcription of several additional cell death genes whose spe…	11
116	chrX	100664736	100664736	G	A	SRPX2				0.970077	0.987616	-0.0258508	1005	638	31	8	0.406512	-0.900141	0.0243465	(-1.683686798528825, -0.11659545278502392)	0.917067	1	1	rs2022475	-	-
125	chrX	108269160	108269160	-	A	COL4A6				0.0125483	0.00464396	1.43406	13	3	1023	643	2.72369	1.00199	0.118867	(-0.2572637313600705, 2.2612377855189107)	0.917067	1	1	rs748543562	['Collagen degradation', 'Degradation of the extracellular matrix', 'Extracellular matrix organization', 'Collagen formation', 'Collagen biosynthesis and modifying enzymes', 'Assembly of collagen fibrils and other multimeric structures', 'Crosslinking of collagen fibrils', 'Laminin interactions', 'Non-integrin membrane-ECM interactions', 'Integrin cell surface interactions', 'Anchoring fibril for…	6
130	chrX	111172955	111172958	TCTC	-	PAK3				0.0202703	0.00928793	1.12594	21	6	1015	640	2.2069	0.791587	0.0891407	(-0.12107737023846987, 1.7042518769848662)	0.917067	1	1	rs924408093	['Developmental Biology', 'Signal Transduction', 'Signaling by Rho GTPases', 'EPH-Ephrin signaling', 'Semaphorin interactions', 'Ephrin signaling', 'Sema3A PAK dependent Axon repulsion', 'Axon guidance', 'MAPK family signaling cascades', 'MAPK6/MAPK4 signaling', 'RHO GTPase cycle', 'RHOU GTPase cycle', 'Nervous system development', 'Signaling by Rho GTPases, Miro GTPases and RHOBTB3', 'Adaptive I…	9
139	chrX	129913379	129913379	-	A	UTP14A				0.0318533	0.0139319	1.19305	33	9	1003	637	2.32868	0.845302	0.0258997	(0.10159685819842568, 1.5890068452825494)	0.917067	1	1	rs758765844	['Major pathway of rRNA processing in the nucleolus and cytosol', 'rRNA processing', 'rRNA processing in the nucleus and cytosol', 'Metabolism of RNA', 'rRNA modification in the nucleus and cytosol']	19
143	chrX	135123439	135123439	T	C	SMIM10L2B-AS1				0.0853175	0.0457413	0.899343	86	29	922	605	1.94592	0.665735	0.00259401	(0.23255092561064905, 1.098918475871913)	0.917067	1	1	rs1133828	-	-
151	chrX	141906056	141906161	CCTGAGAGAACTCAGAGTACTTTTGAGGGTTTTGCCCAGTCTCCTCTCCAGATTCCTGTGAGCCCCTCCTCCTCCTCCACTTTACTGAGTCTTTTCCAGAGTTTCT	0	MAGEC1				0.0302144	0.0123839	1.28677	31	8	995	638	2.48467	0.910141	0.0228126	(0.1265710225851625, 1.6937113953978535)	0.917067	1	1		-	-
153	chrX	141906098	141906203	CCTCTCCAGATTCCTGTGAGCCCCTCCTCCTCCTCCACTTTACTGAGTCTTTTCCAGAGTTTCTCTGAGAGAACTCAGAGTACTTTTGAGGGTTTTGCCCAGTCTT	0	MAGEC1				0.0291667	0.01	1.54432	28	6	932	594	2.97425	1.08999	0.0161026	(0.20228273413920772, 1.9777003571091993)	0.917067	1	1		-	-
175	chrX	153941932	153941932	G	C	RENBP				0.0310174	0.0131579	1.23715	25	7	781	525	2.40077	0.875789	0.0423102	(0.030404917159912004, 1.7211726599697372)	0.917067	1	1		['Metabolism of proteins', 'Biosynthesis of the N-glycan precursor (dolichol lipid-linked oligosaccharide, LLO) and transfer to a nascent protein', 'Asparagine N-linked glycosylation', 'Synthesis of UDP-N-acetyl-glucosamine', 'Synthesis of substrates in N-glycan biosythesis', 'Post-translational protein modification']	-
177	chrX	154532147	154532147	T	A	G6PD				0.0135135	0.00309598	2.12594	14	2	1022	644	4.41096	1.48409	0.0501204	(-0.0007793008943790536, 2.9689635096864144)	0.917067	1	1		['Metabolism', 'Generic Transcription Pathway', 'Transcriptional Regulation by TP53', 'TP53 Regulates Metabolic Genes', 'Pentose phosphate pathway', 'Metabolism of carbohydrates', 'RNA Polymerase II Transcription', 'Gene expression (Transcription)']	-
0	chr15	20534647	20534647	C	T	GOLGA6L6	nonsynonymous SNV	GOLGA6L6:NM_001145004:exon8:c.G1787A:p.R596Q		0.0442105	0.0234899	0.912347	42	14	908	582	1.92291	0.653838	0.0367982	(0.04009219915595974, 1.2675845164405493)	0.917067	1	1	rs57050697	-	-
3	chr15	20535676	20535676	G	A	GOLGA6L6	nonsynonymous SNV	GOLGA6L6:NM_001145004:exon8:c.C758T:p.A253V	0.114	0.0267857	0.0108696	1.30117	15	4	545	364	2.50459	0.918124	0.10526	(-0.19276040436977104, 2.029008230281403)	0.917067	1	1		-	-
11	chr15	22465397	22465397	G	A	GOLGA8EP;HERC2P7				0.0139186	0.00491803	1.50086	13	3	921	607	2.85595	1.04941	0.102479	(-0.21015071293178011, 2.3089623601270173)	0.917067	1	1		-	-
19	chr15	23364983	23364983	C	T	GOLGA8H;GOLGA8S	nonsynonymous SNV	GOLGA8S:NM_001355465:exon18:c.C1088T:p.S363F	22.6	0.0203883	0.00776398	1.39288	21	5	1009	639	2.65986	0.978274	0.0504813	(-0.0020511099203914807, 1.9585990285468886)	0.917067	1	1	rs576988645	-	-
21	chr15	25062415	25062415	A	G	SNORD116-5;SNORD116-7				0.96139	0.979876	-0.0274777	996	633	40	13	0.511374	-0.670653	0.0380275	(-1.3042610614871553, -0.03704546093679906)	0.917067	1	1	rs7402542	-	-
24	chr15	25175008	25175008	T	C	SNORD115-3				0.00965251	0.0232198	-1.26638	10	15	1026	631	0.410006	-0.891582	0.0302087	(-1.697854644047076, -0.08530989854825632)	0.917067	1	1	rs764035852	-	-
28	chr15	30113887	30113887	T	0	ULK4P1;ULK4P2;ULK4P3				0.0754717	0.0377698	0.998703	64	21	784	535	2.07969	0.732218	0.00448596	(0.22721389559965377, 1.2372228487640404)	0.917067	1	1		-	-
38	chr15	32452567	32452567	G	A	GOLGA8O	nonsynonymous SNV	GOLGA8O:NM_001277308:exon4:c.C233T:p.P78L	11.78	0.048583	0.022508	1.11001	48	14	940	608	2.21763	0.796439	0.00975514	(0.19243110937394048, 1.40044626661556)	0.917067	1	1	rs199631107	-	-
42	chr15	34381982	34381982	T	C	GOLGA8A	nonsynonymous SNV	GOLGA8A:NM_181077:exon14:c.A1439G:p.Q480R,GOLGA8A:NM_001368072:exon22:c.A1436G:p.Q479R,GOLGA8A:NM_001368071:exon23:c.A1436G:p.Q479R	0.087	0.148936	0.294872	-0.985394	28	46	160	110	0.418478	-0.87113	0.00124333	(-1.399936919289951, -0.3423237522206517)	0.917067	1	1	rs138808613	-	-
47	chr15	40367842	40367842	G	T	DISP2	nonsynonymous SNV	DISP2:NM_033510:exon8:c.G1730T:p.G577V	22.4	0.0183398	0.00928793	0.981547	19	6	1017	640	1.99279	0.689535	0.143202	(-0.23361405034488536, 1.6126846308319718)	0.917067	1	1	rs76331864	['Signal Transduction', 'Hedgehog ligand biogenesis', 'Signaling by Hedgehog', 'Release of Hh-Np from the secreting cell']	-
48	chr15	40701777	40701782	TTTTTT	-	RAD51				0.0133745	0.025	-0.902445	13	16	959	624	0.528676	-0.63738	0.0908322	(-1.3761289358348168, 0.10136879325030745)	0.917067	1	1		['HDR through Single Strand Annealing (SSA)', 'HDR through Homologous Recombination (HRR)', 'DNA Double-Strand Break Repair', 'Resolution of D-Loop Structures', 'Homology Directed Repair', 'HDR through Homologous Recombination (HRR) or Single Strand Annealing (SSA)', 'Resolution of D-loop Structures through Holliday Junction Intermediates', 'Homologous DNA Pairing and Strand Exchange', 'Presynapt…	0
51	chr15	41493492	41493492	G	A	ITPKA			7.368	0.0260618	0.0123839	1.07347	27	8	1009	638	2.13404	0.758019	0.0617057	(-0.03714610921538719, 1.5531832838467374)	0.917067	1	1	rs41277684	['Metabolism', 'Inositol phosphate metabolism', 'Synthesis of IP3 and IP4 in the cytosol']	12
78	chr15	52317044	52317044	C	T	MYO5A				0.00772201	0.0154799	-1.00335	8	10	1028	636	0.494942	-0.703315	0.140373	(-1.6382513098090605, 0.23162044183066577)	0.917067	1	1	rs72734962	['Innate Immune System', 'Immune System', 'Fcgamma receptor (FCGR) dependent phagocytosis', 'Regulation of actin dynamics for phagocytic cup formation', 'Translocation of SLC2A4 (GLUT4) to the plasma membrane', 'Disease', 'Membrane Trafficking', 'Insulin processing', 'Peptide hormone metabolism', 'Metabolism of proteins', 'Vesicle-mediated transport', 'Infectious disease', 'Leishmania infection',…	-
83	chr15	58431510	58431510	C	T	LIPC				0.0106178	0.0216718	-1.02934	11	14	1025	632	0.48446	-0.724721	0.0743094	(-1.5206096591112228, 0.07116855062614469)	0.917067	1	1	rs35511894	['Plasma lipoprotein assembly, remodeling, and clearance', 'Transport of small molecules', 'Assembly of active LPL and LIPC lipase complexes', 'Plasma lipoprotein remodeling', 'Chylomicron clearance', 'Plasma lipoprotein clearance']	5
87	chr15	59689292	59689292	T	G	BNIP2			8.106	0.0250965	0.0123839	1.01902	26	8	1010	638	2.05297	0.719288	0.0775098	(-0.07930815324869844, 1.5178834929509621)	0.917067	1	1	rs2306359	['Developmental Biology', 'Myogenesis']	1
96	chr15	69436710	69436710	T	C	KIF23	nonsynonymous SNV	KIF23:NM_001281301:exon13:c.T1213C:p.F405L,KIF23:NM_001367804:exon14:c.T1543C:p.F515L,KIF23:NM_004856:exon14:c.T1543C:p.F515L,KIF23:NM_138555:exon14:c.T1543C:p.F515L,KIF23:NM_001367805:exon15:c.T1585C:p.F529L	14.03	0.0212355	0.0123839	0.778014	22	8	1014	638	1.73028	0.548281	0.187448	(-0.26695124647647406, 1.3635132682207574)	0.917067	1	1	rs17310879	['Hemostasis', 'Cell Cycle', 'Membrane Trafficking', 'Vesicle-mediated transport', 'COPI-dependent Golgi-to-ER retrograde traffic', 'Intra-Golgi and retrograde Golgi-to-ER traffic', 'Mitotic Telophase/Cytokinesis', 'M Phase', 'Cell Cycle, Mitotic', 'Golgi-to-ER retrograde transport', 'Kinesins', 'Factors involved in megakaryocyte development and platelet production', 'Adaptive Immune System', 'Im…	4
101	chr15	74072298	74072298	G	C	GOLGA6A	nonsynonymous SNV	GOLGA6A:NM_001038640:exon14:c.C1513G:p.Q505E	0.001	0.0164093	0.00619195	1.40604	17	4	1019	642	2.67763	0.98493	0.0775449	(-0.10872704384579412, 2.0785875506529172)	0.917067	1	1	rs200350318	-	-
111	chr15	76295787	76295788	TT	-	ETFA				0.03861	0.0185759	1.05555	40	12	996	634	2.12182	0.752275	0.0238945	(0.09953105342279545, 1.4050179489343315)	0.917067	1	1	rs796500419	['The citric acid (TCA) cycle and respiratory electron transport', 'Metabolism', 'Respiratory electron transport, ATP synthesis by chemiosmotic coupling, and heat production by uncoupling proteins.', 'Respiratory electron transport']	-
114	chr15	80948906	80948908	GAA	-	CEMIP	nonframeshift deletion	CEMIP:NM_018689:exon29:c.4068_4070del:p.K1360del,CEMIP:NM_001293298:exon30:c.4068_4070del:p.K1360del,CEMIP:NM_001293304:exon30:c.4068_4070del:p.K1360del		0.00772201	0.0185759	-1.26638	8	12	1028	634	0.411154	-0.888787	0.0529382	(-1.7888420601649737, 0.011268860792876811)	0.917067	1	1	rs200201338	['Metabolism', 'Glycosaminoglycan metabolism', 'Hyaluronan metabolism', 'Hyaluronan biosynthesis and export', 'Metabolism of carbohydrates']	-
118	chr15	82344992	82344997	CCTCCT	0	GOLGA6L10				0.0170683	0.0345912	-1.01909	17	22	979	614	0.484632	-0.724366	0.0267467	(-1.3652716186109248, -0.08346002876001113)	0.917067	1	1		-	-
120	chr15	82345108	82345234	CACAGCCTCTCCTCCTGTTCACGTAGCCTCTCCTCCTGTTCACACAGCCTCTCCTCCTGTTCACGTAGCCTCTCCTCCTGTTCACACAGCCTCTCCTCCTGTTCATGTAGCCTCTCCTCCTGTTCAT	0	GOLGA6L10				0.00584795	0.0124224	-1.08694	6	8	1020	636	0.467647	-0.760041	0.161153	(-1.8231649524542846, 0.3030821216743327)	0.917067	1	1		-	-
121	chr15	82345109	82345130	ACAGCCTCTCCTCCTGTTCACG	0	GOLGA6L10				0.00487329	0.0139752	-1.5199	5	9	1021	635	0.345522	-1.0627	0.0577646	(-2.1603936632915794, 0.03499469494339502)	0.917067	1	1		-	-
147	chr15	99799825	99799916	TGAGAAGATGAACTCCTTGGTCTGCCTGCTCCGCCGACTCCTGCAGGAGTGTCTTCTTGTCCCTACGCGAGTGCAGGTTGGACAGCAGCTCC	0	DNM1P46				0.0338491	0.0170807	0.986748	35	11	999	633	2.01611	0.701168	0.0447566	(0.016410478666350925, 1.3859263857069783)	0.917067	1	1		-	-
148	chr15	99800103	99800103	G	C	DNM1P46				0.0532946	0.0263158	1.01806	55	17	977	629	2.08291	0.733764	0.00931006	(0.1807255576657666, 1.2868033340020606)	0.917067	1	1	rs4965538	-	-
156	chr15	101977318	101977318	C	G	DDX11L9				0.0176322	0.0349265	-0.986105	14	19	780	525	0.495951	-0.701277	0.0493077	(-1.400429629520465, -0.0021249837659258475)	0.917067	1	1	rs796312422	-	-
6	chr10	17162250	17162263	AAAAAAAAAAAAAC	0	TRDMT1				0.0203095	0.0340557	-0.745744	21	22	1013	624	0.587992	-0.531041	0.0859899	(-1.137247980760538, 0.07516567773224103)	0.917067	1	1		['tRNA modification in the nucleus and cytosol', 'tRNA processing', 'Metabolism of RNA']	-
7	chr10	17798560	17798560	C	T	TMEM236				0.00579151	0.0139319	-1.26638	6	9	1030	637	0.412298	-0.88601	0.0942389	(-1.9237147008987123, 0.151695633379346)	0.917067	1	1	rs994727295	-	-
12	chr10	18539557	18539557	C	G	CACNB2	nonsynonymous SNV	CACNB2:NM_000724:exon13:c.C1651G:p.R551G,CACNB2:NM_001330060:exon13:c.C1537G:p.R513G,CACNB2:NM_201570:exon13:c.C1672G:p.R558G,CACNB2:NM_201590:exon13:c.C1654G:p.R552G,CACNB2:NM_001167945:exon14:c.C1618G:p.R540G,CACNB2:NM_201571:exon14:c.C1732G:p.R578G,CACNB2:NM_201572:exon14:c.C1660G:p.R554G,CACNB2:NM_201593:exon14:c.C1702G:p.R568G,CACNB2:NM_201596:exon14:c.C1816G:p.R606G,CACNB2:NM_201597:exon14:…	24.4	0.019305	0.00619195	1.64051	20	4	1016	642	3.15945	1.1504	0.0364844	(0.07234277011595558, 2.228452405855312)	0.917067	1	1	rs61733968	['Presynaptic depolarization and calcium channel opening', 'Transmission across Chemical Synapses', 'Neuronal System', 'Metabolism', 'Integration of energy metabolism', 'Muscle contraction', 'Regulation of insulin secretion', 'Cardiac conduction', 'Phase 0 - rapid depolarisation', 'Phase 2 - plateau phase', 'Developmental Biology', 'NCAM signaling for neurite out-growth', 'Adrenaline,noradrenalin…	8
13	chr10	18539740	18539740	-	T	CACNB2				0.0213178	0.00928793	1.19863	22	6	1010	640	2.32343	0.843046	0.0688291	(-0.06506270575121087, 1.7511538070485595)	0.917067	1	1	rs753335762	['Presynaptic depolarization and calcium channel opening', 'Transmission across Chemical Synapses', 'Neuronal System', 'Metabolism', 'Integration of energy metabolism', 'Muscle contraction', 'Regulation of insulin secretion', 'Cardiac conduction', 'Phase 0 - rapid depolarisation', 'Phase 2 - plateau phase', 'Developmental Biology', 'NCAM signaling for neurite out-growth', 'Adrenaline,noradrenalin…	8
18	chr10	27060339	27060339	A	G	ANKRD26				0.011583	0.0247678	-1.09646	12	16	1024	630	0.461426	-0.773434	0.0446695	(-1.528458378140058, -0.018409739191251773)	0.917067	1	1	rs149655759	['Signal Transduction', 'Signaling by Rho GTPases', 'RHO GTPase cycle', 'RND3 GTPase cycle', 'RND2 GTPase cycle', 'RND1 GTPase cycle', 'Signaling by Rho GTPases, Miro GTPases and RHOBTB3']	-
19	chr10	30349281	30349281	A	T	MTPAP				0.0280464	0.0634675	-1.1782	29	41	1005	605	0.425798	-0.853791	0.000576938	(-1.3399285226549567, -0.36765267570537985)	0.917067	1	1	rs759994246	-	-
20	chr10	30349282	30349282	A	T	MTPAP				0.00968992	0.0216718	-1.16126	10	14	1022	632	0.441711	-0.8171	0.0501237	(-1.6346403286952396, 0.0004411022192303271)	0.917067	1	1		-	-
21	chr10	37197321	37197321	T	C	ANKRD30A				0.00868726	0.0154799	-0.833421	9	10	1027	636	0.557352	-0.584559	0.205997	(-1.490514534077028, 0.32139620958450343)	0.917067	1	1	rs1201828	-	-
24	chr10	43100751	43100751	G	C	RET				0.00868726	0.0216718	-1.31885	9	14	1027	632	0.395604	-0.927341	0.0311254	(-1.770570902832247, -0.08411023328923195)	0.917067	1	1		['Developmental Biology', 'Signal Transduction', 'Axon guidance', 'RAF/MAP kinase cascade', 'MAPK family signaling cascades', 'MAPK1/MAPK3 signaling', 'RET signaling', 'Nervous system development']	1
32	chr10	47502281	47502281	G	-	AGAP9	frameshift deletion	AGAP9:NM_001190810:exon8:c.1848delC:p.N616Kfs*28		0.0212355	0.0495356	-1.22199	22	32	1014	614	0.416297	-0.876357	0.00186043	(-1.4283550942493053, -0.32435831664148895)	0.917067	1	1		-	-
47	chr10	50745132	50745132	T	C	ASAH2B	startloss	ASAH2B:NM_001321958:exon3:c.T2C:p.M1T,ASAH2B:NM_001321959:exon3:c.T2C:p.M1T,ASAH2B:NM_001321960:exon4:c.T2C:p.M1T	5.336	0.161058	0.303333	-0.913326	67	91	349	209	0.440914	-0.818905	7.82712e-06	(-1.1779815275939893, -0.459827587133011)	0.243435	1	1	rs2813328	-	-
50	chr10	58360922	58360923	AA	-	UBE2D1				0.0250965	0.0154799	0.697094	26	10	1010	636	1.63723	0.493004	0.189244	(-0.24302396533505466, 1.2290327623995623)	0.917067	1	1	rs764541748	['Cellular response to hypoxia', 'Oxygen-dependent proline hydroxylation of Hypoxia-inducible Factor Alpha', 'Adaptive Immune System', 'Inhibition of the proteolytic activity of APC/C required for the onset of anaphase by mitotic spindle checkpoint components', 'Inactivation of APC/C via direct inhibition of the APC/C complex', 'Cell Cycle', 'Toll Like Receptor 4 (TLR4) Cascade', 'MyD88-independe…	3
61	chr10	73911531	73911531	C	T	C10orf55				0.00868726	0.0170279	-0.970925	9	11	1027	635	0.505887	-0.681443	0.131903	(-1.5679203707864482, 0.2050345577904128)	0.917067	1	1	rs2227579	-	-
65	chr10	79305614	79305614	C	G	ZMIZ1				0.0260618	0.0123839	1.07347	27	8	1009	638	2.13404	0.758019	0.0617057	(-0.03714610921538719, 1.5531832838467374)	0.917067	1	1	rs113334887	-	2
78	chr10	86668637	86668637	C	A	LDB3				0.00579151	0.0108359	-0.90381	6	7	1030	639	0.531761	-0.63156	0.258238	(-1.7264412192052236, 0.46332060585841317)	0.917067	1	1	rs34972863	-	-
83	chr10	88828516	88828516	C	T	ANKRD22				0.003861	0.0108359	-1.48877	4	7	1032	639	0.353821	-1.03897	0.0984744	(-2.271393189525819, 0.19346263032702615)	0.917067	1	1	rs3814692	-	-
88	chr10	90918987	90918987	-	T	ANKRD1				0.00482625	0.0139319	-1.52941	5	9	1031	637	0.343248	-1.0693	0.0562219	(-2.1669703978131998, 0.028367411119366803)	0.917067	1	1	rs60923931	['Metabolism', 'PPARA activates gene expression', 'Regulation of lipid metabolism by PPARalpha', 'Metabolism of lipids']	2
92	chr10	93960672	93960672	A	G	PIPSL				0.0173745	0.00773994	1.16658	18	5	1018	641	2.2668	0.818368	0.107211	(-0.17735906304770166, 1.8140952735922338)	0.917067	1	1	rs111525022	-	-
93	chr10	94268899	94268899	C	T	PLCE1				0.0212355	0.0108359	0.970659	22	7	1014	639	1.98056	0.683379	0.117764	(-0.1728875579774708, 1.5396447070362873)	0.917067	1	1	rs142022516	['Metabolism', 'Inositol phosphate metabolism', 'Synthesis of IP3 and IP4 in the cytosol']	12
109	chr10	99535518	99535520	GGC	-	NKX2-3	nonframeshift deletion	NKX2-3:NM_145285:exon2:c.892_894del:p.G305del		0.0445682	0.03125	0.51216	32	14	686	434	1.44606	0.368845	0.258243	(-0.270596922628344, 1.0082878817463208)	0.917067	1	1	rs779308945	-	-
132	chr10	131163191	131163191	C	T	TCERG1L	nonsynonymous SNV	TCERG1L:NM_174937:exon6:c.G965A:p.G322E	8.966	0.042471	0.0185759	1.19305	44	12	992	634	2.34341	0.851609	0.00977615	(0.20557557182889952, 1.4976420907363286)	0.917067	1	1	rs118074196	-	-
134	chr10	132836205	132836205	C	T	CFAP46	nonsynonymous SNV	CFAP46:NM_001200049:exon46:c.G6550A:p.G2184S	7.913	0.0299228	0.0123839	1.27278	31	8	1005	638	2.45995	0.900141	0.0243465	(0.11659545278502392, 1.683686798528825)	0.917067	1	1	rs76581191	-	-
1	chr12	322420	322420	T	A	KDM5A	nonsynonymous SNV	KDM5A:NM_001042603:exon17:c.A2423T:p.H808L	18.26	0.00675676	0.0170279	-1.33349	7	11	1029	635	0.392703	-0.934703	0.0545075	(-1.8874809556595764, 0.018075234290746423)	0.917067	1	1	rs74894801	['HDMs demethylate histones', 'Chromatin modifying enzymes', 'Chromatin organization']	2
3	chr12	323211	323211	A	-	KDM5A				0.0386313	0.0858586	-1.15219	35	51	871	543	0.427838	-0.84901	0.000174545	(-1.2923651633483444, -0.4056552929586155)	0.917067	1	1	rs60377454	['HDMs demethylate histones', 'Chromatin modifying enzymes', 'Chromatin organization']	2
15	chr12	6917143	6917143	G	C	ENO2				0.003861	0.0170279	-2.14085	4	11	1032	635	0.223749	-1.49723	0.0106252	(-2.6458638821767515, -0.3485958354778409)	0.917067	1	1	rs2071417	['Metabolism', 'Glycolysis', 'Gluconeogenesis', 'Glucose metabolism', 'Metabolism of carbohydrates', 'Carbohydrate metabolism']	-
16	chr12	6917745	6917745	A	T	ENO2				0.0212766	0.0464396	-1.12609	22	30	1012	616	0.446377	-0.806592	0.00469697	(-1.365780900981407, -0.24740272825405518)	0.917067	1	1		['Metabolism', 'Glycolysis', 'Gluconeogenesis', 'Glucose metabolism', 'Metabolism of carbohydrates', 'Carbohydrate metabolism']	-
23	chr12	8930568	8930568	C	T	PHC1	nonsynonymous SNV	PHC1:NM_004426:exon7:c.C746T:p.A249V	24.2	0.0260618	0.0154799	0.751541	27	10	1009	636	1.70188	0.531735	0.154691	(-0.20056882734395176, 1.2640394593375457)	0.917067	1	1	rs200063610	['PIP3 activates AKT signaling', 'Signal Transduction', 'Generic Transcription Pathway', 'Cellular responses to stress', 'Oxidative Stress Induced Senescence', 'Cellular Senescence', 'PTEN Regulation', 'RNA Polymerase II Transcription', 'Gene expression (Transcription)', 'Regulation of PTEN gene transcription', 'Transcriptional Regulation by E2F6', 'Cellular responses to stimuli', 'Intracellular …	-
34	chr12	14949865	14949865	C	G	ARHGDIB	nonsynonymous SNV	ARHGDIB:NM_001175:exon3:c.G202C:p.V68L,ARHGDIB:NM_001321421:exon3:c.G202C:p.V68L,ARHGDIB:NM_001321422:exon3:c.G202C:p.V68L,ARHGDIB:NM_001321423:exon3:c.G202C:p.V68L,ARHGDIB:NM_001321420:exon4:c.G202C:p.V68L	8.579	0.00579151	0.0154799	-1.41838	6	10	1030	636	0.370485	-0.992941	0.0556562	(-2.0098770393907155, 0.02399475609161561)	0.917067	1	1	rs41276686	['Signal Transduction', 'Signaling by Rho GTPases', 'RHOA GTPase cycle', 'RHO GTPase cycle', 'CDC42 GTPase cycle', 'RAC1 GTPase cycle', 'RHOH GTPase cycle', 'RHOG GTPase cycle', 'RAC3 GTPase cycle', 'Signaling by Rho GTPases, Miro GTPases and RHOBTB3']	-
53	chr12	47996652	47996652	A	T	COL2A1				0.03861	0.0185759	1.05555	40	12	996	634	2.12182	0.752275	0.0238945	(0.09953105342279545, 1.4050179489343315)	0.917067	1	1	rs41317883	['Adaptive Immune System', 'Collagen degradation', 'Degradation of the extracellular matrix', 'Extracellular matrix organization', 'Collagen formation', 'Signal Transduction', 'Collagen biosynthesis and modifying enzymes', 'Immune System', 'Signaling by PDGF', 'Immunoregulatory interactions between a Lymphoid and a non-Lymphoid cell', 'Assembly of collagen fibrils and other multimeric structures'…	6
55	chr12	48917004	48917004	C	A	CCDC65	nonsynonymous SNV	CCDC65:NM_001286957:exon4:c.C76A:p.H26N,CCDC65:NM_033124:exon4:c.C505A:p.H169N	15.02	0.0357143	0.0185759	0.943073	37	12	999	634	1.95679	0.671305	0.0457649	(0.01263316262327252, 1.329977714666519)	0.917067	1	1	rs79716342	-	-
59	chr12	50430492	50430492	C	G	LARP4				0.0337838	0.0170279	0.988433	35	11	1001	635	2.01844	0.702323	0.0443997	(0.017584621649971655, 1.3870613948870565)	0.917067	1	1	rs77680811	-	-
62	chr12	53296405	53296405	T	-	PFDN5				0.967181	0.981424	-0.0210902	1002	634	34	12	0.557803	-0.58375	0.0856161	(-1.2493308919387487, 0.08183179669759466)	0.917067	1	1	rs553312552	['Prefoldin mediated transfer of substrate to CCT/TriC', 'Cooperation of Prefoldin and TriC/CCT in actin and tubulin folding', 'Chaperonin-mediated protein folding', 'Protein folding', 'Metabolism of proteins']	-
78	chr12	70661166	70661166	C	A	PTPRR				0.0144788	0.0309598	-1.09646	15	20	1021	626	0.459843	-0.77687	0.024466	(-1.453677586002284, -0.10006145303041081)	0.917067	1	1	rs75405399	-	-
85	chr12	92707119	92707119	T	A	C12orf74	nonsynonymous SNV	C12orf74:NM_001037671:exon2:c.T488A:p.L163Q,C12orf74:NM_001178097:exon2:c.T488A:p.L163Q	3.296	0.0241313	0.0510836	-1.08196	25	33	1011	613	0.459341	-0.777962	0.0039657	(-1.3072374794190547, -0.24868655994602462)	0.917067	1	1	rs71456571	-	-
87	chr12	93572726	93572726	C	G	SOCS2				0.0250965	0.0123839	1.01902	26	8	1010	638	2.05297	0.719288	0.0775098	(-0.07930815324869844, 1.5178834929509621)	0.917067	1	1	rs41477552	['Metabolism of proteins', 'Post-translational protein modification', 'Neddylation', 'Cytokine Signaling in Immune system', 'Immune System', 'FLT3 Signaling', 'Negative regulation of FLT3', 'Interleukin-7 signaling', 'Signaling by Interleukins', 'Growth hormone receptor signaling']	10
95	chr12	101682701	101682701	C	T	MYBPC1				0.0685328	0.0356037	0.944767	71	23	965	623	1.99293	0.689604	0.00494617	(0.20869675442853275, 1.1705114026927328)	0.917067	1	1	rs35621105	['Striated Muscle Contraction', 'Muscle contraction']	9
97	chr12	107702985	107702985	T	C	PWP1	nonsynonymous SNV	PWP1:NM_001317962:exon9:c.T671C:p.M224T,PWP1:NM_001317963:exon9:c.T221C:p.M74T,PWP1:NM_007062:exon9:c.T857C:p.M286T	23.8	0.0125483	0.00309598	2.01902	13	2	1023	644	4.09189	1.40901	0.0641713	(-0.08295442964584043, 2.90096670375448)	0.917067	1	1	rs141450163	-	0
99	chr12	108623488	108623488	T	C	SELPLG	nonsynonymous SNV	SELPLG:NM_001206609:exon2:c.A868G:p.M290V,SELPLG:NM_003006:exon2:c.A820G:p.M274V	0.66	0.0202703	0.0108359	0.903545	21	7	1015	639	1.88867	0.635873	0.14781	(-0.2252327187153944, 1.4969784218549074)	0.917067	1	1	rs7300972	['Hemostasis', 'Cell surface interactions at the vascular wall']	29
108	chr12	113207348	113207348	A	-	IQCD				0.023166	0.00928793	1.31858	24	6	1012	640	2.52964	0.928079	0.0432814	(0.028021962574456882, 1.828135412677938)	0.917067	1	1	rs781198848	-	-
111	chr12	120737875	120737875	C	T	ACADS	nonsynonymous SNV	ACADS:NM_000017:exon5:c.C511T:p.R171W	23.7	0.0405405	0.0247678	0.710899	42	16	994	630	1.66373	0.509064	0.0877632	(-0.0753307775894041, 1.093457795134587)	0.917067	1	1	rs1800556	['Metabolism', 'Metabolism of lipids', 'mitochondrial fatty acid beta-oxidation of saturated fatty acids', 'Mitochondrial Fatty Acid Beta-Oxidation', 'Beta oxidation of hexanoyl-CoA to butanoyl-CoA', 'Beta oxidation of butanoyl-CoA to acetyl-CoA', 'Fatty acid metabolism']	-
113	chr12	121001795	121001795	G	A	C12orf43;HNF1A				0.0212355	0.0123839	0.778014	22	8	1014	638	1.73028	0.548281	0.187448	(-0.26695124647647406, 1.3635132682207574)	0.917067	1	1	rs11065390	-	-
116	chr12	121814457	121814457	T	A	SETD1B	nonsynonymous SNV	SETD1B:NM_001353345:exon6:c.T2242A:p.F748I	9.914	0.0262136	0.0140625	0.898462	27	9	1003	631	1.88734	0.635167	0.101836	(-0.12576815948286202, 1.3961028859776357)	0.917067	1	1		['Generic Transcription Pathway', 'PKMTs methylate histone lysines', 'Chromatin modifying enzymes', 'Chromatin organization', 'RNA Polymerase II Transcription', 'Gene expression (Transcription)', 'Transcriptional regulation by RUNX1', 'RUNX1 regulates genes involved in megakaryocyte differentiation and platelet function']	-
120	chr12	122850382	122850382	G	T	HIP1R				0.050813	0.0289017	0.814042	25	10	467	336	1.79872	0.587073	0.123292	(-0.15956179441078666, 1.3337070627477092)	0.917067	1	1	rs7489275	['Membrane Trafficking', 'trans-Golgi Network Vesicle Budding', 'Golgi Associated Vesicle Biogenesis', 'Vesicle-mediated transport', 'Clathrin-mediated endocytosis']	5
123	chr12	123484228	123484228	A	T	RILPL1	nonsynonymous SNV	RILPL1:NM_001319243:exon6:c.T1019A:p.I340N,RILPL1:NM_001319244:exon6:c.T566A:p.I189N,RILPL1:NM_178314:exon6:c.T1019A:p.I340N,RILPL1:NM_001319302:exon7:c.T566A:p.I189N	11.57	0.00675676	0.0139319	-1.04399	7	9	1029	637	0.481481	-0.730888	0.14899	(-1.7235467315970507, 0.2617717145114652)	0.917067	1	1		-	-
124	chr12	123602109	123602109	C	T	DDX55				0.0144788	0.0278638	-0.944452	15	18	1021	628	0.512569	-0.668319	0.0585108	(-1.360699922916801, 0.02406150593595935)	0.917067	1	1	rs113620982	-	-
125	chr12	123660025	123660025	-	T	GTF2H3				0.0106178	0.0263158	-1.30945	11	17	1025	629	0.397073	-0.923635	0.0179449	(-1.6885181662125364, -0.15875124604729074)	0.917067	1	1	rs763305633	['Formation of RNA Pol II elongation complex ', 'Formation of the Early Elongation Complex', 'Generic Transcription Pathway', 'Transcriptional Regulation by TP53', 'Formation of Incision Complex in GG-NER', 'Nucleotide Excision Repair', 'Global Genome Nucleotide Excision Repair (GG-NER)', 'Dual Incision in GG-NER', 'RNA Polymerase II Pre-transcription Events', 'Formation of TC-NER Pre-Incision Co…	0
132	chr12	128616212	128616212	C	G	TMEM132C	nonsynonymous SNV	TMEM132C:NM_001136103:exon4:c.C1182G:p.S394R	23.1	0.0318533	0.0139319	1.19305	33	9	1003	637	2.32868	0.845302	0.0258997	(0.10159685819842568, 1.5890068452825494)	0.917067	1	1	rs117965239	-	-
133	chr12	130872100	130872100	G	A	RAN			20.6	0.0299228	0.0154799	0.95085	31	10	1005	636	1.96179	0.673858	0.0664767	(-0.04581310187803633, 1.3935288105541292)	0.917067	1	1	rs11546491	['Metabolism', 'Cell Cycle', 'Regulation of cholesterol biosynthesis by SREBP (SREBF)', 'Gene Silencing by RNA', 'Mitotic Metaphase and Anaphase', 'Nuclear Envelope (NE) Reassembly', 'Metabolism of lipids', 'Transcriptional regulation by small RNAs', 'Mitotic Anaphase', 'M Phase', 'Cell Cycle, Mitotic', 'Gene expression (Transcription)', 'Metabolism of steroids', 'Postmitotic nuclear pore complex…	0
136	chr12	132247745	132247745	A	0	GALNT9				0.030754	0.0251572	0.289799	31	16	977	620	1.22953	0.206631	0.507902	(-0.4050360821230984, 0.8182986986065391)	0.917067	1	1		['Metabolism of proteins', 'O-linked glycosylation', 'Post-translational protein modification', 'O-linked glycosylation of mucins']	14
5	chr5	840546	840546	A	G	ZDHHC11	nonsynonymous SNV	ZDHHC11:NM_024786:exon5:c.T733C:p.F245L	0.001	0.0415058	0.0185759	1.15988	43	12	993	634	2.28785	0.827612	0.0122531	(0.18001200186633481, 1.475211510728895)	0.917067	1	1	rs201008730	-	-
9	chr5	5443147	5443147	-	T	ICE1				0.00675676	0.0170279	-1.33349	7	11	1029	635	0.392703	-0.934703	0.0545075	(-1.8874809556595764, 0.018075234290746423)	0.917067	1	1	rs540424430	['RNA polymerase II transcribes snRNA genes', 'RNA Polymerase II Transcription', 'Gene expression (Transcription)']	0
16	chr5	13841936	13841936	-	G	DNAH5				0.0299228	0.0170807	0.808873	31	11	1005	633	1.77503	0.57382	0.105617	(-0.12118590407853369, 1.268824970754084)	0.917067	1	1	rs35337694	-	4
56	chr5	78450040	78450040	T	-	SCAMP1				0.0212355	0.00928793	1.19305	22	6	1014	640	2.31427	0.839093	0.0701369	(-0.0690070190940858, 1.747192971759786)	0.917067	1	1	rs754197071	['Innate Immune System', 'Immune System', 'Neutrophil degranulation']	11
57	chr5	79731911	79731911	C	T	CMYA5	nonsynonymous SNV	CMYA5:NM_153610:exon2:c.C3146T:p.T1049I	10.53	0.0183398	0.0356037	-0.957052	19	23	1017	623	0.506049	-0.681121	0.0301548	(-1.2968688733277185, -0.0653733547199139)	0.917067	1	1	rs115180914	-	-
61	chr5	82312744	82312744	T	C	ATP6AP1L	nonsynonymous SNV	ATP6AP1L:NM_001017971:exon9:c.T265C:p.Y89H,ATP6AP1L:NM_001349371:exon9:c.T265C:p.Y89H,ATP6AP1L:NM_001349374:exon9:c.T568C:p.Y190H,ATP6AP1L:NM_001349372:exon10:c.T265C:p.Y89H,ATP6AP1L:NM_001349373:exon11:c.T265C:p.Y89H	26.8	0.00289575	0.0108359	-1.90381	3	7	1033	639	0.265109	-1.32762	0.0550094	(-2.6837119329829457, 0.02848018272433106)	0.917067	1	1	rs61740965	-	-
65	chr5	96883857	96883857	C	T	ERAP2	nonsynonymous SNV	ERAP2:NM_001130140:exon3:c.C641T:p.P214L,ERAP2:NM_001329229:exon3:c.C641T:p.P214L,ERAP2:NM_001329233:exon3:c.C641T:p.P214L,ERAP2:NM_022350:exon3:c.C641T:p.P214L	32	0.0144788	0.00619195	1.22547	15	4	1021	642	2.35798	0.857806	0.128941	(-0.2495364344492279, 1.965149085464459)	0.917067	1	1	rs3733905	['Adaptive Immune System', 'Immune System', 'Class I MHC mediated antigen processing & presentation', 'Antigen Presentation: Folding, assembly and peptide loading of class I MHC']	-
67	chr5	98883842	98883861	TATATATATATATATATATA	0	CHD1				0.0631068	0.130573	-1.04899	26	41	386	273	0.448502	-0.801841	0.00228669	(-1.317074814346812, -0.28660739157858195)	0.917067	1	1		['Signal Transduction', 'ESR-mediated signaling', 'Signaling by Nuclear Receptors', 'Estrogen-dependent gene expression']	-
68	chr5	111113035	111113035	-	ATATAT	WDR36				0.0103448	0.0201342	-0.960741	9	12	861	584	0.508711	-0.675876	0.128125	(-1.5465016856308105, 0.19475049752824136)	0.917067	1	1	rs376288151	['Major pathway of rRNA processing in the nucleolus and cytosol', 'rRNA processing', 'rRNA processing in the nucleus and cytosol', 'Metabolism of RNA', 'rRNA modification in the nucleus and cytosol']	19
72	chr5	112976805	112976805	C	A	DCP2				0.0337838	0.0154799	1.12594	35	10	1001	636	2.22378	0.799207	0.0273195	(0.08943249321894753, 1.5089810118215916)	0.917067	1	1	rs61746772	['Butyrate Response Factor 1 (BRF1) binds and destabilizes mRNA', 'Regulation of mRNA stability by proteins that bind AU-rich elements', 'Metabolism of RNA', 'Deadenylation-dependent mRNA decay', "mRNA decay by 5' to 3' exoribonuclease", 'Tristetraprolin (TTP, ZFP36) binds and destabilizes mRNA', 'KSRP (KHSRP) binds and destabilizes mRNA', 'Cellular responses to stress', 'ATF4 activates genes in …	-
73	chr5	115840495	115840495	A	T	ATG12				0.0106178	0.0185759	-0.806949	11	12	1025	634	0.566992	-0.56741	0.177187	(-1.3915170702928883, 0.2566964420430624)	0.917067	1	1	rs147706083	['Macroautophagy', 'Autophagy', 'Mitophagy', 'PINK1-PRKN Mediated Mitophagy', 'Receptor Mediated Mitophagy', 'Selective autophagy', 'Innate Immune System', 'Immune System', 'DDX58/IFIH1-mediated induction of interferon-alpha/beta', 'Negative regulators of DDX58/IFIH1 signaling']	23
83	chr5	135951324	135951324	C	T	LECT2	nonsynonymous SNV	LECT2:NM_002302:exon3:c.G188A:p.G63E	24.1	0.015444	0.0294118	-0.929345	16	19	1020	627	0.517647	-0.658462	0.0549538	(-1.3308945814372335, 0.013971336293124859)	0.917067	1	1	rs149560293	-	-
95	chr5	148828097	148828098	CC	-	ADRB2				0.0436893	0.0185759	1.23385	45	12	985	634	2.41371	0.881163	0.00737415	(0.23661186632828957, 1.5257144401666225)	0.917067	1	1	rs796421355	['Signal Transduction', 'Signaling by GPCR', 'Class A/1 (Rhodopsin-like receptors)', 'Amine ligand-binding receptors', 'GPCR downstream signalling', 'Adrenoceptors', 'Metabolism of proteins', 'G alpha (s) signalling events', 'GPCR ligand binding', 'Deubiquitination', 'Ub-specific processing proteases', 'Post-translational protein modification', 'Membrane Trafficking', 'Vesicle-mediated transport'…	5
96	chr5	149301154	149301154	G	A	AFAP1L1	nonsynonymous SNV	AFAP1L1:NM_001146337:exon4:c.G251A:p.R84Q,AFAP1L1:NM_001323062:exon4:c.G251A:p.R84Q,AFAP1L1:NM_001323063:exon4:c.G251A:p.R84Q,AFAP1L1:NM_152406:exon4:c.G251A:p.R84Q	17.93	0.015444	0.0356037	-1.20498	16	23	1020	623	0.424893	-0.855917	0.00938503	(-1.5017057992027676, -0.21012796315769555)	0.917067	1	1	rs61734415	-	-
100	chr5	151549373	151549373	C	T	FAT2	nonsynonymous SNV	FAT2:NM_001447:exon8:c.G4711A:p.G1571S	27.1	0.00675676	0.0154799	-1.19599	7	10	1029	636	0.432653	-0.837819	0.0907861	(-1.808745961937651, 0.1331077290723317)	0.917067	1	1	rs10044879	-	16
106	chr5	160119006	160119006	T	C	PWWP2A	nonsynonymous SNV	PWWP2A:NM_001130864:exon1:c.A383G:p.E128G,PWWP2A:NM_001267035:exon1:c.A383G:p.E128G,PWWP2A:NM_052927:exon1:c.A383G:p.E128G	12.67	0.0588803	0.0340557	0.789888	61	22	975	624	1.77455	0.573544	0.0238992	(0.07586706225823292, 1.0712215541149188)	0.917067	1	1	rs56806495	-	-
112	chr5	176103785	176103785	G	A	FAM153B				0.015444	0.0309598	-1.00335	16	20	1020	626	0.49098	-0.711351	0.035998	(-1.376232105258055, -0.046470067726799846)	0.917067	1	1	rs201406144	-	-
114	chr5	176294964	176294964	-	A	SIMC1				0.0354331	0.015674	1.17672	36	10	980	628	2.30694	0.835921	0.0206154	(0.12818568440966205, 1.5436571961216283)	0.917067	1	1	rs772834830	-	-
115	chr5	176656027	176656027	C	T	TSPAN17				0.0482625	0.0216718	1.15508	50	14	986	632	2.28919	0.828199	0.00691466	(0.22720507756534947, 1.4291923531488706)	0.917067	1	1	rs78677496	-	-
120	chr5	177604997	177604997	C	T	B4GALT7				0.023166	0.0433437	-0.90381	24	28	1012	618	0.523433	-0.647346	0.0220853	(-1.201663312421001, -0.09302883201295675)	0.917067	1	1	rs116141371	['Metabolism', 'Glycosaminoglycan metabolism', 'Heparan sulfate/heparin (HS-GAG) metabolism', 'Chondroitin sulfate/dermatan sulfate metabolism', 'A tetrasaccharide linker sequence is required for GAG synthesis', 'Metabolism of carbohydrates', 'Disease', 'Diseases associated with glycosaminoglycan metabolism', 'Defective B4GALT7 causes EDS, progeroid type', 'Diseases of glycosylation', 'Diseases o…	6
1	chr20	2484338	2484338	T	C	ZNF343	nonsynonymous SNV	ZNF343:NM_001282498:exon4:c.A353G:p.N118S,ZNF343:NM_001282496:exon6:c.A623G:p.N208S,ZNF343:NM_001321800:exon6:c.A623G:p.N208S,ZNF343:NM_001321805:exon6:c.A620G:p.N207S,ZNF343:NM_024325:exon6:c.A623G:p.N208S,ZNF343:NM_001282495:exon7:c.A623G:p.N208S,ZNF343:NM_001282497:exon7:c.A746G:p.N249S,ZNF343:NM_001321801:exon7:c.A746G:p.N249S,ZNF343:NM_001321802:exon7:c.A743G:p.N248S,ZNF343:NM_001321803:exon…	0.002	0.0125483	0.0309598	-1.30291	13	20	1023	626	0.397752	-0.921927	0.0104096	(-1.6272367329674904, -0.2166178889204724)	0.917067	1	1	rs61745440	['Generic Transcription Pathway', 'RNA Polymerase II Transcription', 'Gene expression (Transcription)']	-
2	chr20	3659872	3659872	G	A	GFRA4				0.0434363	0.0201238	1.11	45	13	991	633	2.21105	0.793469	0.0128575	(0.16832296903481092, 1.4186150712111298)	0.917067	1	1	rs73611721	['Developmental Biology', 'Signal Transduction', 'Axon guidance', 'RAF/MAP kinase cascade', 'MAPK family signaling cascades', 'MAPK1/MAPK3 signaling', 'RET signaling', 'Nervous system development', 'NCAM signaling for neurite out-growth', 'NCAM1 interactions']	1
3	chr20	3668986	3668993	TCTGGACT	-	ADAM33	frameshift deletion	ADAM33:NM_153202:exon21:c.2334_2341del:p.Q778Hfs*13,ADAM33:NM_001282447:exon22:c.2409_2416del:p.Q803Hfs*13,ADAM33:NM_025220:exon22:c.2412_2419del:p.Q804Hfs*13		0.0482625	0.0216718	1.15508	50	14	986	632	2.28919	0.828199	0.00691466	(0.22720507756534947, 1.4291923531488706)	0.917067	1	1	rs146576636	-	-
15	chr20	25071483	25071483	-	TT	VSX1				0.0200803	0.00773994	1.37539	20	5	976	641	2.62705	0.965861	0.0546292	(-0.01917356043486096, 1.9508960236897974)	0.917067	1	1		-	-
20	chr20	30909853	30909853	-	GAAA	FRG1BP;DEFB115				0.105903	0.2	-0.91726	61	76	515	304	0.473786	-0.746999	6.19291e-05	(-1.1125335801400922, -0.38146377060097625)	0.917067	1	1		-	-
25	chr20	33217658	33217658	C	A	BPIFA3	nonsynonymous SNV	BPIFA3:NM_001042439:exon1:c.C122A:p.A41E,BPIFA3:NM_178466:exon1:c.C122A:p.A41E	22.6	0.0299228	0.0170279	0.813347	31	11	1005	635	1.78064	0.576974	0.103707	(-0.11801757631232734, 1.2719657964849094)	0.917067	1	1	rs17124391	-	-
31	chr20	37944199	37944199	G	C	VSTM2L	nonsynonymous SNV	VSTM2L:NM_080607:exon4:c.G561C:p.K187N	23.7	0.003861	0.00928793	-1.26638	4	6	1032	640	0.413437	-0.883251	0.172508	(-2.1522396347129424, 0.38573787912103374)	0.917067	1	1		-	-
35	chr20	44407508	44407508	T	A	HNF4A				0.0405405	0.0247678	0.710899	42	16	994	630	1.66373	0.509064	0.0877632	(-0.0753307775894041, 1.093457795134587)	0.917067	1	1		['Generic Transcription Pathway', 'Nuclear Receptor transcription pathway', 'RNA Polymerase II Transcription', 'Gene expression (Transcription)']	2
38	chr20	45882618	45882618	G	A	ZSWIM1	stopgain	ZSWIM1:NM_080603:exon2:c.G26A:p.W9X	23.6	0.00868726	0.0201238	-1.21193	9	13	1027	633	0.42671	-0.851652	0.0510799	(-1.7073002760682288, 0.003997140248829356)	0.917067	1	1	rs35972756	-	-
44	chr20	49568117	49568117	-	GCGGGGCTG	PTGIS				0.0139442	0.0283912	-1.02577	14	18	990	616	0.483951	-0.725772	0.0438107	(-1.4314073634837645, -0.020137452268279232)	0.917067	1	1	rs773006734	['Metabolism', 'Synthesis of bile acids and bile salts', 'Synthesis of bile acids and bile salts via 7alpha-hydroxycholesterol', 'Synthesis of bile acids and bile salts via 24-hydroxycholesterol', 'Synthesis of bile acids and bile salts via 27-hydroxycholesterol', 'Bile acid and bile salt metabolism', 'Nicotinate metabolism', 'Metabolism of water-soluble vitamins and cofactors', 'Metabolism of vi…	6
47	chr20	57616331	57616331	C	A	ZBP1	nonsynonymous SNV	ZBP1:NM_001160417:exon2:c.G172T:p.V58F,ZBP1:NM_001160419:exon2:c.G172T:p.V58F,ZBP1:NM_030776:exon2:c.G172T:p.V58F	23.5	0.003861	0.0139319	-1.85134	4	9	1032	637	0.274332	-1.29341	0.0319652	(-2.4753393581234224, -0.11148965524792609)	0.917067	1	1	rs34917164	['ZBP1(DAI) mediated induction of type I IFNs', 'IRF3 mediated activation of type 1 IFN', 'Disease', 'Innate Immune System', 'Immune System', 'RIP-mediated NFkB activation via ZBP1', 'Cytosolic sensors of pathogen-associated DNA ', 'Regulation of innate immune responses to cytosolic DNA', 'Infectious disease', 'Potential therapeutics for SARS', 'SARS-CoV Infections']	-
49	chr20	61570692	61570692	G	A	CDH4				0.00868726	0.0216718	-1.31885	9	14	1027	632	0.395604	-0.927341	0.0311254	(-1.770570902832247, -0.08411023328923195)	0.917067	1	1	rs73914867	['Developmental Biology', 'Cell-Cell communication', 'Adherens junctions interactions', 'Cell-cell junction organization', 'Cell junction organization', 'Myogenesis']	1
52	chr20	62342303	62342303	A	-	LAMA5				0.00968992	0.0201238	-1.05435	10	13	1022	633	0.476441	-0.741411	0.0801106	(-1.5717539973111174, 0.08893277113718778)	0.917067	1	1	rs762726186	['Cytokine Signaling in Immune system', 'Degradation of the extracellular matrix', 'Extracellular matrix organization', 'Signal Transduction', 'Immune System', 'Laminin interactions', 'Non-integrin membrane-ECM interactions', 'ECM proteoglycans', 'Signaling by Interleukins', 'Interleukin-4 and Interleukin-13 signaling', 'Signaling by MET', 'MET activates PTK2 signaling', 'MET promotes cell motili…	9
54	chr20	62952789	62952789	G	A	SLC17A9				0.0106178	0.0278638	-1.39191	11	18	1025	628	0.374417	-0.982384	0.0109364	(-1.7390232558698497, -0.22574516453435878)	0.917067	1	1	rs139060051	-	-
56	chr20	63344412	63344412	C	T	CHRNA4				0.021	0.00928793	1.17696	21	6	979	640	2.28805	0.8277	0.0755104	(-0.08504136264643081, 1.740440367283582)	0.917067	1	1	rs45617937	['Neurotransmitter receptors and postsynaptic signal transmission', 'Transmission across Chemical Synapses', 'Neuronal System', 'Acetylcholine binding and downstream events', 'Presynaptic nicotinic acetylcholine receptors', 'Postsynaptic nicotinic acetylcholine receptors', 'Highly calcium permeable postsynaptic nicotinic acetylcholine receptors', 'Highly calcium permeable nicotinic acetylcholine …	15
61	chr20	63694480	63694480	C	A	RTEL1	nonsynonymous SNV	RTEL1:NM_001283010:exon30:c.C2432A:p.P811H,RTEL1:NM_001283009:exon31:c.C3101A:p.P1034H,RTEL1:NM_016434:exon31:c.C3101A:p.P1034H,RTEL1:NM_032957:exon31:c.C3173A:p.P1058H	16.95	0.0135135	0.0263158	-0.961526	14	17	1022	629	0.506849	-0.679542	0.0622387	(-1.3938412522784875, 0.03475819527015522)	0.917067	1	1	rs115610405	['Telomere Maintenance', 'Cell Cycle', 'Telomere Extension By Telomerase', 'Extension of Telomeres', 'Chromosome Maintenance', 'Metabolism', 'Cytosolic iron-sulfur cluster assembly', 'HDR through Homologous Recombination (HRR)', 'DNA Double-Strand Break Repair', 'Resolution of D-Loop Structures', 'Homology Directed Repair', 'Resolution of D-loop Structures through Synthesis-Dependent Strand Annea…	0
24	chr22	20564628	20564628	-	CAG	MED15	nonframeshift insertion	MED15:NM_001293236:exon5:c.417_418insCAG:p.Q147_H148insQ,MED15:NM_001003891:exon6:c.630_631insCAG:p.Q218_H219insQ,MED15:NM_001293234:exon6:c.630_631insCAG:p.Q218_H219insQ,MED15:NM_001293235:exon6:c.552_553insCAG:p.Q192_H193insQ,MED15:NM_001293237:exon6:c.552_553insCAG:p.Q192_H193insQ,MED15:NM_015889:exon6:c.630_631insCAG:p.Q218_H219insQ		0.0173745	0.00773994	1.16658	18	5	1018	641	2.2668	0.818368	0.107211	(-0.17735906304770166, 1.8140952735922338)	0.917067	1	1	rs748572492	['Generic Transcription Pathway', 'RNA Polymerase II Transcription', 'Gene expression (Transcription)', 'Developmental Biology', 'Metabolism', 'PPARA activates gene expression', 'Transcriptional regulation of white adipocyte differentiation', 'Regulation of lipid metabolism by PPARalpha', 'Metabolism of lipids']	2
34	chr22	22358002	22358002	G	T	BMS1P20;ZNF280B				0.023166	0.0123839	0.903545	24	8	1012	638	1.8913	0.637267	0.121346	(-0.1689963490700619, 1.44352979340104)	0.917067	1	1	rs189262307	-	-
46	chr22	25319807	25319807	G	A	IGLL3P				0.027027	0.0123839	1.12594	28	8	1008	638	2.21528	0.795378	0.049021	(0.003412288270714714, 1.5873433181469734)	0.917067	1	1	rs78723566	-	-
50	chr22	28844454	28844454	A	-	XBP1;ZNRF3				0.0223881	0.0520446	-1.21702	18	28	786	510	0.417121	-0.874379	0.00445076	(-1.4768976661606517, -0.2718599718190976)	0.917067	1	1	rs769434355	-	-
51	chr22	28844457	28844470	AAGAAGAAGAAGAA	-	XBP1;ZNRF3				0.0147783	0.0332103	-1.16815	12	18	800	524	0.436667	-0.828585	0.0279156	(-1.5672791335127503, -0.08989116939734731)	0.917067	1	1	rs753413930	-	-
53	chr22	28844464	28844464	A	0	XBP1;ZNRF3				0.0223005	0.0555556	-1.31686	19	31	833	527	0.387755	-0.947381	0.00140391	(-1.528759819205673, -0.3660028186827001)	0.917067	1	1		-	-
56	chr22	29971085	29971085	A	-	MTMR3				0.0482625	0.0201238	1.262	50	13	986	633	2.46918	0.903888	0.00416652	(0.2855911305582852, 1.5221843004580142)	0.917067	1	1	rs545862845	['Metabolism', 'PI Metabolism', 'Phospholipid metabolism', 'Macroautophagy', 'Synthesis of PIPs at the plasma membrane', 'Metabolism of lipids', 'Autophagy']	12
59	chr22	31715002	31715002	G	A	PRR14L	nonsynonymous SNV	PRR14L:NM_173566:exon4:c.C2837T:p.P946L	0.15	0.0260618	0.0108359	1.26611	27	7	1009	639	2.44273	0.893116	0.0365359	(0.05593340457529594, 1.7302988973705875)	0.917067	1	1	rs117343825	-	-
64	chr22	36253958	36253958	C	T	APOL1				0.0250965	0.0123839	1.01902	26	8	1010	638	2.05297	0.719288	0.0775098	(-0.07930815324869844, 1.5178834929509621)	0.917067	1	1	rs139494181	['Scavenging of heme from plasma', 'Binding and Uptake of Ligands by Scavenger Receptors', 'Regulation of Insulin-like Growth Factor (IGF) transport and uptake by Insulin-like Growth Factor Binding Proteins (IGFBPs)', 'Metabolism of proteins', 'Vesicle-mediated transport', 'Post-translational protein modification', 'Post-translational protein phosphorylation']	5
65	chr22	36937762	36937762	G	A	CSF2RB	nonsynonymous SNV	CSF2RB:NM_000395:exon14:c.G1954A:p.V652M	0.048	0.0318533	0.0154799	1.04105	33	10	1003	636	2.09252	0.73837	0.0428043	(0.023930796712524516, 1.4528096909887172)	0.917067	1	1	rs1801114	['Cytokine Signaling in Immune system', 'Signal Transduction', 'Immune System', 'Signaling by Interleukins', 'Interleukin-2 family signaling', 'Interleukin-3, Interleukin-5 and GM-CSF signaling', 'RAF/MAP kinase cascade', 'MAPK family signaling cascades', 'MAPK1/MAPK3 signaling', 'Interleukin receptor SHC signaling', 'Metabolism of proteins', 'Surfactant metabolism', 'Disease', 'Diseases of metab…	1
66	chr22	37089548	37089548	T	A	TMPRSS6				0.00680934	0.0186916	-1.4568	7	12	1021	630	0.359941	-1.02181	0.032646	(-1.959237243543155, -0.08439175548039235)	0.917067	1	1		['Degradation of the extracellular matrix', 'Extracellular matrix organization', 'Collagen degradation']	9
70	chr22	37713220	37713220	C	G	TRIOBP	nonsynonymous SNV	TRIOBP:NM_001039141:exon5:c.C265G:p.P89A	0.002	0.0173745	0.0325077	-0.90381	18	21	1018	625	0.526242	-0.641994	0.0483665	(-1.2793801846377348, -0.0046082697649156845)	0.917067	1	1	rs199646135	-	-
86	chr22	44365649	44365649	G	A	SHISAL1;LINC01656				0.0144788	0.00619195	1.22547	15	4	1021	642	2.35798	0.857806	0.128941	(-0.2495364344492279, 1.965149085464459)	0.917067	1	1	rs143763029	-	-
2	chr17	413476	413596	CCTCAAGGGCTTCCACCCCGACCCCGACGCCCTCAAGGGCTTCCACCCCGACCCCGAGGCCCTCAAGGGCTTCCACCCCGACCCCGAGGCCCTCAAGGGCATCCACCCCGACCCCGAGGCT	0	C17orf97				0.0128458	0.033123	-1.36653	13	21	999	613	0.379856	-0.967963	0.00664148	(-1.6669159978387098, -0.2690098481097465)	0.917067	1	1		-	-
3	chr17	413497	413735	CCCCGACGCCCTCAAGGGCTTCCACCCCGACCCCGAGGCCCTCAAGGGCTTCCACCCCGACCCCGAGGCCCTCAAGGGCATCCACCCCGACCCCGAGGCTCTCAAGGGCTTCCACCCCGACCCCGAGGCCCTCAAGGGCTTCCACCCCGACCCTGAGGCCCTCAAGGGTTTCCACACTGACCCCGAGGCCCTCAAGGGTTTCCACATTGACCCCGAGGCCCTCAAGGGCTTCCACCCCG	0	C17orf97				0.0118343	0.031746	-1.4236	12	20	1002	610	0.365269	-1.00712	0.00630981	(-1.729841038388631, -0.2843988580982547)	0.917067	1	1		-	-
7	chr17	1775219	1775219	A	T	SERPINF1				0.0299228	0.0154799	0.95085	31	10	1005	636	1.96179	0.673858	0.0664767	(-0.04581310187803633, 1.3935288105541292)	0.917067	1	1		-	-
8	chr17	2036598	2036598	C	T	DPH1	nonsynonymous SNV	DPH1:NM_001346576:exon4:c.C65T:p.T22I,DPH1:NM_001346574:exon5:c.C485T:p.T162I,DPH1:NM_001346575:exon5:c.C485T:p.T162I,DPH1:NM_001383:exon5:c.C485T:p.T162I	12.03	0.0202703	0.00928793	1.12594	21	6	1015	640	2.2069	0.791587	0.0891407	(-0.12107737023846987, 1.7042518769848662)	0.917067	1	1	rs116911386	['Gamma carboxylation, hypusine formation and arylsulfatase activation', 'Metabolism of proteins', 'Synthesis of diphthamide-EEF2', 'Post-translational protein modification']	-
15	chr17	3695840	3695840	G	C	P2RX5-TAX1BP3				0.0357143	0.0216718	0.720681	37	14	999	632	1.67196	0.513995	0.105874	(-0.10901097229808998, 1.1370013693526295)	0.917067	1	1		-	-
19	chr17	4548281	4548281	T	C	MYBBP1A	nonsynonymous SNV	MYBBP1A:NM_001105538:exon12:c.A1586G:p.K529R,MYBBP1A:NM_014520:exon12:c.A1586G:p.K529R	0.014	0.0106178	0.0216718	-1.02934	11	14	1025	632	0.48446	-0.724721	0.0743094	(-1.5206096591112228, 0.07116855062614469)	0.917067	1	1	rs73337533	['Epigenetic regulation of gene expression', 'Positive epigenetic regulation of rRNA expression', 'B-WICH complex positively regulates rRNA expression', 'Gene expression (Transcription)']	0
21	chr17	4739332	4739332	C	G	CXCL16	nonsynonymous SNV	CXCL16:NM_001100812:exon1:c.G65C:p.R22P,CXCL16:NM_022059:exon1:c.G65C:p.R22P	6.147	0.00772201	0.0185759	-1.26638	8	12	1028	634	0.411154	-0.888787	0.0529382	(-1.7888420601649737, 0.011268860792876811)	0.917067	1	1	rs151229852	['Signal Transduction', 'Signaling by GPCR', 'Class A/1 (Rhodopsin-like receptors)', 'Peptide ligand-binding receptors', 'Chemokine receptors bind chemokines', 'GPCR downstream signalling', 'G alpha (i) signalling events', 'GPCR ligand binding']	7
28	chr17	7042968	7042968	T	C	SLC16A11	nonsynonymous SNV	SLC16A11:NM_153357:exon2:c.A308G:p.D103G,SLC16A11:NM_001370549:exon3:c.A308G:p.D103G,SLC16A11:NM_001370553:exon3:c.A308G:p.D103G	13.23	0.015444	0.0263158	-0.768881	16	17	1020	629	0.580392	-0.544051	0.122186	(-1.2339300477332698, 0.14582750494464936)	0.917067	1	1	rs13342692	-	-
29	chr17	7414613	7414613	G	A	NLGN2				0.030888	0.0154799	0.996654	32	10	1004	636	2.02709	0.706602	0.053409	(-0.01037606764592236, 1.4235802134341797)	0.917067	1	1	rs12952579	['Neuronal System', 'Neurexins and neuroligins', 'Protein-protein interactions at synapses']	3
31	chr17	7482552	7482552	G	A	SLC35G6	nonsynonymous SNV	SLC35G6:NM_001102614:exon2:c.G568A:p.A190T	0.133	0.0164093	0.00773994	1.08412	17	5	1019	641	2.13876	0.760228	0.137007	(-0.24178146477200757, 1.7622371754121287)	0.917067	1	1	rs11658286	-	-
36	chr17	7798207	7798207	G	A	DNAH2	nonsynonymous SNV	DNAH2:NM_020877:exon54:c.G8281A:p.V2761M	24.5	0.0173745	0.0340557	-0.970925	18	22	1018	624	0.501518	-0.690116	0.0320219	(-1.3209529538943143, -0.05927809451206878)	0.917067	1	1	rs35295135	-	4
37	chr17	7833162	7833162	T	A	DNAH2	nonsynonymous SNV	DNAH2:NM_020877:exon85:c.T13070A:p.V4357D	31	0.00868726	0.0170279	-0.970925	9	11	1027	635	0.505887	-0.681443	0.131903	(-1.5679203707864482, 0.2050345577904128)	0.917067	1	1	rs78354379	-	4
54	chr17	19062047	19062047	G	A	SNORD3B-1;SNORD3B-2				0.00524109	0.0142405	-1.44206	5	9	949	623	0.364711	-1.00865	0.0717548	(-2.1065262098729702, 0.08922832042378137)	0.917067	1	1	rs202137670	-	-
67	chr17	28330060	28330062	AAA	-	IFT20				0.0140562	0.0325077	-1.20957	14	21	982	625	0.424304	-0.857305	0.0139782	(-1.5409528727810815, -0.17365666067137775)	0.917067	1	1		['Organelle biogenesis and maintenance', 'Cilium Assembly', 'Intraflagellar transport']	13
73	chr17	29562625	29562625	C	T	ABHD15	nonsynonymous SNV	ABHD15:NM_198147:exon2:c.G1343A:p.R448Q	24.4	0.0366795	0.0216718	0.759155	38	14	998	632	1.71887	0.541665	0.0872497	(-0.07914770666332582, 1.1624776025563675)	0.917067	1	1	rs62070804	-	-
75	chr17	31181801	31181801	-	TT	NF1				0.0183752	0.00773994	1.24737	19	5	1015	641	2.3998	0.875387	0.0831094	(-0.11468983522499232, 1.8654630995792363)	0.917067	1	1	rs373999174	['Signal Transduction', 'Regulation of RAS by GAPs', 'RAF/MAP kinase cascade', 'MAPK family signaling cascades', 'MAPK1/MAPK3 signaling', 'Disease', 'Diseases of signal transduction by growth factor receptors and second messengers', 'RAS signaling downstream of NF1 loss-of-function variants', 'Oncogenic MAPK signaling']	3
91	chr17	40409195	40409199	AAAAA	-	TOP2A				0.0525701	0.0210526	1.32024	45	12	811	558	2.58015	0.947847	0.00402134	(0.3020074890281982, 1.5936860074682357)	0.917067	1	1		['SUMOylation', 'SUMO E3 ligases SUMOylate target proteins', 'Metabolism of proteins', 'SUMOylation of DNA replication proteins', 'Post-translational protein modification', 'Transcription of E2F targets under negative control by DREAM complex', 'G0 and Early G1', 'Cell Cycle', 'Mitotic G1 phase and G1/S transition', 'Cell Cycle, Mitotic']	2
103	chr17	41502942	41502942	T	C	KRT13	nonsynonymous SNV	KRT13:NM_002274:exon4:c.A892G:p.T298A,KRT13:NM_153490:exon4:c.A892G:p.T298A	0.026	0.98166	0.989164	-0.0109861	1017	639	19	7	0.58636	-0.533821	0.23031	(-1.406031180177557, 0.3383894032973541)	0.917067	1	1	rs4796697	['Developmental Biology', 'Keratinization', 'Formation of the cornified envelope']	-
106	chr17	42339256	42339257	AA	-	STAT3				0.0222008	0.0123839	0.842144	23	8	1013	638	1.81071	0.593719	0.151109	(-0.2168455085015787, 1.4042844151924205)	0.917067	1	1		['Interleukin-6 signaling', 'Interleukin-7 signaling', 'Cytokine Signaling in Immune system', 'Signaling by SCF-KIT', 'Signal Transduction', 'Immune System', 'Downstream signal transduction', 'Signaling by PDGF', 'Signaling by ALK', 'Interleukin-1 family signaling', 'Interleukin-12 family signaling', 'Signaling by Interleukins', 'Interleukin-2 family signaling', 'Interleukin-6 family signaling', …	1
107	chr17	42554578	42554578	C	T	HSD17B1	nonsynonymous SNV	HSD17B1:NM_000413:exon5:c.C713T:p.A238V,HSD17B1:NM_001330219:exon5:c.C716T:p.A239V	9.016	0.0173745	0.00773994	1.16658	18	5	1018	641	2.2668	0.818368	0.107211	(-0.17735906304770166, 1.8140952735922338)	0.917067	1	1	rs147402365	['Metabolism', 'Estrogen biosynthesis', 'Metabolism of steroid hormones', 'Metabolism of lipids', 'Metabolism of steroids', 'Visual phototransduction', 'The canonical retinoid cycle in rods (twilight vision)', 'Sensory Perception']	-
114	chr17	46337241	46337241	G	C	ARL17A				0.943299	0.973404	-0.045324	366	183	22	5	0.454545	-0.788457	0.11746	(-1.7755697633349612, 0.19865504260641909)	0.917067	1	1	rs273544	-	-
116	chr17	47049703	47049703	G	T	RPRML;CDC27				0.0328185	0.0185759	0.821082	34	12	1002	634	1.79275	0.58375	0.0856161	(-0.08183179669759466, 1.2493308919387487)	0.917067	1	1	rs551695549	-	-
117	chr17	48037644	48037644	C	-	COPZ2				0.0144788	0.0278638	-0.944452	15	18	1021	628	0.512569	-0.668319	0.0585108	(-1.360699922916801, 0.02406150593595935)	0.917067	1	1	rs566093515	['ER to Golgi Anterograde Transport', 'Membrane Trafficking', 'Metabolism of proteins', 'Asparagine N-linked glycosylation', 'Vesicle-mediated transport', 'Post-translational protein modification', 'COPI-mediated anterograde transport', 'COPI-dependent Golgi-to-ER retrograde traffic', 'Intra-Golgi and retrograde Golgi-to-ER traffic', 'Golgi-to-ER retrograde transport', 'Transport to the Golgi and…	4
123	chr17	50627150	50627150	G	A	CACNA1G				0.0170683	0.0371517	-1.12211	17	24	979	622	0.450034	-0.798432	0.0129049	(-1.4278196660920344, -0.16904440607408677)	0.917067	1	1	rs141032183	['Developmental Biology', 'NCAM signaling for neurite out-growth', 'NCAM1 interactions', 'Axon guidance', 'Nervous system development']	15
130	chr17	64661887	64661895	GGCGGCGGG	-	SMURF2				0.0269122	0.0442478	-0.717346	19	20	687	432	0.59738	-0.515202	0.114236	(-1.1545289046772478, 0.12412490794567)	0.917067	1	1	rs544040158	['Adaptive Immune System', 'Signal Transduction', 'Immune System', 'Signaling by TGF-beta Receptor Complex', 'Signaling by WNT', 'Signaling by BMP', 'TCF dependent signaling in response to WNT', 'Generic Transcription Pathway', 'Downregulation of TGF-beta receptor signaling', 'TGF-beta receptor signaling activates SMADs', 'Transcriptional activity of SMAD2/SMAD3:SMAD4 heterotrimer', 'Downregulati…	3
136	chr17	68554743	68554743	A	T	FAM20A				0.00675676	0.0170279	-1.33349	7	11	1029	635	0.392703	-0.934703	0.0545075	(-1.8874809556595764, 0.018075234290746423)	0.917067	1	1		['Regulation of Insulin-like Growth Factor (IGF) transport and uptake by Insulin-like Growth Factor Binding Proteins (IGFBPs)', 'Metabolism of proteins', 'Post-translational protein modification', 'Post-translational protein phosphorylation']	5
139	chr17	69124856	69124856	T	C	ABCA6				0.011583	0.0232198	-1.00335	12	15	1024	631	0.492969	-0.707309	0.070161	(-1.4728538354130611, 0.05823484666816181)	0.917067	1	1	rs78773510	['ABC transporters in lipid homeostasis', 'Generic Transcription Pathway', 'Transport of small molecules', 'ABC-family proteins mediated transport', 'RNA Polymerase II Transcription', 'Gene expression (Transcription)', 'FOXO-mediated transcription', 'FOXO-mediated transcription of oxidative stress, metabolic and neuronal genes']	-
142	chr17	74935803	74935803	T	C	OTOP3	startloss	OTOP3:NM_178233:exon1:c.T2C:p.M1?	23.2	0.00482625	0.0123839	-1.35949	5	8	1031	638	0.38676	-0.94995	0.0969435	(-2.071654410587481, 0.1717547507516708)	0.917067	1	1	rs368367098	-	-
143	chr17	75213125	75213125	G	T	NUP85				0.0222008	0.0108359	1.03479	23	7	1013	639	2.07263	0.728817	0.0935547	(-0.12300668167597473, 1.5806407156813498)	0.917067	1	1	rs61751840	['Amplification of signal from the kinetochores', 'Amplification of signal from unattached kinetochores via a MAD2 inhibitory signal', 'Transport of the SLBP independent Mature mRNA', 'Transport of the SLBP Dependant Mature mRNA', 'Transport of Mature mRNA Derived from an Intronless Transcript', 'Transport of Mature mRNAs Derived from Intronless Transcripts', 'Transport of Mature mRNA derived fro…	0
152	chr17	76540250	76540250	-	GG	PRCD				0.0135659	0.0247678	-0.868482	14	16	1018	630	0.541503	-0.613407	0.0968552	(-1.3375284320390843, 0.11071489134026102)	0.917067	1	1	rs774019278	-	-
155	chr17	80087999	80087999	T	A	CCDC40				0.0723938	0.0309598	1.22547	75	20	961	626	2.44277	0.893132	0.000506556	(0.3897171982734856, 1.3965464059507644)	0.917067	1	1		-	-
156	chr17	80117560	80117560	C	G	GAA				0.0135135	0.00309598	2.12594	14	2	1022	644	4.41096	1.48409	0.0501204	(-0.0007793008943790536, 2.9689635096864144)	0.917067	1	1	rs201904830	['Metabolism', 'Innate Immune System', 'Immune System', 'Neutrophil degranulation', 'Glycogen breakdown (glycogenolysis)', 'Metabolism of carbohydrates', 'Glycogen metabolism', 'Disease', 'Glycogen storage diseases', 'Glycogen storage disease type II (GAA)', 'Diseases of carbohydrate metabolism', 'Diseases of metabolism']	-
165	chr17	82716932	82716932	T	G	FN3KRP				0.0135135	0.0278638	-1.04399	14	18	1022	628	0.47793	-0.738291	0.0402509	(-1.4437554422421481, -0.03282662291056593)	0.917067	1	1	rs111645942	['Gamma carboxylation, hypusine formation and arylsulfatase activation', 'Metabolism of proteins', 'Post-translational protein modification']	-
1	chr18	49492	49492	G	A	TUBB8B				0.0106178	0.0216718	-1.02934	11	14	1025	632	0.48446	-0.724721	0.0743094	(-1.5206096591112228, 0.07116855062614469)	0.917067	1	1	rs561695039	['Hemostasis', 'Neurotransmitter receptors and postsynaptic signal transmission', 'Transmission across Chemical Synapses', 'Neuronal System', 'Developmental Biology', 'Adaptive Immune System', 'Translocation of SLC2A4 (GLUT4) to the plasma membrane', 'Gap junction trafficking and regulation', 'Signal Transduction', 'Macroautophagy', 'Cell Cycle', 'Disease', 'Immune System', 'Organelle biogenesis …	4
4	chr18	3534226	3534226	C	T	DLGAP1	nonsynonymous SNV	DLGAP1:NM_001003809:exon7:c.G1541A:p.R514Q,DLGAP1:NM_001242762:exon7:c.G1499A:p.R500Q,DLGAP1:NM_001242764:exon7:c.G1565A:p.R522Q,DLGAP1:NM_001242765:exon7:c.G1541A:p.R514Q,DLGAP1:NM_001242763:exon8:c.G1613A:p.R538Q,DLGAP1:NM_001242766:exon8:c.G1571A:p.R524Q,DLGAP1:NM_001308390:exon8:c.G1595A:p.R532Q,DLGAP1:NM_001242761:exon10:c.G2447A:p.R816Q,DLGAP1:NM_004746:exon10:c.G2447A:p.R816Q	23.3	0.00772201	0.0185759	-1.26638	8	12	1028	634	0.411154	-0.888787	0.0529382	(-1.7888420601649737, 0.011268860792876811)	0.917067	1	1	rs35822832	['Neuronal System', 'Neurexins and neuroligins', 'Protein-protein interactions at synapses']	3
15	chr18	27952340	27952340	T	C	CDH2	nonsynonymous SNV	CDH2:NM_001308176:exon15:c.A2441G:p.N814S,CDH2:NM_001792:exon16:c.A2534G:p.N845S	22.6	0.0366795	0.0185759	0.981547	38	12	998	634	2.01169	0.698975	0.0369369	(0.04237726662610808, 1.3555731095021857)	0.917067	1	1	rs2289664	['Cell-Cell communication', 'Regulation of Insulin-like Growth Factor (IGF) transport and uptake by Insulin-like Growth Factor Binding Proteins (IGFBPs)', 'Metabolism of proteins', 'Adherens junctions interactions', 'Cell-cell junction organization', 'Cell junction organization', 'Post-translational protein modification', 'Post-translational protein phosphorylation', 'Developmental Biology', 'Myo…	1
24	chr18	46088241	46088241	T	C	ATP5F1A	nonsynonymous SNV	ATP5F1A:NM_001001935:exon6:c.A517G:p.I173V,ATP5F1A:NM_001257334:exon6:c.A601G:p.I201V,ATP5F1A:NM_001257335:exon6:c.A517G:p.I173V,ATP5F1A:NM_004046:exon6:c.A667G:p.I223V,ATP5F1A:NM_001001937:exon7:c.A667G:p.I223V	19.52	0.003861	0.0123839	-1.68142	4	8	1032	638	0.309109	-1.17406	0.0560322	(-2.3783429173710866, 0.030217230857760624)	0.917067	1	1	rs77958705	['The citric acid (TCA) cycle and respiratory electron transport', 'Metabolism', 'Mitochondrial biogenesis', 'Respiratory electron transport, ATP synthesis by chemiosmotic coupling, and heat production by uncoupling proteins.', 'Formation of ATP by chemiosmotic coupling', 'Organelle biogenesis and maintenance', 'Cristae formation', 'Mitochondrial protein import', 'Protein localization']	-
31	chr18	57648477	57648477	G	A	ATP8B1				0.0164093	0.0340557	-1.05339	17	22	1019	624	0.473191	-0.748256	0.0220816	(-1.388963153947584, -0.10754839436321006)	0.917067	1	1	rs34255016	['Transport of small molecules', 'Ion transport by P-type ATPases', 'Ion channel transport']	-
4	chr21	9342464	9342464	T	C	TEKT4P2;LOC105379511				0.0207469	0.0444079	-1.09792	20	27	944	581	0.455901	-0.78548	0.00876916	(-1.372872835223543, -0.1980871682643126)	0.917067	1	1	rs796878716	-	-
13	chr21	34792308	34792308	A	C	RUNX1	nonsynonymous SNV	RUNX1:NM_001001890:exon6:c.T1189G:p.S397A,RUNX1:NM_001754:exon9:c.T1270G:p.S424A	25	0.0318533	0.0154799	1.04105	33	10	1003	636	2.09252	0.73837	0.0428043	(0.023930796712524516, 1.4528096909887172)	0.917067	1	1		['Generic Transcription Pathway', 'Transport of small molecules', 'Transport of bile salts and organic acids, metal ions and amine compounds', 'SLC-mediated transmembrane transport', 'Organic cation transport', 'Organic cation/anion/zwitterion transport', 'RNA Polymerase II Transcription', 'Gene expression (Transcription)', 'Transcriptional regulation by RUNX1', 'Regulation of RUNX1 Expression an…	1
16	chr21	35038611	35038647	CTCTGTGTGTGTGTGTGTGTGTGTGTGTGTGTGTGTG	0	RUNX1-IT1				0.024558	0.0125	0.974262	25	8	993	632	1.98892	0.687593	0.0930334	(-0.1147706833170693, 1.4899567098971693)	0.917067	1	1		-	-
21	chr21	39312978	39312978	C	G	BRWD1				0.834135	0.904459	-0.116774	347	284	69	30	0.531231	-0.632559	0.00660074	(-1.0889780083943175, -0.1761391539045849)	0.917067	1	1	rs71316131	['Interleukin-7 signaling', 'Cytokine Signaling in Immune system', 'Immune System', 'Chromatin modifying enzymes', 'Signaling by Interleukins', 'Chromatin organization']	2
23	chr21	41179203	41179203	T	G	PLAC4				0.0328185	0.0201238	0.705605	34	13	1002	633	1.65223	0.502128	0.128131	(-0.1446972962655262, 1.1489539115735075)	0.917067	1	1	rs77271505	-	-
24	chr21	42396450	42396450	G	A	TMPRSS3				0.0120724	0.0278638	-1.20667	12	18	982	628	0.426341	-0.852516	0.0234306	(-1.589784717032871, -0.11524778295599103)	0.917067	1	1	rs117381866	-	-
4	chr6	4127841	4127841	G	A	C6orf201;ECI2				0.0202703	0.00773994	1.38897	21	5	1015	641	2.65241	0.97547	0.0511405	(-0.00483393283116984, 1.9557741142993792)	0.917067	1	1	rs116302350	-	-
8	chr6	10758910	10758914	TTTTT	-	TMEM14B				0.0153374	0.029595	-0.948298	15	19	963	623	0.510739	-0.671896	0.0543432	(-1.3563183600923563, 0.012527017942549623)	0.917067	1	1		-	-
12	chr6	16327755	16327755	T	A	ATXN1	nonsynonymous SNV	ATXN1:NM_001128164:exon7:c.A556T:p.S186C,ATXN1:NM_000332:exon8:c.A556T:p.S186C,ATXN1:NM_001357857:exon8:c.A527T:p.Q176L	10.81	0.00289575	0.0108359	-1.90381	3	7	1033	639	0.265109	-1.32762	0.0550094	(-2.6837119329829457, 0.02848018272433106)	0.917067	1	1	rs112175378	-	-
17	chr6	21594616	21594616	C	G	SOX4	nonsynonymous SNV	SOX4:NM_003107:exon1:c.C82G:p.L28V	24.5	0.015444	0.0309598	-1.00335	16	20	1020	626	0.49098	-0.711351	0.035998	(-1.376232105258055, -0.046470067726799846)	0.917067	1	1	rs140231408	['Signal Transduction', 'Signaling by WNT', 'TCF dependent signaling in response to WNT', 'Deactivation of the beta-catenin transactivating complex']	2
43	chr6	39934496	39934496	A	C	MOCS1				0.0202703	0.0123839	0.710899	21	8	1015	638	1.65	0.500775	0.231503	(-0.3195385221136162, 1.3210890979385959)	0.917067	1	1		['Metabolism', 'Metabolism of water-soluble vitamins and cofactors', 'Metabolism of vitamins and cofactors', 'Molybdenum cofactor biosynthesis']	-
49	chr6	43629679	43629679	G	A	MAD2L1BP				0.0106178	0.0185759	-0.806949	11	12	1025	634	0.566992	-0.56741	0.177187	(-1.3915170702928883, 0.2566964420430624)	0.917067	1	1	rs116563579	-	-
56	chr6	52493365	52493365	-	ATATAT	EFHC1				0.0381443	0.0232919	0.711639	37	15	933	629	1.66295	0.508594	0.101328	(-0.09980169036103481, 1.1169892251512574)	0.917067	1	1	rs150550566	-	-
59	chr6	55759145	55759145	A	0	BMP5				0.0130719	0.0267559	-1.03339	12	16	906	582	0.481788	-0.730251	0.0582239	(-1.485931557858559, 0.02542969633191361)	0.917067	1	1		-	2
61	chr6	57053800	57053800	T	G	KIAA1586	nonsynonymous SNV	KIAA1586:NM_001286274:exon3:c.T1220G:p.I407R,KIAA1586:NM_001286275:exon4:c.T1100G:p.I367R,KIAA1586:NM_001286276:exon4:c.T1100G:p.I367R,KIAA1586:NM_020931:exon4:c.T1301G:p.I434R	24.4	0.003861	0.0123839	-1.68142	4	8	1032	638	0.309109	-1.17406	0.0560322	(-2.3783429173710866, 0.030217230857760624)	0.917067	1	1	rs202156522	-	-
71	chr6	83398481	83398481	T	A	ME1	nonsynonymous SNV	ME1:NM_002395:exon3:c.A248T:p.E83V	31	0.00868726	0.0185759	-1.09646	9	12	1027	634	0.462999	-0.77003	0.0827548	(-1.6399440453840424, 0.09988338949781572)	0.917067	1	1	rs151111787	['The citric acid (TCA) cycle and respiratory electron transport', 'Metabolism', 'Pyruvate metabolism', 'Pyruvate metabolism and Citric Acid (TCA) cycle', 'PPARA activates gene expression', 'Regulation of lipid metabolism by PPARalpha', 'Metabolism of lipids']	-
72	chr6	89637797	89637797	T	A	LYRM2	nonsynonymous SNV	LYRM2:NM_020466:exon2:c.A131T:p.Y44F	26	0.003861	0.0123839	-1.68142	4	8	1032	638	0.309109	-1.17406	0.0560322	(-2.3783429173710866, 0.030217230857760624)	0.917067	1	1	rs151021837	-	-
74	chr6	98875384	98875384	T	C	FBXL4				0.0395753	0.0216718	0.868779	41	14	995	632	1.86016	0.620661	0.0478684	(0.005825600061289626, 1.2354971880933392)	0.917067	1	1	rs78865887	['Adaptive Immune System', 'Immune System', 'Metabolism of proteins', 'Post-translational protein modification', 'Neddylation', 'Antigen processing: Ubiquitination & Proteasome degradation', 'Class I MHC mediated antigen processing & presentation']	10
75	chr6	99482751	99482751	A	G	USP45;USP45	nonsynonymous SNV	USP45:NM_001346033:exon8:c.T847C:p.W283R,USP45:NM_032929:exon8:c.T847C:p.W283R	24.6	0.00059453	0.00928793	-3.96553	0	6	1036	640	0.0514801	-2.96656	0.0439878	(-5.853232167703335, -0.07988962480408635)	0.917067	1	1	rs17850034	-	-
80	chr6	109528987	109528987	-	A	AK9				0.0241313	0.0108359	1.15508	25	7	1011	639	2.25731	0.814175	0.0586486	(-0.029773854771545927, 1.6581236771114463)	0.917067	1	1	rs552385212	['Metabolism', 'Metabolism of nucleotides', 'Interconversion of nucleotide di- and triphosphates']	-
81	chr6	109727286	109727286	-	TT	FIG4				0.0501931	0.0232198	1.11213	52	15	984	631	2.22304	0.798873	0.00724416	(0.21580978598939893, 1.3819371799469549)	0.917067	1	1	rs532856136	['Metabolism', 'PI Metabolism', 'Phospholipid metabolism', 'Synthesis of PIPs at the Golgi membrane', 'Synthesis of PIPs at the early endosome membrane', 'Synthesis of PIPs at the late endosome membrane', 'Metabolism of lipids']	-
84	chr6	111367879	111367879	C	T	REV3L	nonsynonymous SNV	REV3L:NM_002912:exon15:c.G5909A:p.R1970H,REV3L:NM_001286432:exon16:c.G5675A:p.R1892H,REV3L:NM_001286431:exon17:c.G5675A:p.R1892H	22.7	0.00772201	0.0170279	-1.14085	8	11	1028	635	0.449239	-0.800199	0.0868882	(-1.7162735479497004, 0.11587519146779479)	0.917067	1	1	rs3218606	['Translesion synthesis by REV1', 'Translesion synthesis by Y family DNA polymerases bypasses lesions on DNA template', 'Translesion synthesis by POLK', 'Translesion synthesis by POLI', 'DNA Damage Bypass', 'DNA Repair']	-
86	chr6	113970948	113970948	G	0	HDAC2-AS2				0.0289575	0.0139319	1.05555	30	9	1006	637	2.11067	0.747005	0.0513808	(-0.0044777450876584135, 1.4984879635644863)	0.917067	1	1		-	-
106	chr6	136579809	136579809	-	A	MAP3K5				0.0125483	0.0263158	-1.06844	13	17	1023	629	0.470186	-0.754627	0.0424499	(-1.4835495340113032, -0.02570545768042498)	0.917067	1	1	rs201558467	['Cellular responses to stress', 'Oxidative Stress Induced Senescence', 'Cellular Senescence', 'Cellular responses to stimuli']	3
107	chr6	136656244	136656244	A	G	MAP3K5				0.00868726	0.0201238	-1.21193	9	13	1027	633	0.42671	-0.851652	0.0510799	(-1.7073002760682288, 0.003997140248829356)	0.917067	1	1	rs73558206	['Cellular responses to stress', 'Oxidative Stress Induced Senescence', 'Cellular Senescence', 'Cellular responses to stimuli']	3
111	chr6	149399056	149399056	T	A	TAB2				0.046332	0.0340557	0.444113	48	22	988	624	1.37799	0.320626	0.22191	(-0.19385064876076408, 0.8351031051030335)	0.917067	1	1	rs12665296	['Cytokine Signaling in Immune system', 'Toll Like Receptor 4 (TLR4) Cascade', 'MyD88:MAL(TIRAP) cascade initiated on plasma membrane', 'MyD88-independent TLR4 cascade ', 'Toll Like Receptor 9 (TLR9) Cascade', 'Toll Like Receptor 10 (TLR10) Cascade', 'Toll Like Receptor 3 (TLR3) Cascade', 'Toll Like Receptor 5 (TLR5) Cascade', 'Toll Like Receptor TLR1:TLR2 Cascade', 'Toll Like Receptor 7/8 (TLR7/…	3
113	chr6	151016769	151016772	TTTT	-	MTHFD1L				0.0177866	0.00773994	1.20039	18	5	994	641	2.32153	0.842226	0.0973699	(-0.153546822786931, 1.8379990142392502)	0.917067	1	1		['Metabolism', 'Metabolism of folate and pterines', 'Metabolism of water-soluble vitamins and cofactors', 'Metabolism of vitamins and cofactors']	-
116	chr6	152455405	152455405	T	C	SYNE1				0.0242248	0.0108359	1.16066	25	7	1007	639	2.26628	0.818139	0.0574325	(-0.025818470315273845, 1.662096945258992)	0.917067	1	1	rs148626610	['Meiotic synapsis', 'Reproduction', 'Meiosis', 'Cell Cycle']	8
117	chr6	154827250	154827250	C	T	SCAF8				0.0183398	0.0123839	0.56651	19	8	1017	638	1.48992	0.398723	0.347564	(-0.4332398575492735, 1.230686507114943)	0.917067	1	1	rs184103324	-	-
130	chr6	170561957	170561957	A	0	TBP				0.0155039	0.00928793	0.739201	16	6	1016	640	1.67979	0.518669	0.28126	(-0.4247916144181052, 1.4621292168721394)	0.917067	1	1		['Signal Transduction', 'Epigenetic regulation of gene expression', 'Positive epigenetic regulation of rRNA expression', 'B-WICH complex positively regulates rRNA expression', 'RNA Polymerase II Pre-transcription Events', 'RNA polymerase II transcribes snRNA genes', 'RNA Polymerase I Transcription Initiation', 'RNA Polymerase I Promoter Escape', 'RNA Polymerase II Promoter Escape', 'RNA Polymeras…	0
0	chr7	816195	816215	CAGGTGCAGACCCCTCCCCCA	0	SUN1				0.0174081	0.0357143	-1.03674	18	23	1016	621	0.478346	-0.73742	0.0207133	(-1.362240950658875, -0.11259905781699253)	0.917067	1	1		['Meiotic synapsis', 'Reproduction', 'Meiosis', 'Cell Cycle']	8
8	chr7	2814361	2814361	C	T	GNA12	nonsynonymous SNV	GNA12:NM_001282441:exon2:c.G83A:p.R28Q	5.189	0.0212355	0.0108359	0.970659	22	7	1014	639	1.98056	0.683379	0.117764	(-0.1728875579774708, 1.5396447070362873)	0.917067	1	1	rs151253462	['Hemostasis', 'Signal Transduction', 'Signaling by GPCR', 'GPCR downstream signalling', 'G alpha (12/13) signalling events', 'Thrombin signalling through proteinase activated receptors (PARs)', 'Platelet activation, signaling and aggregation']	7
13	chr7	5313199	5313202	ACTG	0	TNRC18				0.0222008	0.0526316	-1.24532	23	34	1013	612	0.408687	-0.894806	0.00112879	(-1.4333898654318045, -0.3562211954149337)	0.917067	1	1		-	-
23	chr7	7969361	7969363	CCT	-	GLCCI1	nonframeshift deletion	GLCCI1:NM_138426:exon1:c.11_13del:p.S13del		0.0289575	0.0108359	1.41812	30	7	1006	639	2.72224	1.00145	0.0178511	(0.17280562965489432, 1.8301030429944896)	0.917067	1	1	rs752606827	-	-
24	chr7	11061768	11061768	T	0	PHF14				0.0559846	0.0371517	0.591601	58	24	978	622	1.53698	0.42982	0.0831559	(-0.05638681791496036, 0.9160260237206302)	0.917067	1	1		-	-
30	chr7	16580062	16580062	T	-	LRRC72				0.034749	0.0154799	1.16658	36	10	1000	636	2.2896	0.828377	0.0217665	(0.12075112694415258, 1.5360031326959465)	0.917067	1	1	rs778722862	-	-
32	chr7	20785338	20785340	CCG	-	SP8	nonframeshift deletion	SP8:NM_182700:exon2:c.477_479del:p.G165del,SP8:NM_198956:exon3:c.423_425del:p.G147del		0.0293542	0.0141956	1.04813	30	9	992	625	2.10013	0.742001	0.0529971	(-0.009594394064509792, 1.49359708761944)	0.917067	1	1	rs780422296	-	2
35	chr7	22817412	22817413	TT	-	TOMM7				0.0202703	0.0108359	0.903545	21	7	1015	639	1.88867	0.635873	0.14781	(-0.2252327187153944, 1.4969784218549074)	0.917067	1	1	rs763193399	['Macroautophagy', 'Mitophagy', 'PINK1-PRKN Mediated Mitophagy', 'Autophagy', 'Selective autophagy', 'Mitochondrial protein import', 'Protein localization']	-
40	chr7	27130315	27130315	A	G	HOXA4	nonsynonymous SNV	HOXA4:NM_002141:exon1:c.T419C:p.L140P	10.97	0.971326	0.939716	0.0477305	542	265	16	17	2.17311	0.776161	0.0293721	(0.07784641560651528, 1.4744751789332036)	0.917067	1	1	rs10251056	['Developmental Biology', 'Activation of anterior HOX genes in hindbrain development during early embryogenesis', 'Activation of HOX genes during differentiation']	1
51	chr7	38726283	38726283	C	T	VPS41	nonsynonymous SNV	VPS41:NM_080631:exon28:c.G2453A:p.R818H,VPS41:NM_014396:exon29:c.G2528A:p.R843H	32	0.0241313	0.00928793	1.37748	25	6	1011	640	2.63765	0.969889	0.0339705	(0.07339423125219968, 1.8663843946945842)	0.917067	1	1	rs1059508	-	30
52	chr7	38765525	38765525	C	T	VPS41				0.0396518	0.0201238	0.978482	41	13	993	633	2.01046	0.698362	0.0302676	(0.06659657410696729, 1.3301283605765808)	0.917067	1	1	rs117437004	-	30
55	chr7	44468285	44468285	G	A	NUDCD3				0.0582524	0.0278638	1.06393	60	18	970	628	2.15808	0.769217	0.00492834	(0.23301177802727757, 1.3054220205661338)	0.917067	1	1	rs113966537	-	13
63	chr7	45084206	45084206	C	0	NACAD				0.0311891	0.0218069	0.51626	32	14	994	628	1.44409	0.367482	0.257391	(-0.26845645396165707, 1.0034195199538418)	0.917067	1	1		-	-
69	chr7	48410588	48410588	C	G	ABCA13	nonsynonymous SNV	ABCA13:NM_152701:exon40:c.C12139G:p.L4047V	25.2	0.00675676	0.0154799	-1.19599	7	10	1029	636	0.432653	-0.837819	0.0907861	(-1.808745961937651, 0.1331077290723317)	0.917067	1	1	rs77147473	['Innate Immune System', 'Immune System', 'Neutrophil degranulation']	-
70	chr7	51083145	51083145	A	T	COBL	nonsynonymous SNV	COBL:NM_001287436:exon8:c.T1180A:p.Y394N,COBL:NM_001346441:exon8:c.T1180A:p.Y394N	19.17	0.0299807	0.0681115	-1.18387	31	44	1003	602	0.422868	-0.860696	0.000337234	(-1.3312646177487717, -0.39012692642368807)	0.917067	1	1		-	-
71	chr7	57119994	57119994	A	G	ZNF479	nonsynonymous SNV	ZNF479:NM_001370129:exon4:c.T1421C:p.F474S,ZNF479:NM_033273:exon5:c.T1421C:p.F474S	23.3	0.027027	0.0185759	0.540974	28	12	1008	634	1.46759	0.383623	0.271315	(-0.29988711700285176, 1.0671338493890818)	0.917067	1	1	rs200382632	['Generic Transcription Pathway', 'RNA Polymerase II Transcription', 'Gene expression (Transcription)']	-
72	chr7	64068856	64068856	C	A	ZNF727				0.0222008	0.0495356	-1.15786	23	32	1013	614	0.435649	-0.830918	0.00281036	(-1.3760000414186357, -0.28583648452560007)	0.917067	1	1	rs117560839	['Generic Transcription Pathway', 'RNA Polymerase II Transcription', 'Gene expression (Transcription)']	-
73	chr7	64069610	64069610	G	A	ZNF727			6.443	0.0144788	0.0294118	-1.02245	15	19	1021	627	0.484819	-0.72398	0.0380949	(-1.40820843407336, -0.03975167711858829)	0.917067	1	1	rs117420777	['Generic Transcription Pathway', 'RNA Polymerase II Transcription', 'Gene expression (Transcription)']	-
81	chr7	74400372	74400372	C	A	CLIP2	nonsynonymous SNV	CLIP2:NM_032421:exon14:c.C2778A:p.D926E,CLIP2:NM_003388:exon15:c.C2883A:p.D961E	17.3	0.0106178	0.0216718	-1.02934	11	14	1025	632	0.48446	-0.724721	0.0743094	(-1.5206096591112228, 0.07116855062614469)	0.917067	1	1	rs17145468	-	-
92	chr7	76500368	76500368	C	G	DTX2				0.0808383	0.171946	-1.08884	54	76	614	366	0.423538	-0.859111	6.02338e-06	(-1.2311806048195457, -0.48704117211612)	0.199045	1	1	rs917425	['Signaling by NOTCH', 'Signal Transduction', 'Signaling by NOTCH1', 'Activated NOTCH1 Transmits Signal to the Nucleus']	1
93	chr7	76515138	76515138	A	C	UPK3B	nonsynonymous SNV	UPK3B:NM_001347684:exon6:c.A765C:p.R255S,UPK3B:NM_182684:exon6:c.A765C:p.R255S	0.002	0.864583	0.951923	-0.13884	83	99	13	5	0.322455	-1.13179	0.0384936	(-2.2036460168032503, -0.059935357927605404)	0.917067	1	1	rs1799125	-	-
94	chr7	76515243	76515243	T	C	UPK3B	nonsynonymous SNV	UPK3B:NM_030570:exon4:c.T955C:p.W319R,UPK3B:NM_182683:exon5:c.T790C:p.W264R	0.001	0.940217	0.970588	-0.045865	173	165	11	5	0.476584	-0.741111	0.178007	(-1.8195368636209246, 0.33731438408678227)	0.917067	1	1	rs1799126	-	-
101	chr7	98192543	98192543	T	C	LMTK2	nonsynonymous SNV	LMTK2:NM_014916:exon11:c.T2078C:p.I693T	13.27	0.0125483	0.0232198	-0.887869	13	15	1023	631	0.534572	-0.62629	0.101375	(-1.3755807914063238, 0.12300129730415155)	0.917067	1	1	rs56204700	-	-
107	chr7	100211100	100211100	T	A	STAG3	nonsynonymous SNV	STAG3:NM_001282718:exon28:c.T3154A:p.S1052T,STAG3:NM_001282716:exon30:c.T3328A:p.S1110T,STAG3:NM_001282717:exon30:c.T3328A:p.S1110T,STAG3:NM_012447:exon30:c.T3328A:p.S1110T	22.5	0.0125483	0.0263158	-1.06844	13	17	1023	629	0.470186	-0.754627	0.0424499	(-1.4835495340113032, -0.02570545768042498)	0.917067	1	1		['Meiotic synapsis', 'Reproduction', 'Meiosis', 'Cell Cycle']	8
108	chr7	100589726	100589726	T	A	FBXO24	nonsynonymous SNV	FBXO24:NM_012172:exon1:c.T86A:p.V29D	22.7	0.011583	0.0263158	-1.18392	12	17	1024	629	0.433594	-0.835647	0.028048	(-1.5812667216357013, -0.09002776469875373)	0.917067	1	1	rs145042937	-	-
110	chr7	100792527	100792527	G	A	ZAN	nonsynonymous SNV	ZAN:NM_173059:exon42:c.G7835A:p.R2612Q	25.4	0.0212355	0.00928793	1.19305	22	6	1014	640	2.31427	0.839093	0.0701369	(-0.0690070190940858, 1.747192971759786)	0.917067	1	1	rs148236040	-	-
113	chr7	100996823	100996823	C	T	MUC12	nonsynonymous SNV	MUC12:NM_001164462:exon2:c.C6260T:p.T2087M	18.24	0.0219561	0.044586	-1.02197	22	28	980	600	0.48105	-0.731785	0.011502	(-1.2993490751659689, -0.1642208713647486)	0.917067	1	1		['Disease', 'Innate Immune System', 'Immune System', 'Diseases of glycosylation', 'Diseases associated with O-glycosylation of proteins', 'Metabolism of proteins', 'Defective GALNT3 causes familial hyperphosphatemic tumoral calcinosis (HFTC)', 'Defective C1GALT1C1 causes Tn polyagglutination syndrome (TNPS)', 'Defective GALNT12 causes colorectal cancer 1 (CRCS1)', 'O-linked glycosylation', 'Decti…	14
134	chr7	107248501	107248501	-	A	COG5				0.0328185	0.0154799	1.08412	34	10	1002	636	2.15808	0.769221	0.0342298	(0.05717873010189545, 1.4812626965329607)	0.917067	1	1	rs770454924	['ER to Golgi Anterograde Transport', 'Membrane Trafficking', 'Metabolism of proteins', 'Asparagine N-linked glycosylation', 'Vesicle-mediated transport', 'Post-translational protein modification', 'COPI-mediated anterograde transport', 'Intra-Golgi traffic', 'Intra-Golgi and retrograde Golgi-to-ER traffic', 'Transport to the Golgi and subsequent modification', 'Retrograde transport at the Trans-…	4
137	chr7	114690148	114690148	-	A	FOXP2				0.0216535	0.00773994	1.48421	22	5	994	641	2.83742	1.0429	0.0362511	(0.06680197463941018, 2.0189916077372123)	0.917067	1	1	rs543811999	-	-
140	chr7	116700208	116700208	A	G	MET	nonsynonymous SNV	MET:NM_000245:exon2:c.A1124G:p.N375S,MET:NM_001127500:exon2:c.A1124G:p.N375S,MET:NM_001324401:exon2:c.A1124G:p.N375S	10.73	0.0164093	0.00928793	0.821082	17	6	1019	640	1.77952	0.576345	0.227458	(-0.35959483808146264, 1.5122848739997707)	0.917067	1	1	rs33917957	['PIP3 activates AKT signaling', 'Developmental Biology', 'Signal Transduction', 'Negative regulation of the PI3K/AKT network', 'Semaphorin interactions', 'Sema4D in semaphorin signaling', 'Sema4D mediated inhibition of cell attachment and migration', 'Axon guidance', 'RAF/MAP kinase cascade', 'MAPK family signaling cascades', 'MAPK1/MAPK3 signaling', 'Signaling by MET', 'MET Receptor Activation'…	1
144	chr7	121372142	121372142	-	A	FAM3C				0.023166	0.0108359	1.09619	24	7	1012	639	2.16488	0.772364	0.0741454	(-0.07536691939193474, 1.6200954910374463)	0.917067	1	1	rs774605828	['Hemostasis', 'Platelet degranulation ', 'Platelet activation, signaling and aggregation', 'Response to elevated platelet cytosolic Ca2+']	-
149	chr7	133081944	133081944	G	T	CHCHD3				0.0125483	0.0201238	-0.681418	13	13	1023	633	0.618768	-0.480024	0.224832	(-1.2551484704855311, 0.2950997828706313)	0.917067	1	1	rs17338845	['Mitochondrial protein import', 'Mitochondrial biogenesis', 'Organelle biogenesis and maintenance', 'Cristae formation', 'Protein localization']	20
151	chr7	137251230	137251230	C	A	PTN	stopgain	PTN:NM_001321387:exon4:c.G451T:p.E151X	23.1	0.011583	0.0247678	-1.09646	12	16	1024	630	0.461426	-0.773434	0.0446695	(-1.528458378140058, -0.018409739191251773)	0.917067	1	1	rs61735090	['Signal Transduction', 'Signaling by ALK', 'Signaling by Receptor Tyrosine Kinases']	-
166	chr7	143813101	143813101	C	T	LOC154761;TCAF2P1				0.0289575	0.0139319	1.05555	30	9	1006	637	2.11067	0.747005	0.0513808	(-0.0044777450876584135, 1.4984879635644863)	0.917067	1	1	rs200681216	-	-
182	chr7	156681086	156681086	A	-	LMBR1				0.0366795	0.0216718	0.759155	38	14	998	632	1.71887	0.541665	0.0872497	(-0.07914770666332582, 1.1624776025563675)	0.917067	1	1		-	-
2	chr3	9928437	9928437	C	T	IL17RC	nonsynonymous SNV	IL17RC:NM_001367279:exon9:c.C890T:p.P297L,IL17RC:NM_001203265:exon10:c.C965T:p.P322L,IL17RC:NM_001367280:exon10:c.C965T:p.P322L,IL17RC:NM_032732:exon10:c.C965T:p.P322L,IL17RC:NM_001203263:exon11:c.C1010T:p.P337L,IL17RC:NM_001203264:exon11:c.C1010T:p.P337L,IL17RC:NM_001367278:exon11:c.C971T:p.P324L,IL17RC:NM_153460:exon11:c.C1010T:p.P337L,IL17RC:NM_153461:exon11:c.C1223T:p.P408L	13.14	0.0260618	0.0123839	1.07347	27	8	1009	638	2.13404	0.758019	0.0617057	(-0.03714610921538719, 1.5531832838467374)	0.917067	1	1	rs115419420	['Cytokine Signaling in Immune system', 'Immune System', 'Interleukin-17 signaling', 'Signaling by Interleukins']	-
5	chr3	15330431	15330431	G	T	SH3BP5				0.023166	0.0123839	0.903545	24	8	1012	638	1.8913	0.637267	0.121346	(-0.1689963490700619, 1.44352979340104)	0.917067	1	1	rs149825084	-	-
22	chr3	44901672	44901672	G	A	TGM4	stopgain	TGM4:NM_003241:exon7:c.G806A:p.W269X	34	0.0183398	0.0386997	-1.07735	19	25	1017	621	0.464071	-0.767718	0.0128514	(-1.3725351285716947, -0.1629011910619882)	0.917067	1	1	rs139860990	-	-
23	chr3	46459794	46459794	-	CTT	LTF	nonframeshift insertion	LTF:NM_001321121:exon2:c.68_69insAAG:p.R23_S24insR,LTF:NM_002343:exon2:c.68_69insAAG:p.R23_S24insR,LTF:NM_001321122:exon5:c.29_30insAAG:p.R10_S11insR		0.987452	0.972136	0.0225517	1023	628	13	18	2.25551	0.813377	0.0268746	(0.09311088545459567, 1.5336431143815141)	0.917067	1	1	rs10662431	['Innate Immune System', 'Immune System', 'Neutrophil degranulation', 'Metal sequestration by antimicrobial proteins', 'Antimicrobial peptides', 'Mtb iron assimilation by chelation', 'Latent infection - Other responses of Mtb to phagocytosis', 'Disease', 'Metabolism of proteins', 'Infectious disease', 'Infection with Mycobacterium tuberculosis', 'Amyloid fiber formation']	5
45	chr3	57556729	57556729	T	C	PDE12	nonsynonymous SNV	PDE12:NM_001322176:exon1:c.T350C:p.V117A,PDE12:NM_001322177:exon1:c.T350C:p.V117A,PDE12:NM_177966:exon1:c.T350C:p.V117A	0.001	0.015444	0.00464396	1.73362	16	3	1020	643	3.36209	1.21256	0.0547126	(-0.024496917155300668, 2.449623420217249)	0.917067	1	1	rs143228955	['Antiviral mechanism by IFN-stimulated genes', 'Cytokine Signaling in Immune system', 'Immune System', 'OAS antiviral response', 'Interferon Signaling']	-
51	chr3	69119477	69119477	C	T	LMOD3	nonsynonymous SNV	LMOD3:NM_198271:exon2:c.G878A:p.G293D,LMOD3:NM_001304418:exon3:c.G878A:p.G293D	24.6	0.00965251	0.0216718	-1.16684	10	14	1026	632	0.439989	-0.821006	0.0490343	(-1.6385376213327187, -0.0034741150774204588)	0.917067	1	1	rs111797345	-	-
55	chr3	91387966	91387966	A	G	EPHA3;NONE				0.01417	0.0329154	-1.21592	14	21	974	617	0.422313	-0.862007	0.0134732	(-1.5457372734223314, -0.17827750226829087)	0.917067	1	1		-	-
62	chr3	112534211	112534211	-	AA	ATG3	stopgain	ATG3:NM_001278712:exon11:c.920_921insTT:p.L307Ffs*2		0.0279923	0.0123839	1.17656	29	8	1007	638	2.29667	0.831462	0.038875	(0.04248620357619015, 1.6204371542895417)	0.917067	1	1	rs570214747	['Macroautophagy', 'Autophagy']	23
71	chr3	115816585	115816585	T	-	LSAMP				0.0212355	0.0123839	0.778014	22	8	1014	638	1.73028	0.548281	0.187448	(-0.26695124647647406, 1.3635132682207574)	0.917067	1	1	rs542438984	['Post-translational modification: synthesis of GPI-anchored proteins', 'Metabolism of proteins', 'Post-translational protein modification']	-
83	chr3	131349653	131349653	C	T	NEK11	nonsynonymous SNV	NEK11:NM_001353044:exon14:c.C1403T:p.A468V,NEK11:NM_001353045:exon14:c.C1403T:p.A468V,NEK11:NM_001353031:exon15:c.C1610T:p.A537V,NEK11:NM_001353036:exon15:c.C1526T:p.A509V,NEK11:NM_001146003:exon16:c.C1718T:p.A573V,NEK11:NM_001353029:exon16:c.C1718T:p.A573V,NEK11:NM_001353030:exon16:c.C1610T:p.A537V,NEK11:NM_001353026:exon17:c.C1844T:p.A615V,NEK11:NM_001353028:exon17:c.C1718T:p.A573V,NEK11:NM_001…	12.21	0.0144788	0.0278638	-0.944452	15	18	1021	628	0.512569	-0.668319	0.0585108	(-1.360699922916801, 0.02406150593595935)	0.917067	1	1	rs12637848	-	-
85	chr3	133928543	133928543	G	C	C3orf36				0.0289575	0.0170279	0.766041	30	11	1006	635	1.72149	0.54319	0.127169	(-0.15476457199349736, 1.241144086187081)	0.917067	1	1	rs149700585	-	-
93	chr3	147396245	147396245	C	G	ZIC4	nonsynonymous SNV	ZIC4:NM_001168378:exon3:c.G445C:p.G149R,ZIC4:NM_001168379:exon3:c.G409C:p.G137R,ZIC4:NM_032153:exon3:c.G295C:p.G99R	25.5	0.00868726	0.0201238	-1.21193	9	13	1027	633	0.42671	-0.851652	0.0510799	(-1.7073002760682288, 0.003997140248829356)	0.917067	1	1	rs34676558	-	-
98	chr3	151198540	151198540	T	C	GPR171	nonsynonymous SNV	GPR171:NM_013308:exon3:c.A847G:p.I283V	9.686	0.00772201	0.0170279	-1.14085	8	11	1028	635	0.449239	-0.800199	0.0868882	(-1.7162735479497004, 0.11587519146779479)	0.917067	1	1	rs3732756	-	-
106	chr3	170997894	170997894	-	T	SLC2A2				0.0241313	0.00928793	1.37748	25	6	1011	640	2.63765	0.969889	0.0339705	(0.07339423125219968, 1.8663843946945842)	0.917067	1	1	rs573575421	['Metabolism', 'Integration of energy metabolism', 'Cellular hexose transport', 'Transport of small molecules', 'Regulation of insulin secretion', 'SLC-mediated transmembrane transport', 'Intestinal absorption', 'Digestion and absorption', 'Intestinal hexose absorption', 'Developmental Biology', 'Disease', 'Regulation of beta-cell development', 'Regulation of gene expression in beta cells', 'Defe…	2
109	chr3	180619381	180619381	T	G	CCDC39				0.00579151	0.0139319	-1.26638	6	9	1030	637	0.412298	-0.88601	0.0942389	(-1.9237147008987123, 0.151695633379346)	0.917067	1	1	rs147028259	-	-
112	chr3	184971766	184971766	T	A	VPS8				0.00579151	0.0170279	-1.55589	6	11	1030	635	0.336275	-1.08982	0.0326124	(-2.0894477042967514, -0.09020206750585924)	0.917067	1	1	rs9831190	-	-
113	chr3	186743735	186743735	C	T	KNG1	stopgain	KNG1:NM_001166451:exon10:c.C1126T:p.R376X,KNG1:NM_000893:exon11:c.C1234T:p.R412X	18.83	0.0183398	0.0356037	-0.957052	19	23	1017	623	0.506049	-0.681121	0.0301548	(-1.2968688733277185, -0.0653733547199139)	0.917067	1	1	rs76438938	['Hemostasis', 'Platelet degranulation ', 'Intrinsic Pathway of Fibrin Clot Formation', 'Formation of Fibrin Clot (Clotting Cascade)', 'Signal Transduction', 'Signaling by GPCR', 'Class A/1 (Rhodopsin-like receptors)', 'Peptide ligand-binding receptors', 'Regulation of Insulin-like Growth Factor (IGF) transport and uptake by Insulin-like Growth Factor Binding Proteins (IGFBPs)', 'GPCR downstream …	7
116	chr3	192360695	192360695	-	T	FGF12				0.0250965	0.0123839	1.01902	26	8	1010	638	2.05297	0.719288	0.0775098	(-0.07930815324869844, 1.5178834929509621)	0.917067	1	1	rs766293650	['Muscle contraction', 'Cardiac conduction', 'Phase 0 - rapid depolarisation']	1
120	chr3	195895436	195895436	G	A	TNK2				0.011583	0.0247678	-1.09646	12	16	1024	630	0.461426	-0.773434	0.0446695	(-1.528458378140058, -0.018409739191251773)	0.917067	1	1	rs150628608	-	6
121	chr3	196223858	196223860	TTT	-	SLC51A				0.0572816	0.0232198	1.30271	59	15	971	631	2.55606	0.938467	0.00139412	(0.36292271614329874, 1.5140105579634957)	0.917067	1	1	rs771487894	-	-
11	chr14	23311013	23311013	A	G	BCL2L2				0.0260618	0.0108359	1.26611	27	7	1009	639	2.44273	0.893116	0.0365359	(0.05593340457529594, 1.7302988973705875)	0.917067	1	1	rs10149339	-	-
16	chr14	24177198	24177200	GAA	-	REC8	nonframeshift deletion	REC8:NM_001048205:exon8:c.682_684del:p.E230del,REC8:NM_005132:exon9:c.682_684del:p.E230del		0.0212355	0.00773994	1.45609	22	5	1014	641	2.78146	1.02298	0.0399581	(0.04692004422131524, 1.999031583166198)	0.917067	1	1		['Meiotic synapsis', 'Reproduction', 'Meiosis', 'Cell Cycle']	8
19	chr14	24334504	24334504	G	A	ADCY4	nonsynonymous SNV	ADCY4:NM_001198568:exon1:c.C149T:p.A50V,ADCY4:NM_001198592:exon2:c.C149T:p.A50V,ADCY4:NM_139247:exon2:c.C149T:p.A50V	23.1	0.015444	0.0325077	-1.07374	16	21	1020	625	0.466853	-0.76174	0.0232647	(-1.4197143309594422, -0.10376561309167154)	0.917067	1	1	rs77202343	['Opioid Signalling', 'PKA-mediated phosphorylation of CREB', 'Calmodulin induced events', 'Ca-dependent events', 'CaM pathway', 'G-protein mediated events', 'PLC beta mediated events', 'Neurotransmitter receptors and postsynaptic signal transmission', 'Transmission across Chemical Synapses', 'Neuronal System', 'DAG and IP3 signaling', 'Signal Transduction', 'PKA activation', 'Adenylate cyclase a…	7
25	chr14	35627156	35627156	G	A	RALGAPA1	nonsynonymous SNV	RALGAPA1:NM_001330075:exon33:c.C6650T:p.P2217L,RALGAPA1:NM_001346243:exon33:c.C5273T:p.P1758L,RALGAPA1:NM_001346246:exon33:c.C5273T:p.P1758L,RALGAPA1:NM_001346248:exon33:c.C6650T:p.P2217L,RALGAPA1:NM_014990:exon33:c.C5273T:p.P1758L,RALGAPA1:NM_194301:exon33:c.C5273T:p.P1758L,RALGAPA1:NM_001283043:exon34:c.C5312T:p.P1771L,RALGAPA1:NM_001283044:exon34:c.C5414T:p.P1805L,RALGAPA1:NM_001346245:exon34:…	27.5	0.0135659	0.0232198	-0.775373	14	15	1018	631	0.57852	-0.547282	0.144503	(-1.2823662801795215, 0.18780186806710863)	0.917067	1	1	rs140406088	['Signal Transduction', 'Signaling by Rho GTPases', 'RHO GTPase cycle', 'RHOH GTPase cycle', 'Signaling by Rho GTPases, Miro GTPases and RHOBTB3']	-
26	chr14	36477077	36477077	C	T	SFTA3			11.26	0.015444	0.0340557	-1.14085	16	22	1020	624	0.44492	-0.809861	0.0148556	(-1.4614940344533425, -0.15822850360150398)	0.917067	1	1	rs117932795	['Disease', 'Metabolism of proteins', 'Diseases of metabolism', 'Surfactant metabolism', 'Diseases associated with surfactant metabolism', 'Defective CSF2RB causes SMDP5', 'Defective CSF2RA causes SMDP4']	1
27	chr14	37545684	37545684	A	T	MIPOL1				0.0328185	0.0139319	1.23612	34	9	1002	637	2.40164	0.876152	0.020548	(0.13475014987656653, 1.617554492538023)	0.917067	1	1	rs17106826	-	-
29	chr14	45189385	45189385	A	T	FANCM				0.0106178	0.0216718	-1.02934	11	14	1025	632	0.48446	-0.724721	0.0743094	(-1.5206096591112228, 0.07116855062614469)	0.917067	1	1	rs147196731	['Fanconi Anemia Pathway', 'DNA Repair']	0
36	chr14	50476317	50476318	AA	-	MAP4K5				0.0203095	0.0108359	0.906332	21	7	1013	639	1.8924	0.637845	0.146559	(-0.22326467022395435, 1.4989551478178762)	0.917067	1	1	rs767158957	-	-
57	chr14	64743084	64743084	G	A	PLEKHG3	nonsynonymous SNV	PLEKHG3:NM_001308147:exon17:c.G3041A:p.R1014H	10.8	0.011583	0.0278638	-1.26638	12	18	1024	628	0.408854	-0.894397	0.0174056	(-1.6315563938510802, -0.15723710062775642)	0.917067	1	1	rs41309246	['Signal Transduction', 'Signaling by Rho GTPases', 'RHOA GTPase cycle', 'RHO GTPase cycle', 'RHOQ GTPase cycle', 'RHOG GTPase cycle', 'Signaling by Rho GTPases, Miro GTPases and RHOBTB3', 'CDC42 GTPase cycle', 'RAC1 GTPase cycle']	-
62	chr14	70010985	70010985	G	C	SMOC1				0.011583	0.0232198	-1.00335	12	15	1024	631	0.492969	-0.707309	0.070161	(-1.4728538354130611, 0.05823484666816181)	0.917067	1	1	rs78899069	-	-
76	chr14	96091037	96091037	G	A	C14orf132				0.0135135	0.0294118	-1.12199	14	19	1022	627	0.452055	-0.793952	0.0256742	(-1.4914168992415375, -0.09648686012228302)	0.917067	1	1	rs62618758	-	-
78	chr14	99737761	99737761	G	A	CYP46A1;EML1				0.0183398	0.00773994	1.24458	19	5	1017	641	2.39508	0.873418	0.0838032	(-0.11665458106642812, 1.8634908362753275)	0.917067	1	1	rs183347579	-	-
80	chr14	100143620	100143620	C	T	EVL				0.0357143	0.0170279	1.0686	37	11	999	635	2.13805	0.759893	0.0285999	(0.07949475155436792, 1.440290968625615)	0.917067	1	1	rs61984559	['Developmental Biology', 'Signal Transduction', 'Signaling by Rho GTPases', 'RHO GTPase Effectors', 'Signaling by ROBO receptors', 'Axon guidance', 'RHO GTPases Activate Formins', 'Nervous system development', 'Signaling by Rho GTPases, Miro GTPases and RHOBTB3', 'Adaptive Immune System', 'Immune System', 'TCR signaling', 'Generation of second messenger molecules']	4
84	chr14	102341820	102341820	G	A	ZNF839	nonsynonymous SNV	ZNF839:NM_001267827:exon8:c.G2077A:p.V693M,ZNF839:NM_001267828:exon8:c.G2077A:p.V693M,ZNF839:NM_018335:exon8:c.G2425A:p.V809M	1.189	0.0144788	0.00773994	0.903545	15	5	1021	641	1.88345	0.633104	0.222387	(-0.3838249696741256, 1.6500328245223548)	0.917067	1	1	rs28646161	['Generic Transcription Pathway', 'RNA Polymerase II Transcription', 'Gene expression (Transcription)']	-
85	chr14	102449828	102449828	C	T	TECPR2	nonsynonymous SNV	TECPR2:NM_001172631:exon14:c.C3275T:p.S1092L,TECPR2:NM_014844:exon14:c.C3275T:p.S1092L	28	0.00289575	0.0108359	-1.90381	3	7	1033	639	0.265109	-1.32762	0.0550094	(-2.6837119329829457, 0.02848018272433106)	0.917067	1	1	rs72700618	-	-
87	chr14	103706343	103706343	C	T	XRCC3			0.408	0.000965251	0.0108359	-3.48877	1	7	1035	639	0.0881988	-2.42816	0.0232789	(-4.525771010028684, -0.3305537907258116)	0.917067	1	1	rs572091526	['HDR through Homologous Recombination (HRR)', 'DNA Double-Strand Break Repair', 'Resolution of D-Loop Structures', 'Homology Directed Repair', 'HDR through Homologous Recombination (HRR) or Single Strand Annealing (SSA)', 'Resolution of D-loop Structures through Holliday Junction Intermediates', 'Homologous DNA Pairing and Strand Exchange', 'DNA Repair', 'Resolution of D-loop Structures through …	0
93	chr14	105493850	105493850	C	T	TEDC1	nonsynonymous SNV	TEDC1:NM_001134875:exon5:c.C601T:p.R201C,TEDC1:NM_001367178:exon5:c.C601T:p.R201C	15.86	0.015444	0.00773994	0.996654	16	5	1020	641	2.01098	0.698622	0.174775	(-0.31040786308733126, 1.7076525839834)	0.917067	1	1	rs118022421	-	-
0	chr2	45895	45895	A	G	FAM110C	nonsynonymous SNV	FAM110C:NM_001077710:exon1:c.T491C:p.I164T	0.248	0.993124	0.985804	0.0106721	1011	625	7	9	2.07977	0.732258	0.148267	(-0.26049302158765053, 1.7250090167176029)	0.917067	1	1	rs4241318	-	-
10	chr2	21003346	21003346	-	A	APOB				0.0337838	0.0170279	0.988433	35	11	1001	635	2.01844	0.702323	0.0443997	(0.017584621649971655, 1.3870613948870565)	0.917067	1	1	rs768542941	['Hemostasis', 'Metabolism', 'Innate Immune System', 'Immune System', 'Toll-like Receptor Cascades', 'Plasma lipoprotein assembly, remodeling, and clearance', 'Metabolism of vitamins and cofactors', 'Cell surface interactions at the vascular wall', 'Binding and Uptake of Ligands by Scavenger Receptors', 'Visual phototransduction', 'Cellular responses to stress', 'Scavenging by Class B Receptors',…	5
30	chr2	31197277	31197277	C	T	CAPN14	nonsynonymous SNV	CAPN14:NM_001145122:exon8:c.G847A:p.V283M,CAPN14:NM_001321270:exon8:c.G319A:p.V107M	23.8	0.0183398	0.0402477	-1.13393	19	26	1017	620	0.445503	-0.80855	0.00825227	(-1.4084701434394191, -0.20863081028950936)	0.917067	1	1	rs72797147	['Degradation of the extracellular matrix', 'Extracellular matrix organization']	-
32	chr2	36558524	36558524	-	A	FEZ2				0.0482625	0.0201238	1.262	50	13	986	633	2.46918	0.903888	0.00416652	(0.2855911305582852, 1.5221843004580142)	0.917067	1	1		-	-
34	chr2	38299191	38299191	-	T	ATL2				0.0610465	0.0247678	1.30144	63	16	969	630	2.55998	0.940001	0.000956617	(0.38221216496173915, 1.4977902583313878)	0.917067	1	1		-	-
36	chr2	38959867	38959867	G	C	ARHGEF33	nonsynonymous SNV	ARHGEF33:NM_001145451:exon14:c.G1562C:p.S521T,ARHGEF33:NM_001367623:exon14:c.G1562C:p.S521T	22.6	0.011583	0.0201238	-0.796895	12	13	1024	633	0.570613	-0.561044	0.164395	(-1.3518907770969593, 0.22980259483933274)	0.917067	1	1	rs201925961	['Signal Transduction', 'NRAGE signals death through JNK', 'p75 NTR receptor-mediated signalling', 'Cell death signalling via NRAGE, NRIF and NADE', 'Signaling by GPCR', 'GPCR downstream signalling', 'G alpha (12/13) signalling events', 'Death Receptor Signalling']	-
43	chr2	43832056	43832056	G	C	ABCG5	nonsynonymous SNV	ABCG5:NM_022436:exon3:c.C293G:p.A98G	32	0.00289575	0.0123839	-2.09646	3	8	1033	638	0.231607	-1.46271	0.0311916	(-2.7932804088672274, -0.13214646870592084)	0.917067	1	1	rs145164937	['ABC transporters in lipid homeostasis', 'Transport of small molecules', 'ABC-family proteins mediated transport', 'Signal Transduction', 'Disease', 'ABC transporter disorders', 'Disorders of transmembrane transporters', 'Defective ABCG8 causes GBD4 and sitosterolemia', 'Defective ABCG5 causes sitosterolemia', 'Signaling by Nuclear Receptors', 'NR1H2 and NR1H3-mediated signaling', 'NR1H3 & NR1H2…	-
44	chr2	46617235	46617237	CTG	-	CRIPT				0.0173745	0.00619195	1.48851	18	4	1018	642	2.83792	1.04307	0.0602184	(-0.044833996132077614, 2.130975002843612)	0.917067	1	1	rs758198081	-	-
47	chr2	48580986	48580986	G	T	STON1;STON1-GTF2A1L	nonsynonymous SNV	STON1-GTF2A1L:NM_001198594:exon1:c.G353T:p.G118V,STON1-GTF2A1L:NM_001198593:exon2:c.G353T:p.G118V,STON1:NM_006873:exon2:c.G353T:p.G118V,STON1-GTF2A1L:NM_172311:exon2:c.G353T:p.G118V,STON1:NM_001198595:exon3:c.G353T:p.G118V	14.25	0.00965251	0.0216718	-1.16684	10	14	1026	632	0.439989	-0.821006	0.0490343	(-1.6385376213327187, -0.0034741150774204588)	0.917067	1	1	rs72824125	-	-
61	chr2	74461772	74461772	C	T	MOGS	nonsynonymous SNV	MOGS:NM_006302:exon4:c.G2017A:p.V673I,MOGS:NM_001146158:exon5:c.G1699A:p.V567I	9.671	0.0106178	0.0216718	-1.02934	11	14	1025	632	0.48446	-0.724721	0.0743094	(-1.5206096591112228, 0.07116855062614469)	0.917067	1	1	rs114933392	['Disease', 'Diseases associated with N-glycosylation of proteins', 'Diseases of glycosylation', 'Metabolism of proteins', 'Asparagine N-linked glycosylation', 'Defective MOGS causes MOGS-CDG (CDG-2b)', 'N-glycan trimming in the ER and Calnexin/Calreticulin cycle', 'Infectious disease', 'Diseases of metabolism', 'Post-translational protein modification', 'SARS-CoV-1 Infection', 'SARS-CoV Infectio…	-
62	chr2	74889400	74889400	G	A	HK2	nonsynonymous SNV	HK2:NM_000189:exon17:c.G2531A:p.R844K	14.29	0.023166	0.0139319	0.73362	24	9	1012	637	1.67852	0.517915	0.188818	(-0.254558887474839, 1.2903890049477946)	0.917067	1	1	rs2229629	['Metabolism', 'Glycolysis', 'Glucose metabolism', 'Metabolism of carbohydrates', 'Glucose transport', 'Carbohydrate metabolism']	-
68	chr2	88448578	88448578	-	AGT	FOXI3	nonframeshift insertion	FOXI3:NM_001135649:exon2:c.891_892insACT:p.T297_A298insT		0.00579151	0.0154799	-1.41838	6	10	1030	636	0.370485	-0.992941	0.0556562	(-2.0098770393907155, 0.02399475609161561)	0.917067	1	1	rs540902681	-	-
72	chr2	95891707	95891707	T	A	ANKRD36C	nonsynonymous SNV	ANKRD36C:NM_001310154:exon67:c.A3910T:p.N1304Y	21.1	0.030888	0.0170279	0.85915	32	11	1004	635	1.83991	0.609718	0.0842737	(-0.08248454115411474, 1.3019211984388614)	0.917067	1	1	rs768682466	-	-
76	chr2	97545720	97545720	C	T	ANKRD36B	nonsynonymous SNV	ANKRD36B:NM_025190:exon24:c.G1627A:p.D543N	5.465	0.037464	0.0642202	-0.777523	26	28	668	408	0.567151	-0.567129	0.0424544	(-1.1149513888328064, -0.01930655373960466)	0.917067	1	1	rs202068566	-	-
78	chr2	98333423	98333423	-	A	VWA3B;CNGA3				0.0202703	0.00773994	1.38897	21	5	1015	641	2.65241	0.97547	0.0511405	(-0.00483393283116984, 1.9557741142993792)	0.917067	1	1	rs200747729	-	-
89	chr2	113062547	113062547	C	T	IL36RN	nonsynonymous SNV	IL36RN:NM_012275:exon5:c.C338T:p.S113L,IL36RN:NM_173170:exon5:c.C338T:p.S113L	27.8	0.00059453	0.00928793	-3.96553	0	6	1036	640	0.0514801	-2.96656	0.0439878	(-5.853232167703335, -0.07988962480408635)	0.917067	1	1	rs144478519	['Cytokine Signaling in Immune system', 'Immune System', 'Interleukin-1 family signaling', 'Signaling by Interleukins', 'Interleukin-36 pathway']	-
92	chr2	113596717	113596717	A	T	WASH2P				0.0260521	0.0510836	-0.97146	26	33	972	613	0.496882	-0.699402	0.00887081	(-1.2232100927713232, -0.17559369116712786)	0.917067	1	1		-	-
113	chr2	142130786	142130788	CGG	-	LRP1B				0.0135135	0.0232198	-0.780954	14	15	1022	631	0.576256	-0.551204	0.141643	(-1.2862778078261332, 0.18387024840735655)	0.917067	1	1	rs758255617	-	-
122	chr2	171448665	171448665	-	TT	DCAF17				0.0290135	0.0154799	0.906332	30	10	1004	636	1.9004	0.642064	0.0815664	(-0.08047412423137912, 1.3646012277444943)	0.917067	1	1	rs139655160	['Metabolism of proteins', 'Post-translational protein modification', 'Neddylation']	10
123	chr2	174337447	174337461	GGCGGCGGCAGCGGC	-	SP9	nonframeshift deletion	SP9:NM_001145250:exon2:c.1362_1376del:p.A466_A470del		0.0580271	0.0264798	1.13184	60	17	974	625	2.26477	0.817472	0.00344648	(0.2696734110951746, 1.365269717424326)	0.917067	1	1	rs778817750	-	2
129	chr2	178530827	178530827	G	A	TTN	nonsynonymous SNV	TTN:NM_003319:exon186:c.C78593T:p.A26198V,TTN:NM_133432:exon187:c.C78968T:p.A26323V,TTN:NM_133437:exon187:c.C79169T:p.A26390V,TTN:NM_133378:exon307:c.C98084T:p.A32695V,TTN:NM_001256850:exon308:c.C100865T:p.A33622V,TTN:NM_001267550:exon358:c.C105788T:p.A35263V	20.8	0.0212355	0.00773994	1.45609	22	5	1014	641	2.78146	1.02298	0.0399581	(0.04692004422131524, 1.999031583166198)	0.917067	1	1	rs66961115	['Hemostasis', 'Platelet degranulation ', 'Striated Muscle Contraction', 'Muscle contraction', 'Platelet activation, signaling and aggregation', 'Response to elevated platelet cytosolic Ca2+']	9
130	chr2	178534849	178534849	C	G	TTN	nonsynonymous SNV	TTN:NM_003319:exon186:c.G74571C:p.Q24857H,TTN:NM_133432:exon187:c.G74946C:p.Q24982H,TTN:NM_133437:exon187:c.G75147C:p.Q25049H,TTN:NM_133378:exon307:c.G94062C:p.Q31354H,TTN:NM_001256850:exon308:c.G96843C:p.Q32281H,TTN:NM_001267550:exon358:c.G101766C:p.Q33922H	14.52	0.0106178	0.0247678	-1.22199	11	16	1025	630	0.422561	-0.861422	0.0291698	(-1.6354757986878714, -0.08736724456881062)	0.917067	1	1	rs55886356	['Hemostasis', 'Platelet degranulation ', 'Striated Muscle Contraction', 'Muscle contraction', 'Platelet activation, signaling and aggregation', 'Response to elevated platelet cytosolic Ca2+']	9
133	chr2	181534771	181534771	T	-	ITGA4				0.0173745	0.00619195	1.48851	18	4	1018	642	2.83792	1.04307	0.0602184	(-0.044833996132077614, 2.130975002843612)	0.917067	1	1	rs749907239	['Adaptive Immune System', 'Extracellular matrix organization', 'Immune System', 'Immunoregulatory interactions between a Lymphoid and a non-Lymphoid cell', 'Integrin cell surface interactions', 'Hemostasis', 'Cell surface interactions at the vascular wall', 'Disease', 'Generic Transcription Pathway', 'Infectious disease', 'RNA Polymerase II Transcription', 'Gene expression (Transcription)', 'Tra…	6
136	chr2	186844678	186844678	-	A	ZSWIM2				0.0299228	0.0139319	1.10285	31	9	1005	637	2.1832	0.780789	0.0409653	(0.03205741468795331, 1.5295215097678732)	0.917067	1	1	rs199505226	-	-
137	chr2	190534533	190534535	CGC	-	NEMP2				0.00595238	0.0126582	-1.08854	6	8	1002	624	0.467066	-0.761285	0.160503	(-1.824494967158328, 0.301924995704004)	0.917067	1	1	rs761460717	-	0
142	chr2	202093125	202093125	T	C	KIAA2012	nonsynonymous SNV	KIAA2012:NM_001277372:exon4:c.T625C:p.Y209H,KIAA2012:NM_001367720:exon4:c.T625C:p.Y209H	26	0.0135135	0.00154799	3.12594	14	1	1022	645	8.83562	2.17879	0.0355154	(0.14764261603240092, 4.209939135262362)	0.917067	1	1	rs188532127	-	-
148	chr2	207852858	207852858	-	A	PLEKHM3				0.0261122	0.0108359	1.2689	27	7	1007	639	2.44758	0.8951	0.0361225	(0.057913016208560264, 1.7322875410074148)	0.917067	1	1	rs759958352	-	-
149	chr2	208240016	208240016	G	C	IDH1				0.0299228	0.0154799	0.95085	31	10	1005	636	1.96179	0.673858	0.0664767	(-0.04581310187803633, 1.3935288105541292)	0.917067	1	1	rs16840789	['Metabolism', 'Innate Immune System', 'Immune System', 'Metabolism of vitamins and cofactors', 'NADPH regeneration', 'Neutrophil degranulation', 'Metabolism of cofactors', 'Peroxisomal protein import', 'Protein localization', 'Disease', 'Abnormal conversion of 2-oxoglutarate to 2-hydroxyglutarate', 'Diseases of metabolism', 'The citric acid (TCA) cycle and respiratory electron transport', 'Citri…	-
151	chr2	210663104	210663105	TT	-	CPS1				0.0357143	0.0139319	1.35811	37	9	999	637	2.6214	0.963708	0.0101957	(0.22850224044612866, 1.6989141840170987)	0.917067	1	1	rs539132350	['Metabolism', 'Urea cycle', 'Metabolism of amino acids and derivatives', 'The citric acid (TCA) cycle and respiratory electron transport', 'Respiratory electron transport, ATP synthesis by chemiosmotic coupling, and heat production by uncoupling proteins.', 'Mitochondrial Uncoupling', 'Oleoyl-phe metabolism']	-
152	chr2	211387879	211387879	G	A	ERBB4				0.003861	0.0123839	-1.68142	4	8	1032	638	0.309109	-1.17406	0.0560322	(-2.3783429173710866, 0.030217230857760624)	0.917067	1	1	rs142532239	['Signaling by ERBB2', 'Signaling by ERBB4', 'SHC1 events in ERBB2 signaling', 'PI3K events in ERBB4 signaling', 'SHC1 events in ERBB4 signaling', 'Nuclear signaling by ERBB4', 'Downregulation of ERBB4 signaling', 'PIP3 activates AKT signaling', 'Signal Transduction', 'GRB2 events in ERBB2 signaling', 'PI3K events in ERBB2 signaling', 'Negative regulation of the PI3K/AKT network', 'RAF/MAP kinase…	3
154	chr2	215025648	215025648	T	0	ABCA12				0.0224609	0.0154799	0.537024	23	10	1001	636	1.46134	0.379353	0.320884	(-0.36967545137299174, 1.1283812652930032)	0.917067	1	1		['ABC transporters in lipid homeostasis', 'Transport of small molecules', 'ABC-family proteins mediated transport', 'Disease', 'ABC transporter disorders', 'Disorders of transmembrane transporters', 'Defective ABCA12 causes ARCI4B']	-
163	chr2	224886539	224886539	-	A	DOCK10				0.032882	0.0154799	1.0869	34	10	1000	636	2.1624	0.771219	0.0337675	(0.05917134856415096, 1.4832660833960514)	0.917067	1	1	rs761505400	['Hemostasis', 'Signal Transduction', 'Signaling by Rho GTPases', 'RHO GTPase cycle', 'CDC42 GTPase cycle', 'RAC1 GTPase cycle', 'RAC2 GTPase cycle', 'RAC3 GTPase cycle', 'Signaling by Rho GTPases, Miro GTPases and RHOBTB3', 'Factors involved in megakaryocyte development and platelet production']	-
164	chr2	225627054	225627054	A	C	NYAP2	nonsynonymous SNV	NYAP2:NM_020864:exon5:c.A1756C:p.T586P,NYAP2:NM_001371273:exon6:c.A1756C:p.T586P	9.532	0.96139	0.978328	-0.0251967	996	632	40	14	0.551582	-0.594964	0.0586539	(-1.211698831419255, 0.02177030929738033)	0.917067	1	1	rs3748993	-	-
169	chr2	230024850	230024853	TTTT	-	FBXO36;SLC16A14				0.0131894	0.0323129	-1.29273	11	19	823	569	0.400269	-0.915619	0.016753	(-1.6658357399150376, -0.1654032059225793)	0.917067	1	1		-	-
177	chr2	232379003	232379003	G	C	ALPP	nonsynonymous SNV	ALPP:NM_001632:exon2:c.G109C:p.E37Q	0.003	0.00482625	0.0108359	-1.16684	5	7	1031	639	0.442705	-0.814852	0.165591	(-1.9667243175543914, 0.33701978503311425)	0.917067	1	1	rs113323105	['Metabolism', 'Synthesis of PA', 'Glycerophospholipid biosynthesis', 'Phospholipid metabolism', 'Post-translational modification: synthesis of GPI-anchored proteins', 'Membrane Trafficking', 'Metabolism of proteins', 'Metabolism of lipids', 'Vesicle-mediated transport', 'Post-translational protein modification', 'Intra-Golgi traffic', 'Intra-Golgi and retrograde Golgi-to-ER traffic', 'Digestion'…	33
185	chr2	237986143	237986146	TTTT	-	UBE2F-SCLY				0.015534	0.00619195	1.32696	16	4	1014	642	2.53254	0.929224	0.0978185	(-0.17087909769752097, 2.029328059014967)	0.917067	1	1	rs755113723	-	-
187	chr2	238164165	238164165	G	T	ERFE	nonsynonymous SNV	ERFE:NM_001291832:exon5:c.G778T:p.A260S	9.904	0.019305	0.00928793	1.05555	20	6	1016	640	2.09974	0.741812	0.113106	(-0.1758473450758099, 1.6594720501582625)	0.917067	1	1	rs111241405	-	-
189	chr2	240011654	240011654	C	T	NDUFA10	nonsynonymous SNV	NDUFA10:NM_001322019:exon6:c.G712A:p.E238K,NDUFA10:NM_001322020:exon6:c.G712A:p.E238K,NDUFA10:NM_004544:exon6:c.G712A:p.E238K	34	0.00965251	0.0232198	-1.26638	10	15	1026	631	0.410006	-0.891582	0.0302087	(-1.697854644047076, -0.08530989854825632)	0.917067	1	1	rs35462421	['The citric acid (TCA) cycle and respiratory electron transport', 'Metabolism', 'Respiratory electron transport, ATP synthesis by chemiosmotic coupling, and heat production by uncoupling proteins.', 'Respiratory electron transport', 'Complex I biogenesis']	31
195	chr2	241071712	241071712	G	C	SNED1	nonsynonymous SNV	SNED1:NM_001080437:exon25:c.G3726C:p.Q1242H	22.4	0.0843023	0.0403727	1.06219	87	26	945	618	2.18828	0.783115	0.000641336	(0.33346624332129265, 1.232763977872805)	0.917067	1	1		-	-
9	chr1	1284098	1284098	G	-	SCNN1D				0.0125725	0.0341615	-1.4421	13	22	1021	622	0.359986	-1.02169	0.00385015	(-1.7145450795716264, -0.3288365630729051)	0.917067	1	1	rs764831670	['Stimuli-sensing channels', 'Transport of small molecules', 'Ion channel transport']	-
11	chr1	1291132	1291132	G	A	SCNN1D	nonsynonymous SNV	SCNN1D:NM_001130413:exon17:c.G2044A:p.V682M	6.237	0.0135135	0.0325077	-1.26638	14	21	1022	625	0.407697	-0.89723	0.0100906	(-1.5807663484119212, -0.21369410985890458)	0.917067	1	1	rs114257304	['Stimuli-sensing channels', 'Transport of small molecules', 'Ion channel transport']	-
22	chr1	5867883	5867883	G	A	NPHP4	nonsynonymous SNV	NPHP4:NM_001291594:exon20:c.C1793T:p.A598V,NPHP4:NM_001291593:exon21:c.C1790T:p.A597V,NPHP4:NM_015102:exon24:c.C3329T:p.A1110V	6.773	0.003861	0.0108359	-1.48877	4	7	1032	639	0.353821	-1.03897	0.0984744	(-2.271393189525819, 0.19346263032702615)	0.917067	1	1	rs139767853	['Signal Transduction', 'Organelle biogenesis and maintenance', 'Signaling by Hippo', 'Cilium Assembly', 'Anchoring of the basal body to the plasma membrane']	4
25	chr1	6213146	6213146	C	T	RNF207	nonsynonymous SNV	RNF207:NM_207396:exon16:c.C1615T:p.R539C	34	0.030888	0.0123839	1.31858	32	8	1004	638	2.54183	0.932885	0.0192368	(0.15181224246927272, 1.7139584459567407)	0.917067	1	1	rs55823245	-	-
27	chr1	6440773	6440773	C	G	ESPN	nonsynonymous SNV	ESPN:NM_001367473:exon4:c.C823G:p.P275A,ESPN:NM_001367474:exon4:c.C823G:p.P275A,ESPN:NM_031475:exon4:c.C823G:p.P275A	19.04	0.0135135	0.0263158	-0.961526	14	17	1022	629	0.506849	-0.679542	0.0622387	(-1.3938412522784875, 0.03475819527015522)	0.917067	1	1	rs3817921	['Sensory processing of sound', 'Sensory processing of sound by inner hair cells of the cochlea', 'Sensory processing of sound by outer hair cells of the cochlea', 'Sensory Perception']	-
28	chr1	6441092	6441092	C	T	ESPN				0.0318533	0.0185759	0.778014	33	12	1003	634	1.73829	0.552899	0.104826	(-0.11524646263047023, 1.2210446189380098)	0.917067	1	1	rs55884073	['Sensory processing of sound', 'Sensory processing of sound by inner hair cells of the cochlea', 'Sensory processing of sound by outer hair cells of the cochlea', 'Sensory Perception']	-
30	chr1	9539627	9539627	G	T	SLC25A33				0.0155925	0.0320513	-1.03953	15	20	947	604	0.478353	-0.737407	0.0328226	(-1.4145972493934775, -0.06021668601261121)	0.917067	1	1	rs554258511	-	-
31	chr1	9997247	9997247	C	G	RBP7				0.0202703	0.0108359	0.903545	21	7	1015	639	1.88867	0.635873	0.14781	(-0.2252327187153944, 1.4969784218549074)	0.917067	1	1	rs111277407	-	-
34	chr1	10665530	10665530	C	T	CASZ1	nonsynonymous SNV	CASZ1:NM_001079843:exon5:c.G58A:p.A20T,CASZ1:NM_017766:exon5:c.G58A:p.A20T	10.4	0.0125483	0.0263158	-1.06844	13	17	1023	629	0.470186	-0.754627	0.0424499	(-1.4835495340113032, -0.02570545768042498)	0.917067	1	1	rs76910492	-	-
40	chr1	12895021	12895021	C	T	PRAMEF10	nonsynonymous SNV	PRAMEF10:NM_001039361:exon3:c.G431A:p.R144H		0.027027	0.0124224	1.12146	28	8	1008	636	2.20833	0.792238	0.0499247	(0.00026061438750479837, 1.5842155520208467)	0.917067	1	1	rs2797709	-	-
51	chr1	15381279	15381279	A	G	FHAD1	nonsynonymous SNV	FHAD1:NM_052929:exon29:c.A3784G:p.M1262V	18.25	0.0241313	0.0170279	0.503007	25	11	1011	635	1.42748	0.35591	0.329962	(-0.36014210047091344, 1.0719627643550136)	0.917067	1	1	rs113966492	-	-
54	chr1	16006170	16006170	C	T	SRARP	nonsynonymous SNV	SRARP:NM_178840:exon2:c.C334T:p.L112F	10.73	0.00965251	0.0216718	-1.16684	10	14	1026	632	0.439989	-0.821006	0.0490343	(-1.6385376213327187, -0.0034741150774204588)	0.917067	1	1	rs34950166	-	-
55	chr1	16055543	16055543	A	T	CLCNKB				0.0173745	0.0417957	-1.26638	18	27	1018	619	0.40537	-0.902955	0.00342644	(-1.507661637087365, -0.2982484279807076)	0.917067	1	1		['Stimuli-sensing channels', 'Transport of small molecules', 'Ion channel transport']	-
72	chr1	21839470	21839470	T	C	HSPG2	nonsynonymous SNV	HSPG2:NM_001291860:exon73:c.A9793G:p.I3265V,HSPG2:NM_005529:exon73:c.A9790G:p.I3264V	0.005	0.015444	0.00928793	0.73362	16	6	1020	640	1.6732	0.51474	0.284917	(-0.4287130345869672, 1.458192080761223)	0.917067	1	1	rs139500146	['Metabolism', 'Degradation of the extracellular matrix', 'Extracellular matrix organization', 'Glycosaminoglycan metabolism', 'Heparan sulfate/heparin (HS-GAG) metabolism', 'Chondroitin sulfate/dermatan sulfate metabolism', 'A tetrasaccharide linker sequence is required for GAG synthesis', 'HS-GAG biosynthesis', 'HS-GAG degradation', 'Integrin cell surface interactions', 'Laminin interactions', …	5
88	chr1	28236497	28236497	G	T	ATP5IF1				0.0376448	0.0820433	-1.12394	39	53	997	593	0.437672	-0.826287	0.000142746	(-1.252092140031938, -0.4004811367412382)	0.917067	1	1	rs2232720	-	-
97	chr1	32772288	32772288	G	C	KIAA1522	nonsynonymous SNV	KIAA1522:NM_001198972:exon6:c.G2932C:p.A978P,KIAA1522:NM_001369553:exon6:c.G2965C:p.A989P,KIAA1522:NM_020888:exon6:c.G3109C:p.A1037P	0.006	0.0125483	0.0232198	-0.887869	13	15	1023	631	0.534572	-0.62629	0.101375	(-1.3755807914063238, 0.12300129730415155)	0.917067	1	1		-	2
101	chr1	35414092	35414092	-	T	ZMYM4				0.015534	0.00309598	2.32696	16	2	1014	644	5.08087	1.62548	0.0305847	(0.15219528000759874, 3.0987688872585237)	0.917067	1	1	rs552172550	-	-
116	chr1	46815158	46815158	A	G	CYP4B1	nonsynonymous SNV	CYP4B1:NM_001319162:exon6:c.A478G:p.S160G,CYP4B1:NM_001319163:exon6:c.A475G:p.S159G,CYP4B1:NM_001319161:exon7:c.A922G:p.S308G,CYP4B1:NM_000779:exon8:c.A964G:p.S322G,CYP4B1:NM_001099772:exon8:c.A967G:p.S323G	24.8	0.0125483	0.0216718	-0.788333	13	14	1023	632	0.573663	-0.555713	0.152572	(-1.317106867350938, 0.20568017943395878)	0.917067	1	1	rs45467195	['Metabolism', 'Biological oxidations', 'Cytochrome P450 - arranged by substrate type', 'Fatty acids', 'Phase I - Functionalization of compounds', 'Eicosanoids', 'Synthesis of Leukotrienes (LT) and Eoxins (EX)', 'Arachidonic acid metabolism', 'Metabolism of lipids', 'Fatty acid metabolism', 'Miscellaneous substrates']	-
117	chr1	47219895	47219895	C	G	TAL1	nonsynonymous SNV	TAL1:NM_001290406:exon3:c.G344C:p.G115A,TAL1:NM_001287347:exon5:c.G821C:p.G274A,TAL1:NM_001290403:exon5:c.G821C:p.G274A,TAL1:NM_001290405:exon5:c.G821C:p.G274A,TAL1:NM_001290404:exon6:c.G821C:p.G274A,TAL1:NM_003189:exon6:c.G821C:p.G274A	13.62	0.00772201	0.0154799	-1.00335	8	10	1028	636	0.494942	-0.703315	0.140373	(-1.6382513098090605, 0.23162044183066577)	0.917067	1	1		['Generic Transcription Pathway', 'RNA Polymerase II Transcription', 'Gene expression (Transcription)', 'Transcriptional regulation by RUNX1', 'RUNX1 regulates transcription of genes involved in differentiation of HSCs', 'Metabolism', 'Integration of energy metabolism', 'Insulin effects increased synthesis of Xylulose-5-Phosphate', 'Pentose phosphate pathway', 'Metabolism of carbohydrates', 'Deve…	1
123	chr1	50715032	50715032	C	A	FAF1				0.00482625	0.0108359	-1.16684	5	7	1031	639	0.442705	-0.814852	0.165591	(-1.9667243175543914, 0.33701978503311425)	0.917067	1	1	rs77935192	-	3
143	chr1	75241993	75241993	C	T	SLC44A5				0.011583	0.0278638	-1.26638	12	18	1024	628	0.408854	-0.894397	0.0174056	(-1.6315563938510802, -0.15723710062775642)	0.917067	1	1	rs141693552	['Metabolism', 'Synthesis of PC', 'Glycerophospholipid biosynthesis', 'Phospholipid metabolism', 'Transport of small molecules', 'Transport of bile salts and organic acids, metal ions and amine compounds', 'SLC-mediated transmembrane transport', 'Metabolism of lipids']	-
146	chr1	85072972	85072972	-	AAG	WDR63				0.0202703	0.00928793	1.12594	21	6	1015	640	2.2069	0.791587	0.0891407	(-0.12107737023846987, 1.7042518769848662)	0.917067	1	1	rs375737203	-	-
147	chr1	85097661	85097661	C	A	WDR63				0.00675676	0.0170279	-1.33349	7	11	1029	635	0.392703	-0.934703	0.0545075	(-1.8874809556595764, 0.018075234290746423)	0.917067	1	1	rs192462237	-	-
150	chr1	86473447	86473447	C	T	CLCA1	nonsynonymous SNV	CLCA1:NM_001285:exon2:c.C193T:p.L65F	9.915	0.973938	0.958204	0.0234969	1009	619	27	27	1.63005	0.48861	0.0776495	(-0.054129241319222254, 1.031348736657247)	0.917067	1	1	rs2145412	['Stimuli-sensing channels', 'Transport of small molecules', 'Ion channel transport']	-
153	chr1	93846977	93846977	-	C	BCAR3				0.974138	0.982533	-0.0123794	678	450	18	8	0.66963	-0.401031	0.350167	(-1.2423385254668922, 0.44027750338629335)	0.917067	1	1	rs202198870	-	1
155	chr1	100196432	100196435	AAAA	-	DBT				0.0562347	0.0273973	1.03743	46	16	772	568	2.11528	0.74919	0.0112225	(0.1701038279507212, 1.3282752579406572)	0.917067	1	1		['Metabolism', 'Signal Transduction', 'Signaling by Rho GTPases', 'Glyoxylate metabolism and glycine degradation', 'Branched-chain amino acid catabolism', 'Metabolism of amino acids and derivatives', 'RHO GTPase cycle', 'RHOH GTPase cycle', 'Signaling by Rho GTPases, Miro GTPases and RHOBTB3']	22
156	chr1	103031249	103031249	-	AAA	COL11A1				0.0164093	0.0371517	-1.17892	17	24	1019	622	0.432368	-0.838477	0.00901211	(-1.4677426816103372, -0.20921217194021335)	0.917067	1	1	rs546786215	['Collagen degradation', 'Degradation of the extracellular matrix', 'Extracellular matrix organization', 'Collagen formation', 'Collagen biosynthesis and modifying enzymes', 'Assembly of collagen fibrils and other multimeric structures', 'Collagen chain trimerization', 'Non-integrin membrane-ECM interactions', 'Signal Transduction', 'Signaling by MET', 'MET activates PTK2 signaling', 'MET promote…	6
163	chr1	117017104	117017104	A	G	CD101	nonsynonymous SNV	CD101:NM_001256106:exon5:c.A1243G:p.M415V,CD101:NM_001256109:exon5:c.A1243G:p.M415V,CD101:NM_001256111:exon5:c.A1057G:p.M353V,CD101:NM_004258:exon5:c.A1243G:p.M415V	0.001	0.971042	0.987616	-0.024416	1006	638	30	8	0.420481	-0.866357	0.0307834	(-1.6525314497010726, -0.08018209563377798)	0.917067	1	1	rs2249265	['Adaptive Immune System', 'Immune System', 'TCR signaling', 'Generation of second messenger molecules']	1
165	chr1	117522919	117522919	G	A	MAN1A2	nonsynonymous SNV	MAN1A2:NM_006699:exon13:c.G1888A:p.A630T	15.31	0.0337838	0.0201238	0.747425	35	13	1001	633	1.70253	0.532114	0.105528	(-0.11221404394329326, 1.1764427376569575)	0.917067	1	1	rs41296190	['Metabolism of proteins', 'Asparagine N-linked glycosylation', 'Post-translational protein modification', 'Transport to the Golgi and subsequent modification', 'N-glycan trimming and elongation in the cis-Golgi', 'Progressive trimming of alpha-1,2-linked mannose residues from Man9/8/7GlcNAc2 to produce Man5GlcNAc2', 'Membrane Trafficking', 'Vesicle-mediated transport', 'Intra-Golgi traffic', 'In…	-
175	chr1	120913869	120913869	T	C	LOC100996720				0.0914286	0.195122	-1.09366	32	48	318	198	0.415094	-0.879249	0.000341994	(-1.3604535194080667, -0.398045400979546)	0.917067	1	1		-	-
178	chr1	145215294	145215294	G	C	LOC100996740				0.0337838	0.0154799	1.12594	35	10	1001	636	2.22378	0.799207	0.0273195	(0.08943249321894753, 1.5089810118215916)	0.917067	1	1		-	-
180	chr1	145377990	145377990	G	A	NBPF20				0.007	0.0159744	-1.19034	7	10	993	616	0.43424	-0.834159	0.0922628	(-1.8052561609939892, 0.1369388720932173)	0.917067	1	1		-	-
181	chr1	145575666	145575666	G	-	NBPF25P				0.00675676	0.0170279	-1.33349	7	11	1029	635	0.392703	-0.934703	0.0545075	(-1.8874809556595764, 0.018075234290746423)	0.917067	1	1		-	-
191	chr1	147647455	147647455	T	A	ACP6	nonsynonymous SNV	ACP6:NM_016361:exon10:c.A1255T:p.T419S	7.694	0.027027	0.0139319	0.956012	28	9	1008	637	1.96605	0.676026	0.0802793	(-0.08151279280932311, 1.4335650723689888)	0.917067	1	1	rs137987097	['Metabolism', 'Synthesis of PA', 'Glycerophospholipid biosynthesis', 'Phospholipid metabolism', 'Metabolism of lipids']	-
202	chr1	150509691	150509691	T	A	ECM1	nonsynonymous SNV	ECM1:NM_001202858:exon3:c.T152A:p.L51Q,ECM1:NM_004425:exon3:c.T152A:p.L51Q,ECM1:NM_022664:exon3:c.T152A:p.L51Q	1.154	0.0279923	0.0123839	1.17656	29	8	1007	638	2.29667	0.831462	0.038875	(0.04248620357619015, 1.6204371542895417)	0.917067	1	1		['Hemostasis', 'Platelet degranulation ', 'Platelet activation, signaling and aggregation', 'Response to elevated platelet cytosolic Ca2+']	2
205	chr1	150988117	150988117	G	A	ANXA9	nonsynonymous SNV	ANXA9:NM_003568:exon11:c.G724A:p.G242R	23.2	0.0106178	0.0185759	-0.806949	11	12	1025	634	0.566992	-0.56741	0.177187	(-1.3915170702928883, 0.2566964420430624)	0.917067	1	1	rs149528939	-	-
207	chr1	151343848	151343848	C	T	RFX5	nonsynonymous SNV	RFX5:NM_000449:exon9:c.G590A:p.R197Q,RFX5:NM_001025603:exon9:c.G590A:p.R197Q	26.7	0.0135135	0.0325077	-1.26638	14	21	1022	625	0.407697	-0.89723	0.0100906	(-1.5807663484119212, -0.21369410985890458)	0.917067	1	1	rs2233851	-	2
220	chr1	153934833	153934833	C	0	DENND4B				0.0164093	0.00619195	1.40604	17	4	1019	642	2.67763	0.98493	0.0775449	(-0.10872704384579412, 2.0785875506529172)	0.917067	1	1		['Membrane Trafficking', 'Vesicle-mediated transport', 'RAB GEFs exchange GTP for GDP on RABs', 'Rab regulation of trafficking']	11
226	chr1	155709793	155709793	G	A	DAP3	nonsynonymous SNV	DAP3:NM_001199850:exon2:c.G14A:p.G5E,DAP3:NM_001199851:exon2:c.G14A:p.G5E,DAP3:NM_004632:exon2:c.G14A:p.G5E,DAP3:NM_033657:exon2:c.G14A:p.G5E,DAP3:NM_001199849:exon3:c.G14A:p.G5E	11.14	0.00579151	0.0154799	-1.41838	6	10	1030	636	0.370485	-0.992941	0.0556562	(-2.0098770393907155, 0.02399475609161561)	0.917067	1	1	rs61755343	['Metabolism of proteins', 'Mitochondrial translation', 'Mitochondrial translation elongation', 'Mitochondrial translation termination', 'Translation', 'Mitochondrial translation initiation']	17
227	chr1	155736985	155736985	G	A	DAP3	nonsynonymous SNV	DAP3:NM_001199850:exon11:c.G931A:p.V311I,DAP3:NM_001199851:exon11:c.G910A:p.V304I,DAP3:NM_004632:exon12:c.G1033A:p.V345I,DAP3:NM_033657:exon12:c.G1033A:p.V345I,DAP3:NM_001199849:exon13:c.G1033A:p.V345I	24.6	0.00772201	0.0185759	-1.26638	8	12	1028	634	0.411154	-0.888787	0.0529382	(-1.7888420601649737, 0.011268860792876811)	0.917067	1	1	rs41264967	['Metabolism of proteins', 'Mitochondrial translation', 'Mitochondrial translation elongation', 'Mitochondrial translation termination', 'Translation', 'Mitochondrial translation initiation']	17
241	chr1	160681129	160681129	C	-	CD48	frameshift deletion	CD48:NM_001256030:exon3:c.725delG:p.G242Vfs*57		0.019305	0.00928793	1.05555	20	6	1016	640	2.09974	0.741812	0.113106	(-0.1758473450758099, 1.6594720501582625)	0.917067	1	1	rs142100077	['Hemostasis', 'Cell surface interactions at the vascular wall', 'Adaptive Immune System', 'Immune System', 'Immunoregulatory interactions between a Lymphoid and a non-Lymphoid cell']	1
244	chr1	162287456	162287456	A	G	NOS1AP				0.0279923	0.0154799	0.854635	29	10	1007	636	1.83158	0.605178	0.102105	(-0.1204005091545357, 1.3307573243825115)	0.917067	1	1	rs7538260	-	-
248	chr1	167021122	167021122	A	G	MAEL	nonsynonymous SNV	MAEL:NM_001286377:exon10:c.A986G:p.N329S,MAEL:NM_032858:exon11:c.A1079G:p.N360S,MAEL:NM_001286378:exon12:c.A911G:p.N304S	0.022	0.011583	0.0278638	-1.26638	12	18	1024	628	0.408854	-0.894397	0.0174056	(-1.6315563938510802, -0.15723710062775642)	0.917067	1	1	rs34554682	['Gene Silencing by RNA', 'PIWI-interacting RNA (piRNA) biogenesis', 'Gene expression (Transcription)']	-
254	chr1	169376630	169376630	A	G	BLZF1	nonsynonymous SNV	BLZF1:NM_001320972:exon3:c.A119G:p.Q40R,BLZF1:NM_001320973:exon3:c.A119G:p.Q40R,BLZF1:NM_003666:exon3:c.A119G:p.Q40R	9.6	0.030888	0.0201238	0.618142	32	13	1004	633	1.55195	0.43951	0.186607	(-0.21274582721654445, 1.0917651616779271)	0.917067	1	1	rs1028180	['Golgi Cisternae Pericentriolar Stack Reorganization', 'Cell Cycle', 'Mitotic Prophase', 'M Phase', 'Cell Cycle, Mitotic']	11
260	chr1	175942120	175942120	C	G	LINC01657;COP1				0.0212355	0.0139319	0.608089	22	9	1014	637	1.53561	0.428929	0.28225	(-0.3529015108368565, 1.2107602057231173)	0.917067	1	1	rs139905798	-	-
263	chr1	182600491	182600491	T	C	RGS16	nonsynonymous SNV	RGS16:NM_002928:exon5:c.A410G:p.H137R	0.299	0.97973	0.989164	-0.013826	1015	639	21	7	0.529473	-0.635873	0.14781	(-1.4969784218549074, 0.2252327187153944)	0.917067	1	1	rs1144566	['Signal Transduction', 'Signaling by GPCR', 'GPCR downstream signalling', 'G alpha (q) signalling events', 'G alpha (i) signalling events', 'G alpha (z) signalling events']	-
266	chr1	184619576	184619576	A	C	C1orf21				0.0328185	0.0154799	1.08412	34	10	1002	636	2.15808	0.769221	0.0342298	(0.05717873010189545, 1.4812626965329607)	0.917067	1	1	rs16823344	-	-
268	chr1	186007112	186007112	G	A	HMCN1				0.011583	0.0247678	-1.09646	12	16	1024	630	0.461426	-0.773434	0.0446695	(-1.528458378140058, -0.018409739191251773)	0.917067	1	1	rs1884662	-	-
271	chr1	186401149	186401149	C	G	OCLM	nonsynonymous SNV	OCLM:NM_022375:exon1:c.C104G:p.S35C	9.763	0.0222008	0.0108359	1.03479	23	7	1013	639	2.07263	0.728817	0.0935547	(-0.12300668167597473, 1.5806407156813498)	0.917067	1	1	rs180959681	-	-
278	chr1	201061931	201061931	A	G	CACNA1S				0.0299228	0.0185759	0.687816	31	12	1005	634	1.62968	0.488387	0.155386	(-0.18534992552182217, 1.162123302804213)	0.917067	1	1	rs41267501	['Developmental Biology', 'NCAM signaling for neurite out-growth', 'NCAM1 interactions', 'Axon guidance', 'Nervous system development']	8
282	chr1	203186284	203186284	G	A	CHI3L1				0.0511583	0.0263158	0.95904	53	17	983	629	1.99491	0.690601	0.0148056	(0.13520565587318423, 1.2459957562251764)	0.917067	1	1	rs111768615	['Innate Immune System', 'Immune System', 'Neutrophil degranulation']	1
283	chr1	205303790	205303790	G	A	NUAK2	nonsynonymous SNV	NUAK2:NM_030952:exon7:c.C1547T:p.A516V	12.67	0.015444	0.0340557	-1.14085	16	22	1020	624	0.44492	-0.809861	0.0148556	(-1.4614940344533425, -0.15822850360150398)	0.917067	1	1	rs35070935	-	-
290	chr1	207867582	207867582	G	A	MIR29B2CHG;CD34				0.0472973	0.0216718	1.12594	49	14	987	632	2.24113	0.806982	0.00863806	(0.2046889165339134, 1.4092757298835743)	0.917067	1	1	rs78477968	-	-
296	chr1	215878724	215878724	G	T	USH2A				0.027027	0.0154799	0.804009	28	10	1008	636	1.76667	0.569095	0.125916	(-0.15973455685163196, 1.297923620631564)	0.917067	1	1	rs55713064	-	-
314	chr1	236221873	236221873	G	A	ERO1B				0.027027	0.0139319	0.956012	28	9	1008	637	1.96605	0.676026	0.0802793	(-0.08151279280932311, 1.4335650723689888)	0.917067	1	1	rs41305554	['Insulin processing', 'Peptide hormone metabolism', 'Metabolism of proteins']	-
319	chr1	237742271	237742272	TT	-	RYR2				0.0270793	0.0154799	0.806797	28	10	1006	636	1.77018	0.571081	0.124603	(-0.15775365657059026, 1.2999149162937815)	0.917067	1	1	rs397516500	['Stimuli-sensing channels', 'Transport of small molecules', 'Muscle contraction', 'Cardiac conduction', 'Ion homeostasis', 'Ion channel transport']	8
321	chr1	240207788	240207887	TCCCGGAGCGGGCATACCCCCTCCGCCCCCACTTCCCGGAGCGGGCATACCCCCTCCTCCCCCTCTTCCCGGAGCGGGCATACCTCCTCCACCCCCTCTA	0	FMN2				0.011583	0.0263975	-1.18839	12	17	1024	627	0.432215	-0.838832	0.0274578	(-1.5844645011249165, -0.09319941734457848)	0.917067	1	1		-	-
322	chr1	240207788	240207788	-	CCCGGAGCAGGAATACCTCCTCCACCCCCTCTA	FMN2	nonframeshift insertion	FMN2:NM_020066:exon5:c.2976_2977insCCCGGAGCAGGAATACCTCCTCCACCCCCTCTA:p.G1104_V1105insAGIPPPPPLPG,FMN2:NM_001305424:exon6:c.2988_2989insCCCGGAGCAGGAATACCTCCTCCACCCCCTCTA:p.G1108_V1109insAGIPPPPPLPG		0.0106178	0.0263975	-1.31392	11	17	1025	627	0.395811	-0.926819	0.0175549	(-1.691715616698335, -0.161923227696532)	0.917067	1	1	rs746761716	-	-
323	chr1	240930672	240930672	C	G	RGS7				0.027027	0.0139319	0.956012	28	9	1008	637	1.96605	0.676026	0.0802793	(-0.08151279280932311, 1.4335650723689888)	0.917067	1	1	rs3912109	['Signal Transduction', 'Signaling by GPCR', 'GPCR downstream signalling', 'Chaperonin-mediated protein folding', 'Protein folding', 'Metabolism of proteins', 'G alpha (i) signalling events', 'Cooperation of PDCL (PhLP1) and TRiC/CCT in G-protein beta folding']	-
324	chr1	241505956	241505956	C	T	FH				0.0106178	0.0216718	-1.02934	11	14	1025	632	0.48446	-0.724721	0.0743094	(-1.5206096591112228, 0.07116855062614469)	0.917067	1	1	rs145209119	['The citric acid (TCA) cycle and respiratory electron transport', 'Metabolism', 'Citric acid cycle (TCA cycle)', 'Pyruvate metabolism and Citric Acid (TCA) cycle']	-
326	chr1	244432661	244432661	T	A	ADSS2				0.0193798	0.0433437	-1.16126	20	28	1012	618	0.436194	-0.829668	0.00524272	(-1.4121448900490976, -0.24719036797276994)	0.917067	1	1		['Metabolism', 'Metabolism of nucleotides', 'Purine ribonucleoside monophosphate biosynthesis', 'Nucleobase biosynthesis', 'Nucleotide metabolism', 'Purine metabolism', 'De novo synthesis of AMP']	-
9	chr9	2646293	2646293	G	C	VLDLR				0.0241313	0.0108359	1.15508	25	7	1011	639	2.25731	0.814175	0.0586486	(-0.029773854771545927, 1.6581236771114463)	0.917067	1	1	rs41271163	['Developmental Biology', 'Plasma lipoprotein assembly, remodeling, and clearance', 'Transport of small molecules', 'Axon guidance', 'Reelin signalling pathway', 'VLDLR internalisation and degradation', 'Plasma lipoprotein clearance', 'Nervous system development', 'VLDL clearance']	5
13	chr9	14797518	14797518	A	T	FREM1	nonsynonymous SNV	FREM1:NM_144966:exon22:c.T3819A:p.D1273E	26.5	0.0106383	0.0216718	-1.02655	11	14	1023	632	0.485407	-0.722767	0.075095	(-1.518661136510399, 0.07312627926708681)	0.917067	1	1	rs7025814	-	-
34	chr9	38068165	38068165	G	C	SHB	nonsynonymous SNV	SHB:NM_003028:exon1:c.C481G:p.L161V	23.2	0.0183398	0.0108359	0.759155	19	7	1017	639	1.70544	0.533821	0.23031	(-0.3383894032973541, 1.406031180177557)	0.917067	1	1	rs199974314	['Signal Transduction', 'Signaling by VEGF', 'VEGFA-VEGFR2 Pathway', 'Signaling by Receptor Tyrosine Kinases']	1
43	chr9	42185809	42185809	A	C	SPATA31A6				0.0570652	0.119658	-1.06823	42	56	694	412	0.445245	-0.809131	0.000149551	(-1.227365015807547, -0.39089635141057155)	0.917067	1	1	rs2259626	-	-
50	chr9	62897666	62897666	G	A	LERFS;LOC728673				0.0287234	0.0648464	-1.1748	27	38	913	548	0.426471	-0.85221	0.000931678	(-1.3567738059824905, -0.3476459687555268)	0.917067	1	1	rs17852432	-	-
51	chr9	64408021	64408021	C	A	ANKRD20A4-ANKRD20A20P				0.00772201	0.0201238	-1.38186	8	13	1028	633	0.378928	-0.970408	0.0318715	(-1.8566835687118217, -0.08413211059344783)	0.917067	1	1	rs376917476	-	-
58	chr9	70843129	70843129	-	AA	TRPM3				0.0492278	0.0216718	1.18365	51	14	985	632	2.33735	0.849016	0.00552708	(0.2492737334489068, 1.4487583787187652)	0.917067	1	1		['Stimuli-sensing channels', 'TRP channels', 'Transport of small molecules', 'Ion channel transport']	-
69	chr9	83739749	83739750	AA	-	GKAP1				0.0318533	0.0154799	1.04105	33	10	1003	636	2.09252	0.73837	0.0428043	(0.023930796712524516, 1.4528096909887172)	0.917067	1	1	rs779424988	-	4
76	chr9	87888077	87888077	C	T	SPATA31E1	nonsynonymous SNV	SPATA31E1:NM_178828:exon4:c.C3590T:p.T1197M	3.487	0.0212355	0.0123839	0.778014	22	8	1014	638	1.73028	0.548281	0.187448	(-0.26695124647647406, 1.3635132682207574)	0.917067	1	1	rs35095477	-	-
77	chr9	87888398	87888398	C	G	SPATA31E1	nonsynonymous SNV	SPATA31E1:NM_178828:exon4:c.C3911G:p.P1304R	0.002	0.0125483	0.0247678	-0.980978	13	16	1023	630	0.500367	-0.692414	0.066128	(-1.4309538526346985, 0.04612522994611534)	0.917067	1	1	rs76003300	-	-
78	chr9	87923328	87923328	C	T	SPATA31C1	stopgain	SPATA31C1:NM_001145124:exon4:c.C3421T:p.Q1141X		0.023166	0.0123839	0.903545	24	8	1012	638	1.8913	0.637267	0.121346	(-0.1689963490700619, 1.44352979340104)	0.917067	1	1	rs595203	-	-
105	chr9	123440315	123440315	-	A	DENND1A				0.0260618	0.0139319	0.903545	27	9	1009	637	1.89395	0.638667	0.0999395	(-0.12221595287324716, 1.3995498006465747)	0.917067	1	1	rs759352081	['Membrane Trafficking', 'Vesicle-mediated transport', 'RAB GEFs exchange GTP for GDP on RABs', 'Rab regulation of trafficking']	3
106	chr9	124476406	124476406	G	A	PSMB7;NR5A1				0.00289575	0.00928793	-1.68142	3	6	1033	640	0.309777	-1.1719	0.0983022	(-2.5613079761688216, 0.21750502951708994)	0.917067	1	1	rs117236443	-	-
123	chr9	131482560	131482560	A	C	PRRC2B	nonsynonymous SNV	PRRC2B:NM_013318:exon20:c.A5173C:p.K1725Q	11.34	0.0019305	0.00928793	-2.26638	2	6	1034	640	0.206319	-1.57833	0.0536813	(-3.181671303004568, 0.02500296823903514)	0.917067	1	1	rs45572436	-	-
144	chr9	136676978	136676978	G	A	AGPAT2	nonsynonymous SNV	AGPAT2:NM_001012727:exon3:c.C475T:p.R159C,AGPAT2:NM_006412:exon3:c.C475T:p.R159C	25.5	0.0173745	0.00619195	1.48851	18	4	1018	642	2.83792	1.04307	0.0602184	(-0.044833996132077614, 2.130975002843612)	0.917067	1	1	rs142993240	['Metabolism', 'Synthesis of PA', 'Glycerophospholipid biosynthesis', 'Phospholipid metabolism', 'Innate Immune System', 'Immune System', 'Metabolism of lipids', 'Neutrophil degranulation']	-
146	chr9	137046007	137046007	G	A	NPDC1				0.0187713	0.040201	-1.0987	11	16	575	382	0.456739	-0.783643	0.0485037	(-1.5621360918271823, -0.005149671437189474)	0.917067	1	1	rs147069012	['Adaptive Immune System', 'Immune System', 'Immunoregulatory interactions between a Lymphoid and a non-Lymphoid cell']	-
151	chr9	137892232	137892232	T	A	LOC100133077				0.0135135	0.00309598	2.12594	14	2	1022	644	4.41096	1.48409	0.0501204	(-0.0007793008943790536, 2.9689635096864144)	0.917067	1	1	rs75312994	-	-
7	chrY	9547022	9547022	A	C	TSPY10;RBMY3AP				0.0114286	0.0235294	-1.04182	8	8	692	332	0.479769	-0.734451	0.145398	(-1.7231302093727079, 0.2542282359703467)	0.917067	1	1	rs113287197	-	-
13	chrY	11350938	11350938	A	T	TTTY23;GYG2P1				0.0267442	0.0664062	-1.31209	23	34	837	478	0.386324	-0.95108	0.000569114	(-1.49203261409808, -0.41012667927198165)	0.917067	1	1	rs770199770	-	-
1	chr4	681988	681988	G	C	MYL5;SLC49A3	nonsynonymous SNV	MYL5:NM_002477:exon7:c.G516C:p.E172D,MYL5:NM_001363650:exon8:c.G393C:p.E131D	1.244	0.011583	0.0232198	-1.00335	12	15	1024	631	0.492969	-0.707309	0.070161	(-1.4728538354130611, 0.05823484666816181)	0.917067	1	1	rs76052398	-	-
3	chr4	973403	973403	G	A	DGKQ	nonsynonymous SNV	DGKQ:NM_001347:exon1:c.C80T:p.P27L	18.03	0.186441	0.123077	0.599156	44	16	192	114	1.63281	0.490304	0.119552	(-0.12703033289071963, 1.1076383089811077)	0.917067	1	1	rs17855876	['Hemostasis', 'Effects of PIP2 hydrolysis', 'Signal Transduction', 'Signaling by GPCR', 'GPCR downstream signalling', 'G alpha (q) signalling events', 'Platelet activation, signaling and aggregation']	12
4	chr4	987955	987955	C	T	SLC26A1				0.0222008	0.0108359	1.03479	23	7	1013	639	2.07263	0.728817	0.0935547	(-0.12300668167597473, 1.5806407156813498)	0.917067	1	1	rs147498923	['Metabolism', 'Phase II - Conjugation of compounds', 'Cytosolic sulfonation of small molecules', 'Glycosaminoglycan metabolism', 'Transport and synthesis of PAPS', 'Biological oxidations', 'Transport of small molecules', 'Transport of inorganic cations/anions and amino acids/oligopeptides', 'SLC-mediated transmembrane transport', 'Multifunctional anion exchangers', 'Metabolism of carbohydrates']	32
20	chr4	6674328	6674328	C	G	LOC93622				0.0242718	0.0154799	0.64889	25	10	1005	636	1.58209	0.458746	0.224381	(-0.2812985317310285, 1.19879148117323)	0.917067	1	1	rs144887497	-	-
34	chr4	10025885	10025885	-	A	SLC2A9				0.0144788	0.00773994	0.903545	15	5	1021	641	1.88345	0.633104	0.222387	(-0.3838249696741256, 1.6500328245223548)	0.917067	1	1	rs768738572	['Cellular hexose transport', 'Transport of small molecules', 'SLC-mediated transmembrane transport', 'Disease', 'Defective SLC2A9 causes hypouricemia renal 2 (RHUC2)', 'SLC transporter disorders', 'Disorders of transmembrane transporters']	-
49	chr4	74099113	74099113	C	T	CXCL2	nonsynonymous SNV	CXCL2:NM_002089:exon1:c.G8A:p.R3H	0.052	0.0212355	0.00928793	1.19305	22	6	1014	640	2.31427	0.839093	0.0701369	(-0.0690070190940858, 1.747192971759786)	0.917067	1	1	rs186397980	['Signal Transduction', 'Innate Immune System', 'Immune System', 'Signaling by GPCR', 'Class A/1 (Rhodopsin-like receptors)', 'Peptide ligand-binding receptors', 'Chemokine receptors bind chemokines', 'GPCR downstream signalling', 'G alpha (i) signalling events', 'GPCR ligand binding', 'Neutrophil degranulation', 'Cytokine Signaling in Immune system', 'Signaling by Interleukins', 'Interleukin-10 …	1
50	chr4	75940890	75940892	CAG	-	NAAA	nonframeshift deletion	NAAA:NM_001042402:exon1:c.58_60del:p.L20del,NAAA:NM_001363719:exon1:c.58_60del:p.L20del,NAAA:NM_014435:exon1:c.58_60del:p.L20del		0.0173745	0.0433437	-1.31885	18	28	1018	618	0.390261	-0.940939	0.00213253	(-1.5414383052370568, -0.3404406786265767)	0.917067	1	1	rs770997827	['Neurotransmitter release cycle', 'Transmission across Chemical Synapses', 'Neuronal System']	-
51	chr4	85721846	85721846	C	A	ARHGAP24				0.0019305	0.00928793	-2.26638	2	6	1034	640	0.206319	-1.57833	0.0536813	(-3.181671303004568, 0.02500296823903514)	0.917067	1	1	rs6816135	['Signal Transduction', 'Signaling by Rho GTPases', 'RHOA GTPase cycle', 'RHO GTPase cycle', 'CDC42 GTPase cycle', 'RAC1 GTPase cycle', 'Signaling by Rho GTPases, Miro GTPases and RHOBTB3']	-
57	chr4	87616109	87616109	A	T	DSPP	nonsynonymous SNV	DSPP:NM_014208:exon5:c.A3447T:p.E1149D	0.064	0.0172065	0.0392157	-1.18848	17	24	971	588	0.428939	-0.84644	0.00842395	(-1.476136943021333, -0.21674307034752305)	0.917067	1	1	rs200612038	['Extracellular matrix organization', 'ECM proteoglycans']	2
58	chr4	87616146	87616154	AGCAGCGAT	-	DSPP	nonframeshift deletion	DSPP:NM_014208:exon5:c.3484_3492del:p.D1176_S1178del		0.0135135	0.0280374	-1.05295	14	18	1022	624	0.474886	-0.744681	0.0385615	(-1.4501730309638396, -0.03918863038641551)	0.917067	1	1	rs537399785	['Extracellular matrix organization', 'ECM proteoglycans']	2
76	chr4	125318627	125318627	A	G	FAT4	nonsynonymous SNV	FAT4:NM_001291285:exon1:c.A2216G:p.N739S,FAT4:NM_001291303:exon1:c.A2216G:p.N739S,FAT4:NM_024582:exon1:c.A2216G:p.N739S	8.839	0.00289575	0.00928793	-1.68142	3	6	1033	640	0.309777	-1.1719	0.0983022	(-2.5613079761688216, 0.21750502951708994)	0.917067	1	1	rs200512777	-	18
77	chr4	127699989	127699989	-	T	INTU				0.0250965	0.0123839	1.01902	26	8	1010	638	2.05297	0.719288	0.0775098	(-0.07930815324869844, 1.5178834929509621)	0.917067	1	1	rs761029531	['Signal Transduction', 'Signaling by Hedgehog', "Hedgehog 'off' state"]	13
78	chr4	140133065	140133065	G	A	LOC101927516				0.0318533	0.0170279	0.903545	33	11	1003	635	1.8993	0.641486	0.0682597	(-0.04808647157185342, 1.3310594707695842)	0.917067	1	1	rs116599841	-	-
84	chr4	153603986	153603986	A	G	TMEM131L	nonsynonymous SNV	TMEM131L:NM_001131007:exon25:c.A2974G:p.T992A,TMEM131L:NM_015196:exon25:c.A2971G:p.T991A	0.001	0.0279923	0.0154799	0.854635	29	10	1007	636	1.83158	0.605178	0.102105	(-0.1204005091545357, 1.3307573243825115)	0.917067	1	1	rs36023829	-	-
88	chr4	155785283	155785283	T	G	GUCY1B1	nonsynonymous SNV	GUCY1B1:NM_001291951:exon5:c.T317G:p.I106S	4.039	0.0250965	0.0139319	0.849097	26	9	1010	637	1.822	0.599936	0.124016	(-0.1645318779324786, 1.3644038907767198)	0.917067	1	1	rs17033528	['Hemostasis', 'Nitric oxide stimulates guanylate cyclase', 'Muscle contraction', 'Platelet homeostasis', 'Smooth Muscle Contraction']	-
90	chr4	169096518	169096518	C	T	SH3RF1				0.0444015	0.0216718	1.03479	46	14	990	632	2.09755	0.740769	0.0166742	(0.1342551963652292, 1.3472818394188881)	0.917067	1	1	rs3749572	['Adaptive Immune System', 'Signal Transduction', 'Immune System', 'Signaling by Rho GTPases', 'RHO GTPase cycle', 'RHOV GTPase cycle', 'Signaling by Rho GTPases, Miro GTPases and RHOBTB3', 'Antigen processing: Ubiquitination & Proteasome degradation', 'Class I MHC mediated antigen processing & presentation']	3
91	chr4	174493179	174493179	C	T	HPGD	nonsynonymous SNV	HPGD:NM_001256306:exon4:c.G430A:p.D144N,HPGD:NM_001256307:exon5:c.G271A:p.D91N,HPGD:NM_000860:exon6:c.G634A:p.D212N,HPGD:NM_001256301:exon6:c.G271A:p.D91N	21.5	0.00965251	0.0201238	-1.05993	10	13	1026	633	0.474584	-0.745317	0.0785293	(-1.5756514281359637, 0.08501769202790388)	0.917067	1	1	rs148874494	['Metabolism', 'Synthesis of Lipoxins (LX)', 'Metabolism of lipids', 'Biosynthesis of D-series resolvins', 'Biosynthesis of DHA-derived SPMs', 'Biosynthesis of specialized proresolving mediators (SPMs)', 'Biosynthesis of EPA-derived SPMs', 'Biosynthesis of E-series 18(S)-resolvins', 'Arachidonic acid metabolism', 'Synthesis of Prostaglandins (PG) and Thromboxanes (TX)', 'Fatty acid metabolism']	-
95	chr4	177966657	177966657	-	TT	LINC01098				0.0173745	0.00773994	1.16658	18	5	1018	641	2.2668	0.818368	0.107211	(-0.17735906304770166, 1.8140952735922338)	0.917067	1	1		-	-
5	chr16	661006	661016	CCCCCCCCCCG	-	WDR90				0.00663717	0.0221088	-1.73598	6	13	898	575	0.295529	-1.21899	0.0140683	(-2.191974273721253, -0.24600555775540855)	0.917067	5	0	rs779417177	-	-
23	chr16	2038400	2038400	-	CC	SLC9A3R2				0.0019305	0.0154799	-3.00335	2	10	1034	636	0.123017	-2.09543	0.00694477	(-3.6168203683579248, -0.5740384399667806)	0.917067	5	0	rs771952024	-	-
66	chr16	21402594	21402594	G	A	NPIPB3	unknown	UNKNOWN	19.49	0.00107066	0.015	-3.80839	1	9	933	591	0.0703823	-2.65381	0.01192	(-4.722365144736611, -0.5852623768183198)	0.917067	5	0	rs377094903	-	-
189	chr16	89948854	89948854	A	T	DEF8				0.277778	0.0454545	2.61143	30	2	78	42	8.07692	2.08901	0.00565658	(0.6093181816644748, 3.568703803727499)	0.917067	5	0	rs192110882	-	-
15	chr8	7972949	7972949	G	A	USP17L8	nonsynonymous SNV	USP17L8:NM_001256872:exon1:c.C305T:p.P102L	4.37	0.0307692	0.150943	-2.29445	4	16	126	90	0.178571	-1.72277	0.00277207	(-2.851317228271525, -0.5942159672106817)	0.917067	5	0	rs765850356	['Metabolism of proteins', 'Deubiquitination', 'Ub-specific processing proteases', 'Post-translational protein modification']	-
38	chr8	17268839	17268839	T	C	VPS37A				0.0223301	0.00464396	2.26556	23	3	1007	643	4.8954	1.5883	0.00991646	(0.38111091261285956, 2.7954806049473326)	0.917067	5	0	rs117165264	['Membrane Trafficking', 'Vesicle-mediated transport', 'Endosomal Sorting Complex Required For Transport (ESCRT)', 'HIV Life Cycle', 'Budding and maturation of HIV virion', 'Late Phase of HIV Life Cycle', 'HIV Infection', 'Disease', 'Membrane binding and targetting of GAG proteins', 'Synthesis And Processing Of GAG, GAGPOL Polyproteins', 'Assembly Of The HIV Virion', 'Infectious disease', 'HCMV I…	-
85	chr8	108234961	108234966	AAAAAA	-	EIF3E				0.0175781	0.00154799	3.50532	18	1	1006	645	11.5408	2.44588	0.017417	(0.4297876288340414, 4.461981819230463)	0.917067	5	0		['Metabolism of proteins', 'Eukaryotic Translation Initiation', 'Formation of the ternary complex, and subsequently, the 43S complex', 'Ribosomal scanning and start codon recognition', 'Cap-dependent Translation Initiation', 'Translation', 'L13a-mediated translational silencing of Ceruloplasmin expression', 'Translation initiation complex formation', 'Activation of the mRNA upon binding of the ca…	-
133	chr19	34226376	34226379	TTTT	-	LSM14A				0.00196078	0.015674	-2.99887	2	10	1018	628	0.123379	-2.09249	0.00702579	(-3.613928383786299, -0.5710575023664408)	0.917067	5	0		-	-
169	chr19	40275260	40275260	G	A	AKT2				0.000965251	0.0123839	-3.68142	1	8	1035	638	0.0770531	-2.56326	0.0157807	(-4.644455251129713, -0.4820646769393164)	0.917067	5	0	rs147626690	['PI3K Cascade', 'IRS-mediated signalling', 'Signal Transduction', 'Activation of AKT2', 'MTOR signalling', 'Inhibition of TSC complex formation by PKB', 'Signaling by Type 1 Insulin-like Growth Factor 1 Receptor (IGF1R)', 'IGF1R signaling cascade', 'IRS-related events triggered by IGF1R', 'Insulin receptor signalling cascade', 'Signaling by Insulin receptor', 'Signaling by Receptor Tyrosine Kina…	-
173	chr19	41878963	41878963	T	A	CD79A				0.00252525	0.0192308	-2.92892	2	10	790	510	0.129114	-2.04706	0.00839724	(-3.569318379228216, -0.5248018851253773)	0.917067	5	0		['Adaptive Immune System', 'Immune System', 'CD22 mediated BCR regulation', 'Antigen activates B Cell Receptor (BCR) leading to generation of second messengers', 'Signaling by the B Cell Receptor (BCR)']	-
59	chr11	56376239	56376239	A	G	OR8U1;OR8U8	nonsynonymous SNV	OR8U1:NM_001005204:exon1:c.A616G:p.M206V	0.081	0.233333	0.0416667	2.48543	35	4	115	92	7	1.94591	0.000365504	(0.8757327579627416, 3.0160875401478844)	0.917067	5	0	rs78460947	-	-
65	chr11	59835971	59835971	G	A	CBLIF	nonsynonymous SNV	CBLIF:NM_005142:exon7:c.C910T:p.P304S	17.95	0.0019305	0.0154799	-3.00335	2	10	1034	636	0.123017	-2.09543	0.00694477	(-3.6168203683579248, -0.5740384399667806)	0.917067	5	0	rs150926439	['Metabolism', 'Cobalamin (Cbl, vitamin B12) transport and metabolism', 'Metabolism of water-soluble vitamins and cofactors', 'Metabolism of vitamins and cofactors', 'Disease', 'Defects in cobalamin (B12) metabolism', 'Defects in vitamin and cofactor metabolism', 'Defective GIF causes intrinsic factor deficiency', 'Defective AMN causes hereditary megaloblastic anemia 1', 'Defective CUBN causes he…	-
78	chr11	64810156	64810156	A	T	MEN1				0.00576037	0.0228873	-1.99032	5	13	863	555	0.247348	-1.39696	0.00827713	(-2.4338579349736262, -0.3600581097552329)	0.917067	5	0		['Signal Transduction', 'Signaling by TGF-beta Receptor Complex', 'Signaling by Rho GTPases', 'RHO GTPase Effectors', 'Signaling by WNT', 'TCF dependent signaling in response to WNT', 'Formation of the beta-catenin:TCF transactivating complex', 'Generic Transcription Pathway', 'Transcriptional activity of SMAD2/SMAD3:SMAD4 heterotrimer', 'SMAD2/SMAD3:SMAD4 heterotrimer regulates transcription', '…	-
117	chr11	89971260	89971260	T	G	TRIM64				0.016	0.0777778	-2.28129	4	14	246	166	0.192799	-1.64611	0.00425063	(-2.7746064393309373, -0.5176069928114353)	0.917067	5	0	rs1818530	-	-
36	chr13	99970414	99970422	GGCGGCGGC	-	ZIC5	nonframeshift deletion	ZIC5:NM_033132:exon1:c.1254_1262del:p.P422_P424del		0.00731707	0.0252708	-1.78813	6	14	814	540	0.28431	-1.25769	0.0104377	(-2.2202201783072235, -0.29515799535562315)	0.917067	5	0	rs759482702	-	-
38	chr13	99970414	99970428	GGCGGCGGCGGCGGC	-	ZIC5	nonframeshift deletion	ZIC5:NM_033132:exon1:c.1248_1262del:p.P420_P424del		0.00365854	0.0234657	-2.68122	3	13	817	541	0.15281	-1.87856	0.00347819	(-3.1386305640660543, -0.6184832055478433)	0.917067	5	0	rs778996938	-	-
49	chr13	112068073	112068073	G	A	SOX1	nonsynonymous SNV	SOX1:NM_005986:exon1:c.G415A:p.G139S	25.3	0.00579151	0.0201238	-1.7969	6	13	1030	633	0.283645	-1.26003	0.0110932	(-2.232421430895958, -0.28764566373001654)	0.917067	5	0	rs139160172	-	-
49	chrX	37009146	37009146	C	T	FAM47C	nonsynonymous SNV	FAM47C:NM_001013736:exon1:c.C736T:p.L246F	15.09	0.000965251	0.0139319	-3.85134	1	9	1035	637	0.0683843	-2.68261	0.0110205	(-4.750951464280572, -0.6142717906464799)	0.917067	5	0	rs148119466	-	-
104	chrX	73850701	73850701	G	C	XIST				0.0196687	0.0015674	3.64946	19	1	947	637	12.7804	2.54791	0.0131271	(0.5345223800269556, 4.561296703078095)	0.917067	5	0	rs763261086	-	-
46	chr15	36691260	36691260	G	A	C15orf41				0.019305	0.00154799	3.64051	20	1	1016	645	12.6969	2.54135	0.0132448	(0.5305659387626602, 4.552141985660011)	0.917067	5	0	rs754818013	-	-
69	chr10	79307380	79307380	-	GGGG	ZMIZ1				0.00868726	0.0309598	-1.83342	9	20	1027	626	0.274294	-1.29355	0.00138719	(-2.0865101963603037, -0.5005988737321588)	0.917067	5	0		-	2
114	chr10	101600898	101600898	A	T	DPCD				0.030888	0.00059453	5.69915	32	0	1004	646	41.1793	3.71794	0.00913276	(0.922808113679868, 6.513062460101331)	0.917067	5	0		-	-
75	chr12	66203747	66203747	A	G	IRAK3	nonsynonymous SNV	IRAK3:NM_007199:exon2:c.A170G:p.H57R	12.99	0.00482625	0.0185759	-1.94445	5	12	1031	634	0.256224	-1.3617	0.0108724	(-2.409653869768941, -0.31375466409832775)	0.917067	5	0	rs35239505	['Cytokine Signaling in Immune system', 'Immune System', 'Interleukin-1 family signaling', 'Signaling by Interleukins', 'Interleukin-1 signaling', 'Toll Like Receptor 4 (TLR4) Cascade', 'MyD88:MAL(TIRAP) cascade initiated on plasma membrane', 'Toll Like Receptor TLR1:TLR2 Cascade', 'Toll Like Receptor TLR6:TLR2 Cascade', 'Innate Immune System', 'Toll-like Receptor Cascades', 'Toll Like Receptor 2…	-
18	chr5	23517963	23517963	C	A	PRDM9				0.000965251	0.0123839	-3.68142	1	8	1035	638	0.0770531	-2.56326	0.0157807	(-4.644455251129713, -0.4820646769393164)	0.917067	5	0	rs144981567	['Generic Transcription Pathway', 'RNA Polymerase II Transcription', 'Gene expression (Transcription)', 'Reproduction', 'Meiosis', 'Cell Cycle', 'PKMTs methylate histone lysines', 'Chromatin modifying enzymes', 'Chromatin organization', 'Meiotic recombination']	-
4	chr20	3917074	3917074	A	G	PANK2				0.000965251	0.0154799	-4.00335	1	10	1035	636	0.0614493	-2.78954	0.00789187	(-4.84754136139043, -0.7315451093163561)	0.917067	5	0	rs188126598	['Metabolism', 'Coenzyme A biosynthesis', 'Metabolism of water-soluble vitamins and cofactors', 'Metabolism of vitamins and cofactors', 'Vitamin B5 (pantothenate) metabolism']	-
14	chr20	23085831	23085831	-	ACCC	CD93	frameshift insertion	CD93:NM_012072:exon1:c.361_362insGGGT:p.E121Gfs*8		0.0019305	0.0170279	-3.14085	2	11	1034	635	0.111658	-2.19231	0.00442947	(-3.7021865288265707, -0.6824397680016454)	0.917067	5	0		['Innate Immune System', 'Immune System', 'Neutrophil degranulation']	-
25	chr6	27359204	27359204	-	T	ZNF204P				0.00579151	0.0216718	-1.90381	6	14	1030	632	0.262968	-1.33572	0.00647201	(-2.2972010349220033, -0.3742440600060507)	0.917067	5	0	rs140505698	-	-
88	chr6	116925507	116925507	G	C	RFX6	nonsynonymous SNV	RFX6:NM_173560:exon16:c.G1733C:p.R578P	25.8	0.00482625	0.0201238	-2.05993	5	13	1031	633	0.236141	-1.44333	0.00632958	(-2.4794641105938284, -0.40718690320661266)	0.917067	5	0	rs146115506	['Developmental Biology', 'Regulation of beta-cell development', 'Regulation of gene expression in beta cells']	-
114	chr6	152310667	152310667	-	T	SYNE1				0.0202703	0.00464396	2.12594	21	3	1015	643	4.43448	1.48941	0.0161674	(0.2756680734709025, 2.703153890163186)	0.917067	5	0	rs545568394	['Meiotic synapsis', 'Reproduction', 'Meiosis', 'Cell Cycle']	8
153	chr7	140734788	140734797	AAAAAAAAAG	-	BRAF				0.0203488	0.00464396	2.13152	21	3	1011	643	4.45203	1.49336	0.0158879	(0.27961057740356776, 2.7071087311413535)	0.917067	5	0	rs774138098	['Spry regulation of FGF signaling', 'Signal Transduction', 'Signaling by NTRKs', 'Prolonged ERK activation events', 'Frs2-mediated activation', 'Signaling by NTRK1 (TRKA)', 'Signalling to ERKs', 'Signaling by FGFR', 'Negative regulation of FGFR1 signaling', 'Negative regulation of FGFR2 signaling', 'Negative regulation of FGFR3 signaling', 'Negative regulation of FGFR4 signaling', 'Signaling by …	-
119	chr3	195577187	195577188	AA	-	APOD				0.00100604	0.0154799	-3.94364	1	10	993	636	0.0640483	-2.74812	0.00886647	(-4.806153459401588, -0.6900809279966049)	0.917067	5	0	rs776234111	['Transport of small molecules', 'Transport of vitamins, nucleosides, and related molecules', 'SLC-mediated transmembrane transport', 'Transport of fatty acids', 'Signal Transduction', 'Signaling by Nuclear Receptors', 'NR1H2 and NR1H3-mediated signaling', 'NR1H3 & NR1H2 regulate gene expression linked to cholesterol transport and efflux']	-
92	chr14	105488404	105488404	C	G	CRIP1				0.0232558	0.00464396	2.32416	24	3	1008	643	5.10317	1.62986	0.00798837	(0.4255653856664112, 2.83416024890587)	0.917067	5	0		-	-
53	chr2	70958430	70958430	A	T	ATP6V1B1				0.0212355	0.00464396	2.19305	22	3	1014	643	4.65023	1.53692	0.0128154	(0.3266023926813941, 2.747231016871998)	0.917067	5	0		['ROS and RNS production in phagocytes', 'Signal Transduction', 'Innate Immune System', 'Immune System', 'Cellular responses to stress', 'Transport of small molecules', 'Signaling by Insulin receptor', 'Insulin receptor recycling', 'Cellular responses to stimuli', 'Signaling by Receptor Tyrosine Kinases', 'Iron uptake and transport', 'Transferrin endocytosis and recycling', 'Amino acids regulate …	-
105	chr2	130645801	130645801	T	C	POTEJ				0.00506329	0.0241636	-2.25469	4	13	786	525	0.20552	-1.58221	0.00588965	(-2.708297872107262, -0.45612918025119575)	0.917067	5	0	rs754098805	-	-
167	chr2	227308920	227308920	A	G	COL4A3	nonsynonymous SNV	COL4A3:NM_000091:exon49:c.A4484G:p.Q1495R	13.09	0.0019305	0.0154799	-3.00335	2	10	1034	636	0.123017	-2.09543	0.00694477	(-3.6168203683579248, -0.5740384399667806)	0.917067	5	0	rs77964815	['Collagen degradation', 'Degradation of the extracellular matrix', 'Extracellular matrix organization', 'Collagen formation', 'Signal Transduction', 'Collagen biosynthesis and modifying enzymes', 'Signaling by PDGF', 'Assembly of collagen fibrils and other multimeric structures', 'Integrin cell surface interactions', 'Crosslinking of collagen fibrils', 'Laminin interactions', 'Non-integrin membr…	-
128	chr1	54195589	54195589	C	T	CYB5RL	nonsynonymous SNV	CYB5RL:NM_001031672:exon3:c.G28A:p.D10N,CYB5RL:NM_001353353:exon3:c.G28A:p.D10N,CYB5RL:NM_001353356:exon3:c.G28A:p.D10N	22.3	0.0183398	0.00154799	3.56651	19	1	1017	645	12.0501	2.48908	0.0153871	(0.4757776524983832, 4.502376147328922)	0.917067	5	0	rs11544199	['Erythrocytes take up carbon dioxide and release oxygen', 'O2/CO2 exchange in erythrocytes', 'Transport of small molecules']	-
170	chr1	120441291	120441291	G	A	NBPF8	nonsynonymous SNV	NBPF8:NM_001037501:exon8:c.G580A:p.A194T		0.00582524	0.0263158	-2.17554	6	17	1024	629	0.216797	-1.52879	0.00136804	(-2.4647805214138723, -0.5928083260404733)	0.917067	5	0		-	-
211	chr1	152214326	152214326	T	C	HRNR	nonsynonymous SNV	HRNR:NM_001009931:exon3:c.A7303G:p.S2435G	0.025	0.00678295	0.0296875	-2.12987	7	19	1025	621	0.223209	-1.49965	0.000752861	(-2.3719389180987633, -0.6273523614015508)	0.917067	5	0	rs78949172	['Innate Immune System', 'Immune System', 'Neutrophil degranulation']	-
274	chr1	196790249	196790249	T	A	CFHR3				0.00059453	0.0217391	-5.1924	0	12	862	540	0.0261021	-3.64574	0.0116022	(-6.476748522224241, -0.8147314006823954)	0.917067	5	0	rs200264114	['Complement cascade', 'Innate Immune System', 'Immune System', 'Regulation of Complement cascade']	-
281	chr1	202187020	202187020	-	TCCTCGCTCCTCGCTCCTCGCTCCTCGG	PTPRVP				0.00059453	0.0154799	-4.7025	0	10	1036	636	0.030695	-3.48366	0.0162834	(-6.325629307587308, -0.6416829584792869)	0.917067	5	0	rs755343113	['Hemostasis', 'Platelet degranulation ', 'Degradation of the extracellular matrix', 'Extracellular matrix organization', 'Elastic fibre formation', 'Fibronectin matrix formation', 'Signal Transduction', 'Molecules associated with elastic fibres', 'Integrin cell surface interactions', 'Syndecan interactions', 'Non-integrin membrane-ECM interactions', 'ECM proteoglycans', 'Integrin signaling', 'GR…	-
26	chr9	34557883	34557883	A	T	CNTFR	nonsynonymous SNV	CNTFR:NM_001842:exon4:c.T421A:p.F141I,CNTFR:NM_001207011:exon5:c.T421A:p.F141I,CNTFR:NM_147164:exon5:c.T421A:p.F141I	27.4	0.0222008	0.00619195	1.84214	23	4	1013	642	3.64413	1.29312	0.0174681	(0.22673942486679555, 2.3594938836342783)	0.917067	5	0		['Cytokine Signaling in Immune system', 'Immune System', 'Signaling by Interleukins', 'Interleukin-6 family signaling', 'IL-6-type cytokine receptor ligand interactions']	1
42	chr9	42185802	42185802	A	G	SPATA31A6				0.0196078	0.0746606	-1.92892	14	33	700	409	0.247879	-1.39482	1.76957e-05	(-2.0317438817066593, -0.7578869399969889)	0.417288	5	0	rs2259625	-	-
61	chr9	76302117	76302117	T	-	PCSK5				0.0318533	0.00928793	1.77801	33	6	1003	640	3.50947	1.25547	0.00494467	(0.37997520189778267, 2.1309557593626316)	0.917067	5	0	rs765365942	['Signal Transduction', 'Signaling by NTRKs', 'NGF processing', 'Plasma lipoprotein assembly, remodeling, and clearance', 'Transport of small molecules', 'Assembly of active LPL and LIPC lipase complexes', 'Plasma lipoprotein remodeling', 'Signaling by Receptor Tyrosine Kinases', 'Expression and Processing of Neurotrophins']	1
68	chr9	83626456	83626456	G	A	IDNK				0.003861	0.0185759	-2.26638	4	12	1032	634	0.20478	-1.58582	0.00621372	(-2.7217167919795715, -0.4499177685652125)	0.917067	5	0	rs12379187	-	-
121	chr9	130835353	130835353	-	C	ABL1				0.567568	0.00059453	9.89883	42	0	32	24	63	4.14313	0.00421953	(1.3050918586770313, 6.981177594106036)	0.917067	5	0	rs11433464	['Developmental Biology', 'Signal Transduction', 'Innate Immune System', 'Immune System', 'Signaling by Rho GTPases', 'RHO GTPase Effectors', 'Fcgamma receptor (FCGR) dependent phagocytosis', 'Regulation of actin dynamics for phagocytic cup formation', 'Generic Transcription Pathway', 'Myogenesis', 'RHO GTPases Activate WASPs and WAVEs', 'HDR through Single Strand Annealing (SSA)', 'DNA Double-St…	-
21	chr4	7192755	7192757	CTG	-	SORCS2	nonframeshift deletion	SORCS2:NM_020777:exon1:c.109_111del:p.L43del		0.0060241	0.0604396	-3.32668	2	11	330	171	0.0942149	-2.36218	0.00228767	(-3.880089702586994, -0.8442646778055878)	0.917067	5	0	rs765371084	-	-
61	chr16	20465673	20465673	G	A	ACSM2A	nonsynonymous SNV	ACSM2A:NM_001308169:exon2:c.G97A:p.V33M,ACSM2A:NM_001308172:exon3:c.G334A:p.V112M,ACSM2A:NM_001308954:exon4:c.G334A:p.V112M	23.1	0.0183398	0.00309598	2.56651	19	2	1017	644	6.01573	1.79438	0.0160291	(0.3340173179874051, 3.2547389393371726)	0.917067	4	0	rs62035041	['Metabolism', 'Phase II - Conjugation of compounds', 'Amino Acid conjugation', 'Conjugation of carboxylic acids', 'Conjugation of salicylate with glycine', 'Conjugation of benzoate with glycine', 'Conjugation of phenylacetate with glutamine', 'Biological oxidations']	-
74	chr16	22459466	22459466	T	G	SMG1P1				0.00178571	0.0238095	-3.73697	1	10	559	410	0.0733453	-2.61258	0.0129108	(-4.6721516667964975, -0.5530031461050848)	0.917067	4	0		-	-
78	chr16	22534327	22534327	T	0	NPIPB5				0.00320513	0.0184564	-2.52567	3	11	933	585	0.171003	-1.76608	0.00687972	(-3.0468548971388283, -0.4852977783526673)	0.917067	4	0		-	-
87	chr16	28458210	28458210	A	G	EIF3C;CLN3				0.00153846	0.0195312	-3.66622	1	10	649	502	0.0773498	-2.55942	0.0148343	(-4.61834363671705, -0.5004917432957652)	0.917067	4	0	rs879940528	-	-
99	chr16	30223160	30223160	C	T	NPIPB12;NPIPB13	nonsynonymous SNV	NPIPB13:NM_001321892:exon9:c.G3286A:p.V1096M,NPIPB12:NM_001355401:exon11:c.G2656A:p.V886M	10.55	0.0389908	0.00740741	2.39609	17	2	419	268	5.43675	1.69318	0.0242785	(0.22002251199787248, 3.166341936172107)	0.917067	4	0		-	-
149	chr16	75242649	75242649	T	C	BCAR1	nonsynonymous SNV	BCAR1:NM_001170715:exon2:c.A508G:p.T170A,BCAR1:NM_001170716:exon2:c.A508G:p.T170A,BCAR1:NM_001170717:exon2:c.A454G:p.T152A,BCAR1:NM_001170718:exon2:c.A454G:p.T152A,BCAR1:NM_001170719:exon2:c.A448G:p.T150A,BCAR1:NM_014567:exon2:c.A454G:p.T152A,BCAR1:NM_001170714:exon3:c.A592G:p.T198A	0.002	0.0019305	0.0139319	-2.85134	2	9	1034	637	0.136901	-1.9885	0.0111351	(-3.523849176161905, -0.45314641638306696)	0.917067	4	0	rs61736968	['Hemostasis', 'Signal Transduction', 'Downstream signal transduction', 'Signaling by PDGF', 'Signaling by VEGF', 'Integrin signaling', 'p130Cas linkage to MAPK signaling for integrins', 'VEGFA-VEGFR2 Pathway', 'Platelet activation, signaling and aggregation', 'Platelet Aggregation (Plug Formation)', 'Signaling by Receptor Tyrosine Kinases', 'Signaling by PTK6', 'PTK6 Regulates RHO GTPases, RAS G…	-
192	chr16	90093848	90093848	T	C	PRDM7;FAM157C				0.00482625	0.0185759	-1.94445	5	12	1031	634	0.256224	-1.3617	0.0108724	(-2.409653869768941, -0.31375466409832775)	0.917067	4	0	rs11861625	-	-
3	chr8	7332607	7332607	G	C	USP17L1;USP17L3	nonsynonymous SNV	USP17L3:NM_001256871:exon1:c.G221C:p.R74T,USP17L1:NM_001256873:exon1:c.G221C:p.R74T	0.551	0.00146628	0.0174419	-3.57233	1	9	681	507	0.0827215	-2.49228	0.0182391	(-4.561455748610307, -0.4230960111787905)	0.917067	4	0		-	-
41	chr8	19405817	19405817	C	G	CSGALNACT1	nonsynonymous SNV	CSGALNACT1:NM_001354497:exon8:c.G1562C:p.R521P,CSGALNACT1:NM_001354476:exon9:c.G1562C:p.R521P,CSGALNACT1:NM_001354483:exon9:c.G1562C:p.R521P,CSGALNACT1:NM_001354490:exon9:c.G1562C:p.R521P,CSGALNACT1:NM_001354492:exon9:c.G1562C:p.R521P,CSGALNACT1:NM_001130518:exon10:c.G1562C:p.R521P,CSGALNACT1:NM_001354475:exon10:c.G1562C:p.R521P,CSGALNACT1:NM_001354477:exon10:c.G1562C:p.R521P,CSGALNACT1:NM_001354…	34	0.000965251	0.0108359	-3.48877	1	7	1035	639	0.0881988	-2.42816	0.0232789	(-4.525771010028684, -0.3305537907258116)	0.917067	4	0	rs61910741	['Metabolism', 'Glycosaminoglycan metabolism', 'Chondroitin sulfate/dermatan sulfate metabolism', 'Chondroitin sulfate biosynthesis', 'Metabolism of carbohydrates']	-
53	chr8	37835761	37835761	G	A	ADGRA2	nonsynonymous SNV	ADGRA2:NM_032777:exon13:c.G2041A:p.A681T	22.1	0.0019305	0.0139319	-2.85134	2	9	1034	637	0.136901	-1.9885	0.0111351	(-3.523849176161905, -0.45314641638306696)	0.917067	4	0	rs77369926	-	-
5	chr19	624894	624894	T	A	POLRMT	nonsynonymous SNV	POLRMT:NM_005035:exon5:c.A965T:p.Q322L	24.9	0.027027	0.00928793	1.54097	28	6	1008	640	2.96296	1.08619	0.0164233	(0.19891791341666665, 1.9734616239224385)	0.917067	4	0	rs138732981	['Mitochondrial transcription initiation', 'Gene expression (Transcription)', 'Transcription from mitochondrial promoters', 'Mitochondrial biogenesis', 'Organelle biogenesis and maintenance', 'Transcriptional activation of mitochondrial biogenesis']	-
208	chr19	49959769	49959769	G	A	SIGLEC11				0.004	0.018315	-2.19496	3	10	747	536	0.215261	-1.5359	0.020092	(-2.8308716162397873, -0.24093604053611561)	0.917067	4	0	rs202060100	['Adaptive Immune System', 'Innate Immune System', 'Immune System', 'Immunoregulatory interactions between a Lymphoid and a non-Lymphoid cell', 'Neutrophil degranulation']	-
[truncated: 2,113 more rows]

## Sheet: S2
Table S2:performances of training and testing of the predictors trained with screened variants on the 5 Folds plus age and gender covariates
[truncated: 33 more rows]

## Sheet: S3
Table S3:performances of training and testing the classifier with 100% supported variants on the 5 Folds with and without covariates
[truncated: 69 more rows]

[truncated: 9 more sheets: S4, S5, S6, S7, S8, S9, S10, S11, S12]
